# Supplementary material for: A novel single alpha-helix DNA-binding domain in CAF-1 promotes gene silencing and DNA damage survival through tetrasome-length DNA selectivity and spacer function
Source: eLife journal article supplement (doi:10.7554/elife.83538), 2023-06-14
Supplement: fig1-data1 [file 210921 Cy5 30bp EMSA with yCAF1 WT_Table.xlsx]

## Sheet: 210921 Cy5 30bp EMSA with yCAF1
	Name	Volume	Background	Background Level	Background Type	Median Intensity	Average Intensity	Mode Intensity	Std Dev	Variance	Min Intensity	Max Intensity	Percent	Area > Background	Centre X	Centre Y	Width	Height	Area	Comment
	1 cell(1, 1)	555517	0	0	None	14	13.84	14	2.75	7.56	45	4	3.16	40128	454	1122	132	304	40128
	1 cell(2, 1)	537290	0	0	None	13	13.49	14	2.64	6.99	51	2	3.05	39824	585	1122	131	304	39824
	1 cell(3, 1)	541670	0	0	None	13	13.5	14	2.61	6.79	50	4	3.08	40128	717	1122	132	304	40128
	1 cell(4, 1)	537787	0	0	None	13	13.5	14	2.52	6.37	26	3	3.06	39824	848	1121	131	305	39824
	1 cell(5, 1)	576815	0	0	None	14	14.37	14	2.7	7.28	26	3	3.28	40128	980	1121	132	304	40128
	1 cell(6, 1)	612051	0	0	None	15	15.25	14	3.36	11.28	35	4	3.48	40128	1112	1121	132	304	40128
	1 cell(7, 1)	722647	0	0	None	16	18.15	15	6.83	46.62	51	4	4.11	39824	1243	1120	131	305	39824
	1 cell(8, 1)	779541	0	0	None	16	19.43	15	8.67	75.16	70	4	4.43	40128	1375	1120	132	304	40128
	1 cell(9, 1)	887196	0	0	None	18	22.28	16	12.87	165.72	111	5	5.04	39824	1506	1119	131	305	39824
	1 cell(10, 1)	1135371	0	0	None	22	28.29	16	20.25	410.22	183	5	6.45	40128	1638	1118	132	305	40128
	2 cell(1, 1)	1287782	0	0	None	18	40.65	15	53.24	2835	255	4	7.32	31680	462	1430	132	240	31680
	2 cell(2, 1)	1242119	0	0	None	18	39.21	16	55.31	3059.19	255	4	7.06	31680	594	1430	132	241	31680
	2 cell(3, 1)	1208436	0	0	None	18	38.15	15	52.59	2765.41	255	5	6.87	31680	726	1431	132	240	31680
	2 cell(4, 1)	1199127	0	0	None	18	37.85	16	50.33	2533.5	255	6	6.81	31680	858	1431	132	241	31680
	2 cell(5, 1)	1160532	0	0	None	19	36.63	16	47.33	2240.34	255	4	6.59	31680	990	1432	132	240	31680
	2 cell(6, 1)	1148710	0	0	None	20	36.26	16	44.94	2019.6	255	3	6.53	31680	1122	1432	132	240	31680
	2 cell(7, 1)	1049339	0	0	None	21	33.12	16	38	1443.91	253	6	5.96	31680	1254	1432	132	241	31680
	2 cell(8, 1)	941178	0	0	None	20	29.71	16	31.15	970.41	215	6	5.35	31680	1386	1433	132	240	31680
	2 cell(9, 1)	798263	0	0	None	20	25.2	16	21.19	449.2	152	4	4.54	31680	1518	1433	132	241	31680
	2 cell(10, 1)	676849	0	0	None	20	21.37	20	10.89	118.57	96	4	3.85	31680	1650	1434	132	240	31680

## Sheet: Fraction Bound
	Name	Volume	Less Backg.	Fract. Bound	[C]
BOUND	1 cell(1, 1)	555517	18227	0.0207456	0
	1 cell(2, 1)	537290	0	0	1.2e-08
	1 cell(3, 1)	541670	4380	0.00557676	3.7e-08
	1 cell(4, 1)	537787	497	0.000643608	6.4e-08
	1 cell(5, 1)	576815	39525	0.0511556	1.1e-07
	1 cell(6, 1)	612051	74761	0.0939142	1.5e-07
	1 cell(7, 1)	722647	185357	0.229606	1.9e-07
	1 cell(8, 1)	779541	242251	0.320432	2.5e-07
	1 cell(9, 1)	887196	349906	0.485472	4.4e-07
	1 cell(10, 1)	1135371	598081	0.705687	7.6e-07
	MIN	537290
FREE	2 cell(1, 1)	1287782	860368
	2 cell(2, 1)	1242119	814705
	2 cell(3, 1)	1208436	781022
	2 cell(4, 1)	1199127	771713
	2 cell(5, 1)	1160532	733118
	2 cell(6, 1)	1148710	721296
	2 cell(7, 1)	1049339	621925
	2 cell(8, 1)	941178	513764
	2 cell(9, 1)	798263	370849
	2 cell(10, 1)	676849	249435
	MIN
	Area Free	31680
	Area Bound	39824
	Back. Free	427414
