# Supplementary material for: A novel single alpha-helix DNA-binding domain in CAF-1 promotes gene silencing and DNA damage survival through tetrasome-length DNA selectivity and spacer function
Source: eLife journal article supplement (doi:10.7554/elife.83538), 2023-06-14
Supplement: fig1-data1 [file 210921 Cy5 40bp EMSA with yCAF1 WT_Table.xlsx]

## Sheet: 210921 Cy5 40bp EMSA with yCAF1
	Name	Volume	Background	Background Level	Background Type	Median Intensity	Average Intensity	Mode Intensity	Std Dev	Variance	Min Intensity	Max Intensity	Percent	Area > Background	Centre X	Centre Y	Width	Height	Area	Comment
	1 cell(1, 1)	302068	0	0	None	10	9.91	10	2.18	4.75	51	1	1.63	30492	453	1053	132	231	30492
	1 cell(2, 1)	304983	0	0	None	10	9.93	10	3.42	11.7	189	3	1.65	30723	585	1053	133	231	30723
	1 cell(3, 1)	407078	0	0	None	10	13.35	10	12.08	145.9	114	2	2.2	30492	718	1053	132	231	30492
	1 cell(4, 1)	668517	0	0	None	12	21.92	10	29.39	863.77	219	3	3.61	30492	850	1053	132	231	30492
	1 cell(5, 1)	933301	0	0	None	14	30.38	11	42.94	1843.95	255	4	5.03	30723	982	1053	133	231	30723
	1 cell(6, 1)	1087928	0	0	None	16	35.68	11	49.23	2423.34	255	3	5.87	30492	1115	1053	132	231	30492
	1 cell(7, 1)	1186536	0	0	None	17	38.91	12	52.37	2743.13	255	4	6.4	30492	1247	1053	132	231	30492
	1 cell(8, 1)	1233491	0	0	None	17	40.45	12	54.4	2959.4	255	4	6.65	30492	1379	1053	132	231	30492
	1 cell(9, 1)	1339047	0	0	None	18	43.58	12	56.53	3195.96	255	4	7.22	30723	1511	1053	133	231	30723
	1 cell(10, 1)	1458701	0	0	None	21	47.84	12	57.84	3345.27	255	5	7.87	30492	1644	1053	132	231	30492
	2 cell(1, 1)	1538851	0	0	None	15	37.53	12	55.8	3113.65	255	4	8.3	41001	449	1442	136	306	41001
	2 cell(2, 1)	1529025	0	0	None	16	37.29	12	55.18	3045.24	255	2	8.25	41001	582	1442	136	306	41001
	2 cell(3, 1)	1463967	0	0	None	16	35.7	12	52.36	2741.6	255	4	7.9	41004	715	1441	136	307	41004
	2 cell(4, 1)	1159893	0	0	None	16	28.29	12	38.51	1483.26	255	5	6.26	41001	848	1441	136	306	41001
	2 cell(5, 1)	971735	0	0	None	16	23.7	14	26.32	692.92	180	3	5.24	41004	981	1440	136	307	41004
	2 cell(6, 1)	793226	0	0	None	15	19.49	14	16.03	257.11	137	5	4.28	40698	1113	1439	135	307	40698
	2 cell(7, 1)	640653	0	0	None	14	15.63	12	7.79	60.64	99	5	3.46	41001	1246	1439	136	306	41001
	2 cell(8, 1)	581794	0	0	None	13	14.19	12	5.93	35.21	55	3	3.14	41004	1379	1438	136	307	41004
	2 cell(9, 1)	489203	0	0	None	12	11.93	11	2.91	8.47	27	3	2.64	41001	1512	1438	136	306	41001
	2 cell(10, 1)	449395	0	0	None	11	10.96	11	2.4	5.78	31	2	2.42	41006	1645	1437	136	308	41006

## Sheet: Fraction Bound
	Name	Volume	Less Backg.	Fract. Bound	[C]
BOUND	1 cell(1, 1)	302068	0	0	0
	1 cell(2, 1)	304983	2915	0.00258946	1.2e-08
	1 cell(3, 1)	407078	105010	0.0903116	3.7e-08
	1 cell(4, 1)	668517	366449	0.327152	6.4e-08
	1 cell(5, 1)	933301	631233	0.527459	1.1e-07
	1 cell(6, 1)	1087928	785860	0.670037	1.5e-07
	1 cell(7, 1)	1186536	884468	0.790482	1.9e-07
	1 cell(8, 1)	1233491	931423	0.8414	2.5e-07
	1 cell(9, 1)	1339047	1036979	0.925909	4.4e-07
	1 cell(10, 1)	1458701	1156633	0.964019	7.6e-07
	MIN	302068
FREE	2 cell(1, 1)	1538851	1.13263e+06
	2 cell(2, 1)	1529025	1.1228e+06
	2 cell(3, 1)	1463967	1.05774e+06
	2 cell(4, 1)	1159893	753668
	2 cell(5, 1)	971735	565510
	2 cell(6, 1)	793226	387001
	2 cell(7, 1)	640653	234428
	2 cell(8, 1)	581794	175569
	2 cell(9, 1)	489203	82978.4
	2 cell(10, 1)	449395	43170.4
	MIN
	Area Free	41006
	Area Bound	30492
	Back. Free	406225
