# Supplementary material for: A novel single alpha-helix DNA-binding domain in CAF-1 promotes gene silencing and DNA damage survival through tetrasome-length DNA selectivity and spacer function
Source: eLife journal article supplement (doi:10.7554/elife.83538), 2023-06-14
Supplement: fig1-data1 [file 210921 Cy5 50bp EMSA with yCAF1 WT_Table.xlsx]

## Sheet: 210921 Cy5 50bp EMSA with yCAF1
	Name	Volume	Background	Background Level	Background Type	Median Intensity	Average Intensity	Mode Intensity	Std Dev	Variance	Min Intensity	Max Intensity	Percent	Area > Background	Centre X	Centre Y	Width	Height	Area	Comment
	1 cell(1, 1)	268759	0	0	None	8	7.6	7	1.55	2.41	20	1	1.92	35376	406	1083	134	264	35376
	1 cell(2, 1)	268209	0	0	None	8	7.58	7	1.46	2.14	16	1	1.91	35376	540	1083	134	264	35376
	1 cell(3, 1)	264115	0	0	None	7	7.47	7	1.45	2.1	14	2	1.88	35376	674	1083	134	264	35376
	1 cell(4, 1)	322061	0	0	None	8	9.1	7	4.87	23.69	58	3	2.3	35376	808	1083	134	264	35376
	1 cell(5, 1)	454768	0	0	None	9	12.76	9	13.71	187.95	150	3	3.24	35640	942	1083	135	264	35640
	1 cell(6, 1)	669267	0	0	None	10	18.92	9	25.05	627.35	199	3	4.77	35376	1077	1083	134	264	35376
	1 cell(7, 1)	742907	0	0	None	11	21	9	28.41	807.32	212	3	5.3	35376	1211	1083	134	264	35376
	1 cell(8, 1)	989487	0	0	None	13	27.97	9	38.85	1509.46	255	3	7.05	35376	1345	1083	134	264	35376
	1 cell(9, 1)	1108079	0	0	None	13	31.32	9	46.58	2169.96	255	3	7.9	35376	1479	1083	134	264	35376
	1 cell(10, 1)	1243221	0	0	None	12	35.14	9	53.2	2830.27	255	2	8.86	35376	1613	1083	134	264	35376
	2 cell(1, 1)	1137528	0	0	None	13	45.49	9	66.05	4362.84	255	4	8.11	25004	414	1480	133	188	25004
	2 cell(2, 1)	1145720	0	0	None	13	46.17	9	66.59	4434.85	255	4	8.17	24816	547	1480	132	188	24816
	2 cell(3, 1)	1078735	0	0	None	13	43.14	11	61.72	3809.73	255	3	7.69	25004	679	1480	133	188	25004
	2 cell(4, 1)	1081974	0	0	None	15	43.6	11	61.63	3797.89	255	5	7.71	24816	812	1480	132	188	24816
	2 cell(5, 1)	931471	0	0	None	15	37.25	11	51.75	2678.25	255	5	6.64	25004	944	1480	133	188	25004
	2 cell(6, 1)	736560	0	0	None	14	29.46	11	38.49	1481.6	230	5	5.25	25004	1077	1480	133	188	25004
	2 cell(7, 1)	641637	0	0	None	13	25.86	9	33.51	1123.12	199	3	4.57	24816	1210	1480	132	188	24816
	2 cell(8, 1)	419083	0	0	None	11	16.76	9	14.69	215.78	96	4	2.99	25004	1342	1480	133	188	25004
	2 cell(9, 1)	305613	0	0	None	11	12.32	9	6.03	36.3	43	4	2.18	24816	1475	1480	132	188	24816
	2 cell(10, 1)	220662	0	0	None	9	8.83	9	1.93	3.73	18	3	1.57	25004	1607	1480	133	188	25004

## Sheet: Fraction Bound
	Name	Volume	Less Backg.	Fract. Bound	[C]
BOUND	1 cell(1, 1)	268759	4644	0.00486031	0
	1 cell(2, 1)	268209	4094	0.0042507	5e-09
	1 cell(3, 1)	264115	0	0	1.2e-08
	1 cell(4, 1)	322061	57946	0.0607884	2.1e-08
	1 cell(5, 1)	454768	190653	0.20381	3.7e-08
	1 cell(6, 1)	669267	405152	0.424228	4.9e-08
	1 cell(7, 1)	742907	478792	0.512762	6.4e-08
	1 cell(8, 1)	989487	725372	0.75735	1.1e-07
	1 cell(9, 1)	1108079	843964	0.876483	1.5e-07
	1 cell(10, 1)	1243221	979106	0.966455	2.5e-07
	MIN	264115
FREE	2 cell(1, 1)	1137528	950850
	2 cell(2, 1)	1145720	959042
	2 cell(3, 1)	1078735	892057
	2 cell(4, 1)	1081974	895296
	2 cell(5, 1)	931471	744793
	2 cell(6, 1)	736560	549882
	2 cell(7, 1)	641637	454959
	2 cell(8, 1)	419083	232405
	2 cell(9, 1)	305613	118935
	2 cell(10, 1)	220662	33983.7
	MIN
	Area Free	25004
	Area Bound	35376
	Back. Free	186678
