# Supplementary material for: A novel single alpha-helix DNA-binding domain in CAF-1 promotes gene silencing and DNA damage survival through tetrasome-length DNA selectivity and spacer function
Source: eLife journal article supplement (doi:10.7554/elife.83538), 2023-06-14
Supplement: fig1-data1 [file 210921 Cy5 80bp EMSA with yCAF1 WT_Table.xlsx]

## Sheet: 210921 Cy5 80bp EMSA with yCAF1
	Name	Volume	Background	Background Level	Background Type	Median Intensity	Average Intensity	Mode Intensity	Std Dev	Variance	Min Intensity	Max Intensity	Percent	Area > Background	Centre X	Centre Y	Width	Height	Area	Comment
	1 cell(1, 1)	307032	0	0	None	8	8.46	8	2.32	5.39	129	1	2.16	36309	513	1166	133	273	36309
	1 cell(2, 1)	304244	0	0	None	8	8.38	8	1.77	3.13	39	2	2.14	36309	646	1166	133	273	36309
	1 cell(3, 1)	318788	0	0	None	9	8.71	8	1.84	3.38	20	2	2.24	36582	780	1166	134	273	36582
	1 cell(4, 1)	518292	0	0	None	10	14.27	10	12.48	155.81	122	3	3.65	36309	913	1166	133	273	36309
	1 cell(5, 1)	661913	0	0	None	11	18.23	10	20.81	433.09	197	3	4.66	36309	1046	1166	133	273	36309
	1 cell(6, 1)	840107	0	0	None	13	23.14	10	28.09	789.18	215	4	5.91	36309	1179	1166	133	273	36309
	1 cell(7, 1)	950264	0	0	None	14	26.17	10	32.49	1055.63	255	2	6.69	36309	1312	1166	133	273	36309
	1 cell(8, 1)	1107772	0	0	None	16	30.28	10	43.46	1888.71	255	3	7.8	36582	1446	1166	134	273	36582
	1 cell(9, 1)	1172732	0	0	None	13	32.3	10	47.84	2288.52	255	4	8.26	36309	1579	1166	133	273	36309
	1 cell(10, 1)	1144135	0	0	None	13	31.51	10	47.24	2231.75	255	3	8.05	36309	1712	1166	133	273	36309
	2 cell(1, 1)	1122808	0	0	None	15	45.05	12	61.93	3834.79	255	4	7.9	24924	508	1524	134	186	24924
	2 cell(2, 1)	1133096	0	0	None	15	45.46	12	60.53	3663.93	255	4	7.98	24924	642	1524	134	186	24924
	2 cell(3, 1)	1087482	0	0	None	15	43.96	12	58.04	3368.62	255	4	7.66	24738	775	1524	133	186	24738
	2 cell(4, 1)	882083	0	0	None	15	35.39	12	42.12	1773.91	200	5	6.21	24924	909	1524	134	186	24924
	2 cell(5, 1)	786456	0	0	None	15	31.55	12	36.68	1345.17	209	5	5.54	24924	1043	1524	134	186	24924
	2 cell(6, 1)	583569	0	0	None	13	23.41	10	23.99	575.63	124	4	4.11	24924	1177	1524	134	186	24924
	2 cell(7, 1)	484316	0	0	None	13	19.43	10	16.98	288.35	91	3	3.41	24924	1311	1524	134	186	24924
	2 cell(8, 1)	292815	0	0	None	11	11.84	10	3.95	15.58	32	3	2.06	24738	1444	1524	133	186	24738
	2 cell(9, 1)	263804	0	0	None	10	10.58	10	2.46	6.04	20	3	1.86	24924	1578	1524	134	186	24924
	2 cell(10, 1)	243187	0	0	None	10	9.76	10	1.96	3.86	17	1	1.71	24924	1712	1524	134	186	24924

## Sheet: Fraction Bound
	Name	Volume	Less Backg.	Fract. Bound	[C]
BOUND	1 cell(1, 1)	307032	2788	0.00304118	0
	1 cell(2, 1)	304244	0	0	5e-09
	1 cell(3, 1)	318788	14544	0.0162834	1.2e-08
	1 cell(4, 1)	518292	214048	0.241239	2.1e-08
	1 cell(5, 1)	661913	357669	0.382419	3.7e-08
	1 cell(6, 1)	840107	535863	0.588481	4.9e-08
	1 cell(7, 1)	950264	646020	0.70106	6.4e-08
	1 cell(8, 1)	1107772	803528	0.905386	1.1e-07
	1 cell(9, 1)	1172732	868488	0.940486	1.5e-07
	1 cell(10, 1)	1144135	839891	0.960718	2.5e-07
	MIN	304244
FREE	2 cell(1, 1)	1122808	913962
	2 cell(2, 1)	1133096	924250
	2 cell(3, 1)	1087482	878636
	2 cell(4, 1)	882083	673237
	2 cell(5, 1)	786456	577610
	2 cell(6, 1)	583569	374723
	2 cell(7, 1)	484316	275470
	2 cell(8, 1)	292815	83969.3
	2 cell(9, 1)	263804	54958.3
	2 cell(10, 1)	243187	34341.3
	MIN	243187
	Area Free	24924
	Area Bound	36309
	Back. Free	208846
