# Supplementary material for: A novel single alpha-helix DNA-binding domain in CAF-1 promotes gene silencing and DNA damage survival through tetrasome-length DNA selectivity and spacer function
Source: eLife journal article supplement (doi:10.7554/elife.83538), 2023-06-14
Supplement: fig1-data1 [file 211001 Cy5 30 bp EMSA with yCAF1 WT_Table.xlsx]

## Sheet: 211001 Cy5 30 bp EMSA with yCAF
	Name	Volume	Background	Background Level	Background Type	Median Intensity	Average Intensity	Mode Intensity	Std Dev	Variance	Min Intensity	Max Intensity	Percent	Area > Background	Centre X	Centre Y	Width	Height	Area	Comment
	1 cell(1, 1)	1259068	0	0	None	45	44.5	45	7.46	55.62	75	16	2.29	28296	575	1064	131	216	28296
	1 cell(2, 1)	1246923	0	0	None	44	44.07	44	7.52	56.58	167	12	2.27	28296	706	1064	131	216	28296
	1 cell(3, 1)	1249692	0	0	None	44	44.16	45	7.51	56.39	196	15	2.27	28296	837	1064	131	216	28296
	1 cell(4, 1)	1277452	0	0	None	45	45.15	45	7.7	59.34	196	14	2.32	28296	968	1064	131	216	28296
	1 cell(5, 1)	1315540	0	0	None	46	46.14	46	7.59	57.56	93	16	2.39	28512	1100	1064	132	216	28512
	1 cell(6, 1)	1467337	0	0	None	50	51.86	48	11.07	122.57	108	18	2.67	28296	1231	1064	131	216	28296
	1 cell(7, 1)	1612971	0	0	None	52	57	48	19.18	367.74	173	15	2.93	28296	1362	1064	131	216	28296
	1 cell(8, 1)	1943353	0	0	None	57	68.68	45	35.54	1263.02	272	15	3.53	28296	1493	1064	131	216	28296
	1 cell(9, 1)	2411760	0	0	None	67	85.23	51	53	2808.59	422	18	4.38	28296	1624	1064	131	216	28296
	1 cell(10, 1)	2966784	0	0	None	83	104.85	51	75.41	5686.86	547	16	5.39	28296	1755	1064	131	216	28296
	2 cell(1, 1)	4265610	0	0	None	52	101.62	49	147.34	21708.4	899	17	7.75	41976	567	1388	132	320	41976
	2 cell(2, 1)	4445674	0	0	None	54	106.72	49	170.33	29013.3	1145	18	8.08	41658	698	1389	131	319	41658
	2 cell(3, 1)	4273920	0	0	None	52	101.82	50	138.21	19103.1	846	20	7.77	41976	830	1391	132	320	41976
	2 cell(4, 1)	4319804	0	0	None	56	102.91	50	136.3	18576.6	931	23	7.85	41976	962	1392	132	319	41976
	2 cell(5, 1)	4486530	0	0	None	56	106.88	50	148.56	22071.4	1006	21	8.15	41976	1094	1394	132	320	41976
	2 cell(6, 1)	4042654	0	0	None	64	97.04	51	96.55	9322.85	683	22	7.35	41658	1225	1395	131	319	41658
	2 cell(7, 1)	3857711	0	0	None	65	91.9	50	78.73	6197.87	579	21	7.01	41976	1357	1397	132	320	41976
	2 cell(8, 1)	3394736	0	0	None	70	80.87	48	49.68	2468.59	385	12	6.17	41976	1489	1398	132	319	41976
	2 cell(9, 1)	2718225	0	0	None	63	65.25	48	22.83	521.06	210	12	4.94	41659	1620	1400	131	320	41659
	2 cell(10, 1)	2460996	0	0	None	57	58.63	49	16.57	274.47	151	8	4.47	41976	1752	1401	132	319	28296

## Sheet: Fraction Bound
	Name	Volume	Less Backg.	Fract. Bound	[C]
BOUND	1 cell(1, 1)	1259068	12145	0.00400715	0
	1 cell(2, 1)	1246923	0	0	1.2e-08
	1 cell(3, 1)	1249692	2769	0.000913932	3.7e-08
	1 cell(4, 1)	1277452	30529	0.00983724	6.4e-08
	1 cell(5, 1)	1315540	68617	0.0207413	1.1e-07
	1 cell(6, 1)	1467337	220414	0.0730781	1.5e-07
	1 cell(7, 1)	1612971	366048	0.122965	1.9e-07
	1 cell(8, 1)	1943353	696430	0.244856	2.5e-07
	1 cell(9, 1)	2411760	1164837	0.441872	4.4e-07
	1 cell(10, 1)	2966784	1719861	0.586196	7.6e-07
	MIN	1246923
FREE	2 cell(1, 1)	4265610	3018687
	2 cell(2, 1)	4445674	3198751
	2 cell(3, 1)	4273920	3026997
	2 cell(4, 1)	4319804	3072881
	2 cell(5, 1)	4486530	3239607
	2 cell(6, 1)	4042654	2795731
	2 cell(7, 1)	3857711	2610788
	2 cell(8, 1)	3394736	2147813
	2 cell(9, 1)	2718225	1471302
	2 cell(10, 1)	2460996	1214073
	MIN
	Area Free	28296
	Area Bound	28296
	Back. Free	1246923
