# Supplementary material for: A novel single alpha-helix DNA-binding domain in CAF-1 promotes gene silencing and DNA damage survival through tetrasome-length DNA selectivity and spacer function
Source: eLife journal article supplement (doi:10.7554/elife.83538), 2023-06-14
Supplement: fig1-data1 [file 211001 Cy5 40 bp EMSA with yCAF1 WT_Table.xlsx]

## Sheet: 211001 Cy5 40 bp EMSA with yCAF
	Name	Volume	Background	Background Level	Background Type	Median Intensity	Average Intensity	Mode Intensity	Std Dev	Variance	Min Intensity	Max Intensity	Percent	Area > Background	Centre X	Centre Y	Width	Height	Area	Comment
	1 cell(1, 1)	1585363	0	0	None	45	45.49	45	7.99	63.8	92	12	1.84	34848	444	1099	132	264	34848
	1 cell(2, 1)	1572682	0	0	None	45	45.47	46	8.84	78.23	102	15	1.83	34584	575	1099	131	265	34584
	1 cell(3, 1)	1990344	0	0	None	48	57.12	48	39.2	1536.54	407	11	2.32	34848	707	1100	132	264	34848
	1 cell(4, 1)	2825201	0	0	None	53	81.07	48	93.67	8773.75	932	16	3.29	34848	839	1100	132	264	34848
	1 cell(5, 1)	4034252	0	0	None	59	115.77	49	157.42	24780.2	1168	18	4.69	34848	971	1100	132	265	34848
	1 cell(6, 1)	5131766	0	0	None	63	148.39	49	227.82	51903.9	2387	22	5.97	34584	1102	1101	131	264	34584
	1 cell(7, 1)	5574111	0	0	None	63	159.95	50	266.48	71013.4	2363	19	6.48	34848	1234	1101	132	264	34848
	1 cell(8, 1)	5892881	0	0	None	62	169.1	51	297.93	88762.8	2706	17	6.86	34848	1366	1101	132	264	34848
	1 cell(9, 1)	6369890	0	0	None	65	184.19	52	324.01	104983	2921	15	7.41	34584	1497	1101	131	265	34584
	1 cell(10, 1)	6919308	0	0	None	67	198.56	51	332.63	110641	2865	23	8.05	34848	1629	1102	132	264	34848
	2 cell(1, 1)	7138952	0	0	None	56	152.52	48	287.72	82782.9	2006	10	8.3	46806	443	1482	137	360	46806
	2 cell(2, 1)	6981278	0	0	None	57	150.33	50	281.92	79479.1	2025	17	8.12	46440	574	1481	136	361	46440
	2 cell(3, 1)	6270212	0	0	None	61	134	52	231.61	53642.8	1701	22	7.29	46793	704	1480	137	362	46793
	2 cell(4, 1)	5386970	0	0	None	66	116	54	164.34	27006	1260	17	6.27	46440	835	1478	136	361	46440
	2 cell(5, 1)	4415466	0	0	None	65	94.35	56	106.25	11289	844	22	5.14	46800	965	1477	137	361	46800
	2 cell(6, 1)	3436629	0	0	None	61	74	54	48.8	2381.36	439	21	4	46440	1096	1476	136	361	46440
	2 cell(7, 1)	2911852	0	0	None	58	62.7	53	21.6	466.73	206	19	3.39	46440	1226	1475	136	361	46440
	2 cell(8, 1)	2732254	0	0	None	55	58.39	52	16.53	273.23	160	18	3.18	46793	1356	1474	137	362	46793
	2 cell(9, 1)	2433666	0	0	None	52	52	51	9.54	91.02	221	16	2.83	46800	1487	1472	137	361	46800
	2 cell(10, 1)	2357693	0	0	None	50	50.78	50	11.13	123.89	430	17	2.74	46434	1618	1471	136	362	46434

## Sheet: Fraction Bound
	Name	Volume	Less Backg.	Fract. Bound	[C]
BOUND	1 cell(1, 1)	1585363	12681	0.00251603	0
	1 cell(2, 1)	1572682	0	0	1.2e-08
	1 cell(3, 1)	1990344	417662	0.0912659	3.7e-08
	1 cell(4, 1)	2825201	1252519	0.27662	6.4e-08
	1 cell(5, 1)	4034252	2461570	0.516541	1.1e-07
	1 cell(6, 1)	5131766	3559084	0.728699	1.5e-07
	1 cell(7, 1)	5574111	4001429	0.833331	1.9e-07
	1 cell(8, 1)	5892881	4320199	0.874375	2.5e-07
	1 cell(9, 1)	6369890	4797208	0.937079	4.4e-07
	1 cell(10, 1)	6919308	5346626	0.955989	7.6e-07
	MIN	1572682
FREE	2 cell(1, 1)	7138952	5.0274e+06
	2 cell(2, 1)	6981278	4.86973e+06
	2 cell(3, 1)	6270212	4.15866e+06
	2 cell(4, 1)	5386970	3.27542e+06
	2 cell(5, 1)	4415466	2.30391e+06
	2 cell(6, 1)	3436629	1.32508e+06
	2 cell(7, 1)	2911852	800300
	2 cell(8, 1)	2732254	620702
	2 cell(9, 1)	2433666	322114
	2 cell(10, 1)	2357693	246141
	MIN
	Area Free	46434
	Area Bound	34584
	Back. Free	2.11155e+06
