# Supplementary material for: A novel single alpha-helix DNA-binding domain in CAF-1 promotes gene silencing and DNA damage survival through tetrasome-length DNA selectivity and spacer function
Source: eLife journal article supplement (doi:10.7554/elife.83538), 2023-06-14
Supplement: fig1-data1 [file 211001 Cy5 50 bp EMSA with yCAF1 WT_Table.xlsx]

## Sheet: 211001 Cy5 50 bp EMSA with yCAF
	Name	Volume	Background	Background Level	Background Type	Median Intensity	Average Intensity	Mode Intensity	Std Dev	Variance	Min Intensity	Max Intensity	Percent	Area > Background	Centre X	Centre Y	Width	Height	Area	Comment
	1 cell(1, 1)	1489230	0	0	None	45	44.92	44	7.88	62.08	78	10	1.86	33153	481	1026	134	255	33153
	1 cell(2, 1)	1451429	0	0	None	44	44.12	42	7.66	58.72	82	15	1.81	32898	611	1026	133	255	32898
	1 cell(3, 1)	1511696	0	0	None	45	45.6	46	8.79	77.27	116	12	1.89	33153	742	1026	134	255	33153
	1 cell(4, 1)	2066826	0	0	None	50	62.83	46	53.89	2904.34	626	15	2.58	32898	872	1026	133	255	32898
	1 cell(5, 1)	2328667	0	0	None	51	70.25	47	72.73	5289.25	853	15	2.91	33150	1003	1026	134	256	33150
	1 cell(6, 1)	3122365	0	0	None	56	94.91	49	128.88	16610.1	1436	19	3.9	32898	1133	1025	133	255	32898
	1 cell(7, 1)	3393025	0	0	None	56	103.14	47	147.88	21869.4	1526	17	4.24	32898	1263	1025	133	255	32898
	1 cell(8, 1)	4816463	0	0	None	67	145.28	48	213.02	45375.6	2096	21	6.02	33153	1394	1025	134	255	33153
	1 cell(9, 1)	5791988	0	0	None	71	174.72	50	316.42	100119	3136	23	7.24	33150	1525	1025	134	256	33150
	1 cell(10, 1)	6600796	0	0	None	68	200.66	51	323.19	104451	2579	20	8.25	32895	1655	1024	133	256	32895
	2 cell(1, 1)	6558676	0	0	None	62	191.1	52	305.12	93096	1717	18	8.19	34320	482	1354	130	264	34320
	2 cell(2, 1)	6905681	0	0	None	64	201.21	54	315.53	99559	1760	18	8.63	34320	612	1354	130	264	34320
	2 cell(3, 1)	6416772	0	0	None	64	185.54	56	284.74	81074.8	1683	19	8.02	34584	742	1354	131	264	34584
	2 cell(4, 1)	5703840	0	0	None	64	166.2	56	243.13	59110.7	1422	23	7.13	34320	873	1354	130	264	34320
	2 cell(5, 1)	5616248	0	0	None	65	163.64	55	228.65	52279.8	1352	23	7.02	34320	1003	1353	130	265	34320
	2 cell(6, 1)	4717521	0	0	None	66	137.46	58	170.93	29217.5	1035	26	5.89	34320	1133	1353	130	264	34320
	2 cell(7, 1)	4441104	0	0	None	66	129.4	53	159.13	25323.1	1012	26	5.55	34320	1263	1353	130	264	34320
	2 cell(8, 1)	3045665	0	0	None	61	88.07	49	77.92	6070.84	510	25	3.81	34584	1393	1353	131	264	34584
	2 cell(9, 1)	2297423	0	0	None	57	66.94	53	34.25	1173.39	281	17	2.87	34320	1524	1352	130	265	34320
	2 cell(10, 1)	1758201	0	0	None	50	51.23	49	9.51	90.4	131	18	2.2	34320	1654	1351	130	265	34320

## Sheet: Fraction Bound
	Name	Volume	Less Backg.	Fract. Bound	[C]
BOUND	1 cell(1, 1)	1489230	37801	0.00743776	0
	1 cell(2, 1)	1451429	0	0	5e-09
	1 cell(3, 1)	1511696	60267	0.0121436	1.2e-08
	1 cell(4, 1)	2066826	615397	0.128072	2.1e-08
	1 cell(5, 1)	2328667	877238	0.176176	3.7e-08
	1 cell(6, 1)	3122365	1670936	0.342806	4.9e-08
	1 cell(7, 1)	3393025	1941596	0.398805	6.4e-08
	1 cell(8, 1)	4816463	3365034	0.687228	1.1e-07
	1 cell(9, 1)	5791988	4340559	0.847134	1.5e-07
	1 cell(10, 1)	6600796	5149367	0.954753	2.5e-07
	MIN	1451429
FREE	2 cell(1, 1)	6558676	5.04451e+06
	2 cell(2, 1)	6905681	5.39151e+06
	2 cell(3, 1)	6416772	4.90261e+06
	2 cell(4, 1)	5703840	4.18967e+06
	2 cell(5, 1)	5616248	4.10208e+06
	2 cell(6, 1)	4717521	3.20335e+06
	2 cell(7, 1)	4441104	2.92694e+06
	2 cell(8, 1)	3045665	1.5315e+06
	2 cell(9, 1)	2297423	783257
	2 cell(10, 1)	1758201	244035
	MIN
	Area Free	34320
	Area Bound	32898
	Back. Free	1.51417e+06
