# Supplementary material for: A novel single alpha-helix DNA-binding domain in CAF-1 promotes gene silencing and DNA damage survival through tetrasome-length DNA selectivity and spacer function
Source: eLife journal article supplement (doi:10.7554/elife.83538), 2023-06-14
Supplement: fig1-data1 [file 211001 Cy5 80 bp EMSA with yCAF1 WT_Table.xlsx]

## Sheet: 211001 Cy5 80 bp EMSA with yCAF
	Name	Volume	Background	Background Level	Background Type	Median Intensity	Average Intensity	Mode Intensity	Std Dev	Variance	Min Intensity	Max Intensity	Percent	Area > Background	Centre X	Centre Y	Width	Height	Area	Comment
	1 cell(1, 1)	1612549	0	0	None	47	46.81	45	8.36	69.95	85	13	2.25	34449	460	1012	134	261	34449
	1 cell(2, 1)	1600666	0	0	None	46	46.11	46	8.4	70.55	83	10	2.24	34713	591	1012	135	262	34713
	1 cell(3, 1)	1669186	0	0	None	47	48.45	46	11.05	122.15	298	14	2.33	34452	723	1011	134	262	34452
	1 cell(4, 1)	2379440	0	0	None	53	68.55	50	54.1	2926.41	553	17	3.33	34713	854	1010	135	262	34713
	1 cell(5, 1)	2406069	0	0	None	53	69.84	50	58.69	3444	626	16	3.36	34452	986	1009	134	262	34452
	1 cell(6, 1)	3201847	0	0	None	59	92.94	48	101.29	10258.9	935	19	4.48	34449	1117	1008	134	261	34449
	1 cell(7, 1)	3969182	0	0	None	63	114.34	46	136.65	18673.7	1177	20	5.55	34713	1248	1008	135	262	34713
	1 cell(8, 1)	4994185	0	0	None	73	144.96	47	186.14	34647.9	1795	17	6.98	34452	1380	1007	134	262	34452
	1 cell(9, 1)	5878076	0	0	None	72	169.33	51	277.06	76760.7	2385	13	8.22	34713	1511	1006	135	262	34713
	1 cell(10, 1)	5885491	0	0	None	61	170.82	49	311.09	96779.5	3229	18	8.23	34454	1643	1004	134	263	34454
	2 cell(1, 1)	5687525	0	0	None	69	203.83	53	297.16	88301.6	1656	20	7.95	27903	461	1293	131	213	27903
	2 cell(2, 1)	5613941	0	0	None	68	202.74	53	316.85	100395	1778	20	7.85	27690	592	1293	130	213	27690
	2 cell(3, 1)	5528689	0	0	None	69	198.14	58	313.38	98208.4	1771	23	7.73	27903	722	1293	131	213	27903
	2 cell(4, 1)	4798930	0	0	None	66	173.31	53	260.68	67954.2	1476	26	6.71	27690	853	1293	130	213	27690
	2 cell(5, 1)	4577395	0	0	None	66	164.05	57	238.72	56987.4	1373	25	6.4	27903	983	1293	131	213	27903
	2 cell(6, 1)	3896432	0	0	None	66	140.72	57	182.14	33173.2	1031	23	5.45	27690	1114	1293	130	213	27690
	2 cell(7, 1)	3025613	0	0	None	64	109.27	52	117.73	13859.6	659	23	4.23	27690	1244	1293	130	213	27690
	2 cell(8, 1)	1997686	0	0	None	58	71.59	55	42.55	1810.74	299	21	2.79	27903	1374	1293	131	213	27903
	2 cell(9, 1)	1506304	0	0	None	52	53.98	52	12.37	152.92	123	15	2.11	27903	1505	1293	131	213	27903
	2 cell(10, 1)	1316284	0	0	None	47	47.54	48	8.19	67.1	86	15	1.84	27690	1636	1293	130	213	27690

## Sheet: Fraction Bound
	Name	Volume	Less Backg.	Fract. Bound	[C]
BOUND	1 cell(1, 1)	1612549	11883	0.00268689	0
	1 cell(2, 1)	1600666	0	0	5e-09
	1 cell(3, 1)	1669186	68520	0.0158597	1.2e-08
	1 cell(4, 1)	2379440	778774	0.181073	2.1e-08
	1 cell(5, 1)	2406069	805403	0.196154	3.7e-08
	1 cell(6, 1)	3201847	1601181	0.379356	4.9e-08
	1 cell(7, 1)	3969182	2368516	0.575259	6.4e-08
	1 cell(8, 1)	4994185	3393519	0.824795	1.1e-07
	1 cell(9, 1)	5878076	4277410	0.949083	1.5e-07
	1 cell(10, 1)	5885491	4284825	0.990875	2.5e-07
	MIN	1600666
FREE	2 cell(1, 1)	5687525	4.4107e+06
	2 cell(2, 1)	5613941	4.33712e+06
	2 cell(3, 1)	5528689	4.25186e+06
	2 cell(4, 1)	4798930	3.5221e+06
	2 cell(5, 1)	4577395	3.30057e+06
	2 cell(6, 1)	3896432	2.61961e+06
	2 cell(7, 1)	3025613	1.74879e+06
	2 cell(8, 1)	1997686	720861
	2 cell(9, 1)	1506304	229479
	2 cell(10, 1)	1316284	39458.6
	MIN	1316284
	Area Free	27690
	Area Bound	34713
	Back. Free	1.27683e+06
