# Supplementary material for: A novel single alpha-helix DNA-binding domain in CAF-1 promotes gene silencing and DNA damage survival through tetrasome-length DNA selectivity and spacer function
Source: eLife journal article supplement (doi:10.7554/elife.83538), 2023-06-14
Supplement: fig1-data1 [file 211004 Cy5 30 bp EMSA with yCAF1 WT_Table.xlsx]

## Sheet: 211004 Cy5 30 bp EMSA with yCAF
	Name	Volume	Background	Background Level	Background Type	Median Intensity	Average Intensity	Mode Intensity	Std Dev	Variance	Min Intensity	Max Intensity	Percent	Area > Background	Centre X	Centre Y	Width	Height	Area	Comment
	1 cell(1, 1)	1996419	0	0	None	45	45.56	45	9.49	90.04	319	12	3.48	43824	514	1075	132	333	43824
	1 cell(2, 1)	1973036	0	0	None	45	44.68	44	7.97	63.44	223	16	3.44	44156	646	1076	133	333	44156
	1 cell(3, 1)	1982019	0	0	None	45	45.23	45	7.43	55.24	80	16	3.46	43824	779	1077	132	332	43824
	1 cell(4, 1)	2025017	0	0	None	46	45.86	46	7.31	53.39	74	14	3.53	44156	911	1077	133	333	44156
	1 cell(5, 1)	2047796	0	0	None	46	46.73	45	7.96	63.36	83	16	3.57	43824	1044	1078	132	333	43824
	1 cell(6, 1)	2157097	0	0	None	48	49.22	46	10.62	112.7	277	12	3.76	43824	1176	1079	132	333	43824
	1 cell(7, 1)	2313361	0	0	None	48	52.39	46	16.66	277.72	170	15	4.03	44156	1308	1080	133	333	44156
	1 cell(8, 1)	2408349	0	0	None	49	54.96	46	22.6	510.92	235	15	4.2	43824	1441	1081	132	332	43824
	1 cell(9, 1)	3096730	0	0	None	56	70.13	49	46.45	2157.99	851	16	5.4	44156	1573	1081	133	333	44156
	1 cell(10, 1)	3518689	0	0	None	62	80.29	48	62.03	3847.2	585	13	6.14	43824	1706	1082	132	333	43824
	2 cell(1, 1)	3578564	0	0	None	54	109.32	48	154.16	23764.2	934	20	6.24	32736	506	1473	132	248	32736
	2 cell(2, 1)	3846048	0	0	None	54	118.38	49	184.55	34057.8	1144	16	6.71	32488	637	1473	131	248	32488
	2 cell(3, 1)	3879146	0	0	None	55	118.5	48	179.78	32319.5	1156	20	6.76	32736	769	1473	132	248	32736
	2 cell(4, 1)	3786600	0	0	None	59	116.55	53	161.82	26186.2	1035	18	6.6	32488	900	1473	131	248	32488
	2 cell(5, 1)	3778888	0	0	None	61	115.44	54	152.28	23188.3	980	24	6.59	32736	1032	1473	132	248	32736
	2 cell(6, 1)	3501957	0	0	None	62	106.98	54	129.02	16645.5	865	26	6.11	32736	1164	1473	132	248	32736
	2 cell(7, 1)	3337488	0	0	None	64	102.73	55	113.62	12909.6	764	26	5.82	32488	1295	1473	131	248	32488
	2 cell(8, 1)	3229486	0	0	None	63	98.65	56	110.36	12180	764	23	5.63	32736	1427	1473	132	248	32736
	2 cell(9, 1)	2623492	0	0	None	66	80.75	53	56.81	3227.53	476	22	4.57	32488	1558	1473	131	248	32488
	2 cell(10, 1)	2273265	0	0	None	65	69.44	51	29.38	863.37	273	18	3.96	32736	1690	1473	132	248	32736

## Sheet: Fraction Bound
	Name	Volume	Less Backg.	Fract. Bound	[C]
BOUND	1 cell(1, 1)	1996419	23383	0.0109308	0
	1 cell(2, 1)	1973036	0	0	1.2e-08
	1 cell(3, 1)	1982019	8983	0.00370376	3.7e-08
	1 cell(4, 1)	2025017	51981	0.0218791	6.4e-08
	1 cell(5, 1)	2047796	74760	0.0312686	1.1e-07
	1 cell(6, 1)	2157097	184061	0.0827886	1.5e-07
	1 cell(7, 1)	2313361	340325	0.153641	1.9e-07
	1 cell(8, 1)	2408349	435313	0.197686	2.5e-07
	1 cell(9, 1)	3096730	1123694	0.491892	4.4e-07
	1 cell(10, 1)	3518689	1545653	0.656004	7.6e-07
	MIN	1973036
FREE	2 cell(1, 1)	3578564	2.11581e+06
	2 cell(2, 1)	3846048	2.3833e+06
	2 cell(3, 1)	3879146	2.41639e+06
	2 cell(4, 1)	3786600	2.32385e+06
	2 cell(5, 1)	3778888	2.31614e+06
	2 cell(6, 1)	3501957	2.0392e+06
	2 cell(7, 1)	3337488	1.87474e+06
	2 cell(8, 1)	3229486	1.76673e+06
	2 cell(9, 1)	2623492	1.16074e+06
	2 cell(10, 1)	2273265	810512
	MIN
	Area Free	32736
	Area Bound	44156
	Back. Free	1.46275e+06
