# Supplementary material for: A novel single alpha-helix DNA-binding domain in CAF-1 promotes gene silencing and DNA damage survival through tetrasome-length DNA selectivity and spacer function
Source: eLife journal article supplement (doi:10.7554/elife.83538), 2023-06-14
Supplement: fig1-data1 [file 211004 Cy5 40 bp EMSA with yCAF1 WT_Table.xlsx]

## Sheet: 211004 Cy5 40 bp EMSA with yCAF
	Name	Volume	Background	Background Level	Background Type	Median Intensity	Average Intensity	Mode Intensity	Std Dev	Variance	Min Intensity	Max Intensity	Percent	Area > Background	Centre X	Centre Y	Width	Height	Area	Comment
	1 cell(1, 1)	1176826	0	0	None	45	44.57	45	7.52	56.48	76	16	1.66	26404	560	1146	137	200	26404
	1 cell(2, 1)	1185778	0	0	None	45	44.91	45	7.36	54.12	90	15	1.67	26404	693	1146	137	200	26404
	1 cell(3, 1)	1834431	0	0	None	51	68.95	47	58.7	3445.51	525	21	2.59	26604	827	1146	138	200	26604
	1 cell(4, 1)	2613540	0	0	None	58	98.98	48	112.05	12554.7	764	19	3.68	26404	960	1146	137	200	26404
	1 cell(5, 1)	3994950	0	0	None	75	151.3	49	196.1	38454.3	1403	19	5.63	26404	1093	1146	137	200	26404
	1 cell(6, 1)	4501712	0	0	None	83	170.49	48	235.29	55362.6	1878	19	6.35	26404	1226	1146	137	200	26404
	1 cell(7, 1)	4822163	0	0	None	84	182.63	49	250.14	62570.5	1964	20	6.8	26404	1359	1146	137	200	26404
	1 cell(8, 1)	5210972	0	0	None	88	195.87	53	282.48	79797.4	2266	21	7.35	26604	1493	1146	138	200	26604
	1 cell(9, 1)	5518289	0	0	None	97	208.99	53	296.97	88191.2	2309	24	7.78	26404	1626	1146	137	200	26404
	1 cell(10, 1)	5908536	0	0	None	114	223.77	55	291.86	85184.8	2228	21	8.33	26404	1759	1146	137	200	26404
	2 cell(1, 1)	5525052	0	0	None	63	153.88	51	245.17	60105.9	1564	20	7.79	35904	540	1572	136	264	35904
	2 cell(2, 1)	5604080	0	0	None	66	157.24	54	242.78	58941.3	1580	17	7.9	35640	675	1572	135	264	35640
	2 cell(3, 1)	4830271	0	0	None	71	134.53	56	182.62	33349.5	1159	21	6.81	35904	811	1572	136	264	35904
	2 cell(4, 1)	4087905	0	0	None	71	114.7	55	134	17956.8	877	25	5.76	35640	946	1572	135	264	35640
	2 cell(5, 1)	2988365	0	0	None	66	83.23	59	57.82	3343.34	456	25	4.21	35904	1082	1572	136	264	35904
	2 cell(6, 1)	2626014	0	0	None	62	73.14	56	39.87	1589.43	328	22	3.7	35904	1218	1572	136	264	35904
	2 cell(7, 1)	2370663	0	0	None	59	66.52	54	25.87	669.39	215	16	3.34	35640	1353	1572	135	264	35640
	2 cell(8, 1)	2137152	0	0	None	56	59.52	52	16.21	262.92	157	22	3.01	35904	1489	1572	136	264	35904
	2 cell(9, 1)	2019480	0	0	None	56	56.66	53	11.42	130.49	113	16	2.85	35640	1624	1572	135	264	35640
	2 cell(10, 1)	1977131	0	0	None	55	55.07	54	9.98	99.61	100	16	2.79	35904	1760	1572	136	264	35904

## Sheet: Fraction Bound
	Name	Volume	Less Backg.	Fract. Bound	[C]
BOUND	1 cell(1, 1)	1176826	0	0	0
	1 cell(2, 1)	1185778	8952	0.00223087	1.2e-08
	1 cell(3, 1)	1834431	657605	0.169153	3.7e-08
	1 cell(4, 1)	2613540	1436714	0.3661	6.4e-08
	1 cell(5, 1)	3994950	2818124	0.669985	1.1e-07
	1 cell(6, 1)	4501712	3324886	0.764226	1.5e-07
	1 cell(7, 1)	4822163	3645337	0.825529	1.9e-07
	1 cell(8, 1)	5210972	4034146	0.882541	2.5e-07
	1 cell(9, 1)	5518289	4341463	0.911938	4.4e-07
	1 cell(10, 1)	5908536	4731710	0.926224	7.6e-07
	MIN	1176826
FREE	2 cell(1, 1)	5525052	3.92481e+06
	2 cell(2, 1)	5604080	4.00384e+06
	2 cell(3, 1)	4830271	3.23003e+06
	2 cell(4, 1)	4087905	2.48766e+06
	2 cell(5, 1)	2988365	1.38812e+06
	2 cell(6, 1)	2626014	1.02577e+06
	2 cell(7, 1)	2370663	770422
	2 cell(8, 1)	2137152	536911
	2 cell(9, 1)	2019480	419239
	2 cell(10, 1)	1977131	376890
	MIN
	Area Free	35904
	Area Bound	26404
	Back. Free	1.60024e+06
