# Supplementary material for: A novel single alpha-helix DNA-binding domain in CAF-1 promotes gene silencing and DNA damage survival through tetrasome-length DNA selectivity and spacer function
Source: eLife journal article supplement (doi:10.7554/elife.83538), 2023-06-14
Supplement: fig1-data1 [file 211004 Cy5 50 bp EMSA with yCAF1 WT_Table.xlsx]

## Sheet: 211004 Cy5 50 bp EMSA with yCAF
	Name	Volume	Background	Background Level	Background Type	Median Intensity	Average Intensity	Mode Intensity	Std Dev	Variance	Min Intensity	Max Intensity	Percent	Area > Background	Centre X	Centre Y	Width	Height	Area	Comment
	1 cell(1, 1)	1570576	0	0	None	47	46.87	48	8.08	65.33	82	15	2.1	33510	529	929	135	253	33510
	1 cell(2, 1)	1540432	0	0	None	46	45.62	45	7.63	58.24	76	15	2.06	33765	662	930	136	252	33765
	1 cell(3, 1)	1577473	0	0	None	46	47.07	46	8.99	80.9	113	18	2.11	33510	794	930	135	253	33510
	1 cell(4, 1)	2140339	0	0	None	51	63.87	48	49.01	2401.84	486	19	2.86	33513	926	931	135	252	33513
	1 cell(5, 1)	2885614	0	0	None	55	85.47	47	91.88	8442.26	830	18	3.85	33762	1059	931	136	253	33762
	1 cell(6, 1)	3697201	0	0	None	61	110.33	47	126.88	16099.6	814	21	4.93	33510	1191	932	135	253	33510
	1 cell(7, 1)	4613809	0	0	None	70	137.67	47	186.62	34827.2	1825	22	6.16	33513	1323	933	135	252	33513
	1 cell(8, 1)	5445838	0	0	None	79	162.51	53	250.08	62539	2323	23	7.27	33510	1455	933	135	253	33510
	1 cell(9, 1)	6169880	0	0	None	78	182.73	53	300.52	90311.7	2753	22	8.23	33765	1588	934	136	252	33765
	1 cell(10, 1)	6315155	0	0	None	79	188.46	56	284.9	81169	2470	19	8.43	33510	1720	934	135	253	33510
	2 cell(1, 1)	6238372	0	0	None	72	215.8	53	298.39	89035.9	1584	18	8.33	28908	516	1333	132	220	28908
	2 cell(2, 1)	5994639	0	0	None	67	205.81	55	313.31	98164.6	1835	25	8	29127	648	1334	133	220	29127
	2 cell(3, 1)	5790469	0	0	None	66	200.31	53	314.29	98775.1	1892	23	7.73	28908	781	1335	132	220	28908
	2 cell(4, 1)	5115317	0	0	None	70	176.95	54	264.05	69720.4	1573	23	6.83	28908	913	1336	132	220	28908
	2 cell(5, 1)	4409601	0	0	None	71	151.39	60	201.88	40756.7	1234	29	5.89	29127	1045	1337	133	220	29127
	2 cell(6, 1)	3262037	0	0	None	67	112.84	55	125.21	15678	757	27	4.35	28908	1178	1337	132	219	28908
	2 cell(7, 1)	2814715	0	0	None	66	97.37	50	89.56	8020.46	620	22	3.76	28908	1310	1338	132	220	28908
	2 cell(8, 1)	2053144	0	0	None	61	71.02	51	34.66	1201.24	259	22	2.74	28908	1442	1339	132	220	28908
	2 cell(9, 1)	1759154	0	0	None	56	60.4	53	18.71	350.11	162	22	2.35	29127	1574	1340	133	220	29127
	2 cell(10, 1)	1534308	0	0	None	52	53.08	52	10.2	104	108	22	2.05	28908	1707	1341	132	220	28908

## Sheet: Fraction Bound
	Name	Volume	Less Backg.	Fract. Bound	[C]
BOUND	1 cell(1, 1)	1570576	30144	0.0060901	0
	1 cell(2, 1)	1540432	0	0	5e-09
	1 cell(3, 1)	1577473	37041	0.00821551	1.2e-08
	1 cell(4, 1)	2140339	599907	0.136455	2.1e-08
	1 cell(5, 1)	2885614	1345182	0.303246	3.7e-08
	1 cell(6, 1)	3697201	2156769	0.526046	4.9e-08
	1 cell(7, 1)	4613809	3073377	0.672622	6.4e-08
	1 cell(8, 1)	5445838	3905406	0.841736	1.1e-07
	1 cell(9, 1)	6169880	4629448	0.91315	1.5e-07
	1 cell(10, 1)	6315155	4774723	0.956823	2.5e-07
	MIN	1540432
FREE	2 cell(1, 1)	6238372	4.91953e+06
	2 cell(2, 1)	5994639	4.67579e+06
	2 cell(3, 1)	5790469	4.47162e+06
	2 cell(4, 1)	5115317	3.79647e+06
	2 cell(5, 1)	4409601	3.09076e+06
	2 cell(6, 1)	3262037	1.94319e+06
	2 cell(7, 1)	2814715	1.49587e+06
	2 cell(8, 1)	2053144	734299
	2 cell(9, 1)	1759154	440309
	2 cell(10, 1)	1534308	215463
	MIN
	Area Free	28908
	Area Bound	33765
	Back. Free	1.31885e+06
