# Supplementary material for: A novel single alpha-helix DNA-binding domain in CAF-1 promotes gene silencing and DNA damage survival through tetrasome-length DNA selectivity and spacer function
Source: eLife journal article supplement (doi:10.7554/elife.83538), 2023-06-14
Supplement: fig1-data1 [file 211004 Cy5 80 bp EMSA with yCAF1 WT_Table.xlsx]

## Sheet: 211004 Cy5 80 bp EMSA with yCAF
	Name	Volume	Background	Background Level	Background Type	Median Intensity	Average Intensity	Mode Intensity	Std Dev	Variance	Min Intensity	Max Intensity	Percent	Area > Background	Centre X	Centre Y	Width	Height	Area	Comment
	1 cell(1, 1)	1591242	0	0	None	45	45.5	45	8.75	76.58	236	14	2.35	34974	551	1061	136	267	34974
	1 cell(2, 1)	1565093	0	0	None	45	44.75	43	8.27	68.42	278	16	2.31	34974	681	1061	136	267	34974
	1 cell(3, 1)	1654798	0	0	None	46	46.96	46	10.75	115.67	144	17	2.44	35241	811	1061	137	267	35241
	1 cell(4, 1)	2628472	0	0	None	54	75.16	48	69.42	4818.92	648	18	3.88	34974	942	1061	136	267	34974
	1 cell(5, 1)	3581429	0	0	None	60	102.4	49	115.8	13408.9	893	19	5.29	34974	1072	1061	136	267	34974
	1 cell(6, 1)	4272697	0	0	None	69	122.17	51	145.29	21109.5	1224	21	6.31	34974	1202	1061	136	267	34974
	1 cell(7, 1)	4854702	0	0	None	76	138.81	48	181.85	33068.7	1734	19	7.17	34974	1332	1061	136	267	34974
	1 cell(8, 1)	5296889	0	0	None	77	150.3	46	230.2	52990.2	2078	18	7.82	35241	1462	1061	137	267	35241
	1 cell(9, 1)	5859086	0	0	None	63	167.53	49	302.95	91778.2	3050	21	8.65	34974	1593	1061	136	267	34974
	1 cell(10, 1)	5963190	0	0	None	65	170.5	49	301.46	90877.9	3086	16	8.8	34974	1723	1061	136	267	34974
	2 cell(1, 1)	5356254	0	0	None	98	276.04	56	339.62	115343	1564	23	7.91	19404	552	1411	132	147	19404
	2 cell(2, 1)	5196814	0	0	None	96	267.82	57	325.75	106114	1532	26	7.67	19404	684	1411	132	147	19404
	2 cell(3, 1)	5071595	0	0	None	96	261.37	55	313.65	98376.6	1472	26	7.49	19404	816	1411	132	147	19404
	2 cell(4, 1)	4179169	0	0	None	91	215.38	57	248.07	61539.4	1218	30	6.17	19404	948	1411	132	147	19404
	2 cell(5, 1)	2923130	0	0	None	80	150.65	56	151.88	23067.3	727	27	4.31	19404	1080	1411	132	147	19404
	2 cell(6, 1)	2535420	0	0	None	77	130.66	58	121.98	14878.9	613	25	3.74	19404	1212	1411	132	147	19404
	2 cell(7, 1)	1897835	0	0	None	69	97.81	54	70.64	4990.61	379	24	2.8	19404	1344	1411	132	147	19404
	2 cell(8, 1)	1326315	0	0	None	60	68.35	59	27.76	770.89	195	22	1.96	19404	1476	1411	132	147	19404
	2 cell(9, 1)	1015873	0	0	None	52	52.35	52	9.74	94.84	92	13	1.5	19404	1608	1411	132	147	19404
	2 cell(10, 1)	977449	0	0	None	50	50.37	47	9.43	88.88	98	13	1.44	19404	1740	1411	132	147	19404

## Sheet: Fraction Bound
	Name	Volume	Less Backg.	Fract. Bound	[C]
BOUND	1 cell(1, 1)	1591242	26149	0.00579278	0
	1 cell(2, 1)	1565093	0	0	5e-09
	1 cell(3, 1)	1654798	89705	0.0208958	1.2e-08
	1 cell(4, 1)	2628472	1063379	0.243102	2.1e-08
	1 cell(5, 1)	3581429	2016336	0.495276	3.7e-08
	1 cell(6, 1)	4272697	2707604	0.618925	4.9e-08
	1 cell(7, 1)	4854702	3289609	0.76164	6.4e-08
	1 cell(8, 1)	5296889	3731796	0.890691	1.1e-07
	1 cell(9, 1)	5859086	4293993	0.966782	1.5e-07
	1 cell(10, 1)	5963190	4398097	0.975791	2.5e-07
	MIN	1565093
FREE	2 cell(1, 1)	5356254	4.48792e+06
	2 cell(2, 1)	5196814	4.32848e+06
	2 cell(3, 1)	5071595	4.20326e+06
	2 cell(4, 1)	4179169	3.31084e+06
	2 cell(5, 1)	2923130	2.0548e+06
	2 cell(6, 1)	2535420	1.66709e+06
	2 cell(7, 1)	1897835	1.0295e+06
	2 cell(8, 1)	1326315	457982
	2 cell(9, 1)	1015873	147540
	2 cell(10, 1)	977449	109116
	MIN	977449
	Area Free	19404
	Area Bound	34974
	Back. Free	868333
