# Supplementary material for: A novel single alpha-helix DNA-binding domain in CAF-1 promotes gene silencing and DNA damage survival through tetrasome-length DNA selectivity and spacer function
Source: eLife journal article supplement (doi:10.7554/elife.83538), 2023-06-14
Supplement: fig1-data2 [file 211118 Cy5 30bp EMSA with yKER_Table.xlsx]

## Sheet: 211118 Cy5 30bp EMSA with yKER_
	Name	Volume	Background	Background Level	Background Type	Median Intensity	Average Intensity	Mode Intensity	Std Dev	Variance	Min Intensity	Max Intensity	Percent	Area > Background	Centre X	Centre Y	Width	Height	Area	Comment
	1 cell(1, 1)	3310758	0	0	None	72	71.82	71	8.55	73.08	107	30	4.69	46096	495	1123	134	344	46096
	1 cell(2, 1)	3558875	0	0	None	74	77.79	71	20.4	416.17	241	38	5.04	45752	628	1123	133	344	45752
	1 cell(3, 1)	3755173	0	0	None	75	81.46	72	26.91	723.97	293	41	5.32	46096	762	1123	134	344	46096
	1 cell(4, 1)	3762088	0	0	None	75	82.23	71	28.19	794.77	286	41	5.33	45752	895	1122	133	345	45752
	1 cell(5, 1)	4148749	0	0	None	77	90	71	37.34	1394.24	284	34	5.88	46096	1029	1122	134	344	46096
	1 cell(6, 1)	4414370	0	0	None	79	95.76	76	42.32	1791.15	322	38	6.25	46096	1163	1122	134	344	46096
	1 cell(7, 1)	4761501	0	0	None	89	104.07	74	47.49	2255.5	388	41	6.75	45752	1296	1121	133	345	45752
	1 cell(8, 1)	4591006	0	0	None	87	99.6	72	41.96	1760.55	351	39	6.5	46096	1430	1121	134	344	46096
	1 cell(9, 1)	5091501	0	0	None	94	111.28	73	58.09	3374.29	443	43	7.21	45752	1563	1120	133	345	45752
	1 cell(10, 1)	4674419	0	0	None	90	101.41	78	40.04	1603.58	370	35	6.62	46096	1697	1119	134	345	46096
	2 cell(1, 1)	3728230	0	0	None	82	150.23	75	137.96	19032.3	744	43	5.28	24816	494	1393	132	188	24816
	2 cell(2, 1)	3594466	0	0	None	87	143.76	75	114.04	13005.9	583	44	5.09	25004	626	1393	133	188	25004
	2 cell(3, 1)	3384394	0	0	None	90	136.38	75	93.6	8760.48	477	47	4.79	24816	759	1393	132	188	24816
	2 cell(4, 1)	3384055	0	0	None	94	135.34	79	86.36	7457.59	460	44	4.79	25004	891	1393	133	188	25004
	2 cell(5, 1)	3071616	0	0	None	98	123.78	83	60.63	3676.1	350	48	4.35	24816	1024	1393	132	188	24816
	2 cell(6, 1)	2834283	0	0	None	98	114.21	82	46.04	2119.8	299	47	4.02	24816	1156	1393	132	188	24816
	2 cell(7, 1)	2336110	0	0	None	86	93.43	80	27.21	740.38	266	43	3.31	25004	1288	1393	133	188	25004
	2 cell(8, 1)	2097127	0	0	None	81	84.51	75	17.97	322.81	171	44	2.97	24816	1421	1393	132	188	24816
	2 cell(9, 1)	2090449	0	0	None	80	83.6	75	16.55	273.81	165	40	2.96	25004	1553	1393	133	188	25004
	2 cell(10, 1)	1999966	0	0	None	79	80.59	77	11.73	137.5	140	45	2.83	24816	1686	1393	132	188	24816

## Sheet: Fraction Bound
	Name	Volume	Less Backg.	Fract. Bound	[C]
BOUND	1 cell(1, 1)	3310758	0	0	0
	1 cell(2, 1)	3558875	248117	0.120432	9e-09
	1 cell(3, 1)	3755173	444415	0.217164	1.2e-08
	1 cell(4, 1)	3762088	451330	0.219837	1.6e-08
	1 cell(5, 1)	4148749	837991	0.393933	2.1e-08
	1 cell(6, 1)	4414370	1103612	0.51199	2.8e-08
	1 cell(7, 1)	4761501	1450743	0.723746	3.7e-08
	1 cell(8, 1)	4591006	1280248	0.802657	4.9e-08
	1 cell(9, 1)	5091501	1780743	0.852507	6.4e-08
	1 cell(10, 1)	4674419	1363661	0.862386	8.4e-08
	MIN	3310758
FREE	2 cell(1, 1)	3728230	1.94587e+06
	2 cell(2, 1)	3594466	1.8121e+06
	2 cell(3, 1)	3384394	1.60203e+06
	2 cell(4, 1)	3384055	1.60169e+06
	2 cell(5, 1)	3071616	1.28925e+06
	2 cell(6, 1)	2834283	1.05192e+06
	2 cell(7, 1)	2336110	553748
	2 cell(8, 1)	2097127	314765
	2 cell(9, 1)	2090449	308087
	2 cell(10, 1)	1999966	217604
	MIN	1999966
	Area Free	24816
	Area Bound	46096
	Back. Free	1.78236e+06
