# Supplementary material for: A novel single alpha-helix DNA-binding domain in CAF-1 promotes gene silencing and DNA damage survival through tetrasome-length DNA selectivity and spacer function
Source: eLife journal article supplement (doi:10.7554/elife.83538), 2023-06-14
Supplement: fig1-data2 [file 211118 Cy5 40bp EMSA with yKER_Table.xlsx]

## Sheet: 211118 Cy5 40bp EMSA with yKER_
	Name	Volume	Background	Background Level	Background Type	Median Intensity	Average Intensity	Mode Intensity	Std Dev	Variance	Min Intensity	Max Intensity	Percent	Area > Background	Centre X	Centre Y	Width	Height	Area	Comment
	1 cell(1, 1)	2931115	0	0	None	75	75.89	73	13.93	193.97	268	40	3.12	38623	519	1017	138	284	38623
	1 cell(2, 1)	3652665	0	0	None	76	94.57	73	66.92	4478.58	544	42	3.89	38623	654	1017	138	284	38623
	1 cell(3, 1)	3439508	0	0	None	76	89.05	76	47.41	2247.69	443	41	3.66	38623	789	1017	138	284	38623
	1 cell(4, 1)	4920872	0	0	None	79	127.41	73	130.8	17109	1012	43	5.24	38623	924	1017	138	284	38623
	1 cell(5, 1)	5813499	0	0	None	82	150.52	75	155.07	24046.6	951	43	6.19	38623	1059	1017	138	284	38623
	1 cell(6, 1)	6058481	0	0	None	84	156.86	74	155.49	24177.3	1149	44	6.45	38623	1194	1017	138	284	38623
	1 cell(7, 1)	6593092	0	0	None	92	170.7	75	182.21	33200.2	1561	43	7.02	38623	1329	1017	138	284	38623
	1 cell(8, 1)	7019824	0	0	None	102	181.75	75	219.16	48031	1829	46	7.47	38623	1464	1017	138	284	38623
	1 cell(9, 1)	7109899	0	0	None	101	184.08	83	218.29	47650.5	1634	44	7.57	38623	1599	1017	138	284	38623
	1 cell(10, 1)	7474968	0	0	None	106	193.54	81	229.38	52615.8	1621	44	7.96	38623	1734	1017	138	284	38623
	2 cell(1, 1)	6432565	0	0	None	97	241.83	77	315	99223.7	1661	35	6.85	26600	531	1259	133	200	26600
	2 cell(2, 1)	5621804	0	0	None	96	211.35	79	249.35	62176.3	1309	44	5.98	26600	664	1259	133	200	26600
	2 cell(3, 1)	5965118	0	0	None	102	224.25	78	264.31	69859	1329	46	6.35	26600	797	1259	133	200	26600
	2 cell(4, 1)	4365524	0	0	None	100	164.12	83	141.92	20140.3	826	44	4.65	26600	930	1259	133	200	26600
	2 cell(5, 1)	3624934	0	0	None	101	136.28	80	80.21	6433.02	464	53	3.86	26600	1063	1259	133	200	26600
	2 cell(6, 1)	3263971	0	0	None	99	122.71	82	57.38	3292.58	337	48	3.47	26600	1196	1259	133	200	26600
	2 cell(7, 1)	2722264	0	0	None	93	102.34	81	30.93	956.43	220	48	2.9	26600	1329	1259	133	200	26600
	2 cell(8, 1)	2403199	0	0	None	85	90.35	77	22.23	494.34	197	42	2.56	26600	1462	1258	133	201	26600
	2 cell(9, 1)	2276976	0	0	None	83	85.6	81	16.06	257.81	158	45	2.42	26600	1595	1258	133	200	26600
	2 cell(10, 1)	2248731	0	0	None	82	84.54	79	16.44	270.23	552	44	2.39	26600	1728	1257	133	201	26600

## Sheet: Fraction Bound
	Name	Volume	Less Backg.	Fract. Bound	[C]
BOUND	1 cell(1, 1)	2931115	0	0	0
	1 cell(2, 1)	3652665	721550	0.166845	9e-09
	1 cell(3, 1)	3439508	508393	0.114122	1.2e-08
	1 cell(4, 1)	4920872	1989757	0.458829	1.6e-08
	1 cell(5, 1)	5813499	2882384	0.642152	2.1e-08
	1 cell(6, 1)	6058481	3127366	0.71521	2.8e-08
	1 cell(7, 1)	6593092	3661977	0.838834	3.7e-08
	1 cell(8, 1)	7019824	4088709	0.914041	4.9e-08
	1 cell(9, 1)	7109899	4178784	0.941788	6.4e-08
	1 cell(10, 1)	7474968	4543853	0.951812	8.4e-08
	MIN	2931115
FREE	2 cell(1, 1)	6432565	4.41388e+06
	2 cell(2, 1)	5621804	3.60312e+06
	2 cell(3, 1)	5965118	3.94643e+06
	2 cell(4, 1)	4365524	2.34684e+06
	2 cell(5, 1)	3624934	1.60625e+06
	2 cell(6, 1)	3263971	1.24529e+06
	2 cell(7, 1)	2722264	703579
	2 cell(8, 1)	2403199	384514
	2 cell(9, 1)	2276976	258291
	2 cell(10, 1)	2248731	230046
	MIN	2248731
	Area Free	26600
	Area Bound	38623
	Back. Free	2.01868e+06
