# Supplementary material for: A novel single alpha-helix DNA-binding domain in CAF-1 promotes gene silencing and DNA damage survival through tetrasome-length DNA selectivity and spacer function
Source: eLife journal article supplement (doi:10.7554/elife.83538), 2023-06-14
Supplement: fig1-data2 [file 211119 Cy5 30bp EMSA with yKER_Table.xlsx]

## Sheet: 211119 Cy5 30bp EMSA with yKER_
	Name	Volume	Background	Background Level	Background Type	Median Intensity	Average Intensity	Mode Intensity	Std Dev	Variance	Min Intensity	Max Intensity	Percent	Area > Background	Centre X	Centre Y	Width	Height	Area	Comment
	1 cell(1, 1)	3455408	0	0	None	75	75.31	75	9.03	81.47	109	41	4.61	45885	408	1135	133	345	45885
	1 cell(2, 1)	3496584	0	0	None	74	76.2	73	14.57	212.2	486	41	4.67	45885	541	1136	133	346	45885
	1 cell(3, 1)	3765604	0	0	None	75	82.07	72	27	729.21	281	43	5.02	45885	674	1136	133	345	45885
	1 cell(4, 1)	4375277	0	0	None	80	95.35	75	40.76	1661.57	310	40	5.84	45885	807	1136	133	345	45885
	1 cell(5, 1)	4772049	0	0	None	83	104	74	50.45	2545.61	403	41	6.37	45885	940	1137	133	346	45885
	1 cell(6, 1)	4897183	0	0	None	87	107.54	75	51.98	2701.92	380	40	6.53	45540	1073	1137	132	345	45540
	1 cell(7, 1)	5023978	0	0	None	90	109.49	77	52.49	2754.99	422	44	6.7	45885	1205	1137	133	345	45885
	1 cell(8, 1)	5158028	0	0	None	95	112.41	78	52.38	2744.18	471	42	6.88	45885	1338	1137	133	345	45885
	1 cell(9, 1)	5384474	0	0	None	98	117.35	75	65.9	4343.06	3508	45	7.18	45885	1471	1138	133	346	45885
	1 cell(10, 1)	5342078	0	0	None	99	116.42	80	52.51	2757.44	539	43	7.13	45885	1604	1138	133	345	45885
	2 cell(1, 1)	4255616	0	0	None	90	158	80	153.74	23636.9	840	45	5.68	26934	406	1411	134	201	26934
	2 cell(2, 1)	3896049	0	0	None	85	143.58	77	132.35	17517.5	741	42	5.2	27135	540	1411	135	201	27135
	2 cell(3, 1)	3563210	0	0	None	89	132.29	77	99.2	9841.49	577	42	4.75	26934	675	1411	134	201	26934
	2 cell(4, 1)	3065580	0	0	None	91	112.98	82	56	3136.01	384	48	4.09	27135	809	1411	135	201	27135
	2 cell(5, 1)	2762151	0	0	None	90	102.55	82	36.65	1343.46	281	44	3.69	26934	944	1411	134	201	26934
	2 cell(6, 1)	2569063	0	0	None	88	95.38	80	26.74	714.91	221	49	3.43	26934	1078	1411	134	201	26934
	2 cell(7, 1)	2427975	0	0	None	84	89.48	79	21.17	448.15	208	48	3.24	27135	1212	1411	135	201	27135
	2 cell(8, 1)	2291899	0	0	None	82	85.09	81	16.11	259.68	208	49	3.06	26934	1347	1411	134	201	26934
	2 cell(9, 1)	2253155	0	0	None	81	83.04	77	14.47	209.45	160	46	3.01	27135	1481	1411	135	201	27135
	2 cell(10, 1)	2190139	0	0	None	80	81.32	79	11.76	138.3	147	41	2.92	26934	1616	1411	134	201	26934

## Sheet: Fraction Bound
	Name	Volume	Less Backg.	Fract. Bound	[C]
BOUND	1 cell(1, 1)	3455408	0	0	0
	1 cell(2, 1)	3496584	41176	0.0215701	9e-09
	1 cell(3, 1)	3765604	310196	0.168117	1.2e-08
	1 cell(4, 1)	4375277	919869	0.470002	1.6e-08
	1 cell(5, 1)	4772049	1316641	0.642106	2.1e-08
	1 cell(6, 1)	4897183	1441775	0.727232	2.8e-08
	1 cell(7, 1)	5023978	1568570	0.796933	3.7e-08
	1 cell(8, 1)	5158028	1702620	0.86593	4.9e-08
	1 cell(9, 1)	5384474	1929066	0.895601	6.4e-08
	1 cell(10, 1)	5342078	1886670	0.920991	8.4e-08
	MIN	3455408
FREE	2 cell(1, 1)	4255616	2.22733e+06
	2 cell(2, 1)	3896049	1.86776e+06
	2 cell(3, 1)	3563210	1.53492e+06
	2 cell(4, 1)	3065580	1.03729e+06
	2 cell(5, 1)	2762151	733864
	2 cell(6, 1)	2569063	540776
	2 cell(7, 1)	2427975	399688
	2 cell(8, 1)	2291899	263612
	2 cell(9, 1)	2253155	224868
	2 cell(10, 1)	2190139	161852
	MIN	2190139
	Area Free	26934
	Area Bound	45885
	Back. Free	2.02829e+06
