# Supplementary material for: A novel single alpha-helix DNA-binding domain in CAF-1 promotes gene silencing and DNA damage survival through tetrasome-length DNA selectivity and spacer function
Source: eLife journal article supplement (doi:10.7554/elife.83538), 2023-06-14
Supplement: fig1-data2 [file 211119 Cy5 40bp EMSA with yKER_Table.xlsx]

## Sheet: 211119 Cy5 40bp EMSA with yKER_
	Name	Volume	Background	Background Level	Background Type	Median Intensity	Average Intensity	Mode Intensity	Std Dev	Variance	Min Intensity	Max Intensity	Percent	Area > Background	Centre X	Centre Y	Width	Height	Area	Comment
	1 cell(1, 1)	3537298	0	0	None	79	79.14	77	10.24	104.82	155	40	3.92	44696	328	1047	138	345	44696
	1 cell(2, 1)	3468579	0	0	None	76	78.2	74	14.43	208.13	197	40	3.84	44358	459	1051	137	345	44358
	1 cell(3, 1)	3512965	0	0	None	75	78.6	74	18.37	337.38	206	32	3.89	44696	591	1055	138	345	44696
	1 cell(4, 1)	4821120	0	0	None	78	107.86	74	110.47	12203.2	1137	45	5.34	44696	723	1059	138	345	44696
	1 cell(5, 1)	6417116	0	0	None	84	143.54	77	151.21	22865.3	1085	44	7.11	44706	855	1064	138	346	44706
	1 cell(6, 1)	7095914	0	0	None	90	159.97	80	161.73	26158	1395	48	7.86	44358	986	1068	137	345	44358
	1 cell(7, 1)	7204305	0	0	None	93	161.18	76	165.88	27515.3	1349	45	7.98	44696	1118	1072	138	345	44696
	1 cell(8, 1)	7688652	0	0	None	98	172.02	77	207.57	43087.2	1832	43	8.51	44696	1250	1076	138	345	44696
	1 cell(9, 1)	7610331	0	0	None	98	171.57	77	207.09	42886	1703	45	8.43	44358	1381	1080	137	345	44358
	1 cell(10, 1)	7746670	0	0	None	100	173.32	79	204.31	41742	1555	43	8.58	44696	1513	1084	138	345	44696
	2 cell(1, 1)	5945182	0	0	None	204	378.75	92	380.58	144844	1614	58	6.58	15697	323	1281	133	122	15697
	2 cell(2, 1)	5387327	0	0	None	178	345.87	83	353.56	125004	1515	52	5.97	15576	456	1284	132	121	15576
	2 cell(3, 1)	5319485	0	0	None	185	338.89	86	333.28	111076	1407	55	5.89	15697	588	1288	133	122	15697
	2 cell(4, 1)	3900303	0	0	None	168	250.4	87	205.84	42370.1	942	55	4.32	15576	721	1291	132	121	15576
	2 cell(5, 1)	2628235	0	0	None	142	167.44	87	88.18	7775.24	506	57	2.91	15697	853	1295	133	122	15697
	2 cell(6, 1)	1977252	0	0	None	119	125.96	90	39.03	1523.19	263	50	2.19	15697	986	1299	133	122	15697
	2 cell(7, 1)	1745475	0	0	None	106	112.06	91	29.38	862.99	213	55	1.93	15576	1119	1302	132	121	15576
	2 cell(8, 1)	1501022	0	0	None	93	95.62	90	18.65	347.68	164	50	1.66	15697	1251	1306	133	122	15697
	2 cell(9, 1)	1432109	0	0	None	89	91.94	88	18.43	339.53	175	50	1.59	15576	1384	1309	132	121	15576
	2 cell(10, 1)	1375750	0	0	None	86	87.64	84	14.45	208.81	146	49	1.52	15697	1516	1313	133	122	15697

## Sheet: Fraction Bound
	Name	Volume	Less Backg.	Fract. Bound	[C]
BOUND	1 cell(1, 1)	3537298	68719	0.0143569	0
	1 cell(2, 1)	3468579	0	0	9e-09
	1 cell(3, 1)	3512965	44386	0.0107305	1.2e-08
	1 cell(4, 1)	4821120	1352541	0.336	1.6e-08
	1 cell(5, 1)	6417116	2948537	0.677927	2.1e-08
	1 cell(6, 1)	7095914	3627335	0.828696	2.8e-08
	1 cell(7, 1)	7204305	3735726	0.878215	3.7e-08
	1 cell(8, 1)	7688652	4220073	0.939116	4.9e-08
	1 cell(9, 1)	7610331	4141752	0.952908	6.4e-08
	1 cell(10, 1)	7746670	4278091	0.966492	8.4e-08
	MIN	3468579
FREE	2 cell(1, 1)	5945182	4.71775e+06
	2 cell(2, 1)	5387327	4.1599e+06
	2 cell(3, 1)	5319485	4.09206e+06
	2 cell(4, 1)	3900303	2.67287e+06
	2 cell(5, 1)	2628235	1.40081e+06
	2 cell(6, 1)	1977252	749823
	2 cell(7, 1)	1745475	518046
	2 cell(8, 1)	1501022	273593
	2 cell(9, 1)	1432109	204680
	2 cell(10, 1)	1375750	148321
	MIN	1375750
	Area Free	15697
	Area Bound	44358
	Back. Free	1.22743e+06
