# Supplementary material for: A novel single alpha-helix DNA-binding domain in CAF-1 promotes gene silencing and DNA damage survival through tetrasome-length DNA selectivity and spacer function
Source: eLife journal article supplement (doi:10.7554/elife.83538), 2023-06-14
Supplement: fig1-data2 [file 211122Cy5 30bp EMSA with yKER_Table.xlsx]

## Sheet: 211122Cy5 30bp EMSA with yKER_T
	Name	Volume	Background	Background Level	Background Type	Median Intensity	Average Intensity	Mode Intensity	Std Dev	Variance	Min Intensity	Max Intensity	Percent	Area > Background	Centre X	Centre Y	Width	Height	Area	Comment
	1 cell(1, 1)	3216252	0	0	None	72	71.87	72	8.67	75.09	219	40	4.35	44748	552	1157	132	339	44748
	1 cell(2, 1)	3283104	0	0	None	72	72.82	71	9.71	94.25	128	37	4.45	45087	684	1157	133	339	45087
	1 cell(3, 1)	3405668	0	0	None	74	76.11	74	30.42	925.57	1900	43	4.61	44748	817	1157	132	339	44748
	1 cell(4, 1)	3970288	0	0	None	78	88.73	75	35.26	1243.14	303	41	5.38	44748	949	1157	132	339	44748
	1 cell(5, 1)	4096818	0	0	None	79	90.86	74	35.76	1278.42	290	45	5.55	45087	1081	1157	133	339	45087
	1 cell(6, 1)	4859061	0	0	None	85	108.59	75	55.69	3101.69	374	44	6.58	44748	1214	1157	132	339	44748
	1 cell(7, 1)	4999825	0	0	None	93	111.73	72	57.48	3303.73	519	44	6.77	44748	1346	1157	132	339	44748
	1 cell(8, 1)	5079727	0	0	None	96	113.52	77	56.52	3194.85	626	46	6.88	44748	1478	1157	132	339	44748
	1 cell(9, 1)	5352816	0	0	None	101	118.72	77	61.01	3722.26	490	42	7.25	45087	1610	1157	133	339	45087
	1 cell(10, 1)	5464900	0	0	None	103	122.13	80	62.24	3873.47	494	42	7.4	44748	1743	1157	132	339	44748
	2 cell(1, 1)	4134112	0	0	None	88	171.12	77	169.47	28720.3	861	39	5.6	24159	554	1442	136	183	24159
	2 cell(2, 1)	3967335	0	0	None	87	165.49	76	162.95	26553.2	846	42	5.37	23973	686	1442	135	184	23973
	2 cell(3, 1)	3939567	0	0	None	91	163.09	81	154.61	23905.7	825	45	5.33	24156	819	1441	136	184	24156
	2 cell(4, 1)	3444613	0	0	None	97	143.69	81	100.66	10132.8	577	48	4.66	23973	951	1440	135	184	23973
	2 cell(5, 1)	3342075	0	0	None	99	138.35	83	88.17	7773.68	525	54	4.52	24156	1084	1439	136	184	24156
	2 cell(6, 1)	2568118	0	0	None	94	106.3	87	37.3	1391.32	305	46	3.48	24159	1217	1438	136	183	24159
	2 cell(7, 1)	2247258	0	0	None	88	93.74	81	22.66	513.27	217	48	3.04	23973	1349	1438	135	184	23973
	2 cell(8, 1)	2205246	0	0	None	87	91.29	83	20.98	440.23	193	48	2.99	24156	1482	1437	136	184	24156
	2 cell(9, 1)	2152022	0	0	None	86	89.77	81	18.9	357.36	182	49	2.91	23973	1614	1436	135	184	23973
	2 cell(10, 1)	2131153	0	0	None	86	88.24	80	16.37	267.9	225	48	2.89	24152	1747	1434	136	185	24152

## Sheet: Fraction Bound
	Name	Volume	Less Backg.	Fract. Bound	[C]
BOUND	1 cell(1, 1)	3216252	0	0	0
	1 cell(2, 1)	3283104	66852	0.029088	9e-09
	1 cell(3, 1)	3405668	189416	0.0791521	1.2e-08
	1 cell(4, 1)	3970288	754036	0.306179	1.6e-08
	1 cell(5, 1)	4096818	880566	0.354107	2.1e-08
	1 cell(6, 1)	4859061	1642809	0.663759	2.8e-08
	1 cell(7, 1)	4999825	1783573	0.777186	3.7e-08
	1 cell(8, 1)	5079727	1863475	0.798814	4.9e-08
	1 cell(9, 1)	5352816	2136564	0.836993	6.4e-08
	1 cell(10, 1)	5464900	2248648	0.85051	8.4e-08
	MIN	3216252
FREE	2 cell(1, 1)	4134112	2.39819e+06
	2 cell(2, 1)	3967335	2.23142e+06
	2 cell(3, 1)	3939567	2.20365e+06
	2 cell(4, 1)	3444613	1.70869e+06
	2 cell(5, 1)	3342075	1.60616e+06
	2 cell(6, 1)	2568118	832199
	2 cell(7, 1)	2247258	511339
	2 cell(8, 1)	2205246	469327
	2 cell(9, 1)	2152022	416103
	2 cell(10, 1)	2131153	395234
	MIN	2131153
	Area Free	24152
	Area Bound	44748
	Back. Free	1.73592e+06
