# Supplementary material for: A novel single alpha-helix DNA-binding domain in CAF-1 promotes gene silencing and DNA damage survival through tetrasome-length DNA selectivity and spacer function
Source: eLife journal article supplement (doi:10.7554/elife.83538), 2023-06-14
Supplement: fig1-data2 [file 211122Cy5 40bp EMSA with yKER_Table.xlsx]

## Sheet: 211122Cy5 40bp EMSA with yKER_T
	Name	Volume	Background	Background Level	Background Type	Median Intensity	Average Intensity	Mode Intensity	Std Dev	Variance	Min Intensity	Max Intensity	Percent	Area > Background	Centre X	Centre Y	Width	Height	Area	Comment
	1 cell(1, 1)	3031857	0	0	None	73	73.69	73	10.2	104.02	407	40	3.34	41142	521	1112	134	317	41142
	1 cell(2, 1)	3074580	0	0	None	73	74.73	73	12.31	151.61	317	42	3.38	41142	653	1115	134	317	41142
	1 cell(3, 1)	3101368	0	0	None	74	75.39	75	11.9	141.71	201	43	3.41	41140	785	1118	134	316	41140
	1 cell(4, 1)	3818157	0	0	None	76	92.8	77	61.66	3801.99	681	43	4.2	41142	917	1120	134	317	41142
	1 cell(5, 1)	4737720	0	0	None	79	115.16	75	112.45	12644.8	966	46	5.21	41142	1049	1123	134	317	41142
	1 cell(6, 1)	6230549	0	0	None	84	152.6	77	156.13	24378	1232	44	6.86	40830	1180	1126	133	317	40830
	1 cell(7, 1)	6913139	0	0	None	92	168.03	75	184.5	34041.1	1527	41	7.61	41142	1312	1129	134	317	41142
	1 cell(8, 1)	7111503	0	0	None	97	172.86	77	204.31	41742.2	1764	44	7.83	41140	1444	1132	134	316	41140
	1 cell(9, 1)	7551865	0	0	None	104	183.56	77	223.29	49859.2	1841	38	8.31	41142	1576	1134	134	317	41142
	1 cell(10, 1)	7799914	0	0	None	108	189.59	79	218.52	47751.9	1690	43	8.58	41142	1708	1137	134	317	41142
	2 cell(1, 1)	5888040	0	0	None	152	314.13	80	338.58	114638	1567	50	6.48	18744	526	1345	132	144	18744
	2 cell(2, 1)	5848482	0	0	None	153	314.37	82	334.45	111855	1468	52	6.44	18604	657	1347	131	145	18604
	2 cell(3, 1)	5687840	0	0	None	146	303.45	85	322.75	104167	1450	46	6.26	18744	789	1350	132	144	18744
	2 cell(4, 1)	5125182	0	0	None	145	275.49	88	272.23	74107.7	1268	56	5.64	18604	920	1352	131	145	18604
	2 cell(5, 1)	4403519	0	0	None	145	234.93	90	199.37	39750.2	938	55	4.85	18744	1052	1355	132	144	18744
	2 cell(6, 1)	2789435	0	0	None	125	148.82	89	72.26	5220.91	386	54	3.07	18744	1184	1357	132	144	18744
	2 cell(7, 1)	2185626	0	0	None	107	117.48	86	39.41	1552.96	263	53	2.41	18604	1315	1359	131	145	18604
	2 cell(8, 1)	1953096	0	0	None	97	104.2	83	27.58	760.6	194	45	2.15	18744	1447	1362	132	144	18744
	2 cell(9, 1)	1818428	0	0	None	93	97.74	82	22.24	494.75	178	46	2	18604	1578	1364	131	145	18604
	2 cell(10, 1)	1797989	0	0	None	92	95.92	85	21.55	464.28	182	43	1.98	18744	1710	1367	132	144	18744

## Sheet: Sheet1
	Name	Volume	Less Backg.	Fract. Bound	[C]
BOUND	1 cell(1, 1)	3031857	0	0	0
	1 cell(2, 1)	3074580	42723	0.00947313	9e-09
	1 cell(3, 1)	3101368	69511	0.0158844	1.2e-08
	1 cell(4, 1)	3818157	786300	0.173569	1.6e-08
	1 cell(5, 1)	4737720	1705863	0.360793	2.1e-08
	1 cell(6, 1)	6230549	3198692	0.694336	2.8e-08
	1 cell(7, 1)	6913139	3881282	0.82834	3.7e-08
	1 cell(8, 1)	7111503	4079646	0.87707	4.9e-08
	1 cell(9, 1)	7551865	4520008	0.911817	6.4e-08
	1 cell(10, 1)	7799914	4768057	0.91963	8.4e-08
	MIN	3031857
FREE	2 cell(1, 1)	5888040	4.50675e+06
	2 cell(2, 1)	5848482	4.46719e+06
	2 cell(3, 1)	5687840	4.30655e+06
	2 cell(4, 1)	5125182	3.74389e+06
	2 cell(5, 1)	4403519	3.02223e+06
	2 cell(6, 1)	2789435	1.40814e+06
	2 cell(7, 1)	2185626	804334
	2 cell(8, 1)	1953096	571804
	2 cell(9, 1)	1818428	437136
	2 cell(10, 1)	1797989	416697
	MIN	1797989
	Area Free	18744
	Area Bound	41142
	Back. Free	1.38129e+06
