# Supplementary material for: A novel single alpha-helix DNA-binding domain in CAF-1 promotes gene silencing and DNA damage survival through tetrasome-length DNA selectivity and spacer function
Source: eLife journal article supplement (doi:10.7554/elife.83538), 2023-06-14
Supplement: fig1-data2 [file 211216 Cy5 20 bp EMSA with yKER_n1_Table.xlsx]

## Sheet: 211216 Cy5 20 bp EMSA with yKER
	Name	Volume	Background	Background Level	Background Type	Median Intensity	Average Intensity	Mode Intensity	Std Dev	Variance	Min Intensity	Max Intensity	Percent	Area > Background	Centre X	Centre Y	Width	Height	Area	Comment
	1 cell(1, 1)	3049991	0	0	None	71	71.21	69	8.91	79.41	110	37	2.98	42832	531	1237	134	332	42832
	1 cell(2, 1)	3004224	0	0	None	70	70.69	71	8.74	76.36	113	39	2.93	42500	660	1237	133	332	42500
	1 cell(3, 1)	3183367	0	0	None	72	74.32	71	12.58	158.34	159	37	3.11	42832	790	1237	134	332	42832
	1 cell(4, 1)	3114635	0	0	None	73	73.29	71	9.44	89.17	131	39	3.04	42500	919	1237	133	332	42500
	1 cell(5, 1)	3199402	0	0	None	74	74.7	76	10.48	109.81	159	43	3.12	42832	1049	1237	134	332	42832
	1 cell(6, 1)	3216852	0	0	None	74	75.1	73	10.21	104.3	158	42	3.14	42832	1179	1237	134	332	42832
	1 cell(7, 1)	3723155	0	0	None	78	87.6	74	32.77	1073.62	339	42	3.63	42500	1308	1237	133	332	42500
	1 cell(8, 1)	5224486	0	0	None	82	121.98	73	151.22	22868.6	2155	36	5.1	42832	1438	1237	134	332	42832
	1 cell(9, 1)	5850045	0	0	None	86	137.65	78	186.75	34873.9	1911	40	5.71	42500	1567	1237	133	332	42500
	1 cell(10, 1)	6376821	0	0	None	89	148.88	81	196.63	38662.3	1860	39	6.22	42832	1697	1237	134	332	42832
	2 cell(1, 1)	7464706	0	0	None	100	217.5	81	293.03	85868.4	1930	39	7.29	34320	535	1533	136	262	34320
	2 cell(2, 1)	7428879	0	0	None	100	216.5	84	286.55	82109.2	1773	44	7.25	34314	665	1533	136	263	34314
	2 cell(3, 1)	7030597	0	0	None	101	206.43	80	259.42	67297.2	1570	47	6.86	34058	794	1534	135	262	34058
	2 cell(4, 1)	7291351	0	0	None	101	212.45	82	272.48	74246.9	1565	49	7.12	34320	924	1534	136	262	34320
	2 cell(5, 1)	7094951	0	0	None	97	206.77	82	269.97	72884.4	1535	44	6.93	34314	1054	1534	136	263	34314
	2 cell(6, 1)	6780081	0	0	None	95	197.55	82	261.77	68521.6	1643	47	6.62	34320	1184	1535	136	262	34320
	2 cell(7, 1)	6522710	0	0	None	96	190.06	80	274.15	75158.8	1828	45	6.37	34320	1314	1535	136	262	34320
	2 cell(8, 1)	5096772	0	0	None	88	149.65	80	220.6	48663.1	1541	41	4.98	34058	1443	1535	135	262	34058
	2 cell(9, 1)	4403345	0	0	None	85	128.33	78	164.1	26927.5	1219	41	4.3	34314	1573	1535	136	263	34314
	2 cell(10, 1)	3387491	0	0	None	81	98.7	82	71.18	5066.41	630	44	3.31	34320	1703	1536	136	262	34320

## Sheet: Fraction Bound
	Name	Volume	Less Backg.	Fract. Bound	[C]
BOUND	1 cell(1, 1)	3049991	45767	0.00900132	0
	1 cell(2, 1)	3004224	0	0	9e-09
	1 cell(3, 1)	3183367	179143	0.0374483	1.2e-08
	1 cell(4, 1)	3114635	110411	0.0221898	1.6e-08
	1 cell(5, 1)	3199402	195178	0.040126	2.1e-08
	1 cell(6, 1)	3216852	212628	0.0465604	2.8e-08
	1 cell(7, 1)	3723155	718931	0.149291	3.7e-08
	1 cell(8, 1)	5224486	2220262	0.453945	4.9e-08
	1 cell(9, 1)	5850045	2845821	0.590032	6.4e-08
	1 cell(10, 1)	6376821	3372597	0.778156	8.4e-08
	MIN	3004224
FREE	2 cell(1, 1)	7464706	5.03871e+06
	2 cell(2, 1)	7428879	5.00288e+06
	2 cell(3, 1)	7030597	4.6046e+06
	2 cell(4, 1)	7291351	4.86535e+06
	2 cell(5, 1)	7094951	4.66895e+06
	2 cell(6, 1)	6780081	4.35408e+06
	2 cell(7, 1)	6522710	4.09671e+06
	2 cell(8, 1)	5096772	2.67077e+06
	2 cell(9, 1)	4403345	1.97735e+06
	2 cell(10, 1)	3387491	961492
	MIN	3387491
	Area Free	34320
	Area Bound	42500
	Back. Free	2.426e+06
