# Supplementary material for: A novel single alpha-helix DNA-binding domain in CAF-1 promotes gene silencing and DNA damage survival through tetrasome-length DNA selectivity and spacer function
Source: eLife journal article supplement (doi:10.7554/elife.83538), 2023-06-14
Supplement: fig1-data2 [file 211216 Cy5 20 bp EMSA with yKER_n2_Table.xlsx]

## Sheet: 211216 Cy5 20 bp EMSA with yKER
	Name	Volume	Background	Background Level	Background Type	Median Intensity	Average Intensity	Mode Intensity	Std Dev	Variance	Min Intensity	Max Intensity	Percent	Area > Background	Centre X	Centre Y	Width	Height	Area	Comment
	1 cell(1, 1)	3100585	0	0	None	72	71.95	72	9.05	81.89	195	37	3.08	43092	447	1148	133	324	43092
	1 cell(2, 1)	3054777	0	0	None	71	70.89	71	8.38	70.18	109	38	3.04	43092	580	1148	133	324	43092
	1 cell(3, 1)	3028600	0	0	None	70	70.28	71	8.49	72.13	116	26	3.01	43092	713	1148	133	324	43092
	1 cell(4, 1)	3497979	0	0	None	75	81.17	70	23.67	560.11	266	36	3.48	43092	846	1148	133	324	43092
	1 cell(5, 1)	3156421	0	0	None	73	73.25	74	9.06	82.15	139	38	3.14	43092	979	1148	133	324	43092
	1 cell(6, 1)	3851453	0	0	None	80	90.05	74	33.33	1110.79	299	38	3.83	42768	1112	1148	132	324	42768
	1 cell(7, 1)	3361512	0	0	None	75	78.01	74	15.69	246.32	209	41	3.34	43092	1244	1148	133	324	43092
	1 cell(8, 1)	5557831	0	0	None	87	128.98	79	146.6	21491.8	1658	44	5.52	43092	1377	1148	133	324	43092
	1 cell(9, 1)	5906380	0	0	None	85	137.06	78	180.17	32462	1867	37	5.87	43092	1510	1148	133	324	43092
	1 cell(10, 1)	6449380	0	0	None	91	149.67	84	191.3	36594.9	1783	39	6.41	43092	1643	1148	133	324	43092
	2 cell(1, 1)	7506332	0	0	None	110	224.99	86	284.49	80937.2	1649	48	7.46	33363	443	1448	136	249	33363
	2 cell(2, 1)	7079813	0	0	None	108	213.8	83	252.6	63808.7	1485	49	7.03	33114	575	1448	135	249	33114
	2 cell(3, 1)	7167461	0	0	None	110	214.83	87	252.54	63776.2	1457	52	7.12	33363	708	1448	136	249	33363
	2 cell(4, 1)	6682118	0	0	None	112	201.79	86	231.11	53412.6	1381	49	6.64	33114	840	1448	135	249	33114
	2 cell(5, 1)	6890155	0	0	None	109	206.5	89	233.67	54603.1	1307	55	6.85	33366	973	1448	136	250	33366
	2 cell(6, 1)	6428014	0	0	None	105	192.67	88	227.09	51568	1373	51	6.39	33363	1106	1447	136	249	33363
	2 cell(7, 1)	5984204	0	0	None	104	180.72	90	199.75	39898.7	1247	50	5.95	33114	1238	1447	135	249	33114
	2 cell(8, 1)	4422954	0	0	None	96	132.57	80	129.3	16718.2	908	44	4.39	33363	1371	1447	136	249	33363
	2 cell(9, 1)	3932840	0	0	None	88	118.76	79	113.03	12776.8	821	44	3.91	33117	1503	1447	135	250	33117
	2 cell(10, 1)	3592687	0	0	None	85	107.68	80	86.24	7438.19	670	38	3.57	33366	1636	1446	136	250	33366

## Sheet: Fraction Bound
	Name	Volume	Less Backg.	Fract. Bound	[C]
BOUND	1 cell(1, 1)	3100585	71985	0.0137552	0
	1 cell(2, 1)	3054777	26177	0.00549827	9e-09
	1 cell(3, 1)	3028600	0	0	1.2e-08
	1 cell(4, 1)	3497979	469379	0.0976558	1.6e-08
	1 cell(5, 1)	3156421	127821	0.0273534	2.1e-08
	1 cell(6, 1)	3851453	822853	0.16773	2.8e-08
	1 cell(7, 1)	3361512	332912	0.083813	3.7e-08
	1 cell(8, 1)	5557831	2529231	0.54898	4.9e-08
	1 cell(9, 1)	5906380	2877780	0.644435	6.4e-08
	1 cell(10, 1)	6449380	3420780	0.732747	8.4e-08
	MIN	3028600
FREE	2 cell(1, 1)	7506332	5.1613e+06
	2 cell(2, 1)	7079813	4.73478e+06
	2 cell(3, 1)	7167461	4.82243e+06
	2 cell(4, 1)	6682118	4.33708e+06
	2 cell(5, 1)	6890155	4.54512e+06
	2 cell(6, 1)	6428014	4.08298e+06
	2 cell(7, 1)	5984204	3.63917e+06
	2 cell(8, 1)	4422954	2.07792e+06
	2 cell(9, 1)	3932840	1.5878e+06
	2 cell(10, 1)	3592687	1.24765e+06
	MIN	3592687
	Area Free	33366
	Area Bound	43092
	Back. Free	2.34504e+06
