# Supplementary material for: A novel single alpha-helix DNA-binding domain in CAF-1 promotes gene silencing and DNA damage survival through tetrasome-length DNA selectivity and spacer function
Source: eLife journal article supplement (doi:10.7554/elife.83538), 2023-06-14
Supplement: fig1-data2 [file 211220 Cy5 20 bp EMSA with yKER_Table.xlsx]

## Sheet: 211220 Cy5 20 bp EMSA with yKER
	Name	Volume	Background	Background Level	Background Type	Median Intensity	Average Intensity	Mode Intensity	Std Dev	Variance	Min Intensity	Max Intensity	Percent	Area > Background	Centre X	Centre Y	Width	Height	Area	Comment
	1 cell(1, 1)	3184548	0	0	None	71	70.84	72	8.16	66.57	132	39	2.8	44952	584	1023	137	333	44952
	1 cell(2, 1)	3149830	0	0	None	70	70.59	69	8.13	66.16	138	38	2.77	44619	718	1023	136	333	44619
	1 cell(3, 1)	3180416	0	0	None	71	70.75	70	7.91	62.64	102	35	2.8	44952	851	1023	137	333	44952
	1 cell(4, 1)	3232029	0	0	None	72	72.44	72	9.03	81.52	300	38	2.84	44619	985	1023	136	333	44619
	1 cell(5, 1)	3263304	0	0	None	72	72.6	72	8.29	68.7	140	42	2.87	44952	1118	1023	137	333	44952
	1 cell(6, 1)	3327090	0	0	None	74	74.57	74	10.23	104.59	325	39	2.93	44619	1252	1023	136	333	44619
	1 cell(7, 1)	3851732	0	0	None	78	86.32	73	28.83	831.05	283	42	3.39	44619	1385	1023	136	333	44619
	1 cell(8, 1)	4808423	0	0	None	84	106.97	79	58.25	3393.15	438	43	4.23	44952	1518	1023	137	333	44952
	1 cell(9, 1)	6857739	0	0	None	89	152.56	80	228.6	52257.2	2518	43	6.04	44952	1652	1023	137	333	44952
	1 cell(10, 1)	7904198	0	0	None	94	177.15	88	277.58	77051.4	2556	47	6.96	44619	1786	1023	136	333	44619
	2 cell(1, 1)	8186860	0	0	None	92	188.57	78	259.54	67363.1	1704	37	7.21	43416	589	1355	134	324	43416
	2 cell(2, 1)	8064649	0	0	None	95	185.75	79	241.2	58179.3	1518	47	7.1	43416	723	1355	134	324	43416
	2 cell(3, 1)	8252034	0	0	None	96	191.5	81	251.97	63486.5	1557	46	7.26	43092	856	1355	133	324	43092
	2 cell(4, 1)	8088767	0	0	None	96	186.31	81	237.11	56222.8	1450	51	7.12	43416	990	1355	134	324	43416
	2 cell(5, 1)	8035258	0	0	None	96	185.08	82	228.57	52246.2	1432	51	7.07	43416	1124	1355	134	324	43416
	2 cell(6, 1)	8006255	0	0	None	95	184.41	82	240.17	57683.6	1502	43	7.05	43416	1258	1355	134	324	43416
	2 cell(7, 1)	7521537	0	0	None	94	173.24	78	219.45	48158.1	1462	42	6.62	43416	1392	1355	134	324	43416
	2 cell(8, 1)	5973286	0	0	None	93	138.62	78	123.37	15221.1	775	41	5.26	43092	1525	1355	133	324	43092
	2 cell(9, 1)	4772441	0	0	None	84	109.92	79	95.99	9214.43	749	42	4.2	43416	1659	1355	134	324	43416
	2 cell(10, 1)	3961750	0	0	None	82	91.25	79	36.54	1335.01	351	41	3.49	43416	1793	1355	134	324	43416

## Sheet: Fraction Bound
	Name	Volume	Less Backg.	Fract. Bound	[C]
BOUND	1 cell(1, 1)	3184548	34718	0.00673264	0
	1 cell(2, 1)	3149830	0	0	9e-09
	1 cell(3, 1)	3180416	30586	0.00586195	1.2e-08
	1 cell(4, 1)	3232029	82199	0.0160983	1.6e-08
	1 cell(5, 1)	3263304	113474	0.0223206	2.1e-08
	1 cell(6, 1)	3327090	177260	0.0346305	2.8e-08
	1 cell(7, 1)	3851732	701902	0.136066	3.7e-08
	1 cell(8, 1)	4808423	1658593	0.363171	4.9e-08
	1 cell(9, 1)	6857739	3707909	0.684692	6.4e-08
	1 cell(10, 1)	7904198	4754368	0.841301	8.4e-08
	MIN	3149830
FREE	2 cell(1, 1)	8186860	5.12195e+06
	2 cell(2, 1)	8064649	4.99974e+06
	2 cell(3, 1)	8252034	5.18713e+06
	2 cell(4, 1)	8088767	5.02386e+06
	2 cell(5, 1)	8035258	4.97035e+06
	2 cell(6, 1)	8006255	4.94135e+06
	2 cell(7, 1)	7521537	4.45663e+06
	2 cell(8, 1)	5973286	2.90838e+06
	2 cell(9, 1)	4772441	1.70754e+06
	2 cell(10, 1)	3961750	896844
	MIN	3961750
	Area Free	43416
	Area Bound	44619
	Back. Free	3.06491e+06
