# Supplementary material for: A novel single alpha-helix DNA-binding domain in CAF-1 promotes gene silencing and DNA damage survival through tetrasome-length DNA selectivity and spacer function
Source: eLife journal article supplement (doi:10.7554/elife.83538), 2023-06-14
Supplement: fig1-data2 [file 220217 Table of Kds with single Cy5 DNA_2.xlsx]

## Sheet: Sheet1
Protein	Cy5-DNA	KD [nM]	h
yCAF-1	80 bp	47 ± 13	2.2
yCAF-1	50 bp	63 ± 17	2.2
yCAF-1	40 bp	90 ± 13	2.2
yCAF-1	30 bp	330 ± 21	2.4
yKER	80 bp	18 ± 1	4.1
yKER	40 bp	19 ± 4	4.7
yKER	30 bp	20 ± 4	3.4
yKER	20 bp	49 ± 5	6.3
yWHD	80 bp	120 ± 11	2
yWHD	20 bp	150 ± 8	1.2
