# Supplementary material for: A novel single alpha-helix DNA-binding domain in CAF-1 promotes gene silencing and DNA damage survival through tetrasome-length DNA selectivity and spacer function
Source: eLife journal article supplement (doi:10.7554/elife.83538), 2023-06-14
Supplement: fig1-data2 [file 220324 Cy5 80bp EMSA with yKER 136to225Y_n1_Table.xlsx]

## Sheet: 220324 Cy5 80bp EMSA with yKER 
	Name	Volume	Background	Background Level	Background Type	Median Intensity	Average Intensity	Mode Intensity	Std Dev	Variance	Min Intensity	Max Intensity	Percent	Area > Background	Centre X	Centre Y	Width	Height	Area	Comment
	1 cell(1, 1)	4460823	0	0	None	81	107.87	79	129.98	16895.3	1965	42	5.38	41352	581	1136	137	319	41352
	1 cell(2, 1)	4572258	0	0	None	82	109.74	77	117.43	13788.8	1808	42	5.52	41664	713	1137	138	318	41664
	1 cell(3, 1)	4876471	0	0	None	83	117.93	79	121.62	14790.2	1211	41	5.88	41352	844	1137	137	319	41352
	1 cell(4, 1)	5589078	0	0	None	85	134.15	80	143.83	20686	1245	46	6.74	41664	976	1138	138	318	41664
	1 cell(5, 1)	6046057	0	0	None	86	146.21	77	164.2	26960.6	1406	46	7.29	41352	1107	1138	137	319	41352
	1 cell(6, 1)	6845826	0	0	None	94	165.55	77	160.32	25702.2	1255	47	8.26	41352	1238	1139	137	319	41352
	1 cell(7, 1)	7159131	0	0	None	106	171.83	81	161.08	25947.8	1253	45	8.64	41664	1370	1140	138	318	41664
	1 cell(8, 1)	7443706	0	0	None	113	180.01	84	166.07	27579.8	1514	45	8.98	41352	1501	1140	137	319	41352
	1 cell(9, 1)	7491131	0	0	None	104	179.8	80	196.15	38476.2	1682	45	9.04	41664	1633	1141	138	318	41664
	1 cell(10, 1)	7731486	0	0	None	101	186.97	84	196.96	38794.3	1319	43	9.33	41352	1764	1141	137	319	41352
	2 cell(1, 1)	3546717	0	0	None	134	464.35	76	560.18	313804	2397	48	4.28	7638	568	1324	134	58	7638
	2 cell(2, 1)	3369516	0	0	None	163.5	441.15	84	497.54	247548	2264	58	4.06	7638	702	1325	134	58	7638
	2 cell(3, 1)	2885349	0	0	None	183	380.6	86	378.93	143589	1659	54	3.48	7581	835	1326	133	58	7581
	2 cell(4, 1)	2294836	0	0	None	174.5	300.45	103	266.92	71248.8	1385	58	2.77	7638	969	1327	134	58	7638
	2 cell(5, 1)	1994692	0	0	None	170	261.15	86	198.36	39347.8	794	53	2.41	7638	1103	1328	134	58	7638
	2 cell(6, 1)	1081641	0	0	None	109	141.61	83	67.58	4567.52	326	59	1.3	7638	1237	1328	134	57	7638
	2 cell(7, 1)	894262	0	0	None	99	117.08	77	44.43	1974.25	253	50	1.08	7638	1371	1329	134	58	7638
	2 cell(8, 1)	885919	0	0	None	99	116.86	85	56.34	3173.64	435	47	1.07	7581	1504	1330	133	58	7581
	2 cell(9, 1)	745440	0	0	None	88	97.6	81	28.29	800.33	245	47	0.9	7638	1638	1331	134	58	7638
	2 cell(10, 1)	705205	0	0	None	88	92.33	82	19.45	378.29	169	40	0.85	7638	1772	1332	134	58	7638
	4	2277881	0	0	None	76	76.05	75	8.41	70.77	147	39	2.75	29952	882	1604	192	156	29952

## Sheet: Fraction Bound
	Name	Volume	Area		Less Backg.	Fract. Bound		[C]
BOUND	1 cell(1, 1)	4460823	41352		0	0		0
	1 cell(2, 1)	4572258	41664		111435	0.0384249		9e-09
	1 cell(3, 1)	4876471	41352		415648	0.152562		1.2e-08
	1 cell(4, 1)	5589078	41664		1128255	0.396964		1.6e-08
	1 cell(5, 1)	6046057	41352		1585234	0.528579		2.1e-08
	1 cell(6, 1)	6845826	41352		2385003	0.826471		2.8e-08
	1 cell(7, 1)	7159131	41664		2698308	0.895944		3.7e-08
	1 cell(8, 1)	7443706	41352		2982883	0.906029		4.9e-08
	1 cell(9, 1)	7491131	41664		3030308	0.948492		6.4e-08
	1 cell(10, 1)	7731486	41352		3270663	0.963379		8.4e-08
	Min	4460823
FREE	2 cell(1, 1)	3546717	7638		2.96584e+06
	2 cell(2, 1)	3369516	7638		2.78864e+06
	2 cell(3, 1)	2885349	7581		2.30881e+06
	2 cell(4, 1)	2294836	7638		1.71396e+06
	2 cell(5, 1)	1994692	7638		1.41381e+06
	2 cell(6, 1)	1081641	7638		500763
	2 cell(7, 1)	894262	7638		313384
	2 cell(8, 1)	885919	7581		309376
	2 cell(9, 1)	745440	7638		164562
	2 cell(10, 1)	705205	7638		124327
Backgorund	4	2277881	29952		0
