# Supplementary material for: A novel single alpha-helix DNA-binding domain in CAF-1 promotes gene silencing and DNA damage survival through tetrasome-length DNA selectivity and spacer function
Source: eLife journal article supplement (doi:10.7554/elife.83538), 2023-06-14
Supplement: fig1-data2 [file 220324 Cy5 80bp EMSA with yKER 136to225Y_n2_Table.xlsx]

## Sheet: 220324 Cy5 80bp EMSA with yKER 
	Name	Volume	Background	Background Level	Background Type	Median Intensity	Average Intensity	Mode Intensity	Std Dev	Variance	Min Intensity	Max Intensity	Percent	Area > Background	Centre X	Centre Y	Width	Height	Area	Comment
	1 cell(1, 1)	5246166	0	0	None	75	79.93	75	29.25	855.32	491	34	5.25	65631	578	1272	131	501	65631
	1 cell(2, 1)	5639846	0	0	None	76	85.28	74	43.87	1924.95	534	31	5.64	66132	710	1272	132	501	66132
	1 cell(3, 1)	5899013	0	0	None	76	89.88	73	53.06	2815.02	627	39	5.9	65631	841	1272	131	502	65631
	1 cell(4, 1)	6827344	0	0	None	79	103.24	75	82.86	6865.08	887	37	6.83	66132	973	1271	132	501	66132
	1 cell(5, 1)	7631108	0	0	None	82	116.27	74	96.32	9278.3	887	37	7.63	65631	1104	1271	131	502	65631
	1 cell(6, 1)	8725547	0	0	None	90	132.95	76	101.4	10282.7	787	43	8.73	65631	1235	1270	131	502	65631
	1 cell(7, 1)	8887100	0	0	None	93	134.38	75	105.61	11154	885	40	8.89	66132	1367	1269	132	501	66132
	1 cell(8, 1)	8805622	0	0	None	88	134.17	74	118.51	14045.8	1128	35	8.81	65631	1498	1269	131	502	65631
	1 cell(9, 1)	9009100	0	0	None	88	136.23	77	129.02	16646.7	1187	40	9.01	66132	1630	1268	132	501	66132
	1 cell(10, 1)	9244013	0	0	None	87	140.85	79	140.08	19621.1	1102	36	9.25	65630	1761	1267	131	503	65630
	2 cell(1, 1)	4571113	0	0	None	220	440.63	76	448.82	201443	2145	54	4.57	10374	579	1568	133	78	10374
	2 cell(2, 1)	4024857	0	0	None	194	390.91	80	393.46	154813	1988	58	4.03	10296	712	1568	132	78	10296
	2 cell(3, 1)	3772780	0	0	None	183.5	363.68	91	360.62	130045	1920	54	3.77	10374	844	1567	133	79	10374
	2 cell(4, 1)	2832713	0	0	None	156	275.13	91	243.31	59200.9	1166	53	2.83	10296	977	1567	132	78	10296
	2 cell(5, 1)	2009366	0	0	None	127	193.69	85	143.12	20482.7	685	48	2.01	10374	1109	1566	133	79	10374
	2 cell(6, 1)	1151320	0	0	None	85	110.98	76	51.64	2666.52	276	49	1.15	10374	1242	1565	133	79	10374
	2 cell(7, 1)	1023834	0	0	None	84	99.44	73	37.27	1388.68	227	43	1.02	10296	1375	1565	132	78	10296
	2 cell(8, 1)	922631	0	0	None	79	88.94	71	27.04	730.96	187	47	0.92	10374	1507	1564	133	79	10374
	2 cell(9, 1)	885042	0	0	None	79	85.96	74	22.5	506.18	175	44	0.89	10296	1640	1564	132	78	10296
	2 cell(10, 1)	848016	0	0	None	76	81.75	73	20.33	413.13	168	40	0.85	10373	1772	1563	133	80	10373
	3	2000248	0	0	None	80	80.37	81	9.73	94.75	192	47	2	24888	636	1728	204	122	24888

## Sheet: Fraction Bound
	Name	Volume	Area		Less Backg.	Fract. Bound		[C]
BOUND	1 cell(1, 1)	5246166	65631		0	0		0
	1 cell(2, 1)	5639846	66132		393680	0.109628		9e-09
	1 cell(3, 1)	5899013	65631		652847	0.181757		1.2e-08
	1 cell(4, 1)	6827344	66132		1581178	0.440881		1.6e-08
	1 cell(5, 1)	7631108	65631		2384942	0.669824		2.1e-08
	1 cell(6, 1)	8725547	65631		3479381	0.916364		2.8e-08
	1 cell(7, 1)	8887100	66132		3640934	0.948832		3.7e-08
	1 cell(8, 1)	8805622	65631		3559456	0.97564		4.9e-08
	1 cell(9, 1)	9009100	66132		3762934	0.984936		6.4e-08
	1 cell(10, 1)	9244013	65630		3997847	0.996426		8.4e-08
	MIN	5246166
FREE	2 cell(1, 1)	4571113	10374		3.73735e+06
	2 cell(2, 1)	4024857	10296		3.19737e+06
	2 cell(3, 1)	3772780	10374		2.93902e+06
	2 cell(4, 1)	2832713	10296		2.00522e+06
	2 cell(5, 1)	2009366	10374		1.17561e+06
	2 cell(6, 1)	1151320	10374		317562
	2 cell(7, 1)	1023834	10296		196345
	2 cell(8, 1)	922631	10374		88872.9
	2 cell(9, 1)	885042	10296		57552.7
	2 cell(10, 1)	848016	10373		14338.2
Backgorund	3	2000248	24888		0
