# Supplementary material for: A novel single alpha-helix DNA-binding domain in CAF-1 promotes gene silencing and DNA damage survival through tetrasome-length DNA selectivity and spacer function
Source: eLife journal article supplement (doi:10.7554/elife.83538), 2023-06-14
Supplement: fig1-data2 [file 220324 Cy5 80bp EMSA with yKER 136to225Y_n3_Table.xlsx]

## Sheet: 220324 Cy5 80bp EMSA with yKER 
	Name	Volume	Background	Background Level	Background Type	Median Intensity	Average Intensity	Mode Intensity	Std Dev	Variance	Min Intensity	Max Intensity	Percent	Area > Background	Centre X	Centre Y	Width	Height	Area	Comment
	1 cell(1, 1)	4749305	0	0	None	77	80.98	74	28.37	804.57	1841	36	4.81	58650	543	1268	138	441	58650
	1 cell(2, 1)	4915967	0	0	None	77	84.45	76	34.03	1158.08	560	36	4.98	58209	674	1268	137	441	58209
	1 cell(3, 1)	5113950	0	0	None	77	87.19	72	48.1	2313.82	1965	39	5.18	58650	806	1268	138	441	58650
	1 cell(4, 1)	5976697	0	0	None	79	101.9	72	81.4	6625.96	832	39	6.06	58650	938	1268	138	441	58650
	1 cell(5, 1)	6960687	0	0	None	81	118.68	76	111.88	12517.2	1052	43	7.05	58650	1070	1268	138	441	58650
	1 cell(6, 1)	7989737	0	0	None	88	137.26	74	116.99	13686	956	46	8.09	58209	1201	1268	137	441	58209
	1 cell(7, 1)	8263091	0	0	None	93	140.89	75	121.95	14872.6	923	43	8.37	58650	1333	1268	138	441	58650
	1 cell(8, 1)	8267829	0	0	None	91	140.97	75	130.37	16995.5	1270	38	8.38	58650	1465	1268	138	441	58650
	1 cell(9, 1)	7334826	0	0	None	81	126.01	76	116.03	13463.8	940	40	7.43	58209	1596	1268	137	441	58209
	1 cell(10, 1)	8563677	0	0	None	90	146.01	78	139.43	19442.1	1033	41	8.68	58650	1728	1268	138	441	58650
	2 cell(1, 1)	4864748	0	0	None	193	338.75	88	317.95	101095	1670	50	4.93	14361	541	1546	135	108	14361
	2 cell(2, 1)	4598402	0	0	None	169	320.2	94	303.89	92351.9	1513	55	4.66	14361	673	1546	135	108	14361
	2 cell(3, 1)	4356344	0	0	None	147	303.35	91	301.1	90662.8	1497	56	4.41	14361	805	1546	135	108	14361
	2 cell(4, 1)	3486168	0	0	None	139	242.75	87	213.31	45500.1	1527	54	3.53	14361	937	1546	135	108	14361
	2 cell(5, 1)	2639048	0	0	None	110	183.73	81	141.2	19936.8	793	45	2.67	14364	1069	1545	135	109	14364
	2 cell(6, 1)	1575425	0	0	None	87	109.7	79	45.45	2065.33	388	45	1.6	14361	1201	1545	135	108	14361
	2 cell(7, 1)	1460965	0	0	None	87	101.73	75	34.31	1177.1	204	45	1.48	14361	1333	1545	135	108	14361
	2 cell(8, 1)	1285777	0	0	None	82	89.53	71	23.8	566.51	255	45	1.3	14361	1465	1545	135	108	14361
	2 cell(9, 1)	2042738	0	0	None	110	142.21	77	78.39	6144.33	423	45	2.07	14364	1597	1544	135	109	14364
	2 cell(10, 1)	1160408	0	0	None	78	80.79	73	16.2	262.45	311	41	1.18	14364	1729	1543	135	109	14364
	3	3098016	0	0	None	78	78.09	77	10.26	105.29	323	41	3.14	39672	813	1769	342	116	39672

## Sheet: Fraction Bound
	Name	Volume	Area		Less Backg.	Fract. Bound		[C]
BOUND	1 cell(1, 1)	4749305	58650		0	0		0
	1 cell(2, 1)	4915967	58209		166662	0.045741		9e-09
	1 cell(3, 1)	5113950	58650		364645	0.101304		1.2e-08
	1 cell(4, 1)	5976697	58650		1227392	0.341692		1.6e-08
	1 cell(5, 1)	6960687	58650		2211382	0.593065		2.1e-08
	1 cell(6, 1)	7989737	58209		3240432	0.877121		2.8e-08
	1 cell(7, 1)	8263091	58650		3513786	0.911892		3.7e-08
	1 cell(8, 1)	8267829	58650		3518524	0.955383		4.9e-08
	1 cell(9, 1)	7334826	58209		2585521	0.737338		6.4e-08
	1 cell(10, 1)	8563677	58650		3814372	0.989953		8.4e-08
	MIN	4749305
FREE	2 cell(1, 1)	4864748	14361		3.74329e+06
	2 cell(2, 1)	4598402	14361		3.47694e+06
	2 cell(3, 1)	4356344	14361		3.23488e+06
	2 cell(4, 1)	3486168	14361		2.36471e+06
	2 cell(5, 1)	2639048	14364		1.51735e+06
	2 cell(6, 1)	1575425	14361		453964
	2 cell(7, 1)	1460965	14361		339504
	2 cell(8, 1)	1285777	14361		164316
	2 cell(9, 1)	2042738	14364		921043
	2 cell(10, 1)	1160408	14364		38712.6
Backgorund	3	3098016	39672		0
