# Supplementary material for: A novel single alpha-helix DNA-binding domain in CAF-1 promotes gene silencing and DNA damage survival through tetrasome-length DNA selectivity and spacer function
Source: eLife journal article supplement (doi:10.7554/elife.83538), 2023-06-14
Supplement: fig1-data2 [file Panel l KD calculation.xlsx]

## Sheet: Sheet1
yCAF-1
	30			40			50			80
Data	210921	211001	211004	210921	211001	211004	210921	211001	211004	210921	211001	211004
Kd	329	310	352	98	97	75	61	81	47	42	62	38
h	2.1	2.7	2.5	2	2.4	2.3	2.3	1.8	2.6	2.2	2.2	2.2
	30	40	50	80
AVERAGE, Kd	330.333	90	63	47.3333
STD, Kd	21.0317	13	17.088	12.8582
Average, h	2.43333	2.23333	2.23333	2.2
STD, h	0.305505	0.208167	0.404145	0
yKER
	30			40			80
Data	211118	211119	211122	211118	211119	211122	220324n1	220324n2	220324n3
Kd	24	16	21	16	18	23	19	17	19
h	2.2	4	4	3.1	6.1	4.8	3.7	4	4.5
	30	40	80
AVERAGE, Kd	20.3333	19	18.3333
STD, Kd	4.04145	3.60555	1.1547
Average, h	3.4	4.66667	4.06667
STD, h	1.03923	1.50444	0.404145
	20
Data	211216n1	211216 n2	211220
Kd	49	44	53
h	4.5	9.2	5.1
	20bp
AVERAGE, Kd	48.6667
STD, Kd	4.50925
Average, h	6.26667
STD, h	2.55799
yWHD
	20
Data	211206n1	211206n2	211220
Kd	149	143	159
h	1.1	1.3	1.3
	20
AVERAGE, Kd	150
STD, Kd	8
Average, h	1.2
STD, h	0.1
	80
Data	211026n1	211026n2	211026n3
Kd	108	129	122
h	2.3	1.9	1.9
	80
AVERAGE, Kd	119.667
STD, Kd	10.6927
Average, h	2.03333
STD, h	0.23094
