# Supplementary material for: A novel single alpha-helix DNA-binding domain in CAF-1 promotes gene silencing and DNA damage survival through tetrasome-length DNA selectivity and spacer function
Source: eLife journal article supplement (doi:10.7554/elife.83538), 2023-06-14
Supplement: fig1-data2 [file Silencing T-tests.xlsx]

## Sheet: Sheet1
WT	sir2	rtt106Δ	cac1Δ	rtt106Δcac1Δ	mPIP	mWHD	mPIPmWHD	dKER	dKER + PIP	dKER + WH
2.98	97.8	6.85	7.01	61.1	10.3	7.92	48	6.02	9.14	36.4
2.77	99.7	4.58	6.89	63.6	7.14	8.13	56	7.49	9.86	33.1
2.41	99.9	6.65	6.81	51.8	10.6	4.83	52.7	7.17	11	38.5
0.0113199	7.5737e-08	1	0.294866	0.000134503	0.0661499	0.509452	4.52027e-05	0.36653	0.0117964	6.52915e-05		t test vs rtt106
	***			***			***			***
WT	sir2	rtt106Δ	cac1Δ	rtt106Δcac1Δ	mPIP	mWHD	mPIPmWHD	dKER	dKER + PIP	dKER + WH	d1/2KER	d1/2KER + PIP	d1/2KER + WH
2.07	95.8	4.29	3.51	59.7	7.75	6.16	46.7	4.22	5.99	28.8	4.62	10	39.4
1.36	99.4	2.44	3.81	58.5	7.69	7.67	47.7	3.66	5.62	28.8	3.86	8.22	40.3
0.92	99.9	3.86	3.8	59.2	7.72	7.93	40.5	4.12	7.2	29.8	3.43	7.45	39.3
0.0331584	2.90424e-07	1	0.771136	1.17872e-07	0.00169727	0.00903413	5.7773e-05	0.466725	0.0203245	2.49399e-06	0.540526	0.00588402	6.00464e-07		t test vs rtt106
	***			***	**	**	***			***		**	***
WT	sir2	rtt106Δ	cac1Δ	rtt106Δcac1Δ	mPIP	mWHD	mPIPmWHD	dKER	dKER + PIP	dKER + WH	Human KER	Human KER + PIP	Human KER + WH	2xKER	2xKER + PIP	2xKER + WH
2.39	99.5	4.55	4.55	59.6	5.45	5.26	49.9	5.58	7.84	22.1	4.59	8.93	17.9	4.5	8.36	5.14
1.58	99.8	2.6	3.1	58.9	7.75	4.96	44.1	4.67	5.02	30.7	4.19	8.47	20.5	4.63	7.11	5.18
1.92	99.9	3.8	5.45	60.9	8.61	5.82	44.7	4.15	8.46	24.8	4.69	4.16	19.1	0.8	6.85	3.35
3.03	99.3	1.92	5.12	62.8	5.08	4.31	27.8	5.21	10.9	28.7	4	10.9	24.1	4.1	3.37	4.91
1.58	99.5	5.71	5.02	64.8	9.69	4.08	50.6	5.98	11	25.5	4.16	9.47	19.3	3.48	5.41	4.78
2.72	99.9	4.69	5.86	56	9.13	2.62	44.1	4.44	10.8	27	3.84	9.47	17.7	3.1	3.65	3.6
0.0233838	1.76653e-18	1	0.193502	1.82874e-12	0.00333927	0.411598	3.98169e-07	0.110571	0.00107849	1.35772e-08	0.549107	0.00170032	6.00113e-08	0.599063	0.0846995	0.375529		t test vs rtt106
	***			***	**		***		**	***		**	***
WT	sir2	rtt106Δ	cac1Δ	rtt106Δcac1Δ	mPIP	mWHD	mPIPmWHD	dKER	dKER + PIP	dKER + WH	dRA	dRA + PIP	dRA + WH	145-149Δ	145-149Δ + PIP	145-149Δ + WH 1
1.66	98.9	2.77	3.49	47.4	3.58	6.57	33.8	3.63	6.18	23.9	3.69	5.59	27.3	4.44	6.73	16.3
1	99.8	3.56	4.68	51.6	5.86	4.26	35.1	4.89	6	33	3.92	8.64	32.2	3.41	7.09	24.5
0.91	99.9	2.86	4.32	67.8	5.5	2.13	39.4	5.4	6.96	30.6	3.44	7.16	14.2	3.62	6.89	18.1
1.6	99.3	1.98	4.6	72.1	4.08	6.14	44.2	3.82	6.07	28.9	4.23	8.12	27.6	3.62	5.91	18.9
1.54	99.8	2.93	4.69	72.6	8.57	5.31	46.3	3.43	6.22	24.9	4.16	9.31	19.8	3.97	10.4	19.2
1.57	99.7	3.55	5.98	56.3	9.23	2.57	44.6	3.67	5.17	28.8	5.35	8.08	28.6	10.2	11.2	16.3
0.000203666	1.30349e-21	1	0.0019707	1.32932e-07	0.00827793	0.0774935	8.57228e-09	0.0145404	2.65828e-06	6.41286e-09	0.00815992	7.89035e-06	1.07178e-05	0.109379	0.000261872	1.7201e-07		t test vs rtt106
***	***		**	***	**		***		***	***	**	***	***		***	***
WT	sir2Δ	cac1Δ	Cac1 WT	cac1Δ	mWHD	dKER	dKER + mWHD	d225-6	d225-6 + mWHD	d145-149	d145-9 + mWHD	2xKER	2xKER + mWHD
2.1	95	3.89	4.87	62.9	3.43	2.39	29.2	6.8	19.8	4.86	13.7	5.01	2.54
2.38	99.4	4.62	5.22	58.4	6.52	4.67	32.9	5.32	16.9	6.24	15.6	6.14	4.98
1.82	99.5	3.69	4.18	46	5.56	3.93	31.1	5.39	32.1	4.58	15	6.17	3.01
							33.5
0.0015413	4.17731e-07	0.172686	1	0.000545709	0.689825	0.212492	1.8857e-05	0.131409	0.017647	0.475255	9.67372e-05	0.106117	0.197479
