# Supplementary material for: A novel single alpha-helix DNA-binding domain in CAF-1 promotes gene silencing and DNA damage survival through tetrasome-length DNA selectivity and spacer function
Source: eLife journal article supplement (doi:10.7554/elife.83538), 2023-06-14
Supplement: fig1-figsupp3-data1 [file 211026 Cy5 80 bp EMSA with yWHD 457to606_n1__Table.xlsx]

## Sheet: 211026 Cy5 80 bp EMSA with yWHD
	Name	Volume	Background	Background Level	Background Type	Median Intensity	Average Intensity	Mode Intensity	Std Dev	Variance	Min Intensity	Max Intensity	Percent	Area > Background	Centre X	Centre Y	Width	Height	Area	Comment
	1 cell(1, 1)	1805107	0	0	None	51	52.22	51	10.11	102.18	109	16	2.56	34569	509	1100	136	258	34569
	1 cell(2, 1)	1811541	0	0	None	51	52.4	50	12.31	151.53	141	18	2.57	34569	642	1100	136	258	34569
	1 cell(3, 1)	2232738	0	0	None	54	64.58	51	43.68	1908.19	488	20	3.17	34572	775	1099	136	259	34572
	1 cell(4, 1)	2268798	0	0	None	55	65.63	51	46.39	2151.88	512	22	3.22	34569	908	1099	136	258	34569
	1 cell(5, 1)	2834287	0	0	None	59	81.98	55	81.95	6715.88	779	15	4.02	34572	1041	1098	136	259	34572
	1 cell(6, 1)	3327520	0	0	None	64	96.97	59	103.54	10720.3	939	22	4.72	34314	1173	1097	135	259	34314
	1 cell(7, 1)	4001836	0	0	None	74	115.76	50	123.42	15231.9	979	27	5.68	34569	1306	1097	136	258	34569
	1 cell(8, 1)	5359399	0	0	None	109	155.02	51	169.72	28806.1	1434	17	7.61	34572	1439	1096	136	259	34572
	1 cell(9, 1)	5782246	0	0	None	66	167.27	60	493.21	243257	9665	20	8.21	34569	1572	1096	136	258	34569
	1 cell(10, 1)	6269508	0	0	None	54	181.34	51	703.68	495166	14790	23	8.9	34574	1705	1095	136	260	34574
	2 cell(1, 1)	5382205	0	0	None	75	281.03	59	455.47	207457	2513	26	7.64	19152	510	1340	133	144	19152
	2 cell(2, 1)	5035440	0	0	None	73	264.91	56	427.39	182661	2410	25	7.15	19008	643	1340	132	144	19008
	2 cell(3, 1)	4502240	0	0	None	74	235.08	56	356.09	126802	1955	30	6.39	19152	775	1340	133	144	19152
	2 cell(4, 1)	4828936	0	0	None	77	254.05	57	387.07	149826	2173	30	6.85	19008	908	1340	132	144	19008
	2 cell(5, 1)	4297637	0	0	None	78	224.4	57	306.07	93675.8	1569	30	6.1	19152	1040	1340	133	144	19152
	2 cell(6, 1)	3797294	0	0	None	76	198.27	59	262.72	69021	1453	30	5.39	19152	1173	1340	133	144	19152
	2 cell(7, 1)	3104266	0	0	None	75	163.31	57	195.31	38147.7	957	28	4.41	19008	1306	1340	132	144	19008
	2 cell(8, 1)	1507105	0	0	None	63	78.69	55	42	1763.98	277	25	2.14	19152	1438	1340	133	144	19152
	2 cell(9, 1)	1239268	0	0	None	58	65.2	55	24.87	618.4	202	23	1.76	19008	1571	1340	132	144	19008
	2 cell(10, 1)	1057488	0	0	None	54	55.22	52	11.57	133.9	111	20	1.5	19152	1703	1340	133	144	19152

## Sheet: Fraction Bound
	Name	Volume	Less Backg.	Fract. Bound	[C]
BOUND	1 cell(1, 1)	1805107	0	0	0
	1 cell(2, 1)	1811541	6434	0.00159186	1.2e-08
	1 cell(3, 1)	2232738	427631	0.108817	3.7e-08
	1 cell(4, 1)	2268798	463691	0.108022	4.9e-08
	1 cell(5, 1)	2834287	1029180	0.237865	6.4e-08
	1 cell(6, 1)	3327520	1522413	0.35244	8.4e-08
	1 cell(7, 1)	4001836	2196729	0.510757	1.1e-07
	1 cell(8, 1)	5359399	3554292	0.875155	2.5e-07
	1 cell(9, 1)	5782246	3977139	0.943269	4.4e-07
	1 cell(10, 1)	6269508	4464401	0.987302	7.6e-07
	MIN	1805107
FREE	2 cell(1, 1)	5382205	4.38214e+06
	2 cell(2, 1)	5035440	4.03537e+06
	2 cell(3, 1)	4502240	3.50217e+06
	2 cell(4, 1)	4828936	3.82887e+06
	2 cell(5, 1)	4297637	3.29757e+06
	2 cell(6, 1)	3797294	2.79722e+06
	2 cell(7, 1)	3104266	2.1042e+06
	2 cell(8, 1)	1507105	507035
	2 cell(9, 1)	1239268	239198
	2 cell(10, 1)	1057488	57418.3
	MIN
	Area Free	19152
	Area Bound	34569
	Back. Free	1.00007e+06
