# Supplementary material for: A novel single alpha-helix DNA-binding domain in CAF-1 promotes gene silencing and DNA damage survival through tetrasome-length DNA selectivity and spacer function
Source: eLife journal article supplement (doi:10.7554/elife.83538), 2023-06-14
Supplement: fig1-figsupp3-data1 [file 211026 Cy5 80 bp EMSA with yWHD 457to606_n2__Table.xlsx]

## Sheet: 211026 Cy5 80 bp EMSA with yWHD
	Name	Volume	Background	Background Level	Background Type	Median Intensity	Average Intensity	Mode Intensity	Std Dev	Variance	Min Intensity	Max Intensity	Percent	Area > Background	Centre X	Centre Y	Width	Height	Area	Comment
	1 cell(1, 1)	1742586	0	0	None	50	51.56	51	27.94	780.39	2094	19	2.44	33798	485	1098	131	258	33798
	1 cell(2, 1)	1793550	0	0	None	50	52.66	48	26.99	728.66	1930	17	2.51	34056	617	1098	132	258	34056
	1 cell(3, 1)	2254209	0	0	None	53	66.7	50	52.98	2806.55	575	20	3.15	33798	748	1098	131	258	33798
	1 cell(4, 1)	2367488	0	0	None	54	69.52	51	59.16	3499.8	625	19	3.31	34056	880	1098	132	258	34056
	1 cell(5, 1)	2529330	0	0	None	56	74.84	53	69.06	4768.77	659	20	3.53	33798	1011	1098	131	258	33798
	1 cell(6, 1)	3143362	0	0	None	61	93	52	101.46	10295	909	20	4.39	33798	1142	1098	131	258	33798
	1 cell(7, 1)	3797188	0	0	None	68	111.5	52	130.32	16982.3	1078	21	5.31	34056	1274	1098	132	258	34056
	1 cell(8, 1)	5338556	0	0	None	106	157.95	49	180.56	32601.1	1343	25	7.46	33798	1405	1098	131	258	33798
	1 cell(9, 1)	6354322	0	0	None	63	186.58	54	582.68	339517	9985	22	8.88	34056	1537	1098	132	258	34056
	1 cell(10, 1)	5636944	0	0	None	52	166.78	49	632.91	400576	11710	17	7.88	33798	1668	1098	131	258	33798
	2 cell(1, 1)	5004891	0	0	None	72	244.91	54	377.37	142409	2113	20	6.99	20436	488	1334	131	156	20436
	2 cell(2, 1)	5293259	0	0	None	73	259.02	57	395.11	156109	2149	24	7.4	20436	619	1334	131	156	20436
	2 cell(3, 1)	4871315	0	0	None	74	240.2	59	358.26	128353	2003	23	6.81	20280	750	1334	130	156	20280
	2 cell(4, 1)	4861531	0	0	None	78	237.89	58	342.39	117230	1946	28	6.79	20436	880	1334	131	156	20436
	2 cell(5, 1)	4738513	0	0	None	77	231.87	59	331.31	109766	1849	32	6.62	20436	1011	1334	131	156	20436
	2 cell(6, 1)	4020145	0	0	None	77	196.72	57	258.91	67034.5	1477	28	5.62	20436	1142	1334	131	156	20436
	2 cell(7, 1)	3491364	0	0	None	74	170.84	59	208.48	43463.2	1076	28	4.88	20436	1273	1334	131	156	20436
	2 cell(8, 1)	2008492	0	0	None	66	99.04	55	76.71	5884.09	438	16	2.81	20280	1404	1334	130	156	20280
	2 cell(9, 1)	1210854	0	0	None	55	59.25	54	17.14	293.86	141	21	1.69	20436	1534	1334	131	156	20436
	2 cell(10, 1)	1098321	0	0	None	52	53.74	52	13.49	182	435	13	1.53	20436	1665	1334	131	156	20436

## Sheet: Fraction Bound
	Name	Volume	Less Backg.	Fract. Bound	[C]
BOUND	1 cell(1, 1)	1742586	0	0	0
	1 cell(2, 1)	1793550	50964	0.0118782	1.2e-08
	1 cell(3, 1)	2254209	511623	0.118177	3.7e-08
	1 cell(4, 1)	2367488	624902	0.140973	4.9e-08
	1 cell(5, 1)	2529330	786744	0.175942	6.4e-08
	1 cell(6, 1)	3143362	1400776	0.320744	8.4e-08
	1 cell(7, 1)	3797188	2054602	0.45736	1.1e-07
	1 cell(8, 1)	5338556	3595970	0.790183	2.5e-07
	1 cell(9, 1)	6354322	4611736	0.967037	4.4e-07
	1 cell(10, 1)	5636944	3894358	0.988661	7.6e-07
	MIN	1742586
FREE	2 cell(1, 1)	5004891	3.95123e+06
	2 cell(2, 1)	5293259	4.2396e+06
	2 cell(3, 1)	4871315	3.81766e+06
	2 cell(4, 1)	4861531	3.80787e+06
	2 cell(5, 1)	4738513	3.68486e+06
	2 cell(6, 1)	4020145	2.96649e+06
	2 cell(7, 1)	3491364	2.43771e+06
	2 cell(8, 1)	2008492	954835
	2 cell(9, 1)	1210854	157197
	2 cell(10, 1)	1098321	44664.3
	MIN
	Area Free	20436
	Area Bound	33798
	Back. Free	1.05366e+06
