# Supplementary material for: A novel single alpha-helix DNA-binding domain in CAF-1 promotes gene silencing and DNA damage survival through tetrasome-length DNA selectivity and spacer function
Source: eLife journal article supplement (doi:10.7554/elife.83538), 2023-06-14
Supplement: fig1-figsupp3-data1 [file 211026 Cy5 80 bp EMSA with yWHD 457to606_n3__Table.xlsx]

## Sheet: 211026 Cy5 80 bp EMSA with yWHD
	Name	Volume	Background	Background Level	Background Type	Median Intensity	Average Intensity	Mode Intensity	Std Dev	Variance	Min Intensity	Max Intensity	Percent	Area > Background	Centre X	Centre Y	Width	Height	Area	Comment
	1 cell(1, 1)	2010131	0	0	None	52	52.73	50	9.99	99.7	103	14	2.83	38121	464	1075	131	292	38121
	1 cell(2, 1)	2041388	0	0	None	51	53.14	49	13.15	172.8	157	20	2.88	38412	596	1074	132	292	38412
	1 cell(3, 1)	2410012	0	0	None	53	63.22	51	42.55	1810.79	510	18	3.4	38120	727	1072	131	293	38120
	1 cell(4, 1)	2515659	0	0	None	54	65.49	52	47.29	2236.12	529	19	3.55	38412	859	1071	132	292	38412
	1 cell(5, 1)	2809678	0	0	None	55	73.71	54	67.59	4568.02	723	20	3.96	38120	990	1069	131	293	38120
	1 cell(6, 1)	3513273	0	0	None	62	92.16	53	98.45	9692.47	902	17	4.95	38121	1121	1068	131	292	38121
	1 cell(7, 1)	3972403	0	0	None	66	103.42	51	113.47	12875.4	972	25	5.6	38412	1253	1066	132	293	38412
	1 cell(8, 1)	5235091	0	0	None	89	137.33	50	149.12	22236.3	1111	22	7.38	38121	1384	1065	131	292	38121
	1 cell(9, 1)	6063767	0	0	None	63	157.86	55	509.01	259087	9862	19	8.55	38412	1516	1063	132	293	38412
	1 cell(10, 1)	5697642	0	0	None	51	149.47	49	606.24	367529	14468	17	8.03	38120	1647	1061	131	293	38120
	2 cell(1, 1)	5407647	0	0	None	84	317.57	56	486.07	236268	2749	24	7.62	17028	462	1305	132	129	17028
	2 cell(2, 1)	5107494	0	0	None	83	299.95	56	457.66	209450	2520	27	7.2	17028	594	1305	132	129	17028
	2 cell(3, 1)	4519584	0	0	None	79	265.42	58	384.6	147916	2108	26	6.37	17028	726	1305	132	129	17028
	2 cell(4, 1)	4516418	0	0	None	80	265.23	59	384.91	148154	2088	19	6.36	17028	858	1305	132	129	17028
	2 cell(5, 1)	4312903	0	0	None	81	253.28	59	352.02	123921	1903	29	6.08	17028	990	1305	132	129	17028
	2 cell(6, 1)	3608657	0	0	None	81	211.92	61	267.28	71440.7	1412	29	5.09	17028	1122	1305	132	129	17028
	2 cell(7, 1)	3152295	0	0	None	77	185.12	58	221.7	49149.2	1114	27	4.44	17028	1254	1305	132	129	17028
	2 cell(8, 1)	1837389	0	0	None	69	107.9	57	85.8	7361.53	499	25	2.59	17028	1386	1305	132	129	17028
	2 cell(9, 1)	1253172	0	0	None	62	73.59	52	32.09	1029.81	204	22	1.77	17028	1518	1305	132	129	17028
	2 cell(10, 1)	973671	0	0	None	54	57.18	51	16.62	276.22	139	23	1.37	17028	1650	1305	132	129	17028

## Sheet: Fraction Bound
	Name	Volume	Less Backg.	Fract. Bound	[C]
BOUND	1 cell(1, 1)	2010131	0	0	0
	1 cell(2, 1)	2041388	31257	0.00737044	1.2e-08
	1 cell(3, 1)	2410012	399881	0.099434	3.7e-08
	1 cell(4, 1)	2515659	505528	0.12258	4.9e-08
	1 cell(5, 1)	2809678	799547	0.189711	6.4e-08
	1 cell(6, 1)	3513273	1503142	0.35671	8.4e-08
	1 cell(7, 1)	3972403	1962272	0.46536	1.1e-07
	1 cell(8, 1)	5235091	3224960	0.774401	2.5e-07
	1 cell(9, 1)	6063767	4053636	0.919418	4.4e-07
	1 cell(10, 1)	5697642	3687511	0.979863	7.6e-07
	MIN	2010131
FREE	2 cell(1, 1)	5407647	4.50976e+06
	2 cell(2, 1)	5107494	4.2096e+06
	2 cell(3, 1)	4519584	3.62169e+06
	2 cell(4, 1)	4516418	3.61853e+06
	2 cell(5, 1)	4312903	3.41501e+06
	2 cell(6, 1)	3608657	2.71077e+06
	2 cell(7, 1)	3152295	2.2544e+06
	2 cell(8, 1)	1837389	939498
	2 cell(9, 1)	1253172	355281
	2 cell(10, 1)	973671	75779.8
	MIN
	Area Free	17028
	Area Bound	38121
	Back. Free	897891
