# Supplementary material for: A novel single alpha-helix DNA-binding domain in CAF-1 promotes gene silencing and DNA damage survival through tetrasome-length DNA selectivity and spacer function
Source: eLife journal article supplement (doi:10.7554/elife.83538), 2023-06-14
Supplement: fig1-figsupp3-data1 [file 211206 Cy5 20bp EMSA with yWHD_n1_Table.xlsx]

## Sheet: 211206 Cy5 20bp EMSA with yWHD_
	Name	Volume	Background	Background Level	Background Type	Median Intensity	Average Intensity	Mode Intensity	Std Dev	Variance	Min Intensity	Max Intensity	Percent	Area > Background	Centre X	Centre Y	Width	Height	Area	Comment
	1 cell(1, 1)	1788737	0	0	None	46	45.72	46	8.05	64.75	80	7	2.09	39128	447	1099	134	292	39128
	1 cell(2, 1)	1773162	0	0	None	45	45.32	45	7.79	60.65	99	15	2.07	39128	581	1099	134	292	39128
	1 cell(3, 1)	2307644	0	0	None	48	58.98	46	49.64	2464.52	520	17	2.7	39128	715	1099	134	292	39128
	1 cell(4, 1)	2289041	0	0	None	49	58.5	47	46.58	2169.35	547	11	2.67	39128	849	1099	134	292	39128
	1 cell(5, 1)	3131876	0	0	None	51	80.04	49	107.83	11626.3	952	18	3.66	39128	983	1099	134	292	39128
	1 cell(6, 1)	3668284	0	0	None	53	93.75	52	132.59	17579	1064	17	4.29	39128	1117	1099	134	292	39128
	1 cell(7, 1)	3555292	0	0	None	53	90.86	47	128.38	16481.9	1043	18	4.15	39128	1251	1099	134	292	39128
	1 cell(8, 1)	4237397	0	0	None	55	108.3	48	147.91	21878.5	1115	18	4.95	39128	1385	1099	134	292	39128
	1 cell(9, 1)	4544099	0	0	None	57	116.13	49	152.68	23310.3	1098	20	5.31	39128	1519	1099	134	292	39128
	1 cell(10, 1)	5728199	0	0	None	71	146.4	50	167.09	27917.5	1017	19	6.69	39128	1653	1099	134	292	39128
	2 cell(1, 1)	6486678	0	0	None	56	180.67	49	346.3	119923	2365	21	7.58	35904	454	1385	132	272	35904
	2 cell(2, 1)	6830002	0	0	None	61	190.23	50	345.62	119456	2227	14	7.98	35904	586	1385	132	272	35904
	2 cell(3, 1)	6200000	0	0	None	65	172.68	50	312.78	97833.4	2003	17	7.24	35904	718	1385	132	272	35904
	2 cell(4, 1)	6503604	0	0	None	66	181.14	52	325.33	105840	2095	25	7.6	35904	850	1385	132	272	35904
	2 cell(5, 1)	5539706	0	0	None	69	154.29	53	269.38	72567.5	1781	22	6.47	35904	982	1385	132	272	35904
	2 cell(6, 1)	4944808	0	0	None	72	137.72	56	223.61	50003.7	1594	17	5.78	35904	1114	1385	132	272	35904
	2 cell(7, 1)	4854648	0	0	None	69	135.21	53	221.72	49159	1589	22	5.67	35904	1246	1385	132	272	35904
	2 cell(8, 1)	4255838	0	0	None	71	118.53	54	165.91	27526.7	1225	23	4.97	35904	1378	1385	132	272	35904
	2 cell(9, 1)	4052364	0	0	None	72	112.87	58	151.17	22852.4	1168	24	4.74	35904	1510	1385	132	272	35904
	2 cell(10, 1)	2888707	0	0	None	74	80.46	51	39.07	1526.6	317	19	3.38	35904	1642	1385	132	272	35904

## Sheet: Fraction Bound
	Name	Volume	Less Backg.	Fract. Bound	[C]
BOUND	1 cell(1, 1)	1788737	15575	0.00319475	0
	1 cell(2, 1)	1773162	0	0	1.2e-08
	1 cell(3, 1)	2307644	534482	0.104648	3.7e-08
	1 cell(4, 1)	2289041	515879	0.0956674	4.9e-08
	1 cell(5, 1)	3131876	1358714	0.257754	6.4e-08
	1 cell(6, 1)	3668284	1895122	0.363547	8.4e-08
	1 cell(7, 1)	3555292	1782130	0.355735	1.1e-07
	1 cell(8, 1)	4237397	2464235	0.483846	2.5e-07
	1 cell(9, 1)	4544099	2770937	0.533258	4.4e-07
	1 cell(10, 1)	5728199	3955037	0.758152	7.6e-07
	MIN	1773162
FREE	2 cell(1, 1)	6486678	4.85962e+06
	2 cell(2, 1)	6830002	5.20294e+06
	2 cell(3, 1)	6200000	4.57294e+06
	2 cell(4, 1)	6503604	4.87654e+06
	2 cell(5, 1)	5539706	3.91265e+06
	2 cell(6, 1)	4944808	3.31775e+06
	2 cell(7, 1)	4854648	3.22759e+06
	2 cell(8, 1)	4255838	2.62878e+06
	2 cell(9, 1)	4052364	2.4253e+06
	2 cell(10, 1)	2888707	1.26165e+06
	MIN
	Area Free	35904
	Area Bound	39128
	Back. Free	1.62706e+06
