# Supplementary material for: A novel single alpha-helix DNA-binding domain in CAF-1 promotes gene silencing and DNA damage survival through tetrasome-length DNA selectivity and spacer function
Source: eLife journal article supplement (doi:10.7554/elife.83538), 2023-06-14
Supplement: fig1-figsupp3-data1 [file 211206 Cy5 20bp EMSA with yWHD_n2_Table.xlsx]

## Sheet: 211206 Cy5 20bp EMSA with yWHD_
	Name	Volume	Background	Background Level	Background Type	Median Intensity	Average Intensity	Mode Intensity	Std Dev	Variance	Min Intensity	Max Intensity	Percent	Area > Background	Centre X	Centre Y	Width	Height	Area	Comment
	1 cell(1, 1)	1904108	0	0	None	45	45.31	45	7.77	60.45	82	9	2.22	42028	446	1079	133	316	42028
	1 cell(2, 1)	1910953	0	0	None	45	45.47	44	7.69	59.2	83	15	2.23	42028	579	1079	133	316	42028
	1 cell(3, 1)	2177714	0	0	None	47	52.21	46	28.67	822.2	345	15	2.54	41712	712	1079	132	316	41712
	1 cell(4, 1)	2524987	0	0	None	48	60.08	46	54.23	2940.99	601	16	2.95	42028	844	1079	133	316	42028
	1 cell(5, 1)	2785149	0	0	None	49	66.27	46	70.75	5005.59	689	19	3.25	42028	977	1079	133	316	42028
	1 cell(6, 1)	3700553	0	0	None	53	88.05	50	122.6	15030.8	1139	21	4.32	42028	1110	1079	133	316	42028
	1 cell(7, 1)	3917369	0	0	None	55	93.21	48	133.84	17914	1196	20	4.57	42028	1243	1079	133	316	42028
	1 cell(8, 1)	4619343	0	0	None	59	110.74	55	150.65	22696.8	1271	21	5.39	41712	1376	1079	132	316	41712
	1 cell(9, 1)	4677634	0	0	None	57	111.3	51	150.66	22698.1	1229	15	5.46	42028	1508	1079	133	316	42028
	1 cell(10, 1)	5989722	0	0	None	73	142.52	52	157.34	24757.2	905	18	6.99	42028	1641	1079	133	316	42028
	2 cell(1, 1)	6774139	0	0	None	67	208.51	52	380.63	144879	2395	15	7.9	32488	461	1369	131	248	32488
	2 cell(2, 1)	6710766	0	0	None	71	206.56	55	359.39	129158	2246	23	7.83	32488	592	1368	131	249	32488
	2 cell(3, 1)	6331825	0	0	None	73	193.42	55	338.99	114917	2151	23	7.39	32736	724	1368	132	248	32736
	2 cell(4, 1)	6381015	0	0	None	78	196.41	54	348.56	121494	2200	27	7.44	32488	855	1367	131	249	32488
	2 cell(5, 1)	5391285	0	0	None	70	165.95	55	275.98	76164.7	1678	24	6.29	32488	986	1366	131	249	32488
	2 cell(6, 1)	4842755	0	0	None	74	149.06	55	253.72	64375.6	1758	24	5.65	32488	1117	1365	131	249	32488
	2 cell(7, 1)	4587912	0	0	None	72	141.22	54	237.63	56466.9	1573	25	5.35	32488	1248	1364	131	249	32488
	2 cell(8, 1)	4074756	0	0	None	72	124.47	57	185.23	34309.5	1332	21	4.75	32736	1380	1364	132	248	32736
	2 cell(9, 1)	3930220	0	0	None	72	120.97	56	178.71	31938	1372	26	4.58	32488	1511	1363	131	249	32488
	2 cell(10, 1)	2487681	0	0	None	74	76.57	81	33.79	1141.8	298	16	2.9	32487	1642	1362	131	250	32487

## Sheet: Fraction Bound
	Name	Volume	Less Backg.	Fract. Bound	[C]
BOUND	1 cell(1, 1)	1904108	0	0	0
	1 cell(2, 1)	1910953	6845	0.00130486	1.2e-08
	1 cell(3, 1)	2177714	273606	0.0532973	3.7e-08
	1 cell(4, 1)	2524987	620879	0.112274	4.9e-08
	1 cell(5, 1)	2785149	881041	0.183532	6.4e-08
	1 cell(6, 1)	3700553	1796445	0.347653	8.4e-08
	1 cell(7, 1)	3917369	2013261	0.3925	1.1e-07
	1 cell(8, 1)	4619343	2715235	0.510561	2.5e-07
	1 cell(9, 1)	4677634	2773526	0.530118	4.4e-07
	1 cell(10, 1)	5989722	4085614	0.800873	7.6e-07
	MIN	1904108
FREE	2 cell(1, 1)	6774139	5.30229e+06
	2 cell(2, 1)	6710766	5.23892e+06
	2 cell(3, 1)	6331825	4.85998e+06
	2 cell(4, 1)	6381015	4.90917e+06
	2 cell(5, 1)	5391285	3.91944e+06
	2 cell(6, 1)	4842755	3.37091e+06
	2 cell(7, 1)	4587912	3.11607e+06
	2 cell(8, 1)	4074756	2.60291e+06
	2 cell(9, 1)	3930220	2.45837e+06
	2 cell(10, 1)	2487681	1.01583e+06
	MIN
	Area Free	32487
	Area Bound	42028
	Back. Free	1.47185e+06
