# Supplementary material for: A novel single alpha-helix DNA-binding domain in CAF-1 promotes gene silencing and DNA damage survival through tetrasome-length DNA selectivity and spacer function
Source: eLife journal article supplement (doi:10.7554/elife.83538), 2023-06-14
Supplement: fig1-figsupp3-data1 [file 211220 Cy5 20 bp EMSA with yWHD_Table.xlsx]

## Sheet: 211220 Cy5 20 bp EMSA with yWHD
	Name	Volume	Background	Background Level	Background Type	Median Intensity	Average Intensity	Mode Intensity	Std Dev	Variance	Min Intensity	Max Intensity	Percent	Area > Background	Centre X	Centre Y	Width	Height	Area	Comment
	1 cell(1, 1)	1728836	0	0	None	48	47.61	48	7.63	58.26	78	15	2.07	36309	513	1099	133	273	36309
	1 cell(2, 1)	1733364	0	0	None	47	47.74	48	8.21	67.38	126	17	2.07	36309	646	1099	133	273	36309
	1 cell(3, 1)	2246136	0	0	None	49	61.86	47	59.24	3508.88	747	18	2.68	36309	779	1099	133	273	36309
	1 cell(4, 1)	2424202	0	0	None	50	66.77	47	73.6	5417.31	862	19	2.9	36309	912	1099	133	273	36309
	1 cell(5, 1)	2897862	0	0	None	52	79.81	49	113.79	12948.1	1298	22	3.46	36309	1045	1099	133	274	36309
	1 cell(6, 1)	3200064	0	0	None	54	88.8	50	129.83	16854.6	1378	20	3.82	36036	1178	1098	132	273	36036
	1 cell(7, 1)	3539926	0	0	None	55	97.49	50	166.49	27717.5	1884	18	4.23	36309	1310	1098	133	273	36309
	1 cell(8, 1)	3708443	0	0	None	57	102.14	48	135.13	18260.6	978	19	4.43	36309	1443	1098	133	273	36309
	1 cell(9, 1)	5460979	0	0	None	70	150.4	50	176.77	31246.6	959	18	6.53	36309	1576	1098	133	274	36309
	1 cell(10, 1)	5727800	0	0	None	75	157.75	61	173.79	30203.9	2367	24	6.84	36309	1709	1097	133	274	36309
	2 cell(1, 1)	6980056	0	0	None	66	159.3	54	256.27	65672.5	1738	24	8.34	43818	526	1405	134	327	43818
	2 cell(2, 1)	7061903	0	0	None	67	162.38	56	261.31	68284.8	1789	19	8.44	43491	659	1405	133	327	43491
	2 cell(3, 1)	6282872	0	0	None	68	143.39	55	214.67	46084.2	1394	19	7.51	43818	793	1405	134	328	43818
	2 cell(4, 1)	6199760	0	0	None	69	142.55	56	210.06	44123.1	1385	26	7.41	43491	926	1404	133	327	43491
	2 cell(5, 1)	5676041	0	0	None	70	129.54	55	177.9	31649.3	1172	22	6.78	43818	1060	1404	134	328	43818
	2 cell(6, 1)	4876377	0	0	None	71	112.12	55	126.2	15926	849	24	5.83	43491	1193	1403	133	328	43491
	2 cell(7, 1)	5063874	0	0	None	68	116.43	54	158.31	25062	1060	23	6.05	43491	1326	1402	133	327	43491
	2 cell(8, 1)	3306022	0	0	None	72	75.45	50	27.49	755.7	200	20	3.95	43818	1460	1402	134	328	43818
	2 cell(9, 1)	3033595	0	0	None	65	69.23	49	26.9	723.75	217	19	3.62	43818	1594	1401	134	327	43818
	2 cell(10, 1)	2544189	0	0	None	58	58.5	50	13.99	195.64	191	19	3.04	43490	1727	1400	133	329	43490

## Sheet: Fraction Bound
	Name	Volume	Less Backg.	Fract. Bound	[C]
BOUND	1 cell(1, 1)	1728836	0	0	0
	1 cell(2, 1)	1733364	4528	0.000906384	1.2e-08
	1 cell(3, 1)	2246136	517300	0.109379	3.7e-08
	1 cell(4, 1)	2424202	695366	0.144136	4.9e-08
	1 cell(5, 1)	2897862	1169026	0.244858	6.4e-08
	1 cell(6, 1)	3200064	1471228	0.343998	8.4e-08
	1 cell(7, 1)	3539926	1811090	0.37698	1.1e-07
	1 cell(8, 1)	3708443	1979607	0.615765	2.5e-07
	1 cell(9, 1)	5460979	3732143	0.794922	4.4e-07
	1 cell(10, 1)	5727800	3998964	0.894143	7.6e-07
	MIN	1728836
FREE	2 cell(1, 1)	6980056	4.9093e+06
	2 cell(2, 1)	7061903	4.99115e+06
	2 cell(3, 1)	6282872	4.21212e+06
	2 cell(4, 1)	6199760	4.129e+06
	2 cell(5, 1)	5676041	3.60529e+06
	2 cell(6, 1)	4876377	2.80562e+06
	2 cell(7, 1)	5063874	2.99312e+06
	2 cell(8, 1)	3306022	1.23527e+06
	2 cell(9, 1)	3033595	962839
	2 cell(10, 1)	2544189	473433
	MIN
	Area Free	43490
	Area Bound	36309
	Back. Free	2.07076e+06
