# Supplementary material for: A novel single alpha-helix DNA-binding domain in CAF-1 promotes gene silencing and DNA damage survival through tetrasome-length DNA selectivity and spacer function
Source: eLife journal article supplement (doi:10.7554/elife.83538), 2023-06-14
Supplement: fig2-data1 [file 190827 CD experiments with KER and 40 bp 601.xlsx]

## Sheet: KER Apo
KER apo				KER apo post Melting
Wavelength [nm]	CD [mdeg]	HT [V]		Wavelength [nm]	CD [mdeg]	HT [V]
350	0.444977	260.552		350	0.521753	261.704
349	0.46217	260.564		349	0.454515	261.725
348	0.481202	260.569		348	0.393051	261.733
347	0.469757	260.553		347	0.412957	261.716
346	0.487665	260.525		346	0.450645	261.684
345	0.462486	260.467		345	0.505477	261.635
344	0.45101	260.41		344	0.519334	261.59
343	0.463144	260.346		343	0.470713	261.537
342	0.425928	260.307		342	0.382585	261.504
341	0.392439	260.272		341	0.264936	261.473
340	0.322443	260.252		340	0.281787	261.455
339	0.273645	260.239		339	0.303195	261.449
338	0.318089	260.239		338	0.382692	261.458
337	0.33784	260.25		337	0.38925	261.475
336	0.395933	260.286		336	0.392954	261.52
335	0.367956	260.337		335	0.339347	261.58
334	0.362421	260.402		334	0.29414	261.652
333	0.316533	260.48		333	0.281638	261.729
332	0.290789	260.549		332	0.260055	261.805
331	0.260418	260.614		331	0.282071	261.877
330	0.219459	260.685		330	0.287407	261.953
329	0.264742	260.758		329	0.345329	262.029
328	0.287703	260.823		328	0.321721	262.103
327	0.276653	260.876		327	0.357087	262.152
326	0.241316	260.891		326	0.3611	262.178
325	0.192735	260.847		325	0.373638	262.138
324	0.191117	260.789		324	0.30247	262.093
323	0.137418	260.837		323	0.273677	262.151
322	0.141938	260.948		322	0.216232	262.271
321	0.0941681	261.106		321	0.231385	262.437
320	0.156304	261.198		320	0.168862	262.532
319	0.0954954	261.253		319	0.138419	262.591
318	0.150771	261.308		318	0.159925	262.654
317	0.115264	261.339		317	0.196115	262.695
316	0.169752	261.356		316	0.133379	262.719
315	0.165758	261.328		315	0.0993388	262.688
314	0.133836	261.303		314	0.070078	262.671
313	0.0883672	261.354		313	0.125646	262.734
312	0.0318891	261.472		312	0.124667	262.867
311	0.0693031	261.647		311	0.127437	263.057
310	0.0797747	261.782		310	0.112988	263.192
309	0.0973661	261.89		309	0.127401	263.302
308	0.119268	261.985		308	0.0745425	263.407
307	0.06381	262.103		307	0.0415789	263.525
306	0.0433123	262.233		306	-0.00498123	263.66
305	0.0446747	262.372		305	-0.0323486	263.803
304	0.0540194	262.511		304	0.0190188	263.953
303	0.0684456	262.649		303	0.00448202	264.097
302	0.0766129	262.796		302	0.0345301	264.254
301	0.0293722	262.943		301	0.0442614	264.404
300	0.0510366	263.087		300	0.000176748	264.554
299	-0.00351105	263.221		299	0.0364583	264.705
298	0.00889155	263.359		298	0.0379868	264.853
297	0.0117602	263.506		297	0.0416491	265.013
296	0.0481857	263.647		296	0.0410823	265.158
295	0.0131831	263.78		295	0.013176	265.295
294	-0.00637563	263.887		294	0.0168724	265.406
293	-0.0187747	263.888		293	0.0133474	265.403
292	-0.0220823	263.865		292	-0.0410352	265.382
291	0.0187375	264.037		291	-0.0541122	265.561
290	-0.0155019	264.297		290	-0.0706446	265.83
289	-0.0715225	264.698		289	-0.0793327	266.243
288	-0.0589678	264.951		288	-0.109265	266.496
287	-0.0679115	265.155		287	-0.058768	266.709
286	-0.0323138	265.361		286	-0.0315407	266.917
285	0.0388346	265.572		285	-0.021226	267.126
284	0.051623	265.77		284	-0.0104513	267.328
283	0.0594142	265.968		283	0.00956523	267.528
282	0.0167814	266.146		282	0.0229696	267.715
281	-0.0147156	266.325		281	0.0511706	267.904
280	-0.032	266.521		280	0.0193886	268.106
279	0.0795052	266.734		279	0.0320615	268.317
278	0.101144	266.959		278	0.027553	268.547
277	0.12592	267.179		277	0.0629885	268.769
276	0.0866524	267.393		276	0.151613	268.991
275	0.0945516	267.598		275	0.184458	269.205
274	0.0817556	267.799		274	0.182592	269.411
273	0.0818138	268.002		273	0.116389	269.613
272	0.0888435	268.205		272	0.0663589	269.822
271	0.0635101	268.419		271	0.045811	270.042
270	0.0823875	268.682		270	0.0722071	270.306
269	0.100106	268.997		269	0.0516495	270.633
268	0.144926	269.425		268	0.0549428	271.067
267	0.0920876	269.898		267	0.03986	271.551
266	0.108876	270.415		266	0.0630781	272.074
265	0.0975438	270.962		265	0.186043	272.632
264	0.136036	271.539		264	0.169934	273.223
263	0.176801	272.15		263	0.127526	273.845
262	0.144413	272.771		262	0.101326	274.48
261	0.161553	273.413		261	0.109782	275.133
260	0.155622	274.088		260	0.153843	275.824
259	0.153322	274.78		259	0.11555	276.52
258	0.0917941	275.468		258	0.120089	277.22
257	0.0436531	276.118		257	0.128679	277.882
256	0.0533808	276.744		256	0.161778	278.517
255	0.0239583	277.348		255	0.138796	279.133
254	-0.00272598	277.933		254	0.129095	279.723
253	-0.0161257	278.514		253	0.0797145	280.312
252	-0.014974	279.107		252	0.032667	280.907
251	0.00285238	279.729		251	0.0124608	281.532
250	0.00425517	280.356		250	-0.0101947	282.169
249	0.0341008	280.949		249	-0.047155	282.776
248	0.00735194	281.562		248	-0.0125455	283.404
247	-0.023527	282.217		247	-0.090963	284.066
246	-0.0931407	282.922		246	-0.150344	284.775
245	-0.296685	283.676		245	-0.315415	285.538
244	-0.47589	284.44		244	-0.482841	286.319
243	-0.692428	285.279		243	-0.778795	287.168
242	-0.972327	286.208		242	-1.02615	288.108
241	-1.23332	287.233		241	-1.37697	289.14
240	-1.65535	288.356		240	-1.73989	290.275
239	-2.22418	289.572		239	-2.30758	291.512
238	-2.92071	290.882		238	-2.96771	292.831
237	-3.7846	292.272		237	-3.82869	294.238
236	-4.88487	293.734		236	-4.89018	295.714
235	-6.10237	295.275		235	-6.21164	297.284
234	-7.53908	296.9		234	-7.6711	298.941
233	-9.0972	298.592		233	-9.34405	300.672
232	-10.8696	300.368		232	-11.28	302.487
231	-12.7247	302.113		231	-13.275	304.269
230	-14.6127	304.029		230	-15.2438	306.229
229	-16.3854	306.094		229	-17.1396	308.333
228	-18.1927	308.36		228	-18.935	310.64
227	-19.8598	310.748		227	-20.5027	313.083
226	-21.1965	313.204		226	-21.9784	315.601
225	-22.3055	315.815		225	-23.0324	318.284
224	-22.8764	318.624		224	-23.9009	321.159
223	-23.4355	321.649		223	-24.3671	324.258
222	-23.7628	324.921		222	-24.5019	327.619
221	-23.8928	328.464		221	-24.5899	331.269
220	-23.7675	332.31		220	-24.3973	335.239
219	-23.414	336.493		219	-24.1513	339.564
218	-22.9631	341.071		218	-23.7113	344.299
217	-22.535	346.098		217	-23.3831	349.509
216	-22.1881	351.657		216	-22.9923	355.29
215	-21.8875	357.882		215	-22.6214	361.768
214	-21.8584	364.944		214	-22.5612	369.137
213	-21.928	373.102		213	-22.6432	377.656
212	-22.4298	382.567		212	-22.9183	387.557
211	-22.8943	393.543		211	-23.4757	399.053
210	-23.7291	406.193		210	-23.9754	412.324
209	-24.4703	420.696		209	-24.9788	427.549
208	-24.5929	437.205		208	-25.3074	444.925
207	-23.9469	455.943		207	-24.7037	464.687
206	-22.4305	477.215		206	-23.3751	487.185
205	-20.5252	501.593		205	-21.3624	513.011
204	-17.6658	529.936		204	-19.465	543.079
203	-14.1525	563.48		203	-16.3604	578.681
202	-9.64581	603.672		202	-13.3982	621.327
201	-6.71978	652.487		201	-5.36268	673.177
200	-3.81275	711.776		200	1.40606	735.729
199	0.113582	782.732		199	10.7135	809.877
198	5.38846	864.943		198	13.129	892.459
197	15.6588	941.526		197	18.0555	961.316
196	11.537	994.115		196	19.2198	1005.01
195	9.30669	1018.95		195	18.1918	1021.04
194	0.771958	1021.43		194	9.90888	1021.48
193	-4.76716	1021.41		193	-0.157303	1021.45
192	-2.45461	1021.42		192	-7.41002	1021.42
191	-3.73235	1021.42		191	-4.7054	1021.43
190	-2.06931	1021.42		190	0.669477	1021.45
189	-0.572244	1021.43		189	0.990412	1021.45
188	-2.71028	1021.42		188	-1.81936	1021.44
187	-0.730926	1021.43		187	-2.09999	1021.44
186	2.12591	1021.44		186	-4.70834	1021.43
185	6.63315	1021.46		185	-1.67828	1021.44

## Sheet: KER 40bp
KER:40bp				KER:40bp Post Melting
Wavelength [nm]	CD [mdeg]	HT [V]		Wavelength [nm]	CD [mdeg]	HT [V]
350	0.420056	261.547		350	0.534229	262.286
349	0.425568	261.57		349	0.496291	262.305
348	0.454925	261.579		348	0.440165	262.313
347	0.483645	261.564		347	0.428675	262.303
346	0.493447	261.535		346	0.465088	262.278
345	0.516226	261.481		345	0.483642	262.233
344	0.542702	261.442		344	0.450028	262.188
343	0.501316	261.391		343	0.395185	262.133
342	0.515379	261.355		342	0.343088	262.101
341	0.468953	261.321		341	0.359768	262.072
340	0.423769	261.303		340	0.392055	262.056
339	0.38028	261.299		339	0.393282	262.051
338	0.367647	261.309		338	0.427696	262.056
337	0.393288	261.326		337	0.341222	262.071
336	0.449409	261.365		336	0.353248	262.119
335	0.399201	261.427		335	0.310342	262.185
334	0.402445	261.501		334	0.304973	262.263
333	0.385197	261.585		333	0.280847	262.347
332	0.412935	261.662		332	0.307554	262.418
331	0.398893	261.727		331	0.26969	262.488
330	0.352026	261.803		330	0.297452	262.568
329	0.28867	261.876		329	0.287947	262.651
328	0.260711	261.955		328	0.231278	262.733
327	0.28008	262.003		327	0.187051	262.788
326	0.316539	262.029		326	0.152211	262.808
325	0.351082	261.993		325	0.194012	262.769
324	0.283889	261.956		324	0.241135	262.727
323	0.224986	262.015		323	0.220588	262.79
322	0.199932	262.142		322	0.203918	262.916
321	0.207999	262.313		321	0.154348	263.09
320	0.212909	262.414		320	0.108294	263.196
319	0.160869	262.477		319	0.135443	263.265
318	0.142795	262.543		318	0.133374	263.331
317	0.151507	262.595		317	0.158935	263.376
316	0.155318	262.626		316	0.175756	263.406
315	0.143825	262.614		315	0.132003	263.391
314	0.164914	262.61		314	0.126506	263.388
313	0.104674	262.685		313	0.0731158	263.47
312	0.0771484	262.832		312	0.135708	263.624
311	0.0835289	263.044		311	0.173496	263.84
310	0.131348	263.211		310	0.171101	264.014
309	0.194114	263.363		309	0.162701	264.162
308	0.187719	263.515		308	0.137415	264.319
307	0.17767	263.699		307	0.18051	264.508
306	0.174073	263.917		306	0.197662	264.734
305	0.18456	264.168		305	0.219498	264.995
304	0.217539	264.465		304	0.297233	265.301
303	0.3479	264.809		303	0.341432	265.656
302	0.481174	265.222		302	0.499486	266.083
301	0.625247	265.703		301	0.652239	266.577
300	0.776488	266.274		300	0.78306	267.167
299	0.98662	266.953		299	0.966814	267.863
298	1.22397	267.751		298	1.19863	268.694
297	1.53141	268.703		297	1.50556	269.684
296	1.84482	269.799		296	1.89436	270.823
295	2.21267	271.053		295	2.18259	272.122
294	2.6138	272.437		294	2.62087	273.554
293	2.97974	273.856		293	3.03983	275.035
292	3.49347	275.368		292	3.56206	276.606
291	4.04824	277.16		291	4.10893	278.459
290	4.54789	279.083		290	4.69286	280.447
289	5.07946	281.173		289	5.2454	282.611
288	5.49282	283.125		288	5.74109	284.642
287	5.98033	285.071		287	6.23228	286.679
286	6.38388	287.087		286	6.63219	288.786
285	6.78544	289.172		285	7.00596	290.958
284	7.12428	291.29		284	7.4035	293.163
283	7.34135	293.408		283	7.63939	295.37
282	7.54123	295.486		282	7.81126	297.535
281	7.6242	297.523		281	7.83852	299.667
280	7.63307	299.556		280	7.84962	301.791
279	7.56234	301.593		279	7.834	303.921
278	7.53381	303.663		278	7.85441	306.074
277	7.59002	305.728		277	7.85244	308.229
276	7.59646	307.805		276	7.90716	310.386
275	7.59289	309.868		275	7.88214	312.535
274	7.62968	311.932		274	7.90214	314.684
273	7.61106	313.965		273	7.74928	316.808
272	7.47133	315.925		272	7.48041	318.858
271	7.10571	317.788		271	7.11863	320.806
270	6.7753	319.641		270	6.65762	322.745
269	6.1952	321.555		269	6.19681	324.729
268	5.60683	323.637		268	5.65225	326.89
267	4.92559	325.789		267	5.08014	329.127
266	4.22821	328.005		266	4.29388	331.429
265	3.38173	330.27		265	3.492	333.78
264	2.50556	332.568		264	2.62285	336.161
263	1.79296	334.84		263	1.77516	338.513
262	1.02849	336.996		262	1.00341	340.745
261	0.0595436	338.981		261	0.00524851	342.797
260	-1.0829	340.737		260	-1.1069	344.609
259	-2.30276	342.214		259	-2.32845	346.13
258	-3.39789	343.406		258	-3.6765	347.347
257	-4.55053	344.283		257	-4.90788	348.244
256	-5.83326	344.901		256	-6.19306	348.865
255	-7.06035	345.275		255	-7.38906	349.241
254	-8.32392	345.403		254	-8.65156	349.353
253	-9.60099	345.295		253	-10.0742	349.217
252	-10.688	344.932		252	-11.1726	348.813
251	-11.7181	344.302		251	-12.1858	348.129
250	-12.3515	343.401		250	-12.8745	347.153
249	-12.7161	342.211		249	-13.41	345.873
248	-13.001	340.865		248	-13.6775	344.433
247	-13.0582	339.438		247	-13.7722	342.909
246	-13.0622	337.999		246	-13.427	341.367
245	-12.9335	336.565		245	-13.1979	339.831
244	-12.6291	335.127		244	-12.8516	338.285
243	-12.1495	333.766		243	-12.5302	336.824
242	-11.6317	332.535		242	-12.0974	335.488
241	-11.1747	331.465		241	-11.7309	334.316
240	-10.8604	330.584		240	-11.3966	333.353
239	-10.7051	329.924		239	-11.2203	332.616
238	-10.7639	329.497		238	-11.336	332.129
237	-11.101	329.325		237	-11.6025	331.902
236	-11.6251	329.424		236	-12.1572	331.942
235	-12.5447	329.805		235	-13.0154	332.275
234	-13.4396	330.492		234	-14.145	332.93
233	-14.8003	331.468		233	-15.5729	333.891
232	-16.2109	332.773		232	-17.0055	335.197
231	-17.8627	334.296		231	-18.406	336.727
230	-19.4999	336.254		230	-19.9369	338.717
229	-20.9442	338.634		229	-21.3125	341.146
228	-22.3095	341.491		228	-22.769	344.06
227	-23.441	344.748		227	-23.8162	347.394
226	-24.299	348.356		226	-24.6896	351.093
225	-24.7466	352.435		225	-25.205	355.291
224	-24.9312	357.048		224	-25.3928	360.059
223	-24.9722	362.245		223	-25.2844	365.44
222	-24.6538	368.072		222	-25.0556	371.476
221	-24.3738	374.542		221	-24.5274	378.183
220	-24.0209	381.646		220	-24.3242	385.55
219	-23.9168	389.404		219	-24.1494	393.608
218	-24.0134	397.861		218	-24.8214	402.395
217	-24.634	407.083		217	-25.2423	412.002
216	-25.4252	417.189		216	-26.0443	422.542
215	-26.6324	428.348		215	-27.2416	434.177
214	-28.3962	440.805		214	-29.1405	447.199
213	-30.2728	454.913		213	-31.4616	461.938
212	-32.575	470.97		212	-33.8179	478.762
211	-35.2009	489.249		211	-35.6483	497.954
210	-37.2275	509.972		210	-37.965	519.744
209	-39.2913	533.35		209	-39.2611	544.356
208	-38.545	559.563		208	-39.674	571.962
207	-36.9198	588.744		207	-38.0668	602.711
206	-33.6787	621.195		206	-32.8382	636.955
205	-29.2958	657.678		205	-26.2145	675.468
204	-22.647	699.166		204	-16.8161	719.112
203	-14.2197	746.685		203	-9.6166	768.799
202	-2.10291	801.148		202	-1.86431	825.235
201	0.88166	863.219		201	5.3039	888.605
200	7.97591	929.431		200	5.32364	950.474
199	10.5751	981.273		199	13.0778	994.613
198	13.2238	1012.42		198	15.0969	1017.79
197	5.61266	1021.49		197	12.7551	1021.64
196	9.32208	1021.55		196	4.72245	1021.62
195	1.93004	1021.52		195	0.623051	1021.61
194	2.7317	1021.53		194	-0.591052	1021.6
193	2.11026	1021.52		193	-1.10676	1021.6
192	0.285651	1021.52		192	-0.357574	1021.6
191	-1.51885	1021.51		191	-0.869934	1021.59
190	-0.936946	1021.51		190	-2.68315	1021.59
189	0.286319	1021.51		189	-1.82629	1021.59
188	4.65297	1021.53		188	0.239424	1021.6
187	4.60118	1021.53		187	2.57045	1021.6
186	4.14244	1021.53		186	3.55759	1021.61
185	0.337987	1021.52		185	0.554078	1021.6

## Sheet: KER40bp Subs
KER:40 bp				KER apo				40bp 601				Complex - 40 bp			Complex - KERApo										KERsignal	C (g/L)	0.1		KER	KER+DNA
																										M (g/mol)	11933.7
Wavelength [nm]	CD [mdeg]	HT [V]		Wavelength [nm]	CD [mdeg]	HT [V]		Wavelength [nm]	CD [mdeg]	HT [V]		CD [mdeg]	HT [V]		CD [mdeg]	HT [V]										L (cm)	0.1		MRE	MRE
350	0.420056	261.547		350	0.444977	260.552		350	0.451351	262.386		-0.031295	-0.839		-0.024921	0.995										#aa	94		570.991	-40.1575
349	0.425568	261.57		349	0.46217	260.564		349	0.442222	262.403		-0.016654	-0.833		-0.036602	1.006													593.053	-21.3703
348	0.454925	261.579		348	0.481202	260.569		348	0.480829	262.407		-0.025904	-0.828		-0.026277	1.01										KER MRE FACTOR	1283.19		617.475	-33.2398
347	0.483645	261.564		347	0.469757	260.553		347	0.519455	262.393		-0.03581	-0.829		0.013888	1.011													602.789	-45.9511
346	0.493447	261.535		346	0.487665	260.525		346	0.540437	262.364		-0.04699	-0.829		0.005782	1.01													625.768	-60.2972
345	0.516226	261.481		345	0.462486	260.467		345	0.528143	262.31		-0.011917	-0.829		0.05374	1.014													593.459	-15.2918
344	0.542702	261.442		344	0.45101	260.41		344	0.455147	262.265		0.087555	-0.823		0.091692	1.032													578.733	112.35
343	0.501316	261.391		343	0.463144	260.346		343	0.4119	262.212		0.089416	-0.821		0.038172	1.045													594.303	114.738
342	0.515379	261.355		342	0.425928	260.307		342	0.372941	262.184		0.142438	-0.829		0.089451	1.048													546.548	182.775
341	0.468953	261.321		341	0.392439	260.272		341	0.399596	262.157		0.069357	-0.836		0.076514	1.049													503.575	88.9984
340	0.423769	261.303		340	0.322443	260.252		340	0.422306	262.144		0.001463	-0.841		0.101326	1.051													413.756	1.87731
339	0.38028	261.299		339	0.273645	260.239		339	0.474154	262.132		-0.093874	-0.833		0.106635	1.06													351.139	-120.458
338	0.367647	261.309		338	0.318089	260.239		338	0.49413	262.134		-0.126483	-0.825		0.049558	1.07													408.169	-162.302
337	0.393288	261.326		337	0.33784	260.25		337	0.46156	262.152		-0.068272	-0.826		0.055448	1.076													433.514	-87.6061
336	0.449409	261.365		336	0.395933	260.286		336	0.445068	262.197		0.004341	-0.832		0.053476	1.079													508.058	5.57034
335	0.399201	261.427		335	0.367956	260.337		335	0.392112	262.26		0.007089	-0.833		0.031245	1.09													472.158	9.09655
334	0.402445	261.501		334	0.362421	260.402		334	0.397361	262.332		0.005084	-0.831		0.040024	1.099													465.056	6.52375
333	0.385197	261.585		333	0.316533	260.48		333	0.415729	262.412		-0.030532	-0.827		0.068664	1.105													406.173	-39.1784
332	0.412935	261.662		332	0.290789	260.549		332	0.400286	262.482		0.012649	-0.82		0.122146	1.113													373.138	16.2311
331	0.398893	261.727		331	0.260418	260.614		331	0.349187	262.557		0.049706	-0.83		0.138475	1.113													334.166	63.7824
330	0.352026	261.803		330	0.219459	260.685		330	0.37921	262.634		-0.027184	-0.831		0.132567	1.118													281.608	-34.8823
329	0.28867	261.876		329	0.264742	260.758		329	0.385872	262.713		-0.097202	-0.837		0.023928	1.118													339.715	-124.729
328	0.260711	261.955		328	0.287703	260.823		328	0.360452	262.775		-0.099741	-0.82		-0.026992	1.132													369.178	-127.987
327	0.28008	262.003		327	0.276653	260.876		327	0.308036	262.826		-0.027956	-0.823		0.003427	1.127													354.999	-35.8729
326	0.316539	262.029		326	0.241316	260.891		326	0.222841	262.847		0.093698	-0.818		0.075223	1.138													309.655	120.233
325	0.351082	261.993		325	0.192735	260.847		325	0.238572	262.812		0.11251	-0.819		0.158347	1.146													247.316	144.372
324	0.283889	261.956		324	0.191117	260.789		324	0.204228	262.771		0.079661	-0.815		0.092772	1.167													245.24	102.22
323	0.224986	262.015		323	0.137418	260.837		323	0.244006	262.834		-0.01902	-0.819		0.087568	1.178													176.334	-24.4063
322	0.199932	262.142		322	0.141938	260.948		322	0.265365	262.962		-0.065433	-0.82		0.057994	1.194													182.134	-83.9631
321	0.207999	262.313		321	0.0941681	261.106		321	0.224814	263.129		-0.016815	-0.816		0.113831	1.207													120.836	-21.5769
320	0.212909	262.414		320	0.156304	261.198		320	0.219308	263.232		-0.006399	-0.818		0.056605	1.216													200.568	-8.21115
319	0.160869	262.477		319	0.0954954	261.253		319	0.212973	263.303		-0.052104	-0.826		0.0653736	1.224													122.539	-66.8595
318	0.142795	262.543		318	0.150771	261.308		318	0.233942	263.369		-0.091147	-0.826		-0.007976	1.235													193.468	-116.959
317	0.151507	262.595		317	0.115264	261.339		317	0.23622	263.417		-0.084713	-0.822		0.036243	1.256													147.906	-108.703
316	0.155318	262.626		316	0.169752	261.356		316	0.194257	263.442		-0.038939	-0.816		-0.014434	1.27													217.824	-49.9662
315	0.143825	262.614		315	0.165758	261.328		315	0.184584	263.422		-0.040759	-0.808		-0.021933	1.286													212.699	-52.3016
314	0.164914	262.61		314	0.133836	261.303		314	0.136415	263.416		0.028499	-0.806		0.031078	1.307													171.737	36.5697
313	0.104674	262.685		313	0.0883672	261.354		313	0.171907	263.493		-0.067233	-0.808		0.0163068	1.331													113.392	-86.2729
312	0.0771484	262.832		312	0.0318891	261.472		312	0.134676	263.646		-0.0575276	-0.814		0.0452593	1.36													40.9199	-73.819
311	0.0835289	263.044		311	0.0693031	261.647		311	0.166121	263.86		-0.0825921	-0.816		0.0142258	1.397													88.9292	-105.982
310	0.131348	263.211		310	0.0797747	261.782		310	0.181971	264.031		-0.050623	-0.82		0.0515733	1.429													102.366	-64.9591
309	0.194114	263.363		309	0.0973661	261.89		309	0.233763	264.182		-0.039649	-0.819		0.0967479	1.473													124.939	-50.8773
308	0.187719	263.515		308	0.119268	261.985		308	0.229721	264.335		-0.042002	-0.82		0.068451	1.53													153.044	-53.8967
307	0.17767	263.699		307	0.06381	262.103		307	0.259312	264.523		-0.081642	-0.824		0.11386	1.596													81.8805	-104.762
306	0.174073	263.917		306	0.0433123	262.233		306	0.282017	264.747		-0.107944	-0.83		0.130761	1.684													55.578	-138.513
305	0.18456	264.168		305	0.0446747	262.372		305	0.325041	265.004		-0.140481	-0.836		0.139885	1.796													57.3262	-180.264
304	0.217539	264.465		304	0.0540194	262.511		304	0.406915	265.303		-0.189376	-0.838		0.16352	1.954													69.3173	-243.006
303	0.3479	264.809		303	0.0684456	262.649		303	0.485308	265.659		-0.137408	-0.85		0.279454	2.16													87.8289	-176.321
302	0.481174	265.222		302	0.0766129	262.796		302	0.573282	266.087		-0.092108	-0.865		0.404561	2.426													98.3091	-118.192
301	0.625247	265.703		301	0.0293722	262.943		301	0.716457	266.589		-0.09121	-0.886		0.595875	2.76													37.6902	-117.04
300	0.776488	266.274		300	0.0510366	263.087		300	0.880897	267.184		-0.104409	-0.91		0.725451	3.187													65.4898	-133.977
299	0.98662	266.953		299	-0.00351105	263.221		299	1.08927	267.885		-0.10265	-0.932		0.990131	3.732													-4.50535	-131.72
298	1.22397	267.751		298	0.00889155	263.359		298	1.34768	268.717		-0.12371	-0.966		1.21508	4.392													11.4096	-158.744
297	1.53141	268.703		297	0.0117602	263.506		297	1.68219	269.709		-0.15078	-1.006		1.51965	5.197													15.0906	-193.48
296	1.84482	269.799		296	0.0481857	263.647		296	2.06707	270.854		-0.22225	-1.055		1.79663	6.152													61.8315	-285.19
295	2.21267	271.053		295	0.0131831	263.78		295	2.46682	272.177		-0.25415	-1.124		2.19949	7.273													16.9165	-326.123
294	2.6138	272.437		294	-0.00637563	263.887		294	2.8689	273.639		-0.2551	-1.202		2.62018	8.55													-8.18116	-327.342
293	2.97974	273.856		293	-0.0187747	263.888		293	3.33771	275.142		-0.35797	-1.286		2.99851	9.968													-24.0916	-459.344
292	3.49347	275.368		292	-0.0220823	263.865		292	3.81969	276.739		-0.32622	-1.371		3.51555	11.503													-28.3358	-418.603
291	4.04824	277.16		291	0.0187375	264.037		291	4.39375	278.622		-0.34551	-1.462		4.0295	13.123													24.0438	-443.356
290	4.54789	279.083		290	-0.0155019	264.297		290	4.88327	280.643		-0.33538	-1.56		4.56339	14.786													-19.8919	-430.357
289	5.07946	281.173		289	-0.0715225	264.698		289	5.5537	282.831		-0.47424	-1.658		5.15098	16.475													-91.7771	-608.541
288	5.49282	283.125		288	-0.0589678	264.951		288	6.10569	284.88		-0.61287	-1.755		5.55179	18.174													-75.667	-786.43
287	5.98033	285.071		287	-0.0679115	265.155		287	6.6015	286.922		-0.62117	-1.851		6.04824	19.916													-87.1435	-797.081
286	6.38388	287.087		286	-0.0323138	265.361		286	7.06592	289.037		-0.68204	-1.95		6.41619	21.726													-41.4648	-875.189
285	6.78544	289.172		285	0.0388346	265.572		285	7.42623	291.222		-0.64079	-2.05		6.74661	23.6													49.8323	-822.257
284	7.12428	291.29		284	0.051623	265.77		284	7.75278	293.447		-0.6285	-2.157		7.07266	25.52													66.2422	-806.486
283	7.34135	293.408		283	0.0594142	265.968		283	8.05572	295.676		-0.71437	-2.268		7.28194	27.44													76.2399	-916.674
282	7.54123	295.486		282	0.0167814	266.146		282	8.18866	297.877		-0.64743	-2.391		7.52445	29.34													21.5338	-830.777
281	7.6242	297.523		281	-0.0147156	266.325		281	8.28856	300.04		-0.66436	-2.517		7.63892	31.198													-18.8829	-852.502
280	7.63307	299.556		280	-0.032	266.521		280	8.33052	302.199		-0.69745	-2.643		7.66507	33.035													-41.0622	-894.963
279	7.56234	301.593		279	0.0795052	266.734		279	8.39602	304.356		-0.83368	-2.763		7.48283	34.859													102.02	-1069.77
278	7.53381	303.663		278	0.101144	266.959		278	8.53142	306.543		-0.99761	-2.88		7.43267	36.704													129.787	-1280.13
277	7.59002	305.728		277	0.12592	267.179		277	8.53358	308.726		-0.94356	-2.998		7.4641	38.549													161.58	-1210.77
276	7.59646	307.805		276	0.0866524	267.393		276	8.59352	310.919		-0.99706	-3.114		7.50981	40.412													111.192	-1279.42
275	7.59289	309.868		275	0.0945516	267.598		275	8.51999	313.105		-0.9271	-3.237		7.49834	42.27													121.328	-1189.65
274	7.62968	311.932		274	0.0817556	267.799		274	8.50528	315.29		-0.8756	-3.358		7.54792	44.133													104.908	-1123.56
273	7.61106	313.965		273	0.0818138	268.002		273	8.31657	317.445		-0.70551	-3.48		7.52925	45.963													104.983	-905.305
272	7.47133	315.925		272	0.0888435	268.205		272	8.09872	319.536		-0.62739	-3.611		7.38249	47.72													114.003	-805.062
271	7.10571	317.788		271	0.0635101	268.419		271	7.75212	321.517		-0.64641	-3.729		7.0422	49.369													81.4957	-829.468
270	6.7753	319.641		270	0.0823875	268.682		270	7.36083	323.495		-0.58553	-3.854		6.69291	50.959													105.719	-751.348
269	6.1952	321.555		269	0.100106	268.997		269	6.89791	325.518		-0.70271	-3.963		6.09509	52.558													128.455	-901.712
268	5.60683	323.637		268	0.144926	269.425		268	6.25907	327.72		-0.65224	-4.083		5.4619	54.212													185.968	-836.949
267	4.92559	325.789		267	0.0920876	269.898		267	5.56956	329.996		-0.64397	-4.207		4.8335	55.891													118.166	-826.337
266	4.22821	328.005		266	0.108876	270.415		266	4.85762	332.34		-0.62941	-4.335		4.11933	57.59													139.709	-807.654
265	3.38173	330.27		265	0.0975438	270.962		265	4.06602	334.742		-0.68429	-4.472		3.28419	59.308													125.167	-878.076
264	2.50556	332.568		264	0.136036	271.539		264	3.2366	337.169		-0.73104	-4.601		2.36952	61.029													174.56	-938.065
263	1.79296	334.84		263	0.176801	272.15		263	2.24591	339.561		-0.45295	-4.721		1.61616	62.69													226.87	-581.222
262	1.02849	336.996		262	0.144413	272.771		262	1.24749	341.823		-0.219	-4.827		0.884077	64.225													185.31	-281.019
261	0.0595436	338.981		261	0.161553	273.413		261	0.257423	343.916		-0.197879	-4.935		-0.102009	65.568													207.304	-253.917
260	-1.0829	340.737		260	0.155622	274.088		260	-0.754768	345.769		-0.328132	-5.032		-1.23852	66.649													199.693	-421.057
259	-2.30276	342.214		259	0.153322	274.78		259	-2.08461	347.322		-0.21815	-5.108		-2.45608	67.434													196.742	-279.928
258	-3.39789	343.406		258	0.0917941	275.468		258	-3.40991	348.556		0.01202	-5.15		-3.48968	67.938													117.789	15.424
257	-4.55053	344.283		257	0.0436531	276.118		257	-4.86262	349.461		0.31209	-5.178		-4.59418	68.165													56.0153	400.472
256	-5.83326	344.901		256	0.0533808	276.744		256	-6.1739	350.086		0.34064	-5.185		-5.88664	68.157													68.4978	437.107
255	-7.06035	345.275		255	0.0239583	277.348		255	-7.50543	350.456		0.44508	-5.181		-7.08431	67.927													30.7431	571.123
254	-8.32392	345.403		254	-0.00272598	277.933		254	-8.6544	350.566		0.33048	-5.163		-8.32119	67.47													-3.49796	424.069
253	-9.60099	345.295		253	-0.0161257	278.514		253	-9.85945	350.422		0.25846	-5.127		-9.58486	66.781													-20.6924	331.654
252	-10.688	344.932		252	-0.014974	279.107		252	-10.8944	350.005		0.2064	-5.073		-10.673	65.825													-19.2145	264.851
251	-11.7181	344.302		251	0.00285238	279.729		251	-11.9011	349.292		0.183	-4.99		-11.721	64.573													3.66015	234.824
250	-12.3515	343.401		250	0.00425517	280.356		250	-12.9166	348.266		0.5651	-4.865		-12.3558	63.045													5.4602	725.132
249	-12.7161	342.211		249	0.0341008	280.949		249	-13.5001	346.931		0.784	-4.72		-12.7502	61.262													43.7579	1006.02
248	-13.001	340.865		248	0.00735194	281.562		248	-13.7125	345.43		0.7115	-4.565		-13.0084	59.303													9.43395	912.991
247	-13.0582	339.438		247	-0.023527	282.217		247	-13.6574	343.848		0.5992	-4.41		-13.0347	57.221													-30.1897	768.889
246	-13.0622	337.999		246	-0.0931407	282.922		246	-13.4583	342.227		0.3961	-4.228		-12.9691	55.077													-119.517	508.273
245	-12.9335	336.565		245	-0.296685	283.676		245	-13.137	340.607		0.2035	-4.042		-12.6368	52.889													-380.704	261.13
244	-12.6291	335.127		244	-0.47589	284.44		244	-12.5684	338.965		-0.0607	-3.838		-12.1532	50.687													-610.658	-77.8898
243	-12.1495	333.766		243	-0.692428	285.279		243	-11.8246	337.4		-0.3249	-3.634		-11.4571	48.487													-888.518	-416.909
242	-11.6317	332.535		242	-0.972327	286.208		242	-11.1644	335.946		-0.4673	-3.411		-10.6594	46.327													-1247.68	-599.636
241	-11.1747	331.465		241	-1.23332	287.233		241	-10.2547	334.632		-0.92	-3.167		-9.94138	44.232													-1582.59	-1180.54
240	-10.8604	330.584		240	-1.65535	288.356		240	-9.46824	333.509		-1.39216	-2.925		-9.20505	42.228													-2124.13	-1786.41
239	-10.7051	329.924		239	-2.22418	289.572		239	-8.70261	332.586		-2.00249	-2.662		-8.48092	40.352													-2854.05	-2569.58
238	-10.7639	329.497		238	-2.92071	290.882		238	-7.98735	331.89		-2.77655	-2.393		-7.84319	38.615													-3747.83	-3562.85
237	-11.101	329.325		237	-3.7846	292.272		237	-7.33034	331.42		-3.77066	-2.095		-7.3164	37.053													-4856.37	-4838.48
236	-11.6251	329.424		236	-4.88487	293.734		236	-6.61434	331.18		-5.01076	-1.756		-6.74023	35.69													-6268.23	-6429.77
235	-12.5447	329.805		235	-6.10237	295.275		235	-5.88059	331.187		-6.66411	-1.382		-6.44233	34.53													-7830.52	-8551.34
234	-13.4396	330.492		234	-7.53908	296.9		234	-5.16484	331.457		-8.27476	-0.965		-5.90052	33.592													-9674.09	-10618.1
233	-14.8003	331.468		233	-9.0972	298.592		233	-4.43682	331.97		-10.3635	-0.502		-5.7031	32.876													-11673.5	-13298.3
232	-16.2109	332.773		232	-10.8696	300.368		232	-3.68854	332.762		-12.5224	0.011		-5.3413	32.405													-13947.8	-16068.6
231	-17.8627	334.296		231	-12.7247	302.113		231	-2.8268	333.715		-15.0359	0.581		-5.138	32.183													-16328.2	-19294
230	-19.4999	336.254		230	-14.6127	304.029		230	-1.90425	335.053		-17.5956	1.201		-4.8872	32.225													-18750.9	-22578.6
229	-20.9442	338.634		229	-16.3854	306.094		229	-1.1621	336.747		-19.7821	1.887		-4.5588	32.54													-21025.6	-25384.2
228	-22.3095	341.491		228	-18.1927	308.36		228	-0.438997	338.833		-21.8705	2.658		-4.1168	33.131													-23344.7	-28064.1
227	-23.441	344.748		227	-19.8598	310.748		227	0.284217	341.231		-23.7252	3.517		-3.5812	34													-25483.9	-30444
226	-24.299	348.356		226	-21.1965	313.204		226	1.16077	343.879		-25.4598	4.477		-3.1025	35.152													-27199.2	-32669.8
225	-24.7466	352.435		225	-22.3055	315.815		225	1.9824	346.873		-26.729	5.562		-2.4411	36.62													-28622.2	-34298.5
224	-24.9312	357.048		224	-22.8764	318.624		224	2.76875	350.259		-27.7	6.789		-2.0548	38.424													-29354.8	-35544.4
223	-24.9722	362.245		223	-23.4355	321.649		223	3.35499	354.056		-28.3272	8.189		-1.5367	40.596													-30072.3	-36349.2
222	-24.6538	368.072		222	-23.7628	324.921		222	3.9841	358.268		-28.6379	9.804		-0.891	43.151													-30492.2	-36747.9
221	-24.3738	374.542		221	-23.8928	328.464		221	4.45034	362.861		-28.8241	11.681		-0.481	46.078													-30659.1	-36986.9
220	-24.0209	381.646		220	-23.7675	332.31		220	4.63337	367.789		-28.6543	13.857		-0.2534	49.336													-30498.3	-36768.9
219	-23.9168	389.404		219	-23.414	336.493		219	4.39005	372.993		-28.3068	16.411		-0.5028	52.911													-30044.7	-36323.1
218	-24.0134	397.861		218	-22.9631	341.071		218	3.51763	378.453		-27.531	19.408		-1.0503	56.79													-29466.1	-35327.6
217	-24.634	407.083		217	-22.535	346.098		217	2.36487	384.16		-26.9989	22.923		-2.099	60.985													-28916.7	-34644.7
216	-25.4252	417.189		216	-22.1881	351.657		216	0.849143	390.123		-26.2743	27.066		-3.2371	65.532													-28471.6	-33715
215	-26.6324	428.348		215	-21.8875	357.882		215	-0.892119	396.374		-25.7403	31.974		-4.7449	70.466													-28085.9	-33029.7
214	-28.3962	440.805		214	-21.8584	364.944		214	-2.97401	402.956		-25.4222	37.849		-6.5378	75.861													-28048.5	-32621.6
213	-30.2728	454.913		213	-21.928	373.102		213	-5.13794	409.933		-25.1349	44.98		-8.3448	81.811													-28137.8	-32252.9
212	-32.575	470.97		212	-22.4298	382.567		212	-7.34594	417.338		-25.2291	53.632		-10.1452	88.403													-28781.8	-32373.7
211	-35.2009	489.249		211	-22.8943	393.543		211	-9.25491	425.126		-25.946	64.123		-12.3066	95.706													-29377.8	-33293.7
210	-37.2275	509.972		210	-23.7291	406.193		210	-10.9632	433.237		-26.2643	76.735		-13.4984	103.779													-30449	-33702.2
209	-39.2913	533.35		209	-24.4703	420.696		209	-11.7559	441.629		-27.5354	91.721		-14.821	112.654													-31400.1	-35333.2
208	-38.545	559.563		208	-24.5929	437.205		208	-11.7764	450.304		-26.7686	109.259		-13.9521	122.358													-31557.4	-34349.3
207	-36.9198	588.744		207	-23.9469	455.943		207	-10.5491	459.264		-26.3707	129.48		-12.9729	132.801													-30728.5	-33838.7
206	-33.6787	621.195		206	-22.4305	477.215		206	-8.57171	468.542		-25.107	152.653		-11.2482	143.98													-28782.6	-32217.1
205	-29.2958	657.678		205	-20.5252	501.593		205	-6.29352	478.225		-23.0023	179.453		-8.7706	156.085													-26337.8	-29516.4
204	-22.647	699.166		204	-17.6658	529.936		204	-2.8006	488.495		-19.8464	210.671		-4.9812	169.23													-22668.6	-25466.8
203	-14.2197	746.685		203	-14.1525	563.48		203	0.866847	499.667		-15.0865	247.018		-0.0672	183.205													-18160.4	-19358.9
202	-2.10291	801.148		202	-9.64581	603.672		202	6.76032	512.12		-8.86323	289.028		7.5429	197.476													-12377.4	-11373.2
201	0.88166	863.219		201	-6.71978	652.487		201	13.0318	526.334		-12.1501	336.885		7.60144	210.732													-8622.77	-15591
200	7.97591	929.431		200	-3.81275	711.776		200	20.9045	542.953		-12.9286	386.478		11.7887	217.655													-4892.49	-16589.9
199	10.5751	981.273		199	0.113582	782.732		199	28.3346	562.928		-17.7595	418.345		10.4615	198.541													145.748	-22788.9
198	13.2238	1012.42		198	5.38846	864.943		198	36.9068	587.834		-23.683	424.586		7.83534	147.477													6914.43	-30389.8
197	5.61266	1021.49		197	15.6588	941.526		197	44.6729	620.182		-39.0602	401.308		-10.0461	79.964													20093.3	-50121.8
196	9.32208	1021.55		196	11.537	994.115		196	52.9925	663.98		-43.6704	357.57		-2.21492	27.435													14804.2	-56037.6
195	1.93004	1021.52		195	9.30669	1018.95		195	54.857	724.354		-52.927	297.166		-7.37665	2.57													11942.3	-67915.5
194	2.7317	1021.53		194	0.771958	1021.43		194	55.5368	806.405		-52.8051	215.125		1.95974	0.1													990.571	-67759.1
193	2.11026	1021.52		193	-4.76716	1021.41		193	44.8157	899.588		-42.7054	121.932		6.87742	0.11													-6117.18	-54799.3
192	0.285651	1021.52		192	-2.45461	1021.42		192	36.9378	972.044		-36.6521	49.476		2.74026	0.1													-3149.74	-47031.8
191	-1.51885	1021.51		191	-3.73235	1021.42		191	21.5627	1013.64		-23.0816	7.87		2.2135	0.09													-4789.32	-29618.1
190	-0.936946	1021.51		190	-2.06931	1021.42		190	11.0549	1021.53		-11.9918	-0.02		1.13236	0.09													-2655.32	-15387.8
189	0.286319	1021.51		189	-0.572244	1021.43		189	9.9087	1021.54		-9.62238	-0.03		0.858563	0.08													-734.299	-12347.4
188	4.65297	1021.53		188	-2.71028	1021.42		188	3.61566	1021.51		1.03731	0.02		7.36325	0.11													-3477.81	1331.07
187	4.60118	1021.53		187	-0.730926	1021.43		187	4.49851	1021.52		0.10267	0.01		5.33211	0.1													-937.919	131.745
186	4.14244	1021.53		186	2.12591	1021.44		186	4.1474	1021.52		-0.00496	0.01		2.01653	0.09													2727.95	-6.36463
185	0.337987	1021.52		185	6.63315	1021.46		185	-1.44352	1021.5		1.78151	0.02		-6.29516	0.06													8511.61	2286.02

## Sheet: 40bp 601
KER apo
Wavelength [nm]	CD [mdeg]	HT [V]
350	0.451351	262.386
349	0.442222	262.403
348	0.480829	262.407
347	0.519455	262.393
346	0.540437	262.364
345	0.528143	262.31
344	0.455147	262.265
343	0.4119	262.212
342	0.372941	262.184
341	0.399596	262.157
340	0.422306	262.144
339	0.474154	262.132
338	0.49413	262.134
337	0.46156	262.152
336	0.445068	262.197
335	0.392112	262.26
334	0.397361	262.332
333	0.415729	262.412
332	0.400286	262.482
331	0.349187	262.557
330	0.37921	262.634
329	0.385872	262.713
328	0.360452	262.775
327	0.308036	262.826
326	0.222841	262.847
325	0.238572	262.812
324	0.204228	262.771
323	0.244006	262.834
322	0.265365	262.962
321	0.224814	263.129
320	0.219308	263.232
319	0.212973	263.303
318	0.233942	263.369
317	0.23622	263.417
316	0.194257	263.442
315	0.184584	263.422
314	0.136415	263.416
313	0.171907	263.493
312	0.134676	263.646
311	0.166121	263.86
310	0.181971	264.031
309	0.233763	264.182
308	0.229721	264.335
307	0.259312	264.523
306	0.282017	264.747
305	0.325041	265.004
304	0.406915	265.303
303	0.485308	265.659
302	0.573282	266.087
301	0.716457	266.589
300	0.880897	267.184
299	1.08927	267.885
298	1.34768	268.717
297	1.68219	269.709
296	2.06707	270.854
295	2.46682	272.177
294	2.8689	273.639
293	3.33771	275.142
292	3.81969	276.739
291	4.39375	278.622
290	4.88327	280.643
289	5.5537	282.831
288	6.10569	284.88
287	6.6015	286.922
286	7.06592	289.037
285	7.42623	291.222
284	7.75278	293.447
283	8.05572	295.676
282	8.18866	297.877
281	8.28856	300.04
280	8.33052	302.199
279	8.39602	304.356
278	8.53142	306.543
277	8.53358	308.726
276	8.59352	310.919
275	8.51999	313.105
274	8.50528	315.29
273	8.31657	317.445
272	8.09872	319.536
271	7.75212	321.517
270	7.36083	323.495
269	6.89791	325.518
268	6.25907	327.72
267	5.56956	329.996
266	4.85762	332.34
265	4.06602	334.742
264	3.2366	337.169
263	2.24591	339.561
262	1.24749	341.823
261	0.257423	343.916
260	-0.754768	345.769
259	-2.08461	347.322
258	-3.40991	348.556
257	-4.86262	349.461
256	-6.1739	350.086
255	-7.50543	350.456
254	-8.6544	350.566
253	-9.85945	350.422
252	-10.8944	350.005
251	-11.9011	349.292
250	-12.9166	348.266
249	-13.5001	346.931
248	-13.7125	345.43
247	-13.6574	343.848
246	-13.4583	342.227
245	-13.137	340.607
244	-12.5684	338.965
243	-11.8246	337.4
242	-11.1644	335.946
241	-10.2547	334.632
240	-9.46824	333.509
239	-8.70261	332.586
238	-7.98735	331.89
237	-7.33034	331.42
236	-6.61434	331.18
235	-5.88059	331.187
234	-5.16484	331.457
233	-4.43682	331.97
232	-3.68854	332.762
231	-2.8268	333.715
230	-1.90425	335.053
229	-1.1621	336.747
228	-0.438997	338.833
227	0.284217	341.231
226	1.16077	343.879
225	1.9824	346.873
224	2.76875	350.259
223	3.35499	354.056
222	3.9841	358.268
221	4.45034	362.861
220	4.63337	367.789
219	4.39005	372.993
218	3.51763	378.453
217	2.36487	384.16
216	0.849143	390.123
215	-0.892119	396.374
214	-2.97401	402.956
213	-5.13794	409.933
212	-7.34594	417.338
211	-9.25491	425.126
210	-10.9632	433.237
209	-11.7559	441.629
208	-11.7764	450.304
207	-10.5491	459.264
206	-8.57171	468.542
205	-6.29352	478.225
204	-2.8006	488.495
203	0.866847	499.667
202	6.76032	512.12
201	13.0318	526.334
200	20.9045	542.953
199	28.3346	562.928
198	36.9068	587.834
197	44.6729	620.182
196	52.9925	663.98
195	54.857	724.354
194	55.5368	806.405
193	44.8157	899.588
192	36.9378	972.044
191	21.5627	1013.64
190	11.0549	1021.53
189	9.9087	1021.54
188	3.61566	1021.51
187	4.49851	1021.52
186	4.1474	1021.52
185	-1.44352	1021.5

## Sheet: Melting
KER Apo				KER:40bp
Temperature [C]	CD [mdeg]	HT [V]		Temperature [C]	CD [mdeg]	HT [V]
19.96	-24.4186	324.833		19.99	-24.3123	367.608
21.04	-23.6908	324.889		21.02	-24.2373	367.644
22.02	-23.6446	325.049		22.05	-25.2437	367.885
23.01	-22.9995	325.271		23.04	-25.1782	368.221
24.01	-22.6022	325.455		24.02	-24.0916	368.5
25.05	-21.817	325.695		25.02	-24.2281	368.797
26.06	-21.5397	325.858		26.01	-23.8621	369.094
27.02	-21.0173	326.008		27.03	-23.9311	369.439
28.03	-20.3356	326.262		28.02	-23.4359	369.737
29.05	-19.9834	326.443		29.06	-22.8934	370.024
30.03	-19.6616	326.66		30.01	-23.3755	370.261
31.04	-19.6118	326.87		31.04	-23.1688	370.528
32.05	-18.586	327.04		32.03	-22.1086	370.762
33.07	-18.2535	327.277		33.04	-22.7968	371.095
34.02	-17.6793	327.549		34.06	-22.2297	371.448
35.04	-17.4226	327.749		35.05	-21.525	371.747
36.04	-17.155	328.063		36.03	-21.1638	372.123
37.04	-16.4043	328.313		37.05	-20.7094	372.515
38.04	-15.7305	328.564		38.05	-21.5288	372.834
39.02	-15.5675	328.799		39.03	-20.1772	373.214
40.04	-14.6745	329.081		40.04	-20.0699	373.529
41.01	-14.339	329.341		41.03	-19.7173	374.025
42.07	-14.1904	329.67		42.03	-19.8767	374.56
43.06	-13.6948	329.95		43.05	-19.1204	374.309
44.04	-13.0457	330.267		44.01	-18.7511	374.66
45.05	-12.6287	330.525		45.06	-18.6357	375.149
46.01	-12.4799	330.914		46.01	-18.1074	375.466
47.06	-12.177	331.277		47.04	-17.6029	375.856
48.04	-11.3536	331.53		48.07	-16.7972	376.262
49.03	-10.9406	331.983		49.02	-16.7884	376.701
50.01	-10.9591	332.339		50.05	-17.0057	377.026
51.05	-10.1767	332.709		51.02	-15.0655	377.428
52.03	-10.5058	333.079		52.05	-15.3109	377.887
53.05	-9.58231	333.443		53.05	-14.5262	378.342
54.01	-9.8277	333.844		54.04	-13.9088	378.865
55.08	-9.14269	334.203		55.04	-13.4261	379.397
56.06	-8.55665	334.562		56.03	-13.0072	379.828
57.04	-8.71247	335.018		57.05	-12.4384	380.335
58.06	-8.05858	335.475		58.03	-12.0176	380.814
59.05	-8.36071	335.893		59.06	-11.1661	381.368
60.03	-7.57088	336.369		59.99	-10.2572	381.88
61.05	-7.76839	336.834		61.02	-9.06907	382.4
62.05	-7.25287	337.249		62.06	-9.14108	382.937
63.02	-7.57774	337.768		63.04	-8.67528	383.579
64.04	-6.81408	338.162		64.04	-8.11828	384.196
65.04	-6.65043	338.687		65.05	-7.32589	384.793
66.07	-6.82329	339.152		66	-7.50142	385.514
67.02	-6.21658	339.676		67.01	-6.99301	386.026
68	-6.45042	340.177		68.07	-5.8985	386.851
69.01	-6.08502	340.756		69.01	-5.1881	387.348
70.04	-6.10738	341.335		70.06	-5.57493	388.081
71.05	-6.16588	341.875		71.03	-4.43567	388.917
72.04	-5.40935	342.53		72.03	-5.18958	389.697
73.08	-5.66013	343.186		73.04	-4.83787	390.435
74.02	-5.56947	343.636		74.07	-4.93433	391.431
75.03	-5.70246	344.191		75.06	-4.41308	392.209
76.03	-5.23987	344.82		76.01	-3.76453	393.266
77.05	-4.91241	345.517		77.09	-4.52659	394.458
78.02	-6.02876	346.088		78.04	-4.27476	395.501
79.06	-5.90348	346.732		79.03	-3.58849	396.793
80.03	-5.2782	347.426		80.03	-3.652	398.503
81.05	-5.62377	348.084		81.02	-3.7827	400.281
82.06	-6.28007	348.8		82.05	-3.35921	402.342
83.04	-5.43897	349.541		83.01	-3.39184	405.566
84.05	-5.39359	350.191		84.02	-3.07495	408.375
85.07	-4.08285	351.007		85.04	-4.01603	411.131
86.04	-5.05073	351.766		86.06	-3.39862	411.618
87.06	-4.54911	352.552		87.04	-3.27076	412.869
88.02	-5.00834	353.518		88.07	-3.11721	413.936
89.01	-5.01398	354.075		89.02	-3.04922	414.939
90.06	-4.1911	355.108		90.07	-4.78075	415.797
91.03	-5.01941	356.02		91.01	-3.75992	416.945
92.01	-4.36099	356.765		92.01	-4.30715	418.171
93.03	-4.39788	357.748		93.07	-3.57959	419.344
94.02	-4.82009	358.698		94.07	-3.7642	421.815
95.03	-4.86745	359.762		95.01	-4.09535	423.181
96.09	-4.86872	360.698		96.07	-3.94169	424.213
97.06	-5.00313	361.628		97.06	-4.26559	425.492
98.03	-4.76232	362.886		98.07	-1.66729	426.078
99.05	-4.97775	363.965		99.02	-5.05785	427.449
100.06	-4.39196	365.096		100.05	-3.42478	428.765

## Sheet: Helicity
	KER	KER
	Apo	In complex	100 % a-helix
m at 222nm (mdeg)	-23.7628	-28.6379
L (cm)	0.1
C (g/L)	0.1
M (g/mol)	11933.7
n (#aa)	94
[q]MRW (degcm2/dmol/res)	-30167.9	-36357	-38000		-3572000
hellicity (%)	79.3891	95.6763
