# Supplementary material for: A novel single alpha-helix DNA-binding domain in CAF-1 promotes gene silencing and DNA damage survival through tetrasome-length DNA selectivity and spacer function
Source: eLife journal article supplement (doi:10.7554/elife.83538), 2023-06-14
Supplement: fig2-data1 [file 190827 CD experiments with KER and 40 bp 601_n2.xlsx]

## Sheet: KER Apo
KER apo				KER apo post Melting
Wavelength [nm]	CD [mdeg]	HT [V]		Wavelength [nm]	CD [mdeg]	HT [V]
350	0.444977	260.552		350	0.521753	261.704
349	0.46217	260.564		349	0.454515	261.725
348	0.481202	260.569		348	0.393051	261.733
347	0.469757	260.553		347	0.412957	261.716
346	0.487665	260.525		346	0.450645	261.684
345	0.462486	260.467		345	0.505477	261.635
344	0.45101	260.41		344	0.519334	261.59
343	0.463144	260.346		343	0.470713	261.537
342	0.425928	260.307		342	0.382585	261.504
341	0.392439	260.272		341	0.264936	261.473
340	0.322443	260.252		340	0.281787	261.455
339	0.273645	260.239		339	0.303195	261.449
338	0.318089	260.239		338	0.382692	261.458
337	0.33784	260.25		337	0.38925	261.475
336	0.395933	260.286		336	0.392954	261.52
335	0.367956	260.337		335	0.339347	261.58
334	0.362421	260.402		334	0.29414	261.652
333	0.316533	260.48		333	0.281638	261.729
332	0.290789	260.549		332	0.260055	261.805
331	0.260418	260.614		331	0.282071	261.877
330	0.219459	260.685		330	0.287407	261.953
329	0.264742	260.758		329	0.345329	262.029
328	0.287703	260.823		328	0.321721	262.103
327	0.276653	260.876		327	0.357087	262.152
326	0.241316	260.891		326	0.3611	262.178
325	0.192735	260.847		325	0.373638	262.138
324	0.191117	260.789		324	0.30247	262.093
323	0.137418	260.837		323	0.273677	262.151
322	0.141938	260.948		322	0.216232	262.271
321	0.0941681	261.106		321	0.231385	262.437
320	0.156304	261.198		320	0.168862	262.532
319	0.0954954	261.253		319	0.138419	262.591
318	0.150771	261.308		318	0.159925	262.654
317	0.115264	261.339		317	0.196115	262.695
316	0.169752	261.356		316	0.133379	262.719
315	0.165758	261.328		315	0.0993388	262.688
314	0.133836	261.303		314	0.070078	262.671
313	0.0883672	261.354		313	0.125646	262.734
312	0.0318891	261.472		312	0.124667	262.867
311	0.0693031	261.647		311	0.127437	263.057
310	0.0797747	261.782		310	0.112988	263.192
309	0.0973661	261.89		309	0.127401	263.302
308	0.119268	261.985		308	0.0745425	263.407
307	0.06381	262.103		307	0.0415789	263.525
306	0.0433123	262.233		306	-0.00498123	263.66
305	0.0446747	262.372		305	-0.0323486	263.803
304	0.0540194	262.511		304	0.0190188	263.953
303	0.0684456	262.649		303	0.00448202	264.097
302	0.0766129	262.796		302	0.0345301	264.254
301	0.0293722	262.943		301	0.0442614	264.404
300	0.0510366	263.087		300	0.000176748	264.554
299	-0.00351105	263.221		299	0.0364583	264.705
298	0.00889155	263.359		298	0.0379868	264.853
297	0.0117602	263.506		297	0.0416491	265.013
296	0.0481857	263.647		296	0.0410823	265.158
295	0.0131831	263.78		295	0.013176	265.295
294	-0.00637563	263.887		294	0.0168724	265.406
293	-0.0187747	263.888		293	0.0133474	265.403
292	-0.0220823	263.865		292	-0.0410352	265.382
291	0.0187375	264.037		291	-0.0541122	265.561
290	-0.0155019	264.297		290	-0.0706446	265.83
289	-0.0715225	264.698		289	-0.0793327	266.243
288	-0.0589678	264.951		288	-0.109265	266.496
287	-0.0679115	265.155		287	-0.058768	266.709
286	-0.0323138	265.361		286	-0.0315407	266.917
285	0.0388346	265.572		285	-0.021226	267.126
284	0.051623	265.77		284	-0.0104513	267.328
283	0.0594142	265.968		283	0.00956523	267.528
282	0.0167814	266.146		282	0.0229696	267.715
281	-0.0147156	266.325		281	0.0511706	267.904
280	-0.032	266.521		280	0.0193886	268.106
279	0.0795052	266.734		279	0.0320615	268.317
278	0.101144	266.959		278	0.027553	268.547
277	0.12592	267.179		277	0.0629885	268.769
276	0.0866524	267.393		276	0.151613	268.991
275	0.0945516	267.598		275	0.184458	269.205
274	0.0817556	267.799		274	0.182592	269.411
273	0.0818138	268.002		273	0.116389	269.613
272	0.0888435	268.205		272	0.0663589	269.822
271	0.0635101	268.419		271	0.045811	270.042
270	0.0823875	268.682		270	0.0722071	270.306
269	0.100106	268.997		269	0.0516495	270.633
268	0.144926	269.425		268	0.0549428	271.067
267	0.0920876	269.898		267	0.03986	271.551
266	0.108876	270.415		266	0.0630781	272.074
265	0.0975438	270.962		265	0.186043	272.632
264	0.136036	271.539		264	0.169934	273.223
263	0.176801	272.15		263	0.127526	273.845
262	0.144413	272.771		262	0.101326	274.48
261	0.161553	273.413		261	0.109782	275.133
260	0.155622	274.088		260	0.153843	275.824
259	0.153322	274.78		259	0.11555	276.52
258	0.0917941	275.468		258	0.120089	277.22
257	0.0436531	276.118		257	0.128679	277.882
256	0.0533808	276.744		256	0.161778	278.517
255	0.0239583	277.348		255	0.138796	279.133
254	-0.00272598	277.933		254	0.129095	279.723
253	-0.0161257	278.514		253	0.0797145	280.312
252	-0.014974	279.107		252	0.032667	280.907
251	0.00285238	279.729		251	0.0124608	281.532
250	0.00425517	280.356		250	-0.0101947	282.169
249	0.0341008	280.949		249	-0.047155	282.776
248	0.00735194	281.562		248	-0.0125455	283.404
247	-0.023527	282.217		247	-0.090963	284.066
246	-0.0931407	282.922		246	-0.150344	284.775
245	-0.296685	283.676		245	-0.315415	285.538
244	-0.47589	284.44		244	-0.482841	286.319
243	-0.692428	285.279		243	-0.778795	287.168
242	-0.972327	286.208		242	-1.02615	288.108
241	-1.23332	287.233		241	-1.37697	289.14
240	-1.65535	288.356		240	-1.73989	290.275
239	-2.22418	289.572		239	-2.30758	291.512
238	-2.92071	290.882		238	-2.96771	292.831
237	-3.7846	292.272		237	-3.82869	294.238
236	-4.88487	293.734		236	-4.89018	295.714
235	-6.10237	295.275		235	-6.21164	297.284
234	-7.53908	296.9		234	-7.6711	298.941
233	-9.0972	298.592		233	-9.34405	300.672
232	-10.8696	300.368		232	-11.28	302.487
231	-12.7247	302.113		231	-13.275	304.269
230	-14.6127	304.029		230	-15.2438	306.229
229	-16.3854	306.094		229	-17.1396	308.333
228	-18.1927	308.36		228	-18.935	310.64
227	-19.8598	310.748		227	-20.5027	313.083
226	-21.1965	313.204		226	-21.9784	315.601
225	-22.3055	315.815		225	-23.0324	318.284
224	-22.8764	318.624		224	-23.9009	321.159
223	-23.4355	321.649		223	-24.3671	324.258
222	-23.7628	324.921		222	-24.5019	327.619
221	-23.8928	328.464		221	-24.5899	331.269
220	-23.7675	332.31		220	-24.3973	335.239
219	-23.414	336.493		219	-24.1513	339.564
218	-22.9631	341.071		218	-23.7113	344.299
217	-22.535	346.098		217	-23.3831	349.509
216	-22.1881	351.657		216	-22.9923	355.29
215	-21.8875	357.882		215	-22.6214	361.768
214	-21.8584	364.944		214	-22.5612	369.137
213	-21.928	373.102		213	-22.6432	377.656
212	-22.4298	382.567		212	-22.9183	387.557
211	-22.8943	393.543		211	-23.4757	399.053
210	-23.7291	406.193		210	-23.9754	412.324
209	-24.4703	420.696		209	-24.9788	427.549
208	-24.5929	437.205		208	-25.3074	444.925
207	-23.9469	455.943		207	-24.7037	464.687
206	-22.4305	477.215		206	-23.3751	487.185
205	-20.5252	501.593		205	-21.3624	513.011
204	-17.6658	529.936		204	-19.465	543.079
203	-14.1525	563.48		203	-16.3604	578.681
202	-9.64581	603.672		202	-13.3982	621.327
201	-6.71978	652.487		201	-5.36268	673.177
200	-3.81275	711.776		200	1.40606	735.729
199	0.113582	782.732		199	10.7135	809.877
198	5.38846	864.943		198	13.129	892.459
197	15.6588	941.526		197	18.0555	961.316
196	11.537	994.115		196	19.2198	1005.01
195	9.30669	1018.95		195	18.1918	1021.04
194	0.771958	1021.43		194	9.90888	1021.48
193	-4.76716	1021.41		193	-0.157303	1021.45
192	-2.45461	1021.42		192	-7.41002	1021.42
191	-3.73235	1021.42		191	-4.7054	1021.43
190	-2.06931	1021.42		190	0.669477	1021.45
189	-0.572244	1021.43		189	0.990412	1021.45
188	-2.71028	1021.42		188	-1.81936	1021.44
187	-0.730926	1021.43		187	-2.09999	1021.44
186	2.12591	1021.44		186	-4.70834	1021.43
185	6.63315	1021.46		185	-1.67828	1021.44

## Sheet: KER 40bp
KER:40bp				KER:40bp Post Melting
Wavelength [nm]	CD [mdeg]	HT [V]		Wavelength [nm]	CD [mdeg]	HT [V]
350	0.420056	261.547		350	0.534229	262.286
349	0.425568	261.57		349	0.496291	262.305
348	0.454925	261.579		348	0.440165	262.313
347	0.483645	261.564		347	0.428675	262.303
346	0.493447	261.535		346	0.465088	262.278
345	0.516226	261.481		345	0.483642	262.233
344	0.542702	261.442		344	0.450028	262.188
343	0.501316	261.391		343	0.395185	262.133
342	0.515379	261.355		342	0.343088	262.101
341	0.468953	261.321		341	0.359768	262.072
340	0.423769	261.303		340	0.392055	262.056
339	0.38028	261.299		339	0.393282	262.051
338	0.367647	261.309		338	0.427696	262.056
337	0.393288	261.326		337	0.341222	262.071
336	0.449409	261.365		336	0.353248	262.119
335	0.399201	261.427		335	0.310342	262.185
334	0.402445	261.501		334	0.304973	262.263
333	0.385197	261.585		333	0.280847	262.347
332	0.412935	261.662		332	0.307554	262.418
331	0.398893	261.727		331	0.26969	262.488
330	0.352026	261.803		330	0.297452	262.568
329	0.28867	261.876		329	0.287947	262.651
328	0.260711	261.955		328	0.231278	262.733
327	0.28008	262.003		327	0.187051	262.788
326	0.316539	262.029		326	0.152211	262.808
325	0.351082	261.993		325	0.194012	262.769
324	0.283889	261.956		324	0.241135	262.727
323	0.224986	262.015		323	0.220588	262.79
322	0.199932	262.142		322	0.203918	262.916
321	0.207999	262.313		321	0.154348	263.09
320	0.212909	262.414		320	0.108294	263.196
319	0.160869	262.477		319	0.135443	263.265
318	0.142795	262.543		318	0.133374	263.331
317	0.151507	262.595		317	0.158935	263.376
316	0.155318	262.626		316	0.175756	263.406
315	0.143825	262.614		315	0.132003	263.391
314	0.164914	262.61		314	0.126506	263.388
313	0.104674	262.685		313	0.0731158	263.47
312	0.0771484	262.832		312	0.135708	263.624
311	0.0835289	263.044		311	0.173496	263.84
310	0.131348	263.211		310	0.171101	264.014
309	0.194114	263.363		309	0.162701	264.162
308	0.187719	263.515		308	0.137415	264.319
307	0.17767	263.699		307	0.18051	264.508
306	0.174073	263.917		306	0.197662	264.734
305	0.18456	264.168		305	0.219498	264.995
304	0.217539	264.465		304	0.297233	265.301
303	0.3479	264.809		303	0.341432	265.656
302	0.481174	265.222		302	0.499486	266.083
301	0.625247	265.703		301	0.652239	266.577
300	0.776488	266.274		300	0.78306	267.167
299	0.98662	266.953		299	0.966814	267.863
298	1.22397	267.751		298	1.19863	268.694
297	1.53141	268.703		297	1.50556	269.684
296	1.84482	269.799		296	1.89436	270.823
295	2.21267	271.053		295	2.18259	272.122
294	2.6138	272.437		294	2.62087	273.554
293	2.97974	273.856		293	3.03983	275.035
292	3.49347	275.368		292	3.56206	276.606
291	4.04824	277.16		291	4.10893	278.459
290	4.54789	279.083		290	4.69286	280.447
289	5.07946	281.173		289	5.2454	282.611
288	5.49282	283.125		288	5.74109	284.642
287	5.98033	285.071		287	6.23228	286.679
286	6.38388	287.087		286	6.63219	288.786
285	6.78544	289.172		285	7.00596	290.958
284	7.12428	291.29		284	7.4035	293.163
283	7.34135	293.408		283	7.63939	295.37
282	7.54123	295.486		282	7.81126	297.535
281	7.6242	297.523		281	7.83852	299.667
280	7.63307	299.556		280	7.84962	301.791
279	7.56234	301.593		279	7.834	303.921
278	7.53381	303.663		278	7.85441	306.074
277	7.59002	305.728		277	7.85244	308.229
276	7.59646	307.805		276	7.90716	310.386
275	7.59289	309.868		275	7.88214	312.535
274	7.62968	311.932		274	7.90214	314.684
273	7.61106	313.965		273	7.74928	316.808
272	7.47133	315.925		272	7.48041	318.858
271	7.10571	317.788		271	7.11863	320.806
270	6.7753	319.641		270	6.65762	322.745
269	6.1952	321.555		269	6.19681	324.729
268	5.60683	323.637		268	5.65225	326.89
267	4.92559	325.789		267	5.08014	329.127
266	4.22821	328.005		266	4.29388	331.429
265	3.38173	330.27		265	3.492	333.78
264	2.50556	332.568		264	2.62285	336.161
263	1.79296	334.84		263	1.77516	338.513
262	1.02849	336.996		262	1.00341	340.745
261	0.0595436	338.981		261	0.00524851	342.797
260	-1.0829	340.737		260	-1.1069	344.609
259	-2.30276	342.214		259	-2.32845	346.13
258	-3.39789	343.406		258	-3.6765	347.347
257	-4.55053	344.283		257	-4.90788	348.244
256	-5.83326	344.901		256	-6.19306	348.865
255	-7.06035	345.275		255	-7.38906	349.241
254	-8.32392	345.403		254	-8.65156	349.353
253	-9.60099	345.295		253	-10.0742	349.217
252	-10.688	344.932		252	-11.1726	348.813
251	-11.7181	344.302		251	-12.1858	348.129
250	-12.3515	343.401		250	-12.8745	347.153
249	-12.7161	342.211		249	-13.41	345.873
248	-13.001	340.865		248	-13.6775	344.433
247	-13.0582	339.438		247	-13.7722	342.909
246	-13.0622	337.999		246	-13.427	341.367
245	-12.9335	336.565		245	-13.1979	339.831
244	-12.6291	335.127		244	-12.8516	338.285
243	-12.1495	333.766		243	-12.5302	336.824
242	-11.6317	332.535		242	-12.0974	335.488
241	-11.1747	331.465		241	-11.7309	334.316
240	-10.8604	330.584		240	-11.3966	333.353
239	-10.7051	329.924		239	-11.2203	332.616
238	-10.7639	329.497		238	-11.336	332.129
237	-11.101	329.325		237	-11.6025	331.902
236	-11.6251	329.424		236	-12.1572	331.942
235	-12.5447	329.805		235	-13.0154	332.275
234	-13.4396	330.492		234	-14.145	332.93
233	-14.8003	331.468		233	-15.5729	333.891
232	-16.2109	332.773		232	-17.0055	335.197
231	-17.8627	334.296		231	-18.406	336.727
230	-19.4999	336.254		230	-19.9369	338.717
229	-20.9442	338.634		229	-21.3125	341.146
228	-22.3095	341.491		228	-22.769	344.06
227	-23.441	344.748		227	-23.8162	347.394
226	-24.299	348.356		226	-24.6896	351.093
225	-24.7466	352.435		225	-25.205	355.291
224	-24.9312	357.048		224	-25.3928	360.059
223	-24.9722	362.245		223	-25.2844	365.44
222	-24.6538	368.072		222	-25.0556	371.476
221	-24.3738	374.542		221	-24.5274	378.183
220	-24.0209	381.646		220	-24.3242	385.55
219	-23.9168	389.404		219	-24.1494	393.608
218	-24.0134	397.861		218	-24.8214	402.395
217	-24.634	407.083		217	-25.2423	412.002
216	-25.4252	417.189		216	-26.0443	422.542
215	-26.6324	428.348		215	-27.2416	434.177
214	-28.3962	440.805		214	-29.1405	447.199
213	-30.2728	454.913		213	-31.4616	461.938
212	-32.575	470.97		212	-33.8179	478.762
211	-35.2009	489.249		211	-35.6483	497.954
210	-37.2275	509.972		210	-37.965	519.744
209	-39.2913	533.35		209	-39.2611	544.356
208	-38.545	559.563		208	-39.674	571.962
207	-36.9198	588.744		207	-38.0668	602.711
206	-33.6787	621.195		206	-32.8382	636.955
205	-29.2958	657.678		205	-26.2145	675.468
204	-22.647	699.166		204	-16.8161	719.112
203	-14.2197	746.685		203	-9.6166	768.799
202	-2.10291	801.148		202	-1.86431	825.235
201	0.88166	863.219		201	5.3039	888.605
200	7.97591	929.431		200	5.32364	950.474
199	10.5751	981.273		199	13.0778	994.613
198	13.2238	1012.42		198	15.0969	1017.79
197	5.61266	1021.49		197	12.7551	1021.64
196	9.32208	1021.55		196	4.72245	1021.62
195	1.93004	1021.52		195	0.623051	1021.61
194	2.7317	1021.53		194	-0.591052	1021.6
193	2.11026	1021.52		193	-1.10676	1021.6
192	0.285651	1021.52		192	-0.357574	1021.6
191	-1.51885	1021.51		191	-0.869934	1021.59
190	-0.936946	1021.51		190	-2.68315	1021.59
189	0.286319	1021.51		189	-1.82629	1021.59
188	4.65297	1021.53		188	0.239424	1021.6
187	4.60118	1021.53		187	2.57045	1021.6
186	4.14244	1021.53		186	3.55759	1021.61
185	0.337987	1021.52		185	0.554078	1021.6

## Sheet: KER40bp Subs
KER:40 bp				KER apo				40bp 601				Complex - 40 bp			Complex - KERApo										KERsignal	C (g/L)	0.1		KER	KER+DNA
																										M (g/mol)	11933.7
Wavelength [nm]	CD [mdeg]	HT [V]		Wavelength [nm]	CD [mdeg]	HT [V]		Wavelength [nm]	CD [mdeg]	HT [V]		CD [mdeg]	HT [V]		CD [mdeg]	HT [V]										L (cm)	0.1		MRE	MRE
350	0.451808	262.495		350	0.644107	260.743		350	0.451351	262.386		0.000457	0.109		-0.192299	1.752										#aa	94		826.513	0.586419
349	0.442192	262.513		349	0.555045	260.764		349	0.442222	262.403		-3e-05	0.11		-0.112853	1.749													712.23	-0.0384958
348	0.443824	262.521		348	0.446234	260.77		348	0.480829	262.407		-0.037005	0.114		-0.00241	1.751										KER MRE FACTOR	1283.19		572.604	-47.4845
347	0.478091	262.51		347	0.399741	260.762		347	0.519455	262.393		-0.041364	0.117		0.07835	1.748													512.945	-53.078
346	0.521281	262.485		346	0.358627	260.732		346	0.540437	262.364		-0.019156	0.121		0.162654	1.753													460.187	-24.5808
345	0.55128	262.434		345	0.354665	260.676		345	0.528143	262.31		0.023137	0.124		0.196615	1.758													455.103	29.6892
344	0.513054	262.385		344	0.422169	260.62		344	0.455147	262.265		0.057907	0.12		0.090885	1.765													541.724	74.3058
343	0.468225	262.324		343	0.445579	260.555		343	0.4119	262.212		0.056325	0.112		0.022646	1.769													571.764	72.2758
342	0.438677	262.293		342	0.419352	260.519		342	0.372941	262.184		0.065736	0.109		0.019325	1.774													538.109	84.3519
341	0.386042	262.264		341	0.412399	260.482		341	0.399596	262.157		-0.013554	0.107		-0.026357	1.782													529.187	-17.3924
340	0.396563	262.247		340	0.391446	260.461		340	0.422306	262.144		-0.025743	0.103		0.005117	1.786													502.301	-33.0332
339	0.401294	262.234		339	0.373935	260.445		339	0.474154	262.132		-0.07286	0.102		0.027359	1.789													479.831	-93.4934
338	0.419928	262.239		338	0.371787	260.442		338	0.49413	262.134		-0.074202	0.105		0.048141	1.797													477.074	-95.2154
337	0.410756	262.258		337	0.290292	260.456		337	0.46156	262.152		-0.050804	0.106		0.120464	1.802													372.501	-65.1913
336	0.409379	262.301		336	0.272957	260.492		336	0.445068	262.197		-0.035689	0.104		0.136422	1.809													350.256	-45.7959
335	0.36326	262.361		335	0.275974	260.548		335	0.392112	262.26		-0.028852	0.101		0.087286	1.813													354.128	-37.0227
334	0.367816	262.437		334	0.286616	260.613		334	0.397361	262.332		-0.029545	0.105		0.0812	1.824													367.783	-37.9119
333	0.385265	262.522		333	0.30166	260.685		333	0.415729	262.412		-0.030464	0.11		0.083605	1.837													387.088	-39.0912
332	0.408149	262.6		332	0.28248	260.753		332	0.400286	262.482		0.007863	0.118		0.125669	1.847													362.476	10.0897
331	0.410059	262.669		331	0.241263	260.811		331	0.349187	262.557		0.060872	0.112		0.168796	1.858													309.587	78.1105
330	0.395297	262.743		330	0.229582	260.878		330	0.37921	262.634		0.016087	0.109		0.165715	1.865													294.598	20.6427
329	0.351626	262.817		329	0.20909	260.95		329	0.385872	262.713		-0.034246	0.104		0.142536	1.867													268.303	-43.9442
328	0.254057	262.885		328	0.1968	261.014		328	0.360452	262.775		-0.106395	0.11		0.057257	1.871													252.532	-136.525
327	0.198312	262.941		327	0.237541	261.058		327	0.308036	262.826		-0.109724	0.115		-0.039229	1.883													304.811	-140.797
326	0.108302	262.959		326	0.202718	261.07		326	0.222841	262.847		-0.114539	0.112		-0.094416	1.889													260.126	-146.976
325	0.1312	262.923		325	0.198296	261.03		325	0.238572	262.812		-0.107372	0.111		-0.067096	1.893													254.452	-137.779
324	0.0995834	262.877		324	0.128136	260.979		324	0.204228	262.771		-0.104645	0.106		-0.0285526	1.898													164.423	-134.279
323	0.089813	262.938		323	0.14311	261.028		323	0.244006	262.834		-0.154193	0.104		-0.053297	1.91													183.638	-197.859
322	0.110371	263.064		322	0.176469	261.138		322	0.265365	262.962		-0.154994	0.102		-0.066098	1.926													226.444	-198.887
321	0.176669	263.235		321	0.181723	261.291		321	0.224814	263.129		-0.048145	0.106		-0.005054	1.944													233.186	-61.7793
320	0.185154	263.335		320	0.110358	261.385		320	0.219308	263.232		-0.034154	0.103		0.074796	1.95													141.611	-43.8262
319	0.204379	263.403		319	0.0676781	261.439		319	0.212973	263.303		-0.008594	0.1		0.136701	1.964													86.844	-11.0278
318	0.165567	263.469		318	0.076133	261.501		318	0.233942	263.369		-0.068375	0.1		0.089434	1.968													97.6933	-87.7383
317	0.131723	263.514		317	0.0971158	261.541		317	0.23622	263.417		-0.104497	0.097		0.0346072	1.973													124.618	-134.09
316	0.104637	263.546		316	0.108111	261.56		316	0.194257	263.442		-0.08962	0.104		-0.003474	1.986													138.727	-115
315	0.0602084	263.528		315	0.133014	261.533		315	0.184584	263.422		-0.124376	0.106		-0.0728056	1.995													170.683	-159.598
314	0.108514	263.525		314	0.0923574	261.507		314	0.136415	263.416		-0.027901	0.109		0.0161566	2.018													118.512	-35.8024
313	0.0770887	263.599		313	0.0735619	261.552		313	0.171907	263.493		-0.0948183	0.106		0.0035268	2.047													94.3941	-121.67
312	0.104446	263.745		312	0.0532923	261.67		312	0.134676	263.646		-0.03023	0.099		0.0511537	2.075													68.3843	-38.7909
311	0.131162	263.95		311	0.117507	261.849		311	0.166121	263.86		-0.034959	0.09		0.013655	2.101													150.784	-44.8591
310	0.102162	264.119		310	0.0810018	261.985		310	0.181971	264.031		-0.079809	0.088		0.0211602	2.134													103.941	-102.41
309	0.144477	264.264		309	0.0878708	262.093		309	0.233763	264.182		-0.089286	0.082		0.0566062	2.171													112.755	-114.571
308	0.138097	264.415		308	0.0344594	262.189		308	0.229721	264.335		-0.091624	0.08		0.103638	2.226													44.218	-117.571
307	0.176483	264.593		307	0.0747279	262.305		307	0.259312	264.523		-0.082829	0.07		0.101755	2.288													95.8903	-106.286
306	0.201123	264.812		306	0.0718592	262.431		306	0.282017	264.747		-0.080894	0.065		0.129264	2.381													92.2092	-103.803
305	0.259756	265.059		305	0.0670909	262.567		305	0.325041	265.004		-0.065285	0.055		0.192665	2.492													86.0905	-83.7732
304	0.307235	265.351		304	0.0436287	262.699		304	0.406915	265.303		-0.09968	0.048		0.263606	2.652													55.984	-127.909
303	0.340482	265.685		303	0.0162519	262.836		303	0.485308	265.659		-0.144826	0.026		0.32423	2.849													20.8543	-185.84
302	0.386979	266.086		302	0.0290868	262.985		302	0.573282	266.087		-0.186303	-0.001		0.357892	3.101													37.324	-239.063
301	0.517855	266.551		301	0.00828476	263.128		301	0.716457	266.589		-0.198602	-0.038		0.50957	3.423													10.6309	-254.845
300	0.708717	267.102		300	-0.00438843	263.272		300	0.880897	267.184		-0.17218	-0.082		0.713105	3.83													-5.6312	-220.94
299	0.98001	267.754		299	-0.0245272	263.418		299	1.08927	267.885		-0.10926	-0.131		1.00454	4.336													-31.4731	-140.202
298	1.24406	268.519		298	-0.0250771	263.559		298	1.34768	268.717		-0.10362	-0.198		1.26914	4.96													-32.1787	-132.964
297	1.57274	269.436		297	-0.0740306	263.708		297	1.68219	269.709		-0.10945	-0.273		1.64677	5.728													-94.9955	-140.445
296	1.81644	270.489		296	-0.0478717	263.839		296	2.06707	270.854		-0.25063	-0.365		1.86431	6.65													-61.4286	-321.607
295	2.12993	271.696		295	-0.0877838	263.97		295	2.46682	272.177		-0.33689	-0.481		2.21771	7.726													-112.644	-432.295
294	2.43776	273.03		294	-0.0704068	264.072		294	2.8689	273.639		-0.43114	-0.609		2.50817	8.958													-90.3455	-553.236
293	2.88738	274.39		293	-0.0851468	264.082		293	3.33771	275.142		-0.45033	-0.752		2.97253	10.308													-109.26	-577.86
292	3.3929	275.832		292	-0.096654	264.054		292	3.81969	276.739		-0.42679	-0.907		3.48955	11.778													-124.026	-547.654
291	3.87904	277.552		291	-0.0952738	264.222		291	4.39375	278.622		-0.51471	-1.07		3.97431	13.33													-122.255	-660.472
290	4.4046	279.406		290	-0.0893143	264.482		290	4.88327	280.643		-0.47867	-1.237		4.49391	14.924													-114.607	-614.226
289	4.9	281.426		289	-0.010301	264.886		289	5.5537	282.831		-0.6537	-1.405		4.9103	16.54													-13.2182	-838.823
288	5.34902	283.31		288	0.0518211	265.141		288	6.10569	284.88		-0.75667	-1.57		5.2972	18.169													66.4964	-970.953
287	5.77922	285.183		287	0.0974777	265.334		287	6.6015	286.922		-0.82228	-1.739		5.68174	19.849													125.083	-1055.14
286	6.20988	287.123		286	0.127956	265.538		286	7.06592	289.037		-0.85604	-1.914		6.08192	21.585													164.192	-1098.46
285	6.62895	289.13		285	0.0902824	265.744		285	7.42623	291.222		-0.79728	-2.092		6.53867	23.386													115.85	-1023.06
284	6.98245	291.17		284	0.0655162	265.941		284	7.75278	293.447		-0.77033	-2.277		6.91693	25.229													84.0699	-988.482
283	7.15281	293.211		283	0.0130239	266.136		283	8.05572	295.676		-0.90291	-2.465		7.13979	27.075													16.7122	-1158.61
282	7.15677	295.202		282	-0.0182271	266.313		282	8.18866	297.877		-1.03189	-2.675		7.175	28.889													-23.3889	-1324.11
281	7.19697	297.16		281	-0.0323051	266.485		281	8.28856	300.04		-1.09159	-2.88		7.22928	30.675													-41.4537	-1400.72
280	7.20765	299.114		280	0.00557124	266.672		280	8.33052	302.199		-1.12287	-3.085		7.20208	32.442													7.14897	-1440.86
279	7.30774	301.073		279	0.0388479	266.874		279	8.39602	304.356		-1.08828	-3.283		7.26889	34.199													49.8493	-1396.47
278	7.34962	303.06		278	0.0373166	267.094		278	8.53142	306.543		-1.1818	-3.483		7.3123	35.966													47.8844	-1516.48
277	7.4187	305.042		277	0.0270808	267.315		277	8.53358	308.726		-1.11488	-3.684		7.39162	37.727													34.7499	-1430.61
276	7.51144	307.038		276	0.0262464	267.528		276	8.59352	310.919		-1.08208	-3.881		7.48519	39.51													33.6792	-1388.52
275	7.5067	309.022		275	0.0128431	267.735		275	8.51999	313.105		-1.01329	-4.083		7.49386	41.287													16.4802	-1300.25
274	7.48626	310.999		274	-0.020757	267.935		274	8.50528	315.29		-1.01902	-4.291		7.50702	43.064													-26.6352	-1307.6
273	7.35341	312.947		273	-0.0220464	268.13		273	8.31657	317.445		-0.96316	-4.498		7.37546	44.817													-28.2898	-1235.92
272	7.04058	314.825		272	0.0213051	268.325		272	8.09872	319.536		-1.05814	-4.711		7.01927	46.5													27.3385	-1357.8
271	6.64942	316.613		271	0.101206	268.532		271	7.75212	321.517		-1.1027	-4.904		6.54821	48.081													129.867	-1414.98
270	6.17323	318.401		270	0.127002	268.786		270	7.36083	323.495		-1.1876	-5.094		6.04623	49.615													162.968	-1523.92
269	5.73681	320.238		269	0.139876	269.094		269	6.89791	325.518		-1.1611	-5.28		5.59693	51.144													179.488	-1489.91
268	5.28162	322.244		268	0.118347	269.506		268	6.25907	327.72		-0.97745	-5.476		5.16327	52.738													151.862	-1254.26
267	4.73608	324.321		267	0.139123	269.97		267	5.56956	329.996		-0.83348	-5.675		4.59696	54.351													178.522	-1069.52
266	4.0295	326.464		266	0.130757	270.481		266	4.85762	332.34		-0.82812	-5.876		3.89874	55.983													167.786	-1062.64
265	3.33949	328.655		265	0.157423	271.03		265	4.06602	334.742		-0.72653	-6.087		3.18207	57.625													202.004	-932.278
264	2.572	330.875		264	0.204689	271.608		264	3.2366	337.169		-0.6646	-6.294		2.36731	59.267													262.655	-852.81
263	1.82129	333.065		263	0.205397	272.214		263	2.24591	339.561		-0.42462	-6.496		1.61589	60.851													263.564	-544.869
262	1.02862	335.147		262	0.243567	272.827		262	1.24749	341.823		-0.21887	-6.676		0.785053	62.32													312.543	-280.852
261	0.102082	337.061		261	0.194405	273.465		261	0.257423	343.916		-0.155341	-6.855		-0.092323	63.596													249.459	-199.332
260	-1.02593	338.77		260	0.132314	274.135		260	-0.754768	345.769		-0.271162	-6.999		-1.15824	64.635													169.784	-347.953
259	-2.07938	340.225		259	0.0801206	274.818		259	-2.08461	347.322		0.00523	-7.097		-2.1595	65.407													102.81	6.7111
258	-3.198	341.391		258	0.0600553	275.504		258	-3.40991	348.556		0.21191	-7.165		-3.25806	65.887													77.0625	271.921
257	-4.3531	342.263		257	0.0624807	276.154		257	-4.86262	349.461		0.50952	-7.198		-4.41558	66.109													80.1748	653.812
256	-5.63242	342.876		256	0.113115	276.772		256	-6.1739	350.086		0.54148	-7.21		-5.74553	66.104													145.148	694.823
255	-6.91042	343.259		255	0.154218	277.37		255	-7.50543	350.456		0.59501	-7.197		-7.06464	65.889													197.891	763.512
254	-8.06917	343.415		254	0.0582476	277.946		254	-8.6544	350.566		0.58523	-7.151		-8.12742	65.469													74.7429	750.963
253	-9.21316	343.342		253	-0.0588966	278.519		253	-9.85945	350.422		0.64629	-7.08		-9.15426	64.823													-75.5757	829.314
252	-10.256	343.031		252	-0.0725924	279.108		252	-10.8944	350.005		0.6384	-6.974		-10.1834	63.923													-93.15	819.19
251	-11.2798	342.462		251	-0.035745	279.72		251	-11.9011	349.292		0.6213	-6.83		-11.2441	62.742													-45.8677	797.247
250	-12.01	341.633		250	0.0102325	280.339		250	-12.9166	348.266		0.9066	-6.633		-12.0202	61.294													13.1303	1163.34
249	-12.574	340.527		249	-0.0335116	280.932		249	-13.5001	346.931		0.9261	-6.404		-12.5405	59.595													-43.0018	1188.36
248	-12.7517	339.265		248	-0.0407359	281.538		248	-13.7125	345.43		0.9608	-6.165		-12.711	57.727													-52.272	1232.89
247	-12.765	337.926		247	-0.0869242	282.19		247	-13.6574	343.848		0.8924	-5.922		-12.6781	55.736													-111.54	1145.12
246	-12.5683	336.569		246	-0.161102	282.873		246	-13.4583	342.227		0.89	-5.658		-12.4072	53.696													-206.725	1142.04
245	-12.2956	335.223		245	-0.339908	283.612		245	-13.137	340.607		0.8414	-5.384		-11.9557	51.611													-436.167	1079.68
244	-11.9122	333.87		244	-0.477239	284.366		244	-12.5684	338.965		0.6562	-5.095		-11.435	49.504													-612.389	842.031
243	-11.579	332.594		243	-0.690122	285.184		243	-11.8246	337.4		0.2456	-4.806		-10.8889	47.41													-885.559	315.152
242	-11.1877	331.436		242	-0.992442	286.081		242	-11.1644	335.946		-0.0233	-4.51		-10.1953	45.355													-1273.49	-29.8984
241	-11.0115	330.43		241	-1.39063	287.07		241	-10.2547	334.632		-0.7568	-4.202		-9.62087	43.36													-1784.45	-971.12
240	-10.9094	329.61		240	-1.84929	288.154		240	-9.46824	333.509		-1.44116	-3.899		-9.06011	41.456													-2373	-1849.29
239	-11.0414	328.999		239	-2.44938	289.332		239	-8.70261	332.586		-2.33879	-3.587		-8.59202	39.667													-3143.03	-3001.12
238	-11.2721	328.611		238	-3.16566	290.589		238	-7.98735	331.89		-3.28475	-3.279		-8.10644	38.022													-4062.15	-4214.97
237	-11.7417	328.46		237	-4.08532	291.913		237	-7.33034	331.42		-4.41136	-2.96		-7.65638	36.547													-5242.25	-5660.62
236	-12.3161	328.545		236	-5.2656	293.302		236	-6.61434	331.18		-5.70176	-2.635		-7.0505	35.243													-6756.78	-7316.46
235	-13.2855	328.89		235	-6.63479	294.761		235	-5.88059	331.187		-7.40491	-2.297		-6.65071	34.129													-8513.71	-9501.92
234	-14.4511	329.502		234	-8.20291	296.275		234	-5.16484	331.457		-9.28626	-1.955		-6.24819	33.227													-10525.9	-11916.1
233	-15.8994	330.372		233	-9.9298	297.828		233	-4.43682	331.97		-11.4626	-1.598		-5.9696	32.544													-12741.8	-14708.7
232	-17.6116	331.53		232	-11.8389	299.428		232	-3.68854	332.762		-13.9231	-1.232		-5.7727	32.102													-15191.6	-17866
231	-19.5336	332.856		231	-13.8539	300.967		231	-2.8268	333.715		-16.7068	-0.859		-5.6797	31.889													-17777.2	-21438
230	-21.4152	334.58		230	-15.923	302.638		230	-1.90425	335.053		-19.5109	-0.473		-5.4922	31.942													-20432.3	-25036.3
229	-23.284	336.647		229	-18.0113	304.405		229	-1.1621	336.747		-22.1219	-0.1		-5.2727	32.242													-23112	-28386.7
228	-24.9494	339.098		228	-19.9371	306.301		228	-0.438997	338.833		-24.5104	0.265		-5.0123	32.797													-25583.1	-31451.6
227	-26.3111	341.859		227	-21.734	308.257		227	0.284217	341.231		-26.5953	0.628		-4.5771	33.602													-27888.9	-34126.9
226	-27.2869	344.859		226	-23.183	310.181		226	1.16077	343.879		-28.4477	0.98		-4.1039	34.678													-29748.3	-36503.8
225	-27.9558	348.199		225	-24.293	312.164		225	1.9824	346.873		-29.9382	1.326		-3.6628	36.035													-31172.6	-38416.5
224	-28.2406	351.911		224	-25.0747	314.19		224	2.76875	350.259		-31.0094	1.652		-3.1659	37.721													-32175.7	-39791
223	-28.3258	356.012		223	-25.6444	316.297		223	3.35499	354.056		-31.6808	1.956		-2.6814	39.715													-32906.7	-40652.6
222	-28.2539	360.496		222	-25.9481	318.472		222	3.9841	358.268		-32.238	2.228		-2.3058	42.024													-33296.4	-41367.6
221	-27.9467	365.355		221	-25.9581	320.712		221	4.45034	362.861		-32.397	2.494		-1.9886	44.643													-33309.2	-41571.6
220	-27.6945	370.536		220	-25.7672	323.018		220	4.63337	367.789		-32.3279	2.747		-1.9273	47.518													-33064.3	-41482.9
219	-27.4679	375.992		219	-25.4241	325.366		219	4.39005	372.993		-31.8579	2.999		-2.0438	50.626													-32624	-40879.9
218	-27.7673	381.705		218	-25.0234	327.774		218	3.51763	378.453		-31.2849	3.252		-2.7439	53.931													-32109.8	-40144.6
217	-28.0497	387.697		217	-24.7387	330.239		217	2.36487	384.16		-30.4146	3.537		-3.311	57.458													-31744.5	-39027.7
216	-28.8874	393.99		216	-24.1823	332.78		216	0.849143	390.123		-29.7365	3.867		-4.7051	61.21													-31030.5	-38157.7
215	-29.8992	400.634		215	-23.902	335.438		215	-0.892119	396.374		-29.0071	4.26		-5.9972	65.196													-30670.9	-37221.7
214	-31.5826	407.711		214	-23.687	338.267		214	-2.97401	402.956		-28.6086	4.755		-7.8956	69.444													-30395	-36710.3
213	-33.4612	415.338		213	-23.7598	341.363		213	-5.13794	409.933		-28.3233	5.405		-9.7014	73.975													-30488.4	-36344.2
212	-35.5757	423.61		212	-24.2031	344.79		212	-7.34594	417.338		-28.2298	6.272		-11.3726	78.82													-31057.2	-36224.2
211	-37.4239	432.552		211	-24.8912	348.585		211	-9.25491	425.126		-28.169	7.426		-12.5327	83.967													-31940.2	-36146.2
210	-39.3939	442.177		210	-25.74	352.747		210	-10.9632	433.237		-28.4307	8.94		-13.6539	89.43													-33029.4	-36482.1
209	-40.8012	452.427		209	-26.2802	357.268		209	-11.7559	441.629		-29.0453	10.798		-14.521	95.159													-33722.6	-37270.7
208	-40.2881	463.222		208	-26.4669	362.131		208	-11.7764	450.304		-28.5117	12.918		-13.8212	101.091													-33962.1	-36586
207	-38.1774	474.497		207	-25.8405	367.311		207	-10.5491	459.264		-27.6283	15.233		-12.3369	107.186													-33158.3	-35452.4
206	-34.501	486.24		206	-24.4722	372.796		206	-8.57171	468.542		-25.9293	17.698		-10.0288	113.444													-31402.5	-33272.3
205	-28.7918	498.609		205	-22.2383	378.672		205	-6.29352	478.225		-22.4983	20.384		-6.5535	119.937													-28536	-28869.6
204	-21.7824	511.905		204	-19.232	385.119		204	-2.8006	488.495		-18.9818	23.41		-2.5504	126.786													-24678.4	-24357.3
203	-12.3963	526.542		203	-15.6656	392.444		203	0.866847	499.667		-13.2631	26.875		3.2693	134.098													-20102	-17019.2
202	-1.11303	543.031		202	-11.3612	400.999		202	6.76032	512.12		-7.87335	30.911		10.2482	142.032													-14578.6	-10103
201	11.218	561.936		201	-5.94544	411.25		201	13.0318	526.334		-1.8138	35.602		17.1634	150.686													-7629.14	-2327.45
200	25.2697	583.951		200	0.381664	423.757		200	20.9045	542.953		4.3652	40.998		24.888	160.194													489.748	5601.39
199	40.3441	610.055		199	7.67312	439.311		199	28.3346	562.928		12.0095	47.127		32.671	170.744													9846.09	15410.5
198	57.7082	641.967		198	15.4278	459.207		198	36.9068	587.834		20.8014	54.133		42.2804	182.76													19796.8	26692.2
197	74.8761	682.036		197	23.2243	485.384		197	44.6729	620.182		30.2032	61.854		51.6518	196.652													29801.2	38756.5
196	93.0404	733.289		196	30.9797	520.926		196	52.9925	663.98		40.0479	69.309		62.0607	212.363													39752.9	51389.2
195	98.275	799.719		195	37.2935	570.629		195	54.857	724.354		43.418	75.365		60.9815	229.09													47854.7	55713.7
194	96.0543	881.963		194	40.6008	641.592		194	55.5368	806.405		40.5175	75.558		55.4535	240.371													52098.6	51991.8
193	71.9589	954.567		193	36.6116	739.543		193	44.8157	899.588		27.1432	54.979		35.3473	215.024													46979.7	34829.9
192	44.8185	1003.11		192	31.7546	852.045		192	36.9378	972.044		7.8807	31.066		13.0639	151.065													40747.3	10112.5
191	19.4548	1021.21		191	20.079	945.814		191	21.5627	1013.64		-2.1079	7.57		-0.6242	75.396													25765.2	-2704.84
190	9.20961	1021.51		190	8.93682	1002.33		190	11.0549	1021.53		-1.84529	-0.02		0.27279	19.18													11467.7	-2367.86
189	4.04197	1021.49		189	7.61455	1018.96		189	9.9087	1021.54		-5.86673	-0.05		-3.57258	2.53													9770.93	-7528.14
188	2.53347	1021.49		188	10.4599	1021.36		188	3.61566	1021.51		-1.08219	-0.02		-7.92643	0.13													13422.1	-1388.66
187	5.05056	1021.5		187	5.90633	1021.36		187	4.49851	1021.52		0.55205	-0.02		-0.85577	0.14													7578.96	708.386
186	-0.148713	1021.48		186	7.27002	1021.37		186	4.1474	1021.52		-4.29611	-0.04		-7.41873	0.11													9328.83	-5512.74
185	0.833633	1021.48		185	4.68132	1021.36		185	-1.44352	1021.5		2.27715	-0.02		-3.84769	0.12													6007.03	2922.03

## Sheet: 40bp 601
KER apo
Wavelength [nm]	CD [mdeg]	HT [V]
350	0.451351	262.386
349	0.442222	262.403
348	0.480829	262.407
347	0.519455	262.393
346	0.540437	262.364
345	0.528143	262.31
344	0.455147	262.265
343	0.4119	262.212
342	0.372941	262.184
341	0.399596	262.157
340	0.422306	262.144
339	0.474154	262.132
338	0.49413	262.134
337	0.46156	262.152
336	0.445068	262.197
335	0.392112	262.26
334	0.397361	262.332
333	0.415729	262.412
332	0.400286	262.482
331	0.349187	262.557
330	0.37921	262.634
329	0.385872	262.713
328	0.360452	262.775
327	0.308036	262.826
326	0.222841	262.847
325	0.238572	262.812
324	0.204228	262.771
323	0.244006	262.834
322	0.265365	262.962
321	0.224814	263.129
320	0.219308	263.232
319	0.212973	263.303
318	0.233942	263.369
317	0.23622	263.417
316	0.194257	263.442
315	0.184584	263.422
314	0.136415	263.416
313	0.171907	263.493
312	0.134676	263.646
311	0.166121	263.86
310	0.181971	264.031
309	0.233763	264.182
308	0.229721	264.335
307	0.259312	264.523
306	0.282017	264.747
305	0.325041	265.004
304	0.406915	265.303
303	0.485308	265.659
302	0.573282	266.087
301	0.716457	266.589
300	0.880897	267.184
299	1.08927	267.885
298	1.34768	268.717
297	1.68219	269.709
296	2.06707	270.854
295	2.46682	272.177
294	2.8689	273.639
293	3.33771	275.142
292	3.81969	276.739
291	4.39375	278.622
290	4.88327	280.643
289	5.5537	282.831
288	6.10569	284.88
287	6.6015	286.922
286	7.06592	289.037
285	7.42623	291.222
284	7.75278	293.447
283	8.05572	295.676
282	8.18866	297.877
281	8.28856	300.04
280	8.33052	302.199
279	8.39602	304.356
278	8.53142	306.543
277	8.53358	308.726
276	8.59352	310.919
275	8.51999	313.105
274	8.50528	315.29
273	8.31657	317.445
272	8.09872	319.536
271	7.75212	321.517
270	7.36083	323.495
269	6.89791	325.518
268	6.25907	327.72
267	5.56956	329.996
266	4.85762	332.34
265	4.06602	334.742
264	3.2366	337.169
263	2.24591	339.561
262	1.24749	341.823
261	0.257423	343.916
260	-0.754768	345.769
259	-2.08461	347.322
258	-3.40991	348.556
257	-4.86262	349.461
256	-6.1739	350.086
255	-7.50543	350.456
254	-8.6544	350.566
253	-9.85945	350.422
252	-10.8944	350.005
251	-11.9011	349.292
250	-12.9166	348.266
249	-13.5001	346.931
248	-13.7125	345.43
247	-13.6574	343.848
246	-13.4583	342.227
245	-13.137	340.607
244	-12.5684	338.965
243	-11.8246	337.4
242	-11.1644	335.946
241	-10.2547	334.632
240	-9.46824	333.509
239	-8.70261	332.586
238	-7.98735	331.89
237	-7.33034	331.42
236	-6.61434	331.18
235	-5.88059	331.187
234	-5.16484	331.457
233	-4.43682	331.97
232	-3.68854	332.762
231	-2.8268	333.715
230	-1.90425	335.053
229	-1.1621	336.747
228	-0.438997	338.833
227	0.284217	341.231
226	1.16077	343.879
225	1.9824	346.873
224	2.76875	350.259
223	3.35499	354.056
222	3.9841	358.268
221	4.45034	362.861
220	4.63337	367.789
219	4.39005	372.993
218	3.51763	378.453
217	2.36487	384.16
216	0.849143	390.123
215	-0.892119	396.374
214	-2.97401	402.956
213	-5.13794	409.933
212	-7.34594	417.338
211	-9.25491	425.126
210	-10.9632	433.237
209	-11.7559	441.629
208	-11.7764	450.304
207	-10.5491	459.264
206	-8.57171	468.542
205	-6.29352	478.225
204	-2.8006	488.495
203	0.866847	499.667
202	6.76032	512.12
201	13.0318	526.334
200	20.9045	542.953
199	28.3346	562.928
198	36.9068	587.834
197	44.6729	620.182
196	52.9925	663.98
195	54.857	724.354
194	55.5368	806.405
193	44.8157	899.588
192	36.9378	972.044
191	21.5627	1013.64
190	11.0549	1021.53
189	9.9087	1021.54
188	3.61566	1021.51
187	4.49851	1021.52
186	4.1474	1021.52
185	-1.44352	1021.5

## Sheet: Melting
KER Apo				KER:40bp
Temperature [C]	CD [mdeg]	HT [V]		Temperature [C]	CD [mdeg]	HT [V]
19.96	-24.4186	324.833		19.99	-24.3123	367.608
21.04	-23.6908	324.889		21.02	-24.2373	367.644
22.02	-23.6446	325.049		22.05	-25.2437	367.885
23.01	-22.9995	325.271		23.04	-25.1782	368.221
24.01	-22.6022	325.455		24.02	-24.0916	368.5
25.05	-21.817	325.695		25.02	-24.2281	368.797
26.06	-21.5397	325.858		26.01	-23.8621	369.094
27.02	-21.0173	326.008		27.03	-23.9311	369.439
28.03	-20.3356	326.262		28.02	-23.4359	369.737
29.05	-19.9834	326.443		29.06	-22.8934	370.024
30.03	-19.6616	326.66		30.01	-23.3755	370.261
31.04	-19.6118	326.87		31.04	-23.1688	370.528
32.05	-18.586	327.04		32.03	-22.1086	370.762
33.07	-18.2535	327.277		33.04	-22.7968	371.095
34.02	-17.6793	327.549		34.06	-22.2297	371.448
35.04	-17.4226	327.749		35.05	-21.525	371.747
36.04	-17.155	328.063		36.03	-21.1638	372.123
37.04	-16.4043	328.313		37.05	-20.7094	372.515
38.04	-15.7305	328.564		38.05	-21.5288	372.834
39.02	-15.5675	328.799		39.03	-20.1772	373.214
40.04	-14.6745	329.081		40.04	-20.0699	373.529
41.01	-14.339	329.341		41.03	-19.7173	374.025
42.07	-14.1904	329.67		42.03	-19.8767	374.56
43.06	-13.6948	329.95		43.05	-19.1204	374.309
44.04	-13.0457	330.267		44.01	-18.7511	374.66
45.05	-12.6287	330.525		45.06	-18.6357	375.149
46.01	-12.4799	330.914		46.01	-18.1074	375.466
47.06	-12.177	331.277		47.04	-17.6029	375.856
48.04	-11.3536	331.53		48.07	-16.7972	376.262
49.03	-10.9406	331.983		49.02	-16.7884	376.701
50.01	-10.9591	332.339		50.05	-17.0057	377.026
51.05	-10.1767	332.709		51.02	-15.0655	377.428
52.03	-10.5058	333.079		52.05	-15.3109	377.887
53.05	-9.58231	333.443		53.05	-14.5262	378.342
54.01	-9.8277	333.844		54.04	-13.9088	378.865
55.08	-9.14269	334.203		55.04	-13.4261	379.397
56.06	-8.55665	334.562		56.03	-13.0072	379.828
57.04	-8.71247	335.018		57.05	-12.4384	380.335
58.06	-8.05858	335.475		58.03	-12.0176	380.814
59.05	-8.36071	335.893		59.06	-11.1661	381.368
60.03	-7.57088	336.369		59.99	-10.2572	381.88
61.05	-7.76839	336.834		61.02	-9.06907	382.4
62.05	-7.25287	337.249		62.06	-9.14108	382.937
63.02	-7.57774	337.768		63.04	-8.67528	383.579
64.04	-6.81408	338.162		64.04	-8.11828	384.196
65.04	-6.65043	338.687		65.05	-7.32589	384.793
66.07	-6.82329	339.152		66	-7.50142	385.514
67.02	-6.21658	339.676		67.01	-6.99301	386.026
68	-6.45042	340.177		68.07	-5.8985	386.851
69.01	-6.08502	340.756		69.01	-5.1881	387.348
70.04	-6.10738	341.335		70.06	-5.57493	388.081
71.05	-6.16588	341.875		71.03	-4.43567	388.917
72.04	-5.40935	342.53		72.03	-5.18958	389.697
73.08	-5.66013	343.186		73.04	-4.83787	390.435
74.02	-5.56947	343.636		74.07	-4.93433	391.431
75.03	-5.70246	344.191		75.06	-4.41308	392.209
76.03	-5.23987	344.82		76.01	-3.76453	393.266
77.05	-4.91241	345.517		77.09	-4.52659	394.458
78.02	-6.02876	346.088		78.04	-4.27476	395.501
79.06	-5.90348	346.732		79.03	-3.58849	396.793
80.03	-5.2782	347.426		80.03	-3.652	398.503
81.05	-5.62377	348.084		81.02	-3.7827	400.281
82.06	-6.28007	348.8		82.05	-3.35921	402.342
83.04	-5.43897	349.541		83.01	-3.39184	405.566
84.05	-5.39359	350.191		84.02	-3.07495	408.375
85.07	-4.08285	351.007		85.04	-4.01603	411.131
86.04	-5.05073	351.766		86.06	-3.39862	411.618
87.06	-4.54911	352.552		87.04	-3.27076	412.869
88.02	-5.00834	353.518		88.07	-3.11721	413.936
89.01	-5.01398	354.075		89.02	-3.04922	414.939
90.06	-4.1911	355.108		90.07	-4.78075	415.797
91.03	-5.01941	356.02		91.01	-3.75992	416.945
92.01	-4.36099	356.765		92.01	-4.30715	418.171
93.03	-4.39788	357.748		93.07	-3.57959	419.344
94.02	-4.82009	358.698		94.07	-3.7642	421.815
95.03	-4.86745	359.762		95.01	-4.09535	423.181
96.09	-4.86872	360.698		96.07	-3.94169	424.213
97.06	-5.00313	361.628		97.06	-4.26559	425.492
98.03	-4.76232	362.886		98.07	-1.66729	426.078
99.05	-4.97775	363.965		99.02	-5.05785	427.449
100.06	-4.39196	365.096		100.05	-3.42478	428.765

## Sheet: Helicity
	KER	KER
	Apo	In complex	100 % a-helix
m at 222nm (mdeg)	-23.7628	-28.6379
L (cm)	0.1
C (g/L)	0.1
M (g/mol)	11933.7
n (#aa)	94
[q]MRW (degcm2/dmol/res)	-30167.9	-36357	-38000		-3572000
hellicity (%)	79.3891	95.6763
