# Supplementary material for: A novel single alpha-helix DNA-binding domain in CAF-1 promotes gene silencing and DNA damage survival through tetrasome-length DNA selectivity and spacer function
Source: eLife journal article supplement (doi:10.7554/elife.83538), 2023-06-14
Supplement: fig2-data1 [file KER 40bp 601 meltn1.xlsx]

## Sheet: Sheet1
Temperature [C]	CD [mdeg]	HT [V]
19.99	-24.3123	367.608
21.02	-24.2373	367.644
22.05	-25.2437	367.885
23.04	-25.1782	368.221
24.02	-24.0916	368.5
25.02	-24.2281	368.797
26.01	-23.8621	369.094
27.03	-23.9311	369.439
28.02	-23.4359	369.737
29.06	-22.8934	370.024
30.01	-23.3755	370.261
31.04	-23.1688	370.528
32.03	-22.1086	370.762
33.04	-22.7968	371.095
34.06	-22.2297	371.448
35.05	-21.525	371.747
36.03	-21.1638	372.123
37.05	-20.7094	372.515
38.05	-21.5288	372.834
39.03	-20.1772	373.214
40.04	-20.0699	373.529
41.03	-19.7173	374.025
42.03	-19.8767	374.56
43.05	-19.1204	374.309
44.01	-18.7511	374.66
45.06	-18.6357	375.149
46.01	-18.1074	375.466
47.04	-17.6029	375.856
48.07	-16.7972	376.262
49.02	-16.7884	376.701
50.05	-17.0057	377.026
51.02	-15.0655	377.428
52.05	-15.3109	377.887
53.05	-14.5262	378.342
54.04	-13.9088	378.865
55.04	-13.4261	379.397
56.03	-13.0072	379.828
57.05	-12.4384	380.335
58.03	-12.0176	380.814
59.06	-11.1661	381.368
59.99	-10.2572	381.88
61.02	-9.06907	382.4
62.06	-9.14108	382.937
63.04	-8.67528	383.579
64.04	-8.11828	384.196
65.05	-7.32589	384.793
66	-7.50142	385.514
67.01	-6.99301	386.026
68.07	-5.8985	386.851
69.01	-5.1881	387.348
70.06	-5.57493	388.081
71.03	-4.43567	388.917
72.03	-5.18958	389.697
73.04	-4.83787	390.435
74.07	-4.93433	391.431
75.06	-4.41308	392.209
76.01	-3.76453	393.266
77.09	-4.52659	394.458
78.04	-4.27476	395.501
79.03	-3.58849	396.793
80.03	-3.652	398.503
81.02	-3.7827	400.281
82.05	-3.35921	402.342
83.01	-3.39184	405.566
84.02	-3.07495	408.375
85.04	-4.01603	411.131
86.06	-3.39862	411.618
87.04	-3.27076	412.869
88.07	-3.11721	413.936
89.02	-3.04922	414.939
90.07	-4.78075	415.797
91.01	-3.75992	416.945
92.01	-4.30715	418.171
93.07	-3.57959	419.344
94.07	-3.7642	421.815
95.01	-4.09535	423.181
96.07	-3.94169	424.213
97.06	-4.26559	425.492
98.07	-1.66729	426.078
99.02	-5.05785	427.449
100.05	-3.42478	428.765
