# Supplementary material for: A novel single alpha-helix DNA-binding domain in CAF-1 promotes gene silencing and DNA damage survival through tetrasome-length DNA selectivity and spacer function
Source: eLife journal article supplement (doi:10.7554/elife.83538), 2023-06-14
Supplement: fig2-data1 [file KER melt at 222nmn1.xlsx]

## Sheet: Sheet1
Temperature [C]	CD [mdeg]	HT [V]
19.96	-24.4186	324.833
21.04	-23.6908	324.889
22.02	-23.6446	325.049
23.01	-22.9995	325.271
24.01	-22.6022	325.455
25.05	-21.817	325.695
26.06	-21.5397	325.858
27.02	-21.0173	326.008
28.03	-20.3356	326.262
29.05	-19.9834	326.443
30.03	-19.6616	326.66
31.04	-19.6118	326.87
32.05	-18.586	327.04
33.07	-18.2535	327.277
34.02	-17.6793	327.549
35.04	-17.4226	327.749
36.04	-17.155	328.063
37.04	-16.4043	328.313
38.04	-15.7305	328.564
39.02	-15.5675	328.799
40.04	-14.6745	329.081
41.01	-14.339	329.341
42.07	-14.1904	329.67
43.06	-13.6948	329.95
44.04	-13.0457	330.267
45.05	-12.6287	330.525
46.01	-12.4799	330.914
47.06	-12.177	331.277
48.04	-11.3536	331.53
49.03	-10.9406	331.983
50.01	-10.9591	332.339
51.05	-10.1767	332.709
52.03	-10.5058	333.079
53.05	-9.58231	333.443
54.01	-9.8277	333.844
55.08	-9.14269	334.203
56.06	-8.55665	334.562
57.04	-8.71247	335.018
58.06	-8.05858	335.475
59.05	-8.36071	335.893
60.03	-7.57088	336.369
61.05	-7.76839	336.834
62.05	-7.25287	337.249
63.02	-7.57774	337.768
64.04	-6.81408	338.162
65.04	-6.65043	338.687
66.07	-6.82329	339.152
67.02	-6.21658	339.676
68	-6.45042	340.177
69.01	-6.08502	340.756
70.04	-6.10738	341.335
71.05	-6.16588	341.875
72.04	-5.40935	342.53
73.08	-5.66013	343.186
74.02	-5.56947	343.636
75.03	-5.70246	344.191
76.03	-5.23987	344.82
77.05	-4.91241	345.517
78.02	-6.02876	346.088
79.06	-5.90348	346.732
80.03	-5.2782	347.426
81.05	-5.62377	348.084
82.06	-6.28007	348.8
83.04	-5.43897	349.541
84.05	-5.39359	350.191
85.07	-4.08285	351.007
86.04	-5.05073	351.766
87.06	-4.54911	352.552
88.02	-5.00834	353.518
89.01	-5.01398	354.075
90.06	-4.1911	355.108
91.03	-5.01941	356.02
92.01	-4.36099	356.765
93.03	-4.39788	357.748
94.02	-4.82009	358.698
95.03	-4.86745	359.762
96.09	-4.86872	360.698
97.06	-5.00313	361.628
98.03	-4.76232	362.886
99.05	-4.97775	363.965
100.06	-4.39196	365.096
