# Supplementary material for: A novel single alpha-helix DNA-binding domain in CAF-1 promotes gene silencing and DNA damage survival through tetrasome-length DNA selectivity and spacer function
Source: eLife journal article supplement (doi:10.7554/elife.83538), 2023-06-14
Supplement: fig2-data1 [file Melt KER Apon2.xlsx]

## Sheet: Sheet1
Temperature [C]	CD [mdeg]	HT [V]
4.11	-31.7076	318.662
4.21	-31.7043	318.682
4.45	-31.6772	318.709
4.67	-31.8401	318.717
4.85	-31.8566	318.658
5.05	-31.6717	318.706
5.21	-32.273	318.692
5.43	-31.8381	318.739
5.63	-32.082	318.746
5.86	-31.6344	318.741
6.03	-31.7615	318.775
6.23	-31.5442	318.76
6.43	-31.8599	318.767
6.65	-30.9391	318.744
6.81	-31.3254	318.777
7.01	-31.2617	318.777
7.25	-30.6964	318.79
7.42	-31.3112	318.754
7.61	-30.8241	318.69
7.83	-30.8304	318.735
8.04	-30.8115	318.733
8.23	-30.8793	318.742
8.42	-30.8724	318.734
8.65	-31.158	318.756
8.83	-30.6318	318.761
9.05	-30.3181	318.775
9.25	-30.5595	318.793
9.43	-30.2481	318.766
9.66	-30.0908	318.779
9.82	-30.1746	318.775
10.02	-29.9943	318.785
10.24	-30.0154	318.772
10.42	-30.0536	318.793
10.65	-30.0515	318.778
10.82	-29.8944	318.775
11.02	-29.8517	318.788
11.23	-29.5212	318.721
11.41	-29.5144	318.782
11.64	-29.2407	318.789
11.84	-29.2371	318.778
12.05	-29.4985	318.756
12.23	-28.931	318.767
12.44	-29.0955	318.812
12.65	-29.4156	318.822
12.85	-29.3225	318.772
13.04	-29.3025	318.769
13.24	-29.0166	318.784
13.43	-28.6543	318.794
13.63	-29.2929	318.826
13.82	-29.0809	318.826
14.04	-29.1192	318.825
14.23	-28.9748	318.823
14.44	-28.5302	318.794
14.65	-29.0227	318.81
14.85	-28.0015	318.819
15.02	-28.679	318.835
15.24	-28.3756	318.817
15.42	-28.3853	318.844
15.63	-28.2168	318.861
15.87	-27.8329	318.842
16.04	-27.9779	318.855
16.23	-27.6259	318.831
16.43	-27.8059	318.86
16.64	-27.9339	318.875
16.84	-27.6815	318.82
17.01	-27.5697	318.85
17.21	-27.1014	318.871
17.42	-26.844	318.896
17.61	-27.2636	318.856
17.86	-27.4206	318.877
18.03	-27.4836	318.857
18.22	-27.0021	318.865
18.42	-27.0473	318.86
18.64	-26.7129	318.851
18.85	-26.9432	318.869
19.04	-26.8486	318.875
19.24	-26.9927	318.879
19.43	-26.2163	318.85
19.61	-26.432	318.835
19.85	-26.4899	318.864
20.02	-25.7958	318.836
20.23	-25.9576	318.867
20.43	-26.5432	318.746
20.63	-25.827	318.781
20.85	-25.9544	318.825
21.03	-26.4494	318.796
21.26	-25.973	318.829
21.44	-25.5243	318.821
21.65	-25.6277	318.761
21.82	-25.7965	318.78
22.04	-25.5304	318.792
22.24	-25.7211	318.827
22.42	-25.36	318.854
22.63	-25.0634	318.71
22.84	-25.1005	318.749
23.05	-24.9258	318.748
23.25	-24.2204	318.783
23.44	-24.9023	318.787
23.64	-24.6273	318.829
23.81	-25.0013	318.806
24.04	-24.4807	318.868
24.24	-24.3133	318.864
24.45	-24.2273	318.851
24.63	-24.3084	318.856
24.82	-24.1122	318.893
25.05	-23.7466	318.861
25.26	-23.5606	318.898
25.45	-23.5032	318.92
25.62	-23.7302	318.917
25.83	-23.7275	318.894
26.04	-23.6135	318.918
26.23	-23.5378	318.907
26.44	-23.3328	318.881
26.65	-23.4572	318.905
26.84	-22.9227	318.886
27.06	-22.9713	318.892
27.27	-22.9632	318.912
27.45	-22.8313	318.868
27.62	-22.2959	318.892
27.83	-23.0265	318.918
28.05	-22.7077	318.907
28.25	-23.0604	318.914
28.45	-22.8412	318.926
28.65	-21.9267	318.927
28.81	-22.4279	318.928
29.01	-22.4412	318.945
29.23	-21.8283	318.893
29.44	-21.9143	318.873
29.67	-21.7518	318.881
29.82	-21.9836	318.879
30.03	-21.5815	318.883
30.23	-21.1172	318.889
30.45	-21.3593	318.873
30.64	-21.5359	318.861
30.84	-21.3258	318.876
31.04	-20.4648	318.847
31.24	-20.9798	318.86
31.45	-20.8049	318.877
31.6	-20.3337	318.891
31.82	-20.3751	318.882
32.06	-20.555	318.925
32.25	-20.025	318.905
32.44	-20.3119	318.906
32.65	-19.9381	318.924
32.83	-20.4347	318.937
33.02	-20.3552	318.941
33.2	-19.4741	318.881
33.46	-19.8106	318.933
33.62	-19.7209	318.938
33.83	-19.2442	318.946
34.02	-19.8497	318.932
34.24	-19.2357	318.971
34.47	-19.5792	318.914
34.64	-19.1281	318.928
34.82	-18.9233	318.921
35.03	-18.8158	318.923
35.25	-18.7394	318.972
35.45	-18.967	318.965
35.63	-18.2814	318.954
35.82	-18.5427	318.968
36.04	-18.3703	318.965
36.24	-18.3796	318.949
36.44	-18.4406	318.965
36.67	-18.2377	318.922
36.83	-17.8431	318.942
37.01	-17.6424	318.968
37.25	-17.4542	318.886
37.44	-17.5909	318.958
37.65	-17.3815	318.965
37.83	-17.6653	318.973
38.01	-17.2842	318.954
38.26	-16.7952	318.898
38.43	-17.3479	318.919
38.62	-16.8356	318.979
38.85	-17.0359	318.959
39.06	-17.0039	318.956
39.25	-17.065	318.99
39.43	-16.7566	318.966
39.65	-16.5229	318.964
39.82	-16.3608	318.98
40.03	-16.138	319.016
40.22	-16.1803	318.998
40.46	-16.0159	319.016
40.61	-16.4778	319.01
40.85	-16.0518	319.002
41.04	-16.3203	319.008
41.23	-16.1663	318.981
41.41	-15.5282	318.951
41.66	-15.8908	318.983
41.86	-15.34	318.992
42.03	-15.5894	319.003
42.22	-15.5899	319.027
42.44	-15.0433	319.029
42.62	-15.2786	319.057
42.86	-15.0721	319.015
43.07	-14.8581	319.05
43.21	-14.9031	319.052
43.46	-14.967	319.043
43.64	-15.0806	319.075
43.84	-14.083	319.102
44.06	-14.6468	319.075
44.25	-14.454	319.098
44.44	-14.2481	319.063
44.63	-13.8393	319.063
44.84	-13.6898	319.066
45.03	-14.0056	319.083
45.25	-14.0832	319.066
45.45	-13.8037	319.096
45.65	-13.6644	319.095
45.83	-13.9115	319.073
46.02	-13.7615	319.081
46.26	-13.7807	319.095
46.44	-13.3571	319.08
46.64	-13.3042	319.099
46.83	-13.3183	319.071
47.04	-13.1528	319.079
47.26	-12.6626	319.093
47.42	-12.4466	319.09
47.67	-12.6443	319.076
47.85	-12.1925	319.091
48.06	-12.9444	319.087
48.23	-12.9651	319.121
48.42	-12.7537	319.064
48.65	-12.1885	319.09
48.85	-12.3401	319.103
49.05	-12.1013	319.097
49.25	-12.2657	319.095
49.41	-11.9142	319.082
49.64	-12.303	319.093
49.82	-12.2744	319.046
50.05	-11.5501	319.041
50.22	-11.7305	319.061
50.42	-12.0218	319.082
50.66	-11.8218	319.081
50.83	-11.3923	319.107
51.03	-11.7323	319.09
51.24	-11.3427	319.105
51.43	-11.2757	319.102
51.64	-11.0903	319.052
51.82	-11.3137	319.07
52.02	-11.336	319.075
52.25	-10.8828	319.101
52.44	-10.5712	319.116
52.64	-10.9527	319.119
52.88	-11.0171	319.167
53.06	-11.5714	319.144
53.22	-10.4915	319.197
53.46	-10.5668	319.157
53.62	-10.9082	319.18
53.86	-10.108	319.176
54.02	-10.3611	319.191
54.24	-10.5095	319.206
54.43	-10.3764	319.224
54.65	-10.3751	319.251
54.86	-10.4843	319.264
55.05	-10.238	319.297
55.24	-10.2632	319.335
55.45	-10.1316	319.295
55.66	-10.0604	319.314
55.83	-10.3079	319.332
56.01	-10.1054	319.338
56.26	-9.23618	319.359
56.47	-10.1371	319.353
56.63	-9.66829	319.378
56.8	-9.72666	319.431
57.04	-9.22808	319.409
57.24	-9.45486	319.448
57.45	-9.3152	319.45
57.62	-9.78474	319.44
57.83	-8.62539	319.471
58.02	-9.20059	319.517
58.25	-9.47776	319.513
58.48	-9.17297	319.506
58.63	-9.47974	319.522
58.84	-9.18904	319.554
59.07	-8.8759	319.57
59.22	-9.41658	319.586
59.44	-8.74256	319.603
59.63	-8.56933	319.604
59.88	-8.96851	319.623
60.06	-8.9665	319.623
60.23	-8.57672	319.652
60.47	-8.74229	319.725
60.71	-8.55383	319.724
60.87	-8.87408	319.75
61	-8.29479	319.76
61.23	-8.47305	319.752
61.46	-8.43996	319.728
61.63	-8.6816	319.752
61.84	-8.43288	319.299
62.02	-8.4721	319.3
62.26	-8.68518	319.299
62.45	-8.15654	319.278
62.64	-8.33407	319.275
62.85	-8.18733	319.326
63.07	-8.07018	319.306
63.22	-8.41957	319.32
63.42	-7.688	319.321
63.62	-7.71439	319.336
63.87	-8.19969	319.338
64.06	-8.10429	319.286
64.22	-8.37184	319.315
64.46	-8.39049	319.34
64.68	-7.83053	319.344
64.83	-8.1142	319.364
65.08	-8.0945	319.383
65.21	-7.89406	319.387
65.43	-7.74141	319.38
65.66	-7.99872	319.409
65.8	-8.29454	319.411
66	-8.18557	319.412
66.22	-7.45798	319.374
66.47	-7.82272	319.357
66.62	-7.44697	319.437
66.84	-7.69852	319.414
67.03	-7.20842	319.426
67.22	-7.56783	319.45
67.45	-7.55949	319.492
67.61	-7.53916	319.487
67.83	-7.73546	319.491
68.01	-7.26409	319.478
68.2	-6.92185	319.499
68.4	-7.55728	319.508
68.66	-7.34683	319.492
68.85	-7.69135	319.527
69.01	-7.25507	319.504
69.23	-7.38784	319.535
69.43	-7.57226	319.554
69.66	-7.23258	319.516
69.84	-7.13861	319.549
70.01	-7.38397	319.514
70.22	-6.8815	319.527
70.41	-7.01536	319.556
70.61	-6.82978	319.529
70.85	-6.98334	319.542
71.03	-6.66722	319.549
71.21	-6.69778	319.539
71.45	-7.01755	319.53
71.67	-6.59512	319.55
71.82	-6.94888	319.525
72.04	-7.10031	319.575
72.23	-6.53055	319.589
72.49	-6.82988	319.562
72.62	-6.63602	319.601
72.83	-6.97281	319.58
73.04	-6.72879	319.609
73.26	-6.63224	319.602
73.45	-6.9057	319.61
73.63	-6.38373	319.601
73.82	-6.33072	319.61
74.08	-6.26718	319.649
74.25	-6.50315	319.589
74.42	-6.42492	319.631
74.62	-6.14796	319.666
74.83	-6.09623	319.684
75.05	-6.6288	319.696
75.23	-6.55404	319.701
75.41	-6.77447	319.686
75.65	-6.58743	319.72
75.84	-6.85889	319.728
76.04	-5.8952	319.749
76.22	-6.40676	319.706
76.44	-6.01886	319.742
76.64	-5.97157	319.778
76.85	-6.44756	319.778
77.08	-6.40825	319.782
77.21	-6.51581	319.739
77.45	-6.45348	319.771
77.62	-6.24066	319.81
77.84	-6.21475	319.835
78.09	-6.95187	319.833
78.25	-5.89351	319.833
78.44	-6.00273	319.81
78.63	-6.06358	319.852
78.84	-6.16556	319.817
79.05	-5.99846	319.835
79.24	-6.36694	319.845
79.44	-6.1919	319.856
79.63	-6.13416	319.873
79.83	-6.67005	319.857
80.04	-6.12441	319.861
80.21	-5.77241	319.921
80.45	-6.78372	319.935
80.64	-5.80235	319.913
80.85	-5.84608	319.909
81.01	-6.10076	319.931
81.26	-6.46393	319.946
81.45	-6.00312	319.938
81.64	-6.52757	319.944
81.87	-5.70251	319.975
82.03	-6.32493	319.943
82.23	-5.46552	319.984
82.42	-5.53823	319.981
82.65	-5.81394	319.985
82.87	-5.74176	319.97
83.08	-6.34953	320
83.25	-5.78089	320.045
83.44	-5.79113	320.079
83.66	-5.24119	320.077
83.86	-5.51423	320.041
84.06	-5.71248	320.069
84.2	-5.5646	320.068
84.46	-5.63768	320.1
84.63	-5.33881	320.112
84.86	-5.42687	320.119
85.02	-6.09387	320.172
85.26	-5.61768	320.198
85.44	-5.90718	320.155
85.65	-5.2324	320.179
85.84	-5.96258	320.196
86.05	-5.64616	320.168
86.24	-5.97626	320.199
86.44	-5.71442	320.186
86.67	-5.71657	320.185
86.85	-5.73862	320.143
87.03	-5.38878	320.218
87.27	-5.06834	320.205
87.42	-5.65155	320.104
87.62	-5.99321	320.163
87.86	-5.28731	320.187
88.06	-5.37421	320.239
88.22	-5.7265	320.26
88.47	-5.35695	320.266
88.63	-5.33107	320.276
88.81	-5.60812	320.322
89.05	-5.68748	320.332
89.25	-5.23267	320.348
89.47	-5.63658	320.374
89.62	-5.51591	320.361
89.9	-5.43302	320.363
90.08	-5.80634	320.363
90.26	-5.62825	320.331
90.42	-5.05271	320.361
90.68	-5.3553	320.419
90.88	-5.73869	320.417
91.04	-5.5444	320.397
91.21	-5.97756	320.451
91.46	-5.69053	320.412
91.66	-5.35813	320.467
91.82	-5.32901	320.3
92.07	-5.37872	320.359
92.29	-5.35512	320.364
92.44	-5.33787	320.464
92.68	-5.05531	320.527
92.93	-5.17238	320.505
93.06	-4.72117	320.46
93.21	-5.45117	320.479
93.43	-5.51342	320.567
93.71	-5.49372	320.56
93.88	-5.44491	320.559
94.04	-5.48006	320.592
94.21	-4.89206	320.619
94.43	-5.27827	320.605
94.66	-5.31183	320.543
94.89	-5.56574	320.559
95.09	-4.85701	320.584
95.22	-5.47399	320.597
95.48	-5.14011	320.601
95.68	-4.90066	320.642
95.89	-4.94882	320.621
96.03	-5.31647	320.592
96.31	-5.18208	320.691
96.48	-5.32049	320.671
96.62	-4.82153	320.687
96.85	-5.30798	320.738
97.06	-5.15782	320.777
97.27	-4.71464	320.82
97.43	-5.17777	320.835
97.63	-5.3251	320.892
97.86	-5.34224	320.877
98.07	-5.66076	320.813
98.26	-5.29012	320.879
98.48	-5.47129	320.905
98.7	-5.76409	320.901
98.9	-4.99575	320.92
99.03	-5.02632	320.931
99.28	-5.0782	321.056
99.51	-5.18969	321.063
99.67	-5.27801	321.07
99.85	-4.45638	321.153
100.05	-4.68114	321.148
