# Supplementary material for: A novel single alpha-helix DNA-binding domain in CAF-1 promotes gene silencing and DNA damage survival through tetrasome-length DNA selectivity and spacer function
Source: eLife journal article supplement (doi:10.7554/elife.83538), 2023-06-14
Supplement: fig2-data1 [file Melt KER40bpn2.xlsx]

## Sheet: Sheet1
Temperature [C]	CD [mdeg]	HT [V]
4.16	-30.8732	360.144
4.23	-30.7809	360.098
4.43	-30.4031	360.161
4.65	-31.0622	360.117
4.82	-30.5599	360.156
5.04	-30.5769	360.137
5.22	-30.3163	360.114
5.44	-30.4653	360.114
5.63	-30.9306	360.108
5.85	-29.8659	360.106
6.05	-30.153	360.09
6.25	-30.7651	360.025
6.41	-30.28	360.081
6.64	-30.5454	360.087
6.83	-30.4139	360.105
7.01	-30.1241	360.1
7.25	-30.5367	360.129
7.43	-31.1296	360.136
7.64	-30.783	360.151
7.84	-30.0301	360.177
8.02	-30.0215	360.164
8.24	-30.7526	360.133
8.45	-29.7318	360.124
8.62	-30.0187	360.15
8.81	-30.503	360.095
9.02	-30.1899	360.118
9.24	-30.0458	360.12
9.43	-30.2529	360.145
9.65	-30.1235	360.182
9.87	-29.9382	360.152
10.02	-30.0757	360.137
10.23	-29.8988	360.174
10.41	-29.793	360.151
10.63	-30.1344	360.122
10.84	-29.9054	360.077
11.03	-30.215	360.086
11.24	-30.0115	360.108
11.42	-29.9325	360.134
11.61	-29.2235	360.136
11.84	-29.9888	360.107
12.04	-29.7148	360.114
12.24	-29.0864	360.076
12.44	-28.9764	360.131
12.63	-29.6679	360.055
12.82	-29.8098	360.073
13.02	-30.1036	360.084
13.23	-29.9081	360.086
13.44	-28.7885	360.104
13.63	-29.5692	360.091
13.85	-29.4651	360.097
14.04	-29.0846	360.059
14.22	-29.0902	360.072
14.44	-29.7958	360.072
14.62	-29.5931	360.085
14.85	-29.8055	360.094
15.02	-29.2848	360.12
15.23	-29.0146	360.137
15.44	-29.0171	360.072
15.64	-29.2044	360.092
15.84	-28.8796	360.129
16.05	-28.9541	360.095
16.24	-29.2873	360.086
16.46	-29.0611	360.108
16.63	-28.9583	360.096
16.82	-28.6495	360.117
17.04	-29.0103	360.134
17.24	-28.571	360.132
17.43	-28.4858	360.127
17.63	-28.2091	360.112
17.85	-29.0541	360.075
18.02	-28.4048	360.114
18.23	-28.9734	360.113
18.44	-28.7313	360.104
18.64	-28.4596	360.118
18.86	-28.9137	360.133
19.04	-28.4571	360.088
19.24	-28.4586	360.132
19.45	-28.0504	360.12
19.61	-28.0336	360.125
19.84	-29.3339	360.151
20.03	-28.3263	360.146
20.24	-28.9744	360.145
20.44	-28.4472	360.154
20.67	-28.3489	360.171
20.8	-27.8276	360.174
21.04	-28.1988	360.177
21.24	-28.3425	360.18
21.44	-27.9676	360.187
21.64	-28.6194	360.185
21.83	-27.6428	360.193
22.02	-27.3829	360.215
22.24	-28.0175	360.223
22.48	-28.3668	360.2
22.63	-28.259	360.253
22.82	-27.8738	360.148
23.04	-28.1866	360.207
23.26	-27.8435	360.174
23.43	-28.9776	360.2
23.63	-27.9793	360.189
23.83	-27.1861	360.187
24.02	-27.5227	360.147
24.24	-28.0906	360.163
24.42	-28.7812	360.165
24.65	-27.6981	360.154
24.82	-27.9439	360.157
25.06	-27.0076	360.155
25.24	-27.434	360.117
25.42	-27.0016	360.132
25.64	-26.7552	360.104
25.85	-27.168	360.078
26.03	-26.9911	360.142
26.23	-27.4667	360.084
26.45	-27.4912	360.125
26.64	-27.1313	360.09
26.82	-27.9467	360.118
27.02	-27.4557	360.067
27.25	-26.674	360.086
27.43	-27.3766	360.11
27.65	-26.9889	360.104
27.85	-27.2375	360.136
28.06	-26.9495	360.147
28.25	-27.2451	360.17
28.42	-27.9474	360.187
28.63	-27.5034	360.183
28.85	-27.0173	360.181
29.04	-26.3847	360.227
29.24	-26.3712	360.193
29.44	-27.1662	360.212
29.65	-27.1198	360.216
29.85	-26.5413	360.216
30.03	-27.4708	360.22
30.26	-26.4835	360.248
30.46	-26.9614	360.275
30.64	-26.0512	360.264
30.85	-26.699	360.159
31.07	-26.2005	360.224
31.25	-25.7769	360.187
31.44	-25.508	360.227
31.63	-26.4371	360.224
31.84	-26.5147	360.254
32.02	-25.5699	360.266
32.24	-25.9472	360.267
32.46	-26.3692	360.264
32.64	-25.943	360.233
32.83	-25.9516	360.199
33.04	-25.462	360.269
33.26	-26.2874	360.272
33.43	-25.8502	360.247
33.62	-25.6642	360.275
33.84	-25.6148	360.319
34.03	-25.9912	360.3
34.21	-25.9445	360.336
34.45	-25.4991	360.331
34.65	-26.1761	360.356
34.83	-25.1047	360.351
35.05	-25.7117	360.361
35.23	-25.6192	360.364
35.46	-24.4963	360.368
35.67	-25.6071	360.38
35.83	-24.8238	360.402
36.06	-25.5521	360.423
36.24	-24.8638	360.431
36.43	-25.3785	360.362
36.64	-25.2491	360.394
36.84	-25.4786	360.432
37.03	-25.2099	360.421
37.24	-25.3678	360.436
37.42	-24.5885	360.448
37.62	-24.8327	360.468
37.83	-24.1887	360.505
38.04	-25.0896	360.529
38.25	-23.9815	360.419
38.43	-25.3652	360.406
38.63	-24.5664	360.429
38.82	-24.7893	360.384
39.06	-24.4271	360.375
39.2	-24.3821	360.393
39.43	-24.5703	360.428
39.65	-24.3252	360.49
39.85	-24.1858	360.507
40.04	-23.9194	360.468
40.26	-24.4194	360.4
40.42	-23.6115	360.451
40.62	-23.8984	360.514
40.83	-23.9829	360.474
41.06	-23.9544	360.463
41.22	-24.7869	360.485
41.44	-23.7482	360.54
41.62	-23.2283	360.572
41.84	-23.6045	360.565
42.06	-24.0434	360.546
42.28	-23.9981	360.429
42.45	-23.5533	360.442
42.61	-23.4997	360.472
42.86	-23.5703	360.53
43.03	-23.6867	360.562
43.26	-23.1012	360.538
43.45	-22.9936	360.552
43.62	-23.168	360.411
43.85	-23.805	360.383
44.06	-23.8527	360.372
44.24	-23.0569	360.354
44.45	-23.5419	360.401
44.65	-22.0852	360.434
44.84	-22.3011	360.408
45.07	-22.6449	360.396
45.24	-22.8021	360.422
45.45	-23.0524	360.418
45.66	-22.703	360.436
45.81	-22.8282	360.45
46.08	-22.3212	360.454
46.26	-22.8418	360.465
46.43	-22.9609	360.426
46.63	-22.6421	360.386
46.83	-22.7253	360.4
47.06	-21.7489	360.407
47.23	-22.0141	360.374
47.46	-21.71	360.437
47.63	-22.0669	360.427
47.82	-21.8338	360.418
48.05	-21.0693	360.428
48.21	-21.1174	360.413
48.43	-22.1447	360.373
48.65	-21.4893	360.438
48.84	-20.8808	360.45
49.03	-21.1346	360.457
49.24	-21.7047	360.456
49.46	-20.8412	360.472
49.65	-21.2076	360.48
49.85	-21.2847	360.432
50.02	-20.2843	360.455
50.22	-20.8203	360.453
50.43	-20.7114	360.484
50.66	-20.6108	360.474
50.87	-20.6512	360.476
51.04	-20.4923	360.478
51.22	-20.458	360.49
51.45	-20.2119	360.506
51.63	-19.5508	360.565
51.84	-19.9809	360.566
52.06	-19.3944	360.557
52.24	-19.2922	360.588
52.42	-20.0712	360.558
52.67	-19.4259	360.57
52.82	-19.4815	360.613
53.05	-19.2473	360.509
53.23	-19.6393	360.559
53.47	-19.2022	360.566
53.62	-19.28	360.582
53.82	-19.061	360.598
54.04	-18.9962	360.612
54.22	-18.954	360.613
54.44	-18.8034	360.634
54.64	-18.8045	360.594
54.83	-18.9198	360.629
55.09	-18.7127	360.648
55.26	-18.7377	360.648
55.4	-18.0098	360.684
55.66	-17.6349	360.701
55.83	-18.4241	360.689
56.03	-18.4792	360.715
56.23	-17.237	360.766
56.44	-17.2435	360.709
56.66	-18.1091	360.751
56.82	-17.4252	360.723
57.05	-16.7067	360.776
57.24	-17.3738	360.703
57.44	-16.9234	360.753
57.64	-17.166	360.759
57.81	-16.8649	360.764
58.07	-16.9498	360.758
58.27	-16.2639	360.79
58.49	-16.4312	360.785
58.63	-16.0286	360.788
58.83	-16.0489	360.827
59	-15.9268	360.793
59.23	-16.3786	360.764
59.48	-15.7514	360.717
59.64	-15.7225	360.766
59.82	-15.5003	360.801
60.06	-15.7784	360.757
60.25	-15.2082	360.753
60.41	-14.9302	360.775
60.66	-15.0156	360.801
60.82	-14.9866	360.762
61.06	-15.4403	360.744
61.21	-14.6205	360.778
61.45	-14.6597	360.839
61.63	-14.5853	360.834
61.84	-14.251	360.875
62.01	-13.8634	360.873
62.22	-14.0593	360.842
62.46	-14.236	360.867
62.63	-13.1423	360.903
62.85	-14.1267	360.896
63.08	-13.5449	360.926
63.25	-13.4985	360.95
63.43	-12.6436	360.984
63.67	-13.4377	360.947
63.9	-14.0918	360.97
64.08	-12.4847	361.001
64.21	-13.085	361.003
64.42	-12.5753	361.065
64.64	-13.1353	361.066
64.87	-12.7411	361.067
65.02	-12.2148	361.126
65.23	-12.5381	361.095
65.43	-11.8447	361.119
65.67	-12.5783	361.128
65.84	-11.8428	361.154
66.01	-12.1489	361.156
66.23	-11.8463	361.205
66.47	-11.7742	361.232
66.63	-11.6218	361.247
66.87	-11.7421	361.305
67.1	-11.074	361.334
67.26	-11.3109	361.316
67.41	-11.0163	361.371
67.62	-10.0503	361.4
67.85	-10.7729	361.421
68.02	-10.4486	361.428
68.21	-10.9202	361.468
68.42	-10.0784	361.527
68.66	-10.3057	361.536
68.87	-10.5857	361.564
69.03	-10.3211	361.562
69.23	-10.2133	361.644
69.42	-9.51429	361.643
69.62	-9.03677	361.648
69.85	-9.82424	361.729
70.06	-9.76247	361.729
70.23	-9.83373	361.763
70.46	-9.65446	361.8
70.61	-10.0576	361.757
70.83	-9.15395	361.866
71.08	-9.35191	361.869
71.24	-8.89754	361.886
71.42	-8.26625	361.997
71.64	-8.50273	361.968
71.84	-8.82319	362.05
72.04	-8.71471	362.137
72.25	-7.97248	362.205
72.45	-7.91927	362.225
72.67	-8.30131	362.252
72.85	-8.64937	362.381
73.03	-8.33795	362.46
73.24	-7.91766	362.475
73.46	-7.6505	362.564
73.61	-8.43604	362.593
73.81	-8.45499	362.716
74.08	-7.86114	362.866
74.26	-7.35148	362.882
74.46	-6.92928	362.994
74.63	-6.95851	363.069
74.84	-7.65472	363.153
75.02	-7.70851	363.248
75.23	-7.08073	363.375
75.41	-6.78431	363.591
75.68	-7.03582	363.689
75.84	-7.84784	363.73
76.03	-7.37258	363.873
76.23	-6.94143	364.106
76.45	-7.32212	364.269
76.63	-6.07771	364.474
76.87	-7.19015	364.672
77.06	-6.5452	364.783
77.23	-6.27672	365.086
77.43	-6.90239	365.323
77.64	-7.18998	365.566
77.84	-6.42347	366.441
78.04	-6.49533	367.295
78.22	-6.30898	366.575
78.44	-6.53771	367.537
78.64	-5.58775	368.189
78.83	-6.97529	367.618
79.04	-5.70297	368.299
79.24	-6.36553	368.975
79.44	-5.78334	368.898
79.64	-5.73535	369.259
79.84	-4.84833	369.952
80.04	-6.03418	370.066
80.23	-5.23067	370.32
80.44	-5.20175	370.967
80.66	-5.08872	371.274
80.83	-4.66039	371.452
81.04	-5.87919	371.683
81.21	-5.32204	372.247
81.43	-5.19209	372.524
81.67	-5.08049	372.719
81.85	-5.60394	372.94
82.02	-5.77603	373.142
82.23	-5.92772	373.324
82.43	-5.4169	373.526
82.62	-4.55221	373.644
82.85	-4.26172	373.761
83	-5.03709	373.868
83.29	-4.3602	373.979
83.43	-4.38602	373.988
83.6	-4.98656	374.066
83.86	-4.27732	374.145
84.06	-4.85227	374.17
84.23	-4.78541	374.214
84.44	-4.16228	374.28
84.65	-4.21991	374.305
84.86	-4.21019	374.349
85.03	-5.09383	374.367
85.2	-5.20082	374.391
85.46	-4.67885	374.403
85.65	-4.81512	374.431
85.81	-4.97191	374.511
86.13	-4.62722	374.547
86.27	-4.69978	374.555
86.47	-5.08398	374.588
86.64	-4.62518	374.645
86.85	-4.88636	374.635
87.02	-5.34821	374.686
87.25	-4.36795	374.616
87.44	-4.69542	374.664
87.62	-4.85204	374.69
87.85	-4.84735	374.649
88.05	-4.77739	374.659
88.26	-4.68933	374.722
88.38	-4.8449	374.764
88.69	-4.65322	374.792
88.91	-4.8367	374.816
89.08	-4.43077	374.846
89.22	-4.69426	374.805
89.42	-4.34654	374.892
89.62	-4.80997	374.877
89.81	-4.76219	374.905
90.04	-4.96652	374.938
90.25	-4.61296	374.998
90.45	-4.67263	375.048
90.65	-3.91035	375.115
90.85	-4.76271	375.093
91.05	-4.8159	375.112
91.25	-4.16101	375.132
91.43	-4.79032	375.184
91.64	-3.85133	375.203
91.84	-4.19835	375.23
92.04	-4.46614	372.181
92.23	-4.56359	371.057
92.49	-4.30777	370.761
92.64	-4.34852	371.171
92.81	-4.2074	371.232
93.07	-4.45687	371.02
93.29	-4.43284	371.235
93.48	-4.18799	371.202
93.66	-4.18381	371.012
93.85	-5.42618	371.206
94.07	-4.55177	371.033
94.26	-3.25648	371.141
94.41	-4.54341	371.296
94.64	-4.20429	371.208
94.86	-4.2941	371.381
95.06	-3.54481	371.352
95.19	-4.30158	371.329
95.45	-4.73979	372.1
95.69	-4.83158	371.823
95.87	-3.69322	371.469
96.03	-4.41497	371.716
96.25	-4.99577	371.681
96.45	-4.27528	371.954
96.61	-4.20319	371.856
96.86	-4.207	372.039
97.04	-4.80337	372.039
97.22	-3.86381	372.06
97.45	-4.05435	372.166
97.65	-4.36581	372.117
97.85	-4.59635	372.33
98.04	-4.36633	372.348
98.23	-3.97592	372.399
98.45	-4.20785	372.514
98.65	-4.20224	372.602
98.9	-3.7592	372.546
99.04	-4.08471	372.689
99.24	-4.80607	374.744
99.45	-4.66041	375.514
99.63	-4.48556	374.981
99.85	-4.41052	375.111
100.06	-4.79362	374.889
