# Supplementary material for: A novel single alpha-helix DNA-binding domain in CAF-1 promotes gene silencing and DNA damage survival through tetrasome-length DNA selectivity and spacer function
Source: eLife journal article supplement (doi:10.7554/elife.83538), 2023-06-14
Supplement: fig2-data1 [file Melt KER40bpn4.xlsx]

## Sheet: Sheet1
Temperature [C]	CD [mdeg]	HT [V]
4.13	-30.3333	362.925
4.22	-29.5733	362.937
4.45	-30.2453	362.927
4.63	-30.3661	362.956
4.82	-31.2049	362.952
5.05	-30.39	362.94
5.26	-30.5625	362.978
5.43	-30.2991	362.971
5.64	-29.9969	362.901
5.85	-30.7889	362.952
6.03	-29.8086	362.935
6.25	-31.0685	362.892
6.45	-30.6215	362.913
6.66	-30.0519	362.91
6.84	-29.8405	362.869
7.06	-30.378	362.911
7.24	-29.8302	362.916
7.43	-29.953	362.935
7.63	-30.6606	362.941
7.8	-29.9548	362.936
8.05	-29.3775	362.968
8.23	-30.3107	362.963
8.46	-29.5341	362.996
8.64	-30.1369	362.997
8.83	-30.2028	362.989
9.05	-29.7431	363.028
9.24	-29.7591	362.963
9.43	-29.1348	362.978
9.64	-29.3169	363.017
9.85	-29.8002	363.013
10.04	-29.8433	363.012
10.23	-29.8791	363.025
10.45	-29.1077	363.074
10.66	-29.5695	363.051
10.84	-30.0039	363.062
11.04	-30.0592	363.069
11.23	-29.917	363.037
11.43	-29.4193	363.059
11.61	-29.8734	363.065
11.85	-28.9835	363.072
12.01	-29.0571	363.073
12.23	-29.1912	363.077
12.44	-29.6774	363.104
12.63	-29.5606	363.074
12.86	-29.4908	363.103
13.02	-29.4111	363.119
13.22	-29.2114	363.068
13.42	-29.7452	363.086
13.66	-28.7055	363.053
13.85	-28.6449	363.073
14.03	-28.4571	363.114
14.23	-29.2218	363.094
14.44	-29.1095	363.144
14.62	-29.0021	363.11
14.85	-29.4877	363.106
15.02	-28.7531	363.114
15.24	-28.951	363.125
15.42	-28.8622	363.126
15.64	-28.6387	363.111
15.82	-28.6729	363.132
16.05	-29.5805	363.138
16.22	-28.8255	363.142
16.43	-29.0179	363.184
16.63	-28.1337	363.151
16.84	-28.9537	363.173
17.02	-28.849	363.149
17.22	-28.8812	363.165
17.41	-28.8151	363.125
17.61	-29.0921	363.162
17.83	-27.9	363.194
18.04	-28.9402	363.191
18.22	-28.4446	363.187
18.43	-27.7158	363.21
18.61	-28.4662	363.193
18.81	-27.3079	363.207
19.04	-28.4764	363.191
19.24	-27.8178	363.212
19.43	-28.332	363.223
19.64	-28.2767	363.208
19.85	-28.3437	363.206
20.02	-28.8082	363.195
20.24	-28.4747	363.265
20.43	-27.8251	363.255
20.64	-27.7492	363.261
20.84	-27.6615	363.289
21.05	-27.8991	363.262
21.24	-28.3821	363.3
21.42	-27.316	363.272
21.65	-28.7293	363.297
21.85	-27.6895	363.339
22.04	-27.8062	363.251
22.23	-28.242	363.26
22.45	-28.3488	363.305
22.65	-28.3927	363.303
22.82	-27.2977	363.286
23.05	-27.5674	363.257
23.24	-28.3001	363.278
23.42	-28.0355	363.235
23.64	-27.5523	363.29
23.85	-27.8966	363.288
24.04	-27.5042	363.32
24.24	-27.293	363.324
24.42	-28.1964	363.333
24.65	-27.8266	363.28
24.82	-28.3145	363.277
25.04	-27.8613	363.309
25.23	-27.3019	363.319
25.43	-26.6137	363.313
25.62	-26.9944	363.333
25.83	-27.5456	363.337
26.03	-27.3494	363.321
26.24	-27.2662	363.343
26.42	-27.0003	363.289
26.66	-26.8404	363.321
26.83	-27.6312	363.271
27.03	-26.2503	363.29
27.24	-26.8164	363.318
27.45	-27.1791	363.316
27.63	-26.6565	363.316
27.83	-26.4268	363.332
28.05	-26.4272	363.326
28.24	-26.0996	363.313
28.44	-26.9199	363.32
28.63	-26.5694	363.331
28.83	-26.2683	363.34
29.05	-26.5754	363.328
29.24	-26.4015	363.386
29.44	-26.5917	363.399
29.65	-26.7269	363.399
29.86	-26.2087	363.403
30.06	-26.6273	363.388
30.23	-26.7605	363.4
30.45	-26.3096	363.387
30.65	-26.4295	363.361
30.82	-26.0803	363.333
31.04	-26.249	363.376
31.24	-26.0102	363.414
31.41	-26.2874	363.427
31.64	-26.4569	363.375
31.82	-26.2843	363.363
32.06	-26.0933	363.398
32.26	-26.002	363.398
32.44	-27.0824	363.4
32.63	-25.7273	363.416
32.85	-25.9629	363.422
33.04	-25.8309	363.431
33.25	-26.0207	363.438
33.47	-25.4739	363.45
33.63	-25.8654	363.435
33.82	-25.9825	363.452
34.05	-26.425	363.441
34.25	-25.0357	363.442
34.45	-25.7996	363.464
34.64	-25.3318	363.451
34.82	-25.5622	363.473
35.03	-25.5631	363.464
35.24	-25.2613	363.412
35.43	-25.5025	363.48
35.64	-25.4959	363.441
35.84	-25.3993	363.462
36.06	-25.0124	363.485
36.22	-24.9584	363.479
36.44	-25.2426	363.501
36.67	-24.9493	363.527
36.82	-24.8553	363.503
37.03	-24.7517	363.486
37.22	-24.4935	363.533
37.43	-24.7468	363.547
37.65	-24.4932	363.543
37.87	-25.0373	363.525
38.02	-25.0581	363.555
38.23	-24.901	363.512
38.45	-24.8517	363.557
38.65	-24.7957	363.539
38.82	-24.1502	363.536
39.01	-24.2315	363.494
39.25	-24.5443	363.524
39.43	-24.7077	363.563
39.62	-24.6384	363.561
39.85	-24.0648	363.572
40.07	-25.2156	363.561
40.22	-24.2717	363.563
40.42	-24.4595	363.589
40.62	-24.381	363.606
40.87	-24.2458	363.606
41.01	-23.7995	363.613
41.21	-24.3206	363.628
41.46	-24.3707	363.643
41.63	-23.6126	363.636
41.82	-24.2561	363.678
42.06	-23.87	363.63
42.25	-24.5014	363.616
42.46	-23.0245	363.636
42.68	-23.5986	363.615
42.82	-22.9245	363.636
43.05	-24.0581	363.657
43.22	-22.8974	363.656
43.47	-23.16	363.637
43.64	-23.2627	363.576
43.81	-22.8933	363.59
44.04	-23.3419	363.606
44.26	-23.1585	363.622
44.43	-22.4614	363.661
44.62	-22.8984	363.664
44.87	-22.8338	363.668
45.06	-22.8251	363.677
45.24	-22.3248	363.658
45.41	-22.7242	363.659
45.64	-23.7277	363.713
45.83	-21.9888	363.694
46.01	-22.582	363.693
46.21	-22.0259	363.709
46.43	-21.5919	363.739
46.62	-21.8683	363.715
46.84	-22.0883	363.718
47.04	-22.1829	363.732
47.24	-22.3435	363.735
47.43	-20.9043	363.662
47.65	-21.3125	363.715
47.85	-21.7794	363.74
48.05	-21.6628	363.722
48.22	-21.7624	363.752
48.43	-21.2417	363.809
48.67	-21.1427	363.798
48.81	-20.8125	363.797
49.05	-20.7669	363.811
49.25	-20.6762	363.818
49.49	-20.9981	363.822
49.63	-21.0084	363.849
49.83	-20.8751	363.79
50.04	-20.8299	363.796
50.26	-20.2028	363.832
50.44	-20.6954	363.819
50.66	-20.2876	363.842
50.82	-20.2084	363.861
51.04	-20.2589	363.827
51.25	-19.6971	363.834
51.46	-20.248	363.837
51.65	-19.5279	363.863
51.87	-20.6839	363.849
52.03	-20.5266	363.866
52.24	-19.9759	363.871
52.46	-20.0087	363.899
52.65	-19.2797	363.886
52.83	-19.7535	363.87
53.05	-20.0001	363.91
53.28	-19.0832	363.911
53.43	-19.5281	363.915
53.67	-19.9947	363.905
53.88	-19.5224	363.902
54.09	-18.2766	363.928
54.23	-18.9332	363.942
54.43	-18.7249	363.938
54.67	-18.5159	363.965
54.86	-18.1611	363.956
55.06	-18.6346	363.954
55.23	-18.1821	363.967
55.42	-18.6166	363.969
55.68	-18.1404	363.985
55.84	-17.9456	363.985
56.07	-18.0655	364.013
56.24	-17.9178	364.035
56.42	-18.2252	364.05
56.61	-17.7419	364.042
56.84	-17.7842	364.053
57.05	-18.0737	364.044
57.27	-16.9785	364.051
57.43	-17.5069	364.03
57.64	-17.2955	364.006
57.83	-16.7766	364.058
58.04	-17.0544	364.076
58.24	-16.746	364.102
58.43	-16.9978	364.038
58.65	-16.5142	364.057
58.85	-16.6261	364.084
59	-16.1931	364.073
59.22	-16.4974	364.103
59.44	-16.459	364.077
59.62	-16.0154	364.117
59.89	-16.017	364.093
60.05	-15.9752	364.091
60.21	-15.7085	364.082
60.43	-15.5528	364.113
60.68	-15.4622	364.1
60.84	-15.2482	364.142
61.03	-14.741	364.189
61.25	-14.6319	364.196
61.46	-15.3111	364.207
61.65	-14.7819	364.182
61.82	-15.2737	364.22
62.07	-14.0854	364.248
62.25	-14.5034	364.261
62.41	-14.2609	364.303
62.68	-13.822	364.284
62.81	-13.8007	364.304
63.03	-13.6296	364.344
63.23	-14.4682	364.324
63.41	-14.1735	364.362
63.66	-13.6855	364.346
63.84	-13.089	364.336
64.02	-13.184	364.382
64.22	-13.109	364.363
64.43	-12.9599	364.398
64.68	-12.7142	364.393
64.83	-12.3096	364.402
65.02	-13.001	364.418
65.23	-12.3508	364.479
65.46	-12.7525	364.452
65.68	-12.2265	364.499
65.87	-12.7792	364.511
66	-12.174	364.566
66.23	-12.303	364.605
66.46	-11.9741	364.542
66.61	-11.8769	364.589
66.85	-11.6156	364.598
67.08	-11.8998	364.588
67.26	-11.7707	364.606
67.4	-11.8289	364.625
67.65	-11.1896	364.664
67.81	-10.766	364.701
68.09	-10.7449	364.706
68.29	-10.682	364.75
68.43	-10.5588	364.748
68.62	-10.5799	364.812
68.83	-10.7536	364.843
69.01	-10.3817	364.867
69.29	-10.3767	364.931
69.5	-9.56935	364.938
69.66	-10.3686	364.97
69.81	-9.98452	365.001
70.07	-9.99086	365.073
70.24	-10.5173	365.101
70.44	-9.51095	365.169
70.69	-10.4287	365.184
70.89	-9.69444	365.206
71.05	-9.02767	365.237
71.22	-9.09464	365.242
71.44	-9.67099	365.3
71.62	-9.1505	365.298
71.83	-8.88752	365.343
72.02	-9.00128	365.406
72.22	-8.73678	365.512
72.44	-8.30844	365.55
72.64	-8.43416	365.594
72.82	-8.00051	365.645
73.04	-7.88013	365.699
73.24	-8.16	365.742
73.46	-7.80863	365.798
73.61	-7.92937	365.892
73.82	-6.97029	365.958
74.05	-8.83726	366
74.25	-7.18745	366.13
74.49	-7.8555	366.194
74.65	-7.88758	366.253
74.82	-8.54819	366.302
75.04	-7.55181	366.459
75.23	-7.46223	366.522
75.5	-7.88388	366.577
75.65	-7.36379	366.646
75.8	-6.97063	366.763
76.07	-6.86372	366.973
76.23	-7.59556	367.036
76.43	-7.58241	367.208
76.65	-7.70602	367.345
76.83	-7.02177	367.451
77.02	-6.83351	367.624
77.23	-6.60904	367.821
77.47	-6.51379	367.989
77.64	-6.44987	368.043
77.83	-6.66638	368.324
78.02	-7.0753	368.497
78.21	-7.15656	368.856
78.46	-6.33684	369.13
78.66	-5.86189	369.245
78.85	-5.22287	369.422
79.01	-6.67085	369.655
79.25	-5.78353	370.184
79.45	-6.47853	370.426
79.63	-5.91769	370.775
79.84	-6.51159	371.115
80.04	-5.55642	371.759
80.24	-5.97208	372.038
80.45	-5.87566	372.318
80.66	-5.91751	372.559
80.82	-5.55428	373.211
81.04	-5.14159	373.501
81.23	-5.58474	373.796
81.5	-5.18321	374.527
81.67	-5.61724	374.711
81.83	-5.37591	374.981
82.05	-6.18295	375.361
82.23	-4.99337	375.298
82.45	-5.28524	375.42
82.63	-4.64046	375.916
82.87	-4.25623	376.402
83.06	-4.71141	377.343
83.22	-5.98717	376.65
83.47	-5.84464	378.416
83.65	-5.18239	378.063
83.83	-3.9134	378.293
84.06	-4.0863	379.341
84.23	-5.16445	379.087
84.43	-4.14107	379.424
84.66	-5.25992	379.215
84.83	-4.71705	379.258
85.07	-5.32978	379.459
85.22	-4.52193	379.393
85.46	-4.37038	379.61
85.66	-4.48047	379.63
85.82	-4.48147	379.776
86.05	-4.50711	379.775
86.25	-4.71664	379.801
86.43	-4.88711	379.861
86.68	-3.41599	379.951
86.86	-4.13863	379.96
87.04	-5.00471	380.082
87.26	-4.59494	380.071
87.43	-4.14788	380.136
87.6	-5.35046	380.214
87.86	-4.83472	380.214
88.05	-4.22859	380.261
88.26	-3.49572	380.259
88.42	-4.21818	380.35
88.65	-4.44146	380.335
88.86	-4.07497	380.381
89.06	-4.53917	380.396
89.22	-4.79535	380.45
89.47	-4.45541	380.481
89.64	-4.45519	380.527
89.83	-3.81239	380.522
90.03	-5.28077	380.629
90.24	-5.10721	380.627
90.46	-4.68467	380.703
90.67	-4.86906	380.72
90.83	-4.20056	380.786
91.05	-4.44322	380.811
91.22	-3.8106	380.82
91.47	-4.40293	380.82
91.68	-4.708	380.827
91.81	-4.09039	380.919
92.09	-4.37335	380.249
92.32	-4.45322	379.972
92.51	-4.94792	379.981
92.64	-4.53834	380.08
92.93	-4.25242	381.995
93.1	-4.75432	381.651
93.32	-4.28799	381.065
93.53	-3.79242	381.269
93.68	-4.85683	381.269
93.84	-3.99349	381.458
94	-4.45683	381.327
94.26	-4.06445	381.433
94.46	-4.51354	381.378
94.62	-4.5934	381.429
94.86	-5.04914	381.465
95.03	-4.21833	381.53
95.23	-4.80477	381.525
95.48	-4.70215	381.533
95.67	-3.5643	381.553
95.85	-4.29464	381.27
96.07	-4.37279	380.842
96.22	-4.5259	379.758
96.42	-3.15817	380.956
96.63	-4.53251	380.486
96.88	-4.2612	380.801
97.09	-5.01431	380.399
97.25	-3.07982	380.533
97.45	-4.51847	380.741
97.65	-4.36778	380.796
97.82	-4.76595	380.885
98.08	-3.51363	380.854
98.23	-4.12818	380.835
98.44	-4.17801	377.925
98.65	-5.30106	379.695
98.84	-4.7428	378.93
99.13	-3.80912	379.65
99.28	-3.70892	379.922
99.46	-4.46546	380.093
99.64	-4.20693	380.096
99.85	-4.29686	380.802
100.08	-3.59413	380.676
