# Supplementary material for: A novel single alpha-helix DNA-binding domain in CAF-1 promotes gene silencing and DNA damage survival through tetrasome-length DNA selectivity and spacer function
Source: eLife journal article supplement (doi:10.7554/elife.83538), 2023-06-14
Supplement: fig2-data1 [file Melting KER Apon3.xlsx]

## Sheet: Sheet1
Temperature [C]	CD [mdeg]	HT [V]
4.14	-31.6848	321.155
4.22	-31.8264	321.165
4.43	-31.9712	321.146
4.66	-31.9617	321.175
4.85	-32.0935	321.186
5.04	-32.0171	321.145
5.25	-31.5684	321.231
5.45	-31.625	321.17
5.62	-31.3336	321.168
5.82	-31.5053	321.196
6.05	-31.6845	321.196
6.25	-31.6303	321.193
6.43	-31.0306	321.208
6.65	-31.5543	321.203
6.82	-31.0297	321.2
7.05	-31.0506	321.186
7.24	-30.5814	321.208
7.42	-30.7546	321.22
7.61	-31.0134	321.188
7.84	-30.683	321.229
8.01	-31.0909	321.216
8.23	-30.592	321.215
8.42	-30.768	321.189
8.64	-30.4667	321.208
8.85	-30.2388	321.177
9.02	-30.8142	321.186
9.2	-30.6662	321.227
9.42	-30.0214	321.229
9.62	-30.4379	321.221
9.82	-29.8059	321.236
10.05	-30.32	321.223
10.24	-30.4298	321.193
10.41	-30.0954	321.22
10.63	-29.8777	321.215
10.85	-29.5952	321.187
11.06	-29.9332	321.206
11.22	-29.7283	321.171
11.45	-29.9179	321.17
11.65	-29.6167	321.168
11.83	-29.5328	321.168
12.02	-29.5548	321.187
12.21	-29.5622	321.159
12.44	-29.3166	321.186
12.64	-29.061	321.199
12.84	-29.6401	321.16
13.02	-28.4768	321.174
13.22	-28.7284	321.181
13.43	-29.068	321.128
13.62	-29.0274	321.162
13.82	-28.9514	321.084
14.02	-28.5916	321.117
14.22	-28.3127	321.099
14.44	-28.5546	321.12
14.62	-28.6125	321.13
14.82	-28.7075	321.157
15.04	-28.028	321.104
15.21	-27.9025	321.148
15.42	-27.892	321.13
15.63	-28.4494	321.118
15.83	-28.3059	321.095
16.03	-27.6317	321.105
16.23	-27.6949	321.109
16.43	-27.8871	321.117
16.62	-28.3732	321.141
16.83	-27.8622	321.115
17.03	-27.558	321.086
17.23	-27.854	321.113
17.43	-27.0545	321.104
17.6	-27.3447	321.114
17.83	-27.0809	321.105
18.03	-27.1706	321.051
18.23	-26.6937	321.088
18.46	-27.0967	321.092
18.64	-26.2285	321.116
18.84	-26.5596	321.09
19.04	-26.4688	321.123
19.24	-26.7193	321.097
19.44	-26.6537	321.107
19.64	-26.6172	321.074
19.85	-26.1171	321.031
20.03	-25.9392	321.05
20.24	-26.1433	321.089
20.44	-25.9059	321.073
20.64	-25.8487	321.109
20.84	-26.2049	321.091
21.05	-25.5423	321.079
21.24	-26.1141	321.085
21.44	-25.9412	321.049
21.65	-25.5821	321.036
21.83	-25.5455	321.088
22.03	-25.2605	321.059
22.23	-25.6251	321.088
22.45	-25.6392	321.105
22.66	-25.087	321.102
22.83	-25.1035	321.108
23.03	-25.0654	321.112
23.22	-24.8921	320.95
23.43	-24.6773	320.97
23.64	-24.4663	321.03
23.85	-24.5929	320.926
24.03	-24.4805	320.967
24.22	-24.2846	321.006
24.44	-23.9652	320.989
24.63	-24.3327	320.991
24.84	-23.5382	320.995
25.05	-23.4994	321.018
25.23	-23.9723	320.987
25.41	-23.6527	320.977
25.66	-23.2859	321.014
25.85	-23.5334	320.987
26.04	-23.467	320.987
26.21	-23.4553	321.013
26.43	-23.4374	320.994
26.64	-23.3404	321.021
26.82	-22.9266	321.015
27.02	-23.1723	321.012
27.22	-22.5005	321.003
27.43	-22.8152	321.011
27.67	-22.3187	321.015
27.82	-22.183	321.007
28.02	-22.3407	321.021
28.2	-22.6285	320.969
28.44	-22.2573	320.984
28.64	-22.0736	320.983
28.85	-22.0815	321.018
29.04	-22.1187	320.996
29.25	-21.4703	320.989
29.44	-21.8578	320.976
29.62	-21.599	320.971
29.82	-21.1861	320.97
30.06	-21.7932	321.004
30.26	-21.3552	320.988
30.44	-21.5123	321.009
30.63	-21.4436	321.004
30.86	-20.9969	320.994
31.05	-21.3963	320.981
31.22	-20.7355	320.977
31.45	-21.031	320.988
31.61	-20.8188	320.988
31.83	-20.6558	321.026
32.06	-20.2764	320.984
32.23	-20.3042	320.999
32.44	-20.157	320.972
32.64	-20.3303	320.978
32.85	-20.1997	320.993
33.01	-19.8855	320.995
33.25	-19.8914	320.985
33.46	-19.3041	320.964
33.62	-19.1816	320.959
33.84	-19.8036	320.995
34.02	-19.5588	321.001
34.24	-19.0882	320.993
34.45	-19.3448	320.979
34.63	-18.7876	321.031
34.82	-18.9895	321.015
35.05	-18.5413	321.019
35.22	-18.779	320.945
35.42	-18.4408	320.991
35.64	-18.496	320.963
35.86	-18.5136	320.961
36.03	-18.3039	320.993
36.24	-17.8487	320.99
36.48	-18.0053	321.014
36.63	-18.0882	321.02
36.82	-18.2912	321.003
37.04	-17.8711	320.96
37.25	-17.9031	320.993
37.41	-17.2945	321.03
37.64	-17.1855	320.994
37.83	-17.408	321.025
38.05	-17.1988	320.973
38.26	-17.1124	320.99
38.42	-17.4933	320.983
38.62	-17.1175	320.994
38.85	-17.0793	321.023
39.04	-16.5833	321.007
39.24	-16.8706	321.01
39.42	-16.6791	320.981
39.63	-16.4471	320.934
39.83	-16.6897	320.967
40.03	-16.5704	320.925
40.24	-16.3364	320.987
40.44	-16.2397	320.976
40.65	-15.9191	320.96
40.86	-16.3659	320.923
41.05	-15.9803	320.907
41.23	-15.8067	320.956
41.45	-15.6817	320.95
41.63	-15.1612	320.956
41.84	-15.4917	320.949
42.05	-15.1016	320.931
42.24	-15.0319	320.959
42.42	-15.5122	320.893
42.64	-14.7867	320.847
42.85	-15.0117	320.872
43.03	-14.288	320.869
43.25	-14.5128	320.881
43.42	-14.4683	320.863
43.64	-14.4652	320.881
43.83	-14.5756	320.796
44.02	-14.6299	320.795
44.28	-14.4291	320.816
44.44	-14.2292	320.799
44.63	-14.1152	320.804
44.81	-13.8218	320.836
45.03	-13.9821	320.854
45.23	-13.9737	320.826
45.45	-13.3777	320.822
45.63	-13.446	320.856
45.83	-13.7069	320.84
46.03	-13.4509	320.858
46.26	-13.0356	320.858
46.43	-13.3036	320.849
46.61	-13.1971	320.868
46.85	-13.2181	320.866
47.07	-12.5866	320.865
47.25	-12.8865	320.9
47.42	-13.0423	320.901
47.62	-12.5233	320.903
47.84	-12.4201	320.906
48.04	-12.2506	320.915
48.24	-12.3441	320.875
48.41	-12.2901	320.904
48.66	-12.5512	320.872
48.86	-12.3817	320.915
49.02	-12.147	320.918
49.29	-12.3813	320.95
49.47	-12.1757	320.938
49.6	-12.0953	320.926
49.87	-11.7723	320.972
50.06	-11.9267	320.938
50.23	-11.8511	320.924
50.44	-11.7578	320.915
50.63	-11.3472	320.924
50.83	-11.6374	320.923
51.03	-11.9716	320.92
51.3	-10.9745	320.915
51.45	-11.277	320.931
51.66	-11.0297	320.916
51.9	-11.3529	320.939
52.08	-11.1411	320.956
52.21	-11.1778	320.967
52.47	-11.417	320.93
52.65	-11.1238	320.891
52.86	-11.2074	320.9
53.05	-10.8233	320.897
53.25	-10.7896	320.935
53.46	-10.7338	320.916
53.67	-10.4547	320.93
53.83	-10.2671	320.888
54.04	-10.4452	320.934
54.24	-10.0909	320.931
54.41	-10.4892	320.918
54.67	-10.0526	320.954
54.84	-10.3902	320.949
55.04	-9.88172	320.946
55.24	-9.64857	320.984
55.42	-9.91852	320.93
55.64	-10.0648	320.913
55.87	-10.4059	320.932
56.1	-10.1101	320.919
56.21	-9.87733	320.943
56.43	-9.48965	320.91
56.64	-10.1465	320.913
56.85	-9.51719	320.894
57.04	-9.09972	320.894
57.24	-9.5522	320.918
57.45	-9.47361	320.937
57.63	-9.48185	320.929
57.81	-9.14775	320.878
58.05	-9.22631	320.887
58.26	-9.63979	320.927
58.45	-9.19627	320.929
58.62	-9.09936	320.949
58.84	-9.56057	320.954
59.09	-9.1796	320.952
59.24	-8.47766	320.978
59.42	-8.70606	320.99
59.64	-8.52454	320.96
59.86	-9.10456	321.003
60.05	-8.3288	321.004
60.24	-8.62623	320.993
60.43	-8.87963	321.009
60.61	-8.48666	320.971
60.83	-8.30482	320.968
61.05	-9.17154	320.973
61.22	-8.59261	320.997
61.45	-8.31108	320.993
61.63	-8.6079	320.982
61.84	-8.47231	320.991
62.04	-8.43926	320.937
62.24	-8.25758	320.979
62.42	-8.60868	320.984
62.64	-8.46627	320.979
62.83	-8.27888	320.99
63.04	-8.15232	320.943
63.23	-7.8885	320.998
63.46	-8.09385	321.013
63.64	-8.22799	320.979
63.85	-7.98134	320.997
64.07	-7.99257	321.003
64.24	-7.94802	320.969
64.45	-7.7505	320.972
64.61	-7.84239	320.973
64.82	-7.59885	321.007
65.04	-8.20431	320.991
65.23	-7.8164	321.012
65.48	-8.08403	320.999
65.63	-8.21604	320.991
65.85	-7.77625	320.916
66.08	-7.11086	320.964
66.29	-8.16363	320.961
66.42	-7.60301	320.962
66.61	-7.57247	320.998
66.85	-7.48474	321.002
67.04	-7.19707	321.025
67.24	-7.53379	321.025
67.4	-7.36993	321.024
67.62	-7.5709	321.018
67.83	-7.38569	321.053
68.02	-7.15128	321.06
68.21	-7.26643	321.066
68.44	-7.50656	321.057
68.61	-7.32686	321.071
68.81	-7.29039	321.076
69.04	-7.07494	321.061
69.26	-6.77302	321.083
69.43	-6.96795	321.096
69.64	-7.09267	321.113
69.82	-7.50108	321.102
70.04	-6.60602	321.138
70.3	-7.06283	321.141
70.43	-6.74549	321.113
70.65	-6.88802	321.114
70.82	-7.55281	321.086
71.05	-6.89621	321.105
71.25	-6.8855	321.138
71.41	-6.93391	321.132
71.67	-6.92418	321.151
71.88	-7.06847	321.146
72.02	-6.92165	321.159
72.25	-6.78197	321.152
72.45	-7.11777	321.17
72.63	-6.82202	321.158
72.82	-6.72361	321.127
73.02	-6.91333	321.151
73.26	-6.22991	321.123
73.45	-6.94648	321.113
73.66	-6.79232	321.116
73.86	-6.06017	321.12
74.07	-6.49515	321.128
74.29	-6.69436	321.169
74.47	-6.61112	321.176
74.63	-6.57312	321.149
74.83	-6.39175	321.204
75.05	-6.30093	321.174
75.26	-5.83918	321.178
75.43	-6.67522	321.184
75.65	-6.39893	321.226
75.83	-6.61233	321.198
76.03	-6.21679	321.237
76.25	-6.64528	321.249
76.44	-6.25843	321.239
76.59	-6.24877	321.235
76.83	-6.33274	321.253
77.07	-6.6182	321.273
77.23	-5.94714	321.277
77.43	-6.50386	321.268
77.65	-6.14867	321.271
77.87	-6.30282	321.284
78	-6.30702	321.244
78.27	-6.16298	321.272
78.47	-5.94984	321.286
78.64	-5.91195	321.303
78.88	-6.32803	321.27
79.07	-6.13671	321.26
79.25	-6.32509	321.258
79.4	-5.57822	321.286
79.64	-6.14447	321.281
79.85	-6.04124	321.237
80.04	-6.00267	321.295
80.23	-5.62179	321.282
80.43	-5.86073	321.29
80.62	-5.66546	321.288
80.87	-6.19276	321.281
81.05	-5.48905	321.236
81.25	-6.06272	321.227
81.4	-5.80911	321.283
81.65	-6.06852	321.253
81.86	-6.01344	321.274
82.04	-6.07995	321.267
82.25	-5.4846	321.259
82.42	-5.60667	321.185
82.61	-5.46951	321.137
82.84	-5.8834	321.17
83.04	-5.45154	321.21
83.24	-5.04714	321.224
83.41	-5.6736	321.248
83.68	-5.47229	321.198
83.86	-5.84373	321.189
84.05	-5.3071	321.234
84.22	-5.55109	321.243
84.43	-5.32232	321.2
84.67	-5.90769	321.239
84.86	-5.75926	321.237
85.08	-5.54828	321.227
85.3	-5.59772	321.218
85.44	-5.34833	321.265
85.62	-5.90317	321.261
85.83	-5.99965	321.302
86.02	-5.77003	321.374
86.24	-5.33485	321.337
86.48	-5.85427	321.346
86.73	-5.50181	321.37
86.87	-5.42359	321.318
87.13	-6.04673	321.391
87.29	-4.99485	321.352
87.52	-5.43402	321.362
87.66	-5.82384	321.343
87.9	-5.42088	321.358
88.07	-5.59259	321.416
88.22	-5.78845	321.423
88.47	-5.56772	321.336
88.64	-5.45099	321.418
88.86	-5.0561	321.387
89.06	-5.09137	321.423
89.24	-5.40331	321.401
89.4	-5.41984	321.37
89.64	-5.42233	321.433
89.85	-5.24699	321.423
90.08	-5.56044	321.432
90.2	-5.58758	321.399
90.5	-5.13113	321.385
90.67	-4.9398	321.389
90.9	-5.28742	321.415
91.02	-4.98924	321.427
91.24	-5.68874	321.411
91.46	-5.11004	321.411
91.64	-5.42559	321.407
91.81	-5.16762	321.358
92.09	-4.9395	321.397
92.24	-5.40163	321.435
92.42	-5.13641	321.408
92.67	-5.20292	321.404
92.84	-5.28032	321.386
93.02	-5.15725	321.43
93.2	-5.18825	321.466
93.47	-5.50247	321.402
93.65	-5.5751	321.439
93.86	-5.25421	321.437
94.09	-5.14658	321.457
94.23	-4.96925	321.485
94.43	-5.31867	321.507
94.62	-5.16631	321.482
94.84	-5.0038	321.532
95.03	-4.91444	321.54
95.22	-5.42555	321.523
95.41	-4.7334	321.571
95.65	-5.56048	321.6
95.94	-5.39033	321.579
96.11	-4.9391	321.589
96.19	-5.05107	321.537
96.49	-5.71982	321.597
96.64	-5.5397	321.639
96.86	-5.05108	321.62
97.09	-4.92597	321.635
97.26	-4.972	321.659
97.44	-5.20549	321.674
97.63	-5.34344	321.656
97.87	-4.96412	321.646
98.02	-4.77012	321.627
98.3	-4.65969	321.692
98.46	-5.16037	321.694
98.63	-4.95643	321.688
98.82	-4.91215	321.61
99.04	-4.82778	321.687
99.24	-4.84141	321.708
99.48	-5.13008	321.716
99.71	-5.09758	321.708
99.84	-4.94086	321.729
100.05	-4.53486	321.735
