# Supplementary material for: A novel single alpha-helix DNA-binding domain in CAF-1 promotes gene silencing and DNA damage survival through tetrasome-length DNA selectivity and spacer function
Source: eLife journal article supplement (doi:10.7554/elife.83538), 2023-06-14
Supplement: fig2-data1 [file Melting KER40bpn3.xlsx]

## Sheet: Sheet1
Temperature [C]	CD [mdeg]	HT [V]
4.13	-20.952	455.719
4.23	-19.1919	455.69
4.44	-19.7116	455.687
4.65	-20.1476	455.703
4.89	-19.0996	455.674
5.06	-18.8449	455.63
5.23	-19.6598	455.642
5.42	-17.5245	455.657
5.63	-16.9429	455.642
5.83	-19.3018	455.618
6.05	-18.3566	455.612
6.23	-19.5407	455.63
6.45	-18.0919	455.57
6.64	-18.0828	455.5
6.84	-19.201	455.492
7.02	-19.6635	455.481
7.23	-19.2194	455.452
7.43	-19.6883	455.427
7.62	-19.4275	455.361
7.83	-17.8588	455.341
8.01	-18.0318	455.338
8.21	-21.1715	455.253
8.43	-19.3994	455.215
8.64	-19.5163	455.186
8.84	-17.61	455.035
9.06	-18.7122	455.061
9.26	-18.2414	455.014
9.41	-18.3424	454.988
9.65	-18.2177	454.934
9.84	-17.1596	454.889
10.05	-18.2874	454.89
10.21	-19.8999	454.837
10.42	-19.5111	454.764
10.63	-18.4968	454.735
10.85	-18.774	454.648
11.04	-18.4017	454.666
11.22	-20.0033	454.651
11.43	-18.686	454.576
11.65	-20.0236	454.512
11.85	-18.6716	454.461
12.04	-17.591	454.411
12.22	-19.3055	454.412
12.43	-19.4775	454.328
12.63	-20.1521	454.311
12.85	-17.0593	454.291
13.02	-19.0979	454.215
13.26	-18.4842	454.177
13.45	-19.2361	454.128
13.63	-18.605	454.096
13.85	-18.3089	453.999
14.02	-19.4416	453.932
14.24	-18.5254	453.854
14.44	-17.4016	453.835
14.62	-18.7528	453.794
14.82	-18.4355	453.734
15.05	-18.3413	453.745
15.23	-18.9223	453.676
15.44	-17.908	453.618
15.63	-17.4143	453.605
15.83	-18.357	453.574
16.02	-16.9626	453.524
16.23	-18.7219	453.512
16.43	-17.6814	453.48
16.63	-18.7175	453.425
16.82	-19.0899	453.373
17.01	-17.9608	453.283
17.23	-16.7727	453.266
17.44	-18.1169	453.197
17.63	-19.7183	453.229
17.83	-17.8914	453.118
18.05	-17.3924	453.086
18.23	-19.2878	453.053
18.43	-18.2358	452.904
18.64	-18.5797	452.867
18.84	-18.7746	452.836
19.04	-17.8031	452.812
19.24	-18.2172	452.638
19.44	-17.8625	452.616
19.62	-16.7904	452.637
19.84	-18.5489	452.577
20.04	-18.0936	452.504
20.22	-16.2469	452.497
20.44	-19.0051	452.526
20.6	-18.4651	452.432
20.85	-17.8186	452.331
21.03	-16.7664	452.361
21.21	-18.6772	452.349
21.44	-17.8204	452.374
21.63	-16.5338	452.293
21.84	-17.5506	452.273
22.05	-17.463	452.236
22.23	-17.3817	452.237
22.44	-17.5582	452.214
22.64	-18.7303	452.149
22.84	-18.2257	452.131
23.04	-17.962	452.095
23.25	-17.1059	452.071
23.46	-17.1904	452.02
23.66	-18.62	451.984
23.82	-17.8003	451.992
24.05	-18.1363	451.855
24.26	-16.5071	451.851
24.42	-16.4616	451.863
24.63	-18.3395	451.812
24.81	-18.7705	451.827
25.03	-17.0553	451.761
25.27	-17.4774	451.717
25.44	-18.2124	451.75
25.64	-16.7826	451.735
25.84	-16.9496	451.68
26.01	-16.47	451.76
26.26	-18.457	451.709
26.46	-17.7856	451.684
26.65	-18.6578	451.658
26.82	-18.1733	451.608
27.03	-17.3385	451.665
27.25	-18.9245	451.626
27.46	-17.5759	451.642
27.65	-17.2	451.62
27.85	-17.1473	451.637
28.05	-16.7717	451.645
28.21	-16.0828	451.657
28.43	-17.3125	451.637
28.61	-17.476	451.663
28.86	-17.6148	451.562
29.06	-17.5977	451.645
29.24	-18.5559	451.627
29.45	-16.4514	451.639
29.64	-18.6319	451.627
29.8	-17.6305	451.637
30.04	-16.5335	451.696
30.25	-18.105	451.695
30.45	-18.4559	451.729
30.67	-18.2783	451.738
30.85	-16.5216	451.643
31.04	-16.0396	451.658
31.23	-16.2782	451.721
31.47	-17.7292	451.713
31.64	-18.2997	451.713
31.82	-18.9215	451.649
32.04	-16.4159	451.617
32.21	-16.6401	451.514
32.44	-18.4986	451.401
32.64	-17.3477	451.366
32.84	-16.7524	451.235
33.05	-16.9275	451.071
33.23	-17.7157	450.907
33.44	-16.45	450.797
33.62	-17.142	450.629
33.84	-17.4122	450.486
34.01	-16.8358	450.431
34.23	-17.2444	450.347
34.43	-15.9536	450.356
34.69	-15.8863	450.402
34.83	-16.1358	450.503
35.04	-17.5165	450.723
35.23	-16.9691	451.034
35.44	-16.8284	451.373
35.63	-17.3982	451.725
35.81	-16.2423	451.976
36.04	-17.2413	452.214
36.23	-16.5591	452.369
36.47	-16.1848	452.379
36.63	-16.0136	452.368
36.83	-14.4638	452.32
37.03	-14.0537	452.307
37.22	-17.2007	452.285
37.45	-16.3868	452.388
37.66	-14.5402	452.493
37.83	-16.3032	452.552
38.01	-14.8279	452.679
38.26	-15.9252	452.829
38.41	-16.8801	452.935
38.62	-15.8796	453.026
38.84	-16.8333	453.055
39.04	-14.7376	452.935
39.26	-16.7004	452.888
39.44	-16.3478	452.778
39.63	-16.3372	452.629
39.82	-17.2945	452.445
40.06	-15.759	452.508
40.23	-16.8469	452.459
40.46	-15.5909	452.583
40.62	-14.6766	452.724
40.82	-15.0606	452.824
41.08	-15.9642	452.963
41.25	-16.1437	452.941
41.42	-14.2808	453.026
41.68	-14.0003	453.097
41.85	-14.9414	453.135
42.03	-15.1598	453.162
42.27	-15.6079	453.252
42.44	-13.0081	453.361
42.65	-14.7395	453.44
42.86	-14.0719	453.425
43.03	-15.1575	453.37
43.26	-14.5379	453.304
43.44	-14.9568	453.233
43.65	-14.4352	453.128
43.83	-14.0455	453.118
44.04	-12.9587	453.192
44.25	-13.5523	453.272
44.45	-14.339	453.315
44.69	-14.599	453.346
44.85	-14.396	453.346
45.03	-14.1152	453.328
45.25	-15.886	453.425
45.46	-13.9295	453.518
45.65	-13.9627	453.516
45.82	-14.7321	453.572
46.02	-13.4834	453.542
46.25	-13.182	453.482
46.45	-14.4332	453.446
46.62	-13.6409	453.436
46.83	-13.1422	453.431
47.07	-12.205	453.506
47.23	-13.9233	453.45
47.42	-13.7773	453.508
47.65	-13.2552	453.602
47.85	-12.6349	453.639
48.07	-12.9425	453.663
48.25	-13.5661	453.626
48.42	-12.3178	453.655
48.65	-13.2783	453.626
48.87	-14.1885	453.573
49.01	-12.878	453.615
49.25	-12.7153	453.572
49.49	-12.0732	453.622
49.61	-11.3031	453.601
49.82	-12.0831	453.662
50.05	-11.1688	453.728
50.27	-11.8863	453.821
50.44	-13.2604	453.806
50.61	-12.0889	453.831
50.81	-13.0031	453.785
51.06	-12.4218	453.786
51.25	-11.6573	453.736
51.43	-12.1191	453.801
51.66	-11.4433	453.814
51.84	-11.3646	453.81
52.06	-11.2142	453.858
52.26	-11.3445	453.887
52.43	-10.5528	453.926
52.62	-12.1522	453.952
52.88	-12.0684	453.917
53.02	-11.9463	453.952
53.25	-12.689	453.962
53.43	-11.5386	454.035
53.68	-9.96388	453.994
53.9	-11.0527	453.985
54.07	-11.5085	454.024
54.2	-11.9087	454.063
54.44	-11.5453	454.13
54.64	-11.1394	454.109
54.84	-10.1213	454.151
55.06	-10.4753	454.213
55.22	-9.96597	454.233
55.43	-11.0363	454.161
55.63	-10.5291	454.249
55.84	-11.0675	454.213
56.03	-10.5465	454.251
56.26	-10.0738	454.3
56.43	-9.39232	454.313
56.67	-9.52551	454.372
56.83	-10.2108	454.262
57.03	-11.2219	454.335
57.26	-8.24646	454.344
57.44	-9.39298	454.381
57.65	-10.3058	454.406
57.86	-9.59892	454.432
58.04	-7.99252	454.445
58.25	-10.1299	454.463
58.44	-8.4261	454.519
58.61	-8.95267	454.514
58.82	-9.55318	454.484
59.05	-8.2889	454.464
59.25	-7.70531	454.513
59.43	-7.37849	454.527
59.64	-6.63968	454.576
59.82	-8.41237	454.629
60.02	-8.6443	454.652
60.29	-7.17563	454.678
60.45	-9.7503	454.712
60.63	-8.09714	454.745
60.81	-7.78543	454.737
61.06	-7.68147	454.668
61.2	-6.23331	454.709
61.48	-5.96112	454.786
61.6	-6.40492	454.814
61.84	-7.0586	454.878
62.09	-7.92292	454.904
62.24	-7.42147	454.905
62.47	-5.90198	454.982
62.7	-6.13572	454.876
62.86	-5.75456	454.824
63.09	-6.61201	454.989
63.27	-6.47036	455.015
63.46	-4.49527	455.065
63.64	-5.56241	455.111
63.85	-5.13414	455.198
64.04	-6.18878	455.198
64.21	-5.74743	455.166
64.43	-4.23222	455.269
64.65	-6.4898	455.294
64.86	-6.2317	455.343
65.09	-4.35353	455.407
65.21	-4.12653	455.426
65.44	-5.9676	455.496
65.67	-5.41532	455.572
65.82	-5.28812	455.602
66.03	-4.66889	455.65
66.24	-4.30721	455.708
66.42	-5.14806	455.798
66.64	-5.05838	455.864
66.83	-4.03518	455.876
67.05	-6.14163	455.902
67.21	-3.30341	455.959
67.43	-4.2621	456.011
67.64	-3.74032	456.071
67.86	-4.54878	456.116
68.05	-2.91496	456.176
68.21	-3.77753	456.22
68.43	-2.76446	456.388
68.7	-4.46356	456.423
68.88	-5.35555	456.435
69.01	-3.43321	456.423
69.26	-3.29886	456.631
69.48	-3.13019	456.715
69.64	-4.1279	456.687
69.84	-3.25587	456.786
70.06	-4.31498	456.815
70.28	-3.17206	456.847
70.41	-1.59381	456.911
70.61	-3.52763	457.145
70.87	-1.67987	457.272
71.04	-2.41482	457.256
71.21	-3.20448	457.385
71.43	-2.23025	457.637
71.68	-1.73046	457.511
71.85	-2.96988	457.483
72.02	-1.98727	457.416
72.24	-2.3203	457.47
72.45	-1.44269	457.507
72.6	-2.65048	457.707
72.82	-0.885968	457.94
73.03	-1.68477	458.125
73.24	-1.08837	458.508
73.48	-0.399997	458.611
73.7	-3.09385	458.632
73.87	-1.90856	458.774
74.09	-1.76616	459.244
74.27	-2.00943	459.282
74.44	-0.210052	459.419
74.63	-0.851605	459.686
74.84	-0.839491	459.959
75.08	-2.40645	460.182
75.27	-0.387419	460.266
75.41	0.351601	460.326
75.66	-0.877805	460.749
75.83	-0.614775	460.931
76.03	-2.47109	461.215
76.22	-1.07147	461.614
76.43	-2.94997	461.985
76.66	-1.00403	462.183
76.82	-0.348329	462.582
77.05	-0.838683	462.98
77.24	-0.316968	463.387
77.44	-0.190938	463.699
77.62	-0.0314163	464.268
77.84	0.186105	464.844
78.03	1.15849	465.46
78.24	-0.424649	465.831
78.41	-2.98736	466.286
78.64	0.00747986	465.633
78.82	-1.07357	466.746
79.02	-0.730516	467.451
79.25	1.04771	468.367
79.46	-1.80601	469.207
79.64	0.697804	470.17
79.82	-0.699019	471.322
80.04	-0.286827	472.11
80.24	-1.45726	473.375
80.43	-0.349141	474.723
80.66	-0.105971	475.903
80.89	-2.29208	476.465
81.07	-1.06417	477.149
81.25	-0.00638275	480.317
81.44	-0.803787	480.956
81.65	-1.17634	482.386
81.84	-1.88735	480.781
82.01	0.581168	483.832
82.21	-2.23288	485.382
82.46	-2.17619	486.627
82.61	-1.54407	488.986
82.85	0.656705	489.362
83.09	-0.579218	491.561
83.22	-0.44212	494.116
83.44	-0.0716934	497.236
83.66	0.957738	497.734
83.86	-1.23045	497.901
84.02	-0.963309	499.222
84.25	-2.37518	499.554
84.44	-0.640836	500.805
84.62	-2.74561	500.762
84.81	0.700587	501.898
85.05	-1.01382	502.248
85.27	-2.42052	502.985
85.46	0.586902	503.013
85.64	-0.325685	502.609
85.84	1.53442	502.56
86.07	-0.660513	500.89
86.26	0.0563538	502.369
86.43	-2.63392	503.057
86.64	-2.0577	502.795
86.8	-0.967047	503.476
87.06	1.22124	502.977
87.22	-0.266412	503.543
87.47	-2.19028	503.383
87.67	-0.478316	503.779
87.83	-0.559282	503.675
88.07	0.781004	503.483
88.25	-1.58678	503.792
88.45	0.786961	503.041
88.61	-0.962993	503.833
88.84	1.08775	503.79
89.05	-2.69426	500.524
89.26	-0.620108	502.202
89.42	0.52588	501.29
89.68	-1.55757	502.76
89.8	1.57141	502.501
90.09	-1.10088	503.169
90.28	-0.431917	502.9
90.42	0.179497	503.252
90.62	1.28024	504.619
90.86	-1.59213	508.545
91.03	-1.36392	506.968
91.25	-0.73506	506.683
91.48	0.729776	507.97
91.68	-1.53287	507.562
91.88	-0.662189	506.048
92.02	-0.502676	506.978
92.28	-2.23502	507.157
92.41	0.97317	506.644
92.66	-2.0256	507.092
92.86	-0.371191	506.525
93.06	-0.463397	507.093
93.24	-1.8397	507.212
93.45	-2.43392	507.123
93.67	-3.96622	506.859
93.87	-0.181732	507.177
94.03	-2.22807	505.198
94.29	-3.26658	506.001
94.43	-2.83173	505.337
94.65	-2.08148	505.895
94.85	-2.77271	505.604
95.04	-2.32255	505.679
95.28	-0.836697	505.8
95.47	-2.31511	505.553
95.65	-2.41524	505.034
95.83	-1.33539	505.413
96.06	-0.40309	505.644
96.23	-0.692975	505.647
96.44	0.729185	505.456
96.65	-2.6471	505.023
96.82	-2.16733	503.611
97.06	-0.0087616	502.949
97.3	-2.38825	504.527
97.43	-1.09657	503.568
97.68	3.29362	507.058
97.89	-1.42741	508.793
98.04	-2.34436	507.177
98.22	-1.73611	510.997
98.51	-0.289763	508.716
98.66	-0.600742	510.007
98.86	0.145306	509.372
99	-2.53138	508.87
99.3	-0.0467789	508.578
99.51	-1.88475	508.597
99.63	0.442508	508.838
99.81	0.207686	509.053
100.09	-1.34842	508.747
