# Supplementary material for: A novel single alpha-helix DNA-binding domain in CAF-1 promotes gene silencing and DNA damage survival through tetrasome-length DNA selectivity and spacer function
Source: eLife journal article supplement (doi:10.7554/elife.83538), 2023-06-14
Supplement: fig3-data1 [file 200323 Kd KER truncations Fraction bound calculation.xlsx]

## Sheet: Sheet1
N, K136 - K172+Y											C2, R179 - R225+Y
Gel1. 19.11.12											Gel1. 19.11.12
Grid 1 -Free DNA					Grid 2 - Bound						Grid 3 -Free DNA						Grid 4 -Bound
Lane	Volume	Minus Background			Lane	Volume	Minus Background	Fraction Bound			Lane	Volume	Minus Background				Lane	Volume	Minus Background	Fraction Bound		Kds					FINAL Kd	Error (+/-)	Units
1	4315310	3.33323e+06			1	1543270	0	0			1	2590569	2.49631e+06				1	189352	5058	0.0020221			N	C2
2	4458424	3.47634e+06			2	1686424	143154	0.0395508			2	2703154	2.60889e+06				2	191681	7387	0.00282348		Gel1	N/A	N/A		N	1	1	uM
3	4726834	3.74475e+06			3	1820743	277473	0.0689849			3	2710652	2.61639e+06				3	184294	0	0		Gel2	2.216e-06	1.111e-06		C2	0.9	0.2	uM
4	4629072	3.64699e+06			4	1945648	402378	0.0993681			4	2764881	2.67062e+06				4	192111	7817	0.00291849		Gel3	6.059e-07	8.558e-07
5	4784886	3.80281e+06			5	2103306	560036	0.128365			5	2523171	2.42891e+06				5	215706	31412	0.0127674
6	4589954	3.60787e+06			6	2251647	708377	0.164119			6	2299273	2.20501e+06				6	267795	83501	0.036487		STD	1.13851e-06	1.80454e-07
7	4717206	3.73513e+06			7	2720630	1177360	0.239667			7	1914053	1.81979e+06				7	538541	354247	0.162944
8	4370089	3.38801e+06			8	3119741	1576471	0.31755			8	2108704	2.01444e+06				8	317061	132767	0.0618324
9	3974090	2.99201e+06			9	3725815	2182545	0.421784			9	1502824	1.40856e+06				9	664810	480516	0.254365
10	3999356	3.01728e+06			10	3880841	2337571	0.436534			10	1423560	1.3293e+06				10	785883	601589	0.311561
Area	1680	Background	982081		Area	2640					Area	1248	Background	94261.8			Area	2440
Gel2. 19.11.19											Gel2. 19.11.19
Grid 1 -Free DNA					Grid 2 - Bound						Grid 3 -Free DNA						Grid 4 -Bound
Lane	Volume	Minus Background			Lane	Volume	Minus Background	Fraction Bound			Lane	Volume	Minus Background				Lane	Volume	Minus Background	Fraction Bound
1	2656427	2.59473e+06			1	149759	0	0			1	3224703	3.10314e+06				1	340369	0	0
2	1275915	1.21422e+06			2	704343	554584	0.313536			2	1987917	1.86636e+06				2	1330747	990378	0.346682
3	1168054	1.10636e+06			3	990144	840385	0.431688			3	1603837	1.48228e+06				3	1485646	1145277	0.435872
4	891255	829559			4	962853	813094	0.494988			4	1210948	1.08939e+06				4	1735786	1395417	0.56158
5	684232	622536			5	1037657	887898	0.587843			5	1145726	1.02417e+06				5	1551251	1210882	0.54177
6	705326	643630			6	1230770	1081011	0.626804			6	1014402	892842				6	1620620	1280251	0.589138
7	470320	408624			7	1100031	950272	0.699297			7	823737	702177				7	1893300	1552931	0.688628
8	364249	302553			8	1283750	1133991	0.789389			8	629179	507619				8	1593233	1252864	0.711659
9	282429	220733			9	1413274	1263515	0.851283			9	554545	432985				9	1823106	1482737	0.773984
10	157947	96250.5			10	1367988	1218229	0.926777			10	385486	263926				10	1527330	1186961	0.818094
Area	1170	Background	61696.5		Area	2840					Area	1200	Background	121560			Area	3360
Gel3. 19.11.25											Gel3. 19.11.25
Grid 1 -Free DNA					Grid 2 - Bound						Grid 3 -Free DNA						Grid 4 -Bound
Lane	Volume	Minus Background			Lane	Volume	Minus Background	Fraction Bound			Lane	Volume	Minus Background				Lane	Volume	Minus Background	Fraction Bound
1	3726278	3.28163e+06			1	1739927	0	0			1	3543758	3.4514e+06				1	348425	0	0
2	2361906	1.91726e+06			2	3094109	1354182	0.413941			2	2119997	2.02764e+06				2	1494899	1146474	0.361195
3	1958888	1.51424e+06			3	3581428	1841501	0.548761			3	1706838	1.61448e+06				3	1820361	1471936	0.476907
4	1580138	1.13549e+06			4	3980290	2240363	0.663644			4	1249920	1.15757e+06				4	2152354	1803929	0.609128
5	1482627	1.03798e+06			5	3943418	2203491	0.679781			5	1115521	1.02317e+06				5	2273894	1925469	0.653003
6	1181071	736423			6	4103986	2364059	0.762481			6	867348	774994				6	2212591	1864166	0.706348
7	942135	497487			7	4258665	2518738	0.835063			7	544250	451896				7	2327047	1978622	0.814074
8	787625	342977			8	4341153	2601226	0.883508			8	349406	257052				8	2334414	1985989	0.8854
9	685972	241324			9	4369073	2629146	0.915929			9	256334	163980				9	2441002	2092577	0.927332
10	577105	132457			10	4106554	2366627	0.946998			10	214749	122395				10	2349302	2000877	0.942355
Area	920	Background	444648		Area	3600					Area	880	Background	92353.6			Area	3320
