# Supplementary material for: A novel single alpha-helix DNA-binding domain in CAF-1 promotes gene silencing and DNA damage survival through tetrasome-length DNA selectivity and spacer function
Source: eLife journal article supplement (doi:10.7554/elife.83538), 2023-06-14
Supplement: fig3-data1 [file 220207 Cy5 40bp EMSA with yKER middle_A_Table.xlsx]

## Sheet: 220207 Cy5 40bp EMSA with yKER 
	Name	Volume	Background	Background Level	Background Type	Median Intensity	Average Intensity	Mode Intensity	Std Dev	Variance	Min Intensity	Max Intensity	Percent	Area > Background	Centre X	Centre Y	Width	Height	Area	Comment
	1	995720	0	0	None	46	46.34	44	7.66	58.71	78	12	2.15	21488	558	1055	136	158	21488
	2	784387	0	0	None	46	46.08	44	7.36	54.17	74	12	1.7	17024	696	1052	112	152	17024
	3	1884887	0	0	None	49	75.93	47	94.73	8972.93	844	19	4.08	24824	826	1083	116	214	24824
	4	2201381	0	0	None	51	87.86	48	115.76	13400.1	969	18	4.76	25056	958	1084	116	216	25056
	5	2739574	0	0	None	54	103.65	47	127.16	16169.5	839	17	5.93	26432	1091	1088	118	224	26432
	6	2814304	0	0	None	56	112.32	49	130.43	17011.7	757	22	6.09	25056	1226	1084	116	216	25056
	7	3259810	0	0	None	61	127.66	50	136.09	18520.4	813	20	7.05	25536	1357	1088	114	224	25536
	8	3603840	0	0	None	67	135.5	49	140.19	19653	893	18	7.8	26596	1487	1087	122	218	26596
	9	3892013	0	0	None	99	159.4	54	154.38	23831.9	966	23	8.42	24416	1621	1087	112	218	24416
	10	4060528	0	0	None	85	147.51	53	138.26	19116.2	832	20	8.79	27528	1755	1089	124	222	27528
	11 cell(1, 1)	3364949	0	0	None	201	439.52	54	459.57	211208	2131	27	7.28	7656	563	1221	132	59	7656
	11 cell(2, 1)	3261059	0	0	None	176	422.75	54	475.34	225952	2173	29	7.06	7714	695	1222	133	59	7714
	11 cell(3, 1)	2683936	0	0	None	184	350.57	63	342.76	117485	1582	25	5.81	7656	828	1223	132	59	7656
	11 cell(4, 1)	2410004	0	0	None	165	312.42	58	319.91	102345	1431	29	5.22	7714	960	1224	133	59	7714
	11 cell(5, 1)	1912153	0	0	None	144	249.76	59	246.87	60947.2	1048	25	4.14	7656	1093	1225	132	59	7656
	11 cell(6, 1)	1914702	0	0	None	143	250.09	52	249.51	62255.1	1006	33	4.14	7656	1225	1226	132	59	7656
	11 cell(7, 1)	1591104	0	0	None	130	206.26	49	194.86	37970.6	829	27	3.44	7714	1357	1227	133	59	7714
	11 cell(8, 1)	1136100	0	0	None	104	148.39	101	119.94	14386.2	560	24	2.46	7656	1490	1228	132	59	7656
	11 cell(9, 1)	860601	0	0	None	89	111.56	89	73.57	5412.74	362	18	1.86	7714	1622	1229	133	59	7714
	11 cell(10, 1)	839533	0	0	None	89	109.66	46	67.95	4616.56	361	18	1.82	7656	1755	1230	132	59	7656

## Sheet: Sheet1
BOUND
	Name	Volume	Area		less background	Fract Bound		Concentration
	1	995720	21488		5652.57	0.00187305		0
	2	784387	17024		0	0		1.2e-08
	3	1884887	24824		741112	0.241224		3.7e-08
	4	2201381	25056		1.04692e+06	0.337552		4.9e-08
	5	2739574	26432		1.52171e+06	0.493884		6.4e-08
	6	2814304	25056		1.65984e+06	0.515192		8.4e-08
	7	3259810	25536		2.08323e+06	0.627685		1.1e-07
	8	3603840	26596		2.37842e+06	0.752244		2.5e-07
	9	3892013	24416		2.76704e+06	0.845616		4.4e-07
	10	4060528	27528		2.79217e+06	0.851544		7.6e-07
FREE
	11 cell(1, 1)	3364949	7656		3.0122e+06
	11 cell(2, 1)	3261059	7714		2.90563e+06
	11 cell(3, 1)	2683936	7656		2.33118e+06
	11 cell(4, 1)	2410004	7714		2.05458e+06
	11 cell(5, 1)	1912153	7656		1.5594e+06
	11 cell(6, 1)	1914702	7656		1.56195e+06
	11 cell(7, 1)	1591104	7714		1.23568e+06
	11 cell(8, 1)	1136100	7656		783347
	11 cell(9, 1)	860601	7714		505176
	11 cell(10, 1)	839533	7656		486780
