# Supplementary material for: A novel single alpha-helix DNA-binding domain in CAF-1 promotes gene silencing and DNA damage survival through tetrasome-length DNA selectivity and spacer function
Source: eLife journal article supplement (doi:10.7554/elife.83538), 2023-06-14
Supplement: fig3-data1 [file 220208 Cy5 40bp EMSA with yKER middleA_n1_Table.xlsx]

## Sheet: 220208 Cy5 40bp EMSA with yKER 
	Name	Volume	Background	Background Level	Background Type	Median Intensity	Average Intensity	Mode Intensity	Std Dev	Variance	Min Intensity	Max Intensity	Percent	Area > Background	Centre X	Centre Y	Width	Height	Area	Comment
	2	1425038	0	0	None	47	47.58	46	7.87	61.87	80	20	2.83	29952	491	1139	128	234	29952
	3	1468122	0	0	None	47	48.31	46	10.84	117.46	232	15	2.92	30392	630	1151	116	262	30392
	4	1902748	0	0	None	48	56.63	45	36.12	1304.57	362	18	3.78	33600	760	1158	120	280	33600
	5	2571056	0	0	None	51	75.81	47	76.88	5910.04	773	15	5.11	33916	891	1157	122	278	33916
	6	3079040	0	0	None	56	94.13	48	86.28	7443.69	528	18	6.11	32712	1024	1159	116	282	32712
	7	3355745	0	0	None	58	102.06	50	92.35	8527.69	530	19	6.66	32880	1156	1157	120	274	32880
	8	3380898	0	0	None	62	113	48	101.45	10291.8	568	20	6.71	29920	1285	1156	110	272	29920
	9	4092433	0	0	None	76	121.54	49	108.23	11713	680	21	8.13	33672	1416	1158	122	276	33672
	10	4147675	0	0	None	86	132.14	51	113.21	12817.1	655	22	8.24	31388	1546	1155	118	266	31388
	11	4444688	0	0	None	93	134.75	50	110.18	12138.8	690	20	8.83	32984	1683	1153	124	266	32984
	12 cell(1, 1)	3375215	0	0	None	166	376.03	62	428.27	183418	2126	29	6.7	8976	497	1328	132	69	8976
	12 cell(2, 1)	3566660	0	0	None	163	397.36	59	468.88	219851	2195	33	7.08	8976	629	1329	132	69	8976
	12 cell(3, 1)	3080886	0	0	None	150	345.86	58	402.87	162305	1888	32	6.12	8908	760	1330	131	68	8908
	12 cell(4, 1)	2504261	0	0	None	133	279	68	314.62	98985.6	1356	30	4.97	8976	892	1330	132	69	8976
	12 cell(5, 1)	1887459	0	0	None	115	210.28	55	221.97	49271.5	945	26	3.75	8976	1024	1331	132	69	8976
	12 cell(6, 1)	1637353	0	0	None	112	182.41	55	176.46	31137.5	807	30	3.25	8976	1156	1332	132	69	8976
	12 cell(7, 1)	1576672	0	0	None	112	175.65	112	164.28	26987.7	751	25	3.13	8976	1288	1333	132	69	8976
	12 cell(8, 1)	1117876	0	0	None	89	125.49	90	97.59	9523.38	476	25	2.22	8908	1419	1334	131	68	8908
	12 cell(9, 1)	919882	0	0	None	77	102.48	79	71.47	5107.76	379	24	1.83	8976	1551	1334	132	69	8976
	12 cell(10, 1)	821326	0	0	None	72	91.5	66	52.71	2777.86	280	25	1.63	8976	1683	1335	132	69	8976

## Sheet: Fract Bound
BOUND
	Name	Volume	Area		less background	Fract Bound		Concentration
	2	1425038	29952		0	0		0
	3	1468122	30392		22149.9	0.00700559		1.2e-08
	4	1902748	33600		304148	0.10271		3.7e-08
	5	2571056	33916		957421	0.315499		4.9e-08
	6	3079040	32712		1.52269e+06	0.51044		6.4e-08
	7	3355745	32880		1.7914e+06	0.596796		8.4e-08
	8	3380898	29920		1.95738e+06	0.629991		1.1e-07
	9	4092433	33672		2.49041e+06	0.782049		2.5e-07
	10	4147675	31388		2.65432e+06	0.843405		4.4e-07
	11	4444688	32984		2.8754e+06	0.879415		7.6e-07
FREE
	12 cell(1, 1)	3375215	8976		2.94816e+06
	12 cell(2, 1)	3566660	8976		3.13961e+06
	12 cell(3, 1)	3080886	8908		2.65707e+06
	12 cell(4, 1)	2504261	8976		2.07721e+06
	12 cell(5, 1)	1887459	8976		1.4604e+06
	12 cell(6, 1)	1637353	8976		1.2103e+06
	12 cell(7, 1)	1576672	8976		1.14962e+06
	12 cell(8, 1)	1117876	8908		694057
	12 cell(9, 1)	919882	8976		492827
	12 cell(10, 1)	821326	8976		394271
