# Supplementary material for: A novel single alpha-helix DNA-binding domain in CAF-1 promotes gene silencing and DNA damage survival through tetrasome-length DNA selectivity and spacer function
Source: eLife journal article supplement (doi:10.7554/elife.83538), 2023-06-14
Supplement: fig3-data1 [file 220208 Cy5 40bp EMSA with yKER middleA_n2_Table.xlsx]

## Sheet: 220208 Cy5 40bp EMSA with yKER 
	Name	Volume	Background	Background Level	Background Type	Median Intensity	Average Intensity	Mode Intensity	Std Dev	Variance	Min Intensity	Max Intensity	Percent	Area > Background	Centre X	Centre Y	Width	Height	Area	Comment
	1	1439142	0	0	None	47	47.14	47	7.8	60.82	131	19	3.1	30528	484	1146	144	212	30528
	2	1204665	0	0	None	47	47.59	46	8.8	77.37	169	17	2.59	25312	622	1170	112	226	25312
	3	1906943	0	0	None	50	61.51	47	46.34	2147.01	446	18	4.1	31000	756	1186	124	250	31000
	4	2495083	0	0	None	55	85.68	46	79.54	6326.45	599	19	5.37	29120	882	1187	112	260	29120
	5	3163067	0	0	None	60	100.99	50	89.57	8022.68	552	22	6.81	31320	1013	1190	116	270	31320
	6	3330342	0	0	None	70	114.37	53	96.43	9299.39	593	23	7.17	29120	1139	1187	112	260	29120
	7	3449010	0	0	None	66	113.08	51	97.15	9438.32	531	17	7.42	30500	1266	1184	122	250	30500
	8	3748230	0	0	None	89	131.24	53	105.29	11086.3	610	23	8.07	28560	1399	1180	120	238	28560
	9	4107325	0	0	None	100	142.62	52	115.86	13423.2	694	20	8.84	28800	1531	1181	120	240	28800
	10	4184760	0	0	None	104	137.37	52	99.53	9906.78	612	22	9.01	30464	1671	1184	128	238	30464
	11 cell(1, 1)	2901539	0	0	None	300.5	442.98	57	391.61	153356	1635	29	6.24	6550	485	1351	131	50	6550
	11 cell(2, 1)	2994216	0	0	None	259.5	457.13	64	438.51	192290	1849	35	6.44	6550	616	1351	131	50	6550
	11 cell(3, 1)	2674365	0	0	None	228	405.21	61	393.68	154982	1726	35	5.76	6600	748	1351	132	50	6600
	11 cell(4, 1)	2153488	0	0	None	175	328.78	60	339.95	115563	1417	34	4.63	6550	879	1351	131	50	6550
	11 cell(5, 1)	1654538	0	0	None	143	252.6	66	242.3	58709.2	995	36	3.56	6550	1010	1351	131	50	6550
	11 cell(6, 1)	1385005	0	0	None	126	211.45	55	187.61	35196.4	773	35	2.98	6550	1141	1351	131	50	6550
	11 cell(7, 1)	1305112	0	0	None	122	199.25	56	167.59	28085	685	34	2.81	6550	1272	1351	131	50	6550
	11 cell(8, 1)	893239	0	0	None	95	135.34	81	91.95	8454.07	405	28	1.92	6600	1404	1351	132	50	6600
	11 cell(9, 1)	783989	0	0	None	92	119.69	77	68.67	4715.15	308	29	1.69	6550	1535	1351	131	50	6550
	11 cell(10, 1)	695480	0	0	None	86	106.18	58	56.22	3160.7	286	23	1.5	6550	1666	1350	131	51	6550

## Sheet: Fract Bound
BOUND
	Name	Volume	Area		less background	Fract Bound		Concentration
	1	1439142	30528		0	0		0
	2	1204665	25312		11414.1	0.00423239		1.2e-08
	3	1906943	31000		445550	0.158628		3.7e-08
	4	2495083	29120		1.12232e+06	0.378263		4.9e-08
	5	3163067	31320		1.68659e+06	0.556199		6.4e-08
	6	3330342	29120		1.95758e+06	0.645255		8.4e-08
	7	3449010	30500		2.01119e+06	0.668719		1.1e-07
	8	3748230	28560		2.40186e+06	0.804923		2.5e-07
	9	4107325	28800		2.74964e+06	0.852641		4.4e-07
	10	4184760	30464		2.74864e+06	0.876663		7.6e-07
FREE
	11 cell(1, 1)	2901539	6550		2.59276e+06
	11 cell(2, 1)	2994216	6550		2.68544e+06
	11 cell(3, 1)	2674365	6600		2.36323e+06
	11 cell(4, 1)	2153488	6550		1.84471e+06
	11 cell(5, 1)	1654538	6550		1.34576e+06
	11 cell(6, 1)	1385005	6550		1.07623e+06
	11 cell(7, 1)	1305112	6550		996334
	11 cell(8, 1)	893239	6600		582104
	11 cell(9, 1)	783989	6550		475211
	11 cell(10, 1)	695480	6550		386702
