# Supplementary material for: A novel single alpha-helix DNA-binding domain in CAF-1 promotes gene silencing and DNA damage survival through tetrasome-length DNA selectivity and spacer function
Source: eLife journal article supplement (doi:10.7554/elife.83538), 2023-06-14
Supplement: fig4-data1 [file 211210 Cy5 ladder EMSA with yCAF1 _Table.xlsx]

## Sheet: 211210 Cy5 ladder EMSA with yCA
	Name	Volume	Background	Background Level	Background Type	Median Intensity	Average Intensity	Mode Intensity	Std Dev	Variance	Min Intensity	Max Intensity	Percent	Area > Background	Centre X	Centre Y	Width	Height	Area	Comment
	2 cell(1, 1)	3323200	0	0	None	454.5	516.67	75	370.72	137431	1466	54	3.56	6432	580	1435	134	49	6432
	2 cell(2, 1)	1142820	0	0	None	168	177.68	118	75.24	5661.23	347	58	1.22	6432	714	1436	134	48	6432
	2 cell(3, 1)	915385	0	0	None	142	143.39	104	48.45	2346.98	288	57	0.98	6384	847	1436	133	49	6384
	2 cell(4, 1)	775892	0	0	None	115	120.63	113	32.63	1064.94	228	44	0.83	6432	981	1437	134	48	6432
	2 cell(5, 1)	780956	0	0	None	114	121.42	108	32.44	1052.4	221	55	0.84	6432	1115	1437	134	49	6432
	2 cell(6, 1)	770223	0	0	None	114	119.75	110	28.64	820.21	203	53	0.82	6432	1249	1438	134	49	6432
	2 cell(7, 1)	732888	0	0	None	107	113.94	96	28.38	805.57	192	52	0.78	6432	1383	1439	134	48	6432
	2 cell(8, 1)	681444	0	0	None	103	106.74	95	22.22	493.91	180	55	0.73	6384	1516	1439	133	49	6384
	2 cell(9, 1)	690614	0	0	None	104	107.37	102	20.9	436.69	174	57	0.74	6432	1650	1440	134	48	6432
	2 cell(10, 1)	721432	0	0	None	112	112.16	109	20.94	438.63	169	51	0.77	6432	1784	1440	134	49	6432
	3 cell(1, 1)	1801357	0	0	None	512	505.43	78	291.19	84790.4	1085	52	1.93	3564	592	1477	132	27	3564
	3 cell(2, 1)	1074792	0	0	None	306	301.57	88	136.28	18571.6	557	62	1.15	3564	724	1477	132	27	3564
	3 cell(3, 1)	814728	0	0	None	237	228.6	84	89.41	7993.46	416	58	0.87	3564	856	1478	132	28	3564
	3 cell(4, 1)	552216	0	0	None	156	154.94	137	43.49	1891.36	257	60	0.59	3564	988	1478	132	27	3564
	3 cell(5, 1)	471434	0	0	None	125	131.28	114	33.22	1103.43	216	60	0.5	3591	1120	1478	133	27	3591
	3 cell(6, 1)	443773	0	0	None	119	124.52	109	30.18	910.56	220	57	0.48	3564	1253	1478	132	27	3564
	3 cell(7, 1)	403629	0	0	None	108	113.25	99	26.25	689.02	178	54	0.43	3564	1385	1478	132	27	3564
	3 cell(8, 1)	386812	0	0	None	106	108.53	102	21.91	480.21	172	55	0.41	3564	1517	1479	132	28	3564
	3 cell(9, 1)	395350	0	0	None	108	110.93	103	20.63	425.46	175	57	0.42	3564	1649	1479	132	27	3564
	3 cell(10, 1)	412653	0	0	None	118	115.78	125	20.41	416.74	169	61	0.44	3564	1781	1479	132	27	3564
	4 cell(1, 1)	1953716	0	0	None	254	291.25	89	163.64	26778.3	730	64	2.09	6708	594	1520	129	52	6708
	4 cell(2, 1)	1871211	0	0	None	243	278.95	95	150.51	22652	680	65	2	6708	723	1520	129	52	6708
	4 cell(3, 1)	1776084	0	0	None	231	262.73	150	131.99	17421.7	688	60	1.9	6760	853	1520	130	52	6760
	4 cell(4, 1)	1457667	0	0	None	206	217.3	142	83.26	6932.74	433	74	1.56	6708	982	1520	129	52	6708
	4 cell(5, 1)	1273988	0	0	None	179	189.92	132	73.24	5363.54	368	71	1.36	6708	1111	1520	129	52	6708
	4 cell(6, 1)	1246791	0	0	None	175	185.87	130	70.67	4993.84	345	60	1.33	6708	1240	1520	129	52	6708
	4 cell(7, 1)	974693	0	0	None	142	145.3	126	41.48	1720.45	260	62	1.04	6708	1369	1520	129	52	6708
	4 cell(8, 1)	856949	0	0	None	127	126.77	139	28.92	836.36	203	61	0.92	6760	1499	1520	130	52	6760
	4 cell(9, 1)	856705	0	0	None	127	127.71	118	29.49	869.64	201	59	0.92	6708	1628	1520	129	52	6708
	4 cell(10, 1)	854839	0	0	None	131	127.44	135	26.54	704.23	194	54	0.92	6708	1757	1520	129	52	6708
	5 cell(1, 1)	3447338	0	0	None	207	331.47	89	292.61	85619.4	1220	56	3.69	10400	593	1590	130	80	10400
	5 cell(2, 1)	3481416	0	0	None	224	334.75	94	272.92	74483.6	1099	67	3.73	10400	723	1590	130	80	10400
	5 cell(3, 1)	3321667	0	0	None	249	319.39	99	226.93	51497.4	925	61	3.56	10400	853	1590	130	80	10400
	5 cell(4, 1)	3109581	0	0	None	231	299	100	207.74	43157.1	839	63	3.33	10400	983	1590	130	80	10400
	5 cell(5, 1)	2853778	0	0	None	187	274.4	101	219.6	48225.1	931	62	3.06	10400	1113	1590	130	80	10400
	5 cell(6, 1)	2789130	0	0	None	186	268.19	94	206.07	42463.5	865	54	2.99	10400	1243	1590	130	80	10400
	5 cell(7, 1)	2359811	0	0	None	155	226.9	103	167.62	28095.7	745	62	2.53	10400	1373	1590	130	80	10400
	5 cell(8, 1)	1971077	0	0	None	135	189.53	123	126.78	16074	629	56	2.11	10400	1503	1590	130	80	10400
	5 cell(9, 1)	2039228	0	0	None	137	196.08	135	139.09	19345.8	681	59	2.18	10400	1633	1590	130	80	10400
	5 cell(10, 1)	1822471	0	0	None	133	175.24	105	111.18	12361.9	578	58	1.95	10400	1763	1590	130	80	10400
	6 cell(1, 1)	3609331	0	0	None	135	231.37	93	231.46	53574.8	1231	44	3.86	15600	601	1704	130	120	15600
	6 cell(2, 1)	3773605	0	0	None	151	240.05	96	206.71	42729.7	979	61	4.04	15720	731	1704	131	120	15720
	6 cell(3, 1)	3464967	0	0	None	144	222.11	95	171.67	29469	794	45	3.71	15600	862	1704	130	120	15600
	6 cell(4, 1)	3489524	0	0	None	153	221.98	97	165.33	27335.5	782	56	3.74	15720	992	1704	131	120	15720
	6 cell(5, 1)	3522716	0	0	None	136	225.82	100	200.4	40160	950	55	3.77	15600	1123	1704	130	120	15600
	6 cell(6, 1)	3384498	0	0	None	138	216.96	94	181.7	33016.2	861	50	3.62	15600	1253	1704	130	120	15600
	6 cell(7, 1)	3333256	0	0	None	134	212.04	89	176.18	31038.5	827	53	3.57	15720	1383	1704	131	120	15720
	6 cell(8, 1)	3438169	0	0	None	137	220.4	88	189.44	35888.7	920	52	3.68	15600	1514	1704	130	120	15600
	6 cell(9, 1)	3586224	0	0	None	144	228.13	97	193.25	37344.6	937	48	3.84	15720	1644	1704	131	120	15720
	6 cell(10, 1)	3671602	0	0	None	136	235.36	99	219.71	48271	1120	54	3.93	15600	1775	1704	130	120	15600
	7	520967	0	0	None	73	72.68	72	8.34	69.51	99	35	0.56	7168	574	1248	128	56	7168

## Sheet: Fraction Bound
		Volume	Area		Minus Backg.	Normalization	Bound apparent
50bp	2 cell(1, 1)	3323200	6432		2.85573e+06	1	0
	2 cell(2, 1)	1142820	6432		675345	0.236488	0.763512
	2 cell(3, 1)	915385	6384		451399	0.158068	0.841932
	2 cell(4, 1)	775892	6432		308417	0.108	0.892
	2 cell(5, 1)	780956	6432		313481	0.109773	0.890227
	2 cell(6, 1)	770223	6432		302748	0.106014	0.893986
	2 cell(7, 1)	732888	6432		265413	0.0929407	0.907059
	2 cell(8, 1)	681444	6384		217458	0.076148	0.923852
	2 cell(9, 1)	690614	6432		223139	0.0781375	0.921863
	2 cell(10, 1)	721432	6432		253957	0.0889291	0.911071
40bp	3 cell(1, 1)	1801357	3564		1.54233e+06	1	0
	3 cell(2, 1)	1074792	3564		815762	0.528916	0.471084
	3 cell(3, 1)	814728	3564		555698	0.360298	0.639702
	3 cell(4, 1)	552216	3564		293186	0.190093	0.809907
	3 cell(5, 1)	471434	3591		210442	0.136444	0.863556
	3 cell(6, 1)	443773	3564		184743	0.119782	0.880218
	3 cell(7, 1)	403629	3564		144599	0.0937538	0.906246
	3 cell(8, 1)	386812	3564		127782	0.0828502	0.91715
	3 cell(9, 1)	395350	3564		136320	0.088386	0.911614
	3 cell(10, 1)	412653	3564		153623	0.0996047	0.900395
30 bp	4 cell(1, 1)	1953716	6708		1.46618e+06	1	0
	4 cell(2, 1)	1871211	6708		1.38368e+06	0.943728	0.056272
	4 cell(3, 1)	1776084	6760		1.28477e+06	0.87627	0.12373
	4 cell(4, 1)	1457667	6708		970133	0.661673	0.338327
	4 cell(5, 1)	1273988	6708		786454	0.536396	0.463604
	4 cell(6, 1)	1246791	6708		759257	0.517846	0.482154
	4 cell(7, 1)	974693	6708		487159	0.332263	0.667737
	4 cell(8, 1)	856949	6760		365635	0.249379	0.750621
	4 cell(9, 1)	856705	6708		369171	0.25179	0.74821
	4 cell(10, 1)	854839	6708		367305	0.250518	0.749482
20 bp	5 cell(1, 1)	3447338	10400		2.69147e+06	0.987497	0.0125032
	5 cell(2, 1)	3481416	10400		2.72555e+06	1	0
	5 cell(3, 1)	3321667	10400		2.5658e+06	0.941388	0.0586117
	5 cell(4, 1)	3109581	10400		2.35371e+06	0.863574	0.136426
	5 cell(5, 1)	2853778	10400		2.09791e+06	0.76972	0.23028
	5 cell(6, 1)	2789130	10400		2.03326e+06	0.746001	0.253999
	5 cell(7, 1)	2359811	10400		1.60394e+06	0.588485	0.411515
	5 cell(8, 1)	1971077	10400		1.21521e+06	0.445859	0.554141
	5 cell(9, 1)	2039228	10400		1.28336e+06	0.470863	0.529137
	5 cell(10, 1)	1822471	10400		1.0666e+06	0.391335	0.608665
10 bp	6 cell(1, 1)	3609331	15600		2.47553e+06	0.940879	0.0591211
	6 cell(2, 1)	3773605	15720		2.63108e+06	1	0
	6 cell(3, 1)	3464967	15600		2.33117e+06	0.88601	0.11399
	6 cell(4, 1)	3489524	15720		2.347e+06	0.892029	0.107971
	6 cell(5, 1)	3522716	15600		2.38892e+06	0.907959	0.092041
	6 cell(6, 1)	3384498	15600		2.2507e+06	0.855426	0.144574
	6 cell(7, 1)	3333256	15720		2.19073e+06	0.832636	0.167364
	6 cell(8, 1)	3438169	15600		2.30437e+06	0.875825	0.124175
	6 cell(9, 1)	3586224	15720		2.4437e+06	0.928782	0.0712182
	6 cell(10, 1)	3671602	15600		2.5378e+06	0.964546	0.0354536
Background	7	520967	7168		0
