# Supplementary material for: A novel single alpha-helix DNA-binding domain in CAF-1 promotes gene silencing and DNA damage survival through tetrasome-length DNA selectivity and spacer function
Source: eLife journal article supplement (doi:10.7554/elife.83538), 2023-06-14
Supplement: fig4-data1 [file 211214 Cy5 ladder EMSA with yKER_Table.xlsx]

## Sheet: 211214 Cy5 ladder EMSA with yKE
	Name	Volume	Background	Background Level	Background Type	Median Intensity	Average Intensity	Mode Intensity	Std Dev	Variance	Min Intensity	Max Intensity	Percent	Area > Background	Centre X	Centre Y	Width	Height	Area	Comment
	1 cell(1, 1)	3221025	0	0	None	349	387.14	117	248.16	61584.9	1167	59	4.06	8320	542	1410	130	64	8320
	1 cell(2, 1)	1107444	0	0	None	121	133.11	89	50.95	2595.58	1006	58	1.39	8320	672	1410	130	64	8320
	1 cell(3, 1)	769363	0	0	None	90	91.77	84	14.08	198.31	150	55	0.97	8384	802	1410	131	64	8384
	1 cell(4, 1)	729530	0	0	None	87	87.68	91	10.41	108.28	169	56	0.92	8320	933	1410	130	64	8320
	1 cell(5, 1)	721031	0	0	None	87	86.66	87	9.2	84.7	123	50	0.91	8320	1063	1410	130	64	8320
	1 cell(6, 1)	715074	0	0	None	86	85.95	84	9.45	89.3	129	56	0.9	8320	1193	1410	130	64	8320
	1 cell(7, 1)	704560	0	0	None	84	84.68	80	12.02	144.56	203	53	0.89	8320	1323	1410	130	64	8320
	1 cell(8, 1)	653208	0	0	None	78	77.91	76	9.63	92.77	114	42	0.82	8384	1453	1410	131	64	8384
	1 cell(9, 1)	652192	0	0	None	78	78.39	80	9.13	83.32	110	47	0.82	8320	1584	1410	130	64	8320
	1 cell(10, 1)	646489	0	0	None	77	77.7	78	9.46	89.54	119	37	0.81	8320	1714	1410	130	64	8320
	2 cell(1, 1)	2222412	0	0	None	364	388.53	227	188.93	35693.9	835	64	2.8	5720	545	1466	130	44	5720
	2 cell(2, 1)	1061961	0	0	None	180	185.66	133	66.81	4463.29	413	55	1.34	5720	675	1466	130	44	5720
	2 cell(3, 1)	615707	0	0	None	105	107.64	104	19.77	390.97	183	60	0.78	5720	805	1466	130	44	5720
	2 cell(4, 1)	543865	0	0	None	95	95.08	101	12.99	168.66	141	57	0.68	5720	935	1466	130	44	5720
	2 cell(5, 1)	532219	0	0	None	93	93.05	91	11.32	128.21	145	55	0.67	5720	1065	1466	130	44	5720
	2 cell(6, 1)	529105	0	0	None	92	92.5	93	11.03	121.57	136	56	0.67	5720	1195	1466	130	44	5720
	2 cell(7, 1)	499238	0	0	None	87	87.28	84	11.51	132.39	135	47	0.63	5720	1325	1466	130	44	5720
	2 cell(8, 1)	464589	0	0	None	81	81.22	79	10.32	106.58	124	47	0.59	5720	1455	1466	130	44	5720
	2 cell(9, 1)	469765	0	0	None	82	82.13	78	10.5	110.15	138	46	0.59	5720	1585	1466	130	44	5720
	2 cell(10, 1)	463965	0	0	None	81	81.11	80	9.36	87.6	115	46	0.58	5720	1715	1466	130	44	5720
	3 cell(1, 1)	1910350	0	0	None	213	243.05	160	109.47	11983.2	548	56	2.41	7860	543	1518	131	60	7860
	3 cell(2, 1)	1706962	0	0	None	196	217.17	114	100.28	10056.6	516	63	2.15	7860	674	1518	131	60	7860
	3 cell(3, 1)	1163171	0	0	None	139	147.99	105	46.72	2182.63	277	67	1.46	7860	805	1518	131	60	7860
	3 cell(4, 1)	814987	0	0	None	103	103.69	97	16.34	267.02	167	60	1.03	7860	936	1518	131	60	7860
	3 cell(5, 1)	780837	0	0	None	98	99.34	92	13.92	193.78	157	58	0.98	7860	1067	1518	131	60	7860
	3 cell(6, 1)	740900	0	0	None	94	94.26	95	11.36	129.05	141	51	0.93	7860	1198	1518	131	60	7860
	3 cell(7, 1)	686271	0	0	None	87	87.31	84	11.22	125.93	128	50	0.86	7860	1329	1518	131	60	7860
	3 cell(8, 1)	659019	0	0	None	83	83.84	79	10.64	113.15	120	51	0.83	7860	1460	1518	131	60	7860
	3 cell(9, 1)	651061	0	0	None	82	82.83	80	11.37	129.2	129	47	0.82	7860	1591	1518	131	60	7860
	3 cell(10, 1)	645851	0	0	None	82	82.17	81	10.63	112.92	120	47	0.81	7860	1722	1518	131	60	7860
	4 cell(1, 1)	3788535	0	0	None	151.5	251.23	109	226.23	51182	1144	58	4.77	15080	545	1606	130	116	15080
	4 cell(2, 1)	3489336	0	0	None	144	229.62	95	186.58	34811.8	879	62	4.39	15196	675	1606	131	116	15196
	4 cell(3, 1)	3386200	0	0	None	138	224.55	101	191.15	36536.9	917	62	4.26	15080	806	1606	130	116	15080
	4 cell(4, 1)	2028352	0	0	None	108	133.48	93	69.01	4762.3	834	60	2.55	15196	936	1606	131	116	15196
	4 cell(5, 1)	1763973	0	0	None	102	116.97	92	46.77	2187.86	993	62	2.22	15080	1067	1606	130	116	15080
	4 cell(6, 1)	1557937	0	0	None	97	103.31	95	25.68	659.59	234	57	1.96	15080	1197	1606	130	116	15080
	4 cell(7, 1)	1546616	0	0	None	94	101.78	83	28.92	836.37	250	49	1.95	15196	1327	1606	131	116	15196
	4 cell(8, 1)	1445212	0	0	None	92	95.84	86	20.03	401.07	186	53	1.82	15080	1458	1606	130	116	15080
	4 cell(9, 1)	1459835	0	0	None	93	96.07	94	19.7	388.19	226	41	1.84	15196	1588	1606	131	116	15196
	4 cell(10, 1)	1394168	0	0	None	90	92.45	88	15.65	245.02	158	52	1.76	15080	1719	1606	130	116	15080
	5 cell(1, 1)	3378876	0	0	None	128	206.23	89	193.82	37567.5	1081	50	4.25	16384	544	1744	128	128	16384
	5 cell(2, 1)	2960926	0	0	None	123	180.72	85	135.78	18435.8	672	50	3.73	16384	672	1744	128	128	16384
	5 cell(3, 1)	3188502	0	0	None	116	194.61	85	168.83	28505.1	837	54	4.02	16384	800	1744	128	128	16384
	5 cell(4, 1)	2982164	0	0	None	108	182.02	80	154.49	23867.9	744	52	3.76	16384	928	1744	128	128	16384
	5 cell(5, 1)	2911762	0	0	None	103	177.72	80	155.38	24144.4	779	44	3.67	16384	1056	1744	128	128	16384
	5 cell(6, 1)	2607256	0	0	None	111	159.13	81	110.56	12222.8	527	52	3.28	16384	1184	1744	128	128	16384
	5 cell(7, 1)	3390527	0	0	None	111	206.94	88	511.45	261585	13954	46	4.27	16384	1312	1744	128	128	16384
	5 cell(8, 1)	2752303	0	0	None	108	167.99	82	135.23	18287.9	656	50	3.47	16384	1440	1744	128	128	16384
	5 cell(9, 1)	2849853	0	0	None	109	173.94	86	145.16	21072.3	739	48	3.59	16384	1568	1744	128	128	16384
	5 cell(10, 1)	2660262	0	0	None	104	162.37	89	138.41	19157.4	804	47	3.35	16384	1696	1744	128	128	16384
	6	787973	0	0	None	73	72.8	70	8.57	73.52	107	33	0.99	10824	534	1189	132	82	10824

## Sheet: App Fraction Bound
		Volume	Area		Minus Backg.	Normalization	Bound apparent
50bp	1 cell(1, 1)	3221025	8320		2.61534e+06	1	0
	1 cell(2, 1)	1107444	8320		501759	0.191852	0.808148
	1 cell(3, 1)	769363	8384		159019	0.0608023	0.939198
	1 cell(4, 1)	729530	8320		123845	0.0473533	0.952647
	1 cell(5, 1)	721031	8320		115346	0.0441036	0.955896
	1 cell(6, 1)	715074	8320		109389	0.0418259	0.958174
	1 cell(7, 1)	704560	8320		98874.9	0.0378058	0.962194
	1 cell(8, 1)	653208	8384		42863.8	0.0163894	0.983611
	1 cell(9, 1)	652192	8320		46506.9	0.0177824	0.982218
	1 cell(10, 1)	646489	8320		40803.9	0.0156018	0.984398
40bp	2 cell(1, 1)	2222412	5720		1.806e+06	1	0
	2 cell(2, 1)	1061961	5720		645553	0.357448	0.642552
	2 cell(3, 1)	615707	5720		199299	0.110353	0.889647
	2 cell(4, 1)	543865	5720		127457	0.0705738	0.929426
	2 cell(5, 1)	532219	5720		115811	0.0641253	0.935875
	2 cell(6, 1)	529105	5720		112697	0.062401	0.937599
	2 cell(7, 1)	499238	5720		82829.5	0.0458634	0.954137
	2 cell(8, 1)	464589	5720		48180.5	0.026678	0.973322
	2 cell(9, 1)	469765	5720		53356.5	0.029544	0.970456
	2 cell(10, 1)	463965	5720		47556.5	0.0263325	0.973668
30 bp	3 cell(1, 1)	1910350	7860		1.33815e+06	1	0
	3 cell(2, 1)	1706962	7860		1.13476e+06	0.848008	0.151992
	3 cell(3, 1)	1163171	7860		590973	0.441634	0.558366
	3 cell(4, 1)	814987	7860		242789	0.181436	0.818564
	3 cell(5, 1)	780837	7860		208639	0.155916	0.844084
	3 cell(6, 1)	740900	7860		168702	0.126071	0.873929
	3 cell(7, 1)	686271	7860		114073	0.0852469	0.914753
	3 cell(8, 1)	659019	7860		86821.3	0.0648815	0.935119
	3 cell(9, 1)	651061	7860		78863.3	0.0589345	0.941066
	3 cell(10, 1)	645851	7860		73653.3	0.0550411	0.944959
20 bp	4 cell(1, 1)	3788535	15080		2.69073e+06	1	0
	4 cell(2, 1)	3489336	15196		2.38309e+06	0.885665	0.114335
	4 cell(3, 1)	3386200	15080		2.2884e+06	0.850474	0.149526
	4 cell(4, 1)	2028352	15196		922103	0.342696	0.657304
	4 cell(5, 1)	1763973	15080		666169	0.247579	0.752421
	4 cell(6, 1)	1557937	15080		460133	0.171007	0.828993
	4 cell(7, 1)	1546616	15196		440367	0.163661	0.836339
	4 cell(8, 1)	1445212	15080		347408	0.129113	0.870887
	4 cell(9, 1)	1459835	15196		353586	0.131409	0.868591
	4 cell(10, 1)	1394168	15080		296364	0.110142	0.889858
10 bp	5 cell(1, 1)	3378876	16384		2.18614e+06	0.994699	0.00530123
	5 cell(2, 1)	2960926	16384		1.76819e+06	0.804531	0.195469
	5 cell(3, 1)	3188502	16384		1.99577e+06	0.908078	0.0919217
	5 cell(4, 1)	2982164	16384		1.78943e+06	0.814194	0.185806
	5 cell(5, 1)	2911762	16384		1.71903e+06	0.782161	0.217839
	5 cell(6, 1)	2607256	16384		1.41452e+06	0.64361	0.35639
	5 cell(7, 1)	3390527	16384		2.19779e+06	1	0
	5 cell(8, 1)	2752303	16384		1.55957e+06	0.709607	0.290393
	5 cell(9, 1)	2849853	16384		1.65712e+06	0.753992	0.246008
	5 cell(10, 1)	2660262	16384		1.46753e+06	0.667728	0.332272
Backg	6	787973	10824		0
