# Supplementary material for: A novel single alpha-helix DNA-binding domain in CAF-1 promotes gene silencing and DNA damage survival through tetrasome-length DNA selectivity and spacer function
Source: eLife journal article supplement (doi:10.7554/elife.83538), 2023-06-14
Supplement: fig4-data1 [file 211214 Cy5 ladder EMSA with yWHD_Table.xlsx]

## Sheet: 211214 Cy5 ladder EMSA with yWH
	Name	Volume	Background	Background Level	Background Type	Median Intensity	Average Intensity	Mode Intensity	Std Dev	Variance	Min Intensity	Max Intensity	Percent	Area > Background	Centre X	Centre Y	Width	Height	Area	Comment
	1 cell(1, 1)	3010906	0	0	None	340	380.16	108	247.97	61489.4	1031	55	2.94	7920	588	1389	132	60	7920
	1 cell(2, 1)	2182570	0	0	None	248	275.58	118	163.58	26759.1	729	52	2.13	7920	720	1389	132	60	7920
	1 cell(3, 1)	1894357	0	0	None	204	239.19	88	139.66	19505.2	626	59	1.85	7920	852	1389	132	60	7920
	1 cell(4, 1)	1673272	0	0	None	179.5	211.27	89	118.43	14025.5	556	57	1.63	7920	984	1389	132	60	7920
	1 cell(5, 1)	1440486	0	0	None	171	181.88	111	77.1	5943.97	368	57	1.41	7920	1116	1389	132	60	7920
	1 cell(6, 1)	1286427	0	0	None	159	162.43	83	59.36	3523.59	316	57	1.26	7920	1248	1389	132	60	7920
	1 cell(7, 1)	1324446	0	0	None	160	167.23	77	63.31	4008.52	319	53	1.29	7920	1380	1389	132	60	7920
	1 cell(8, 1)	1067751	0	0	None	137	134.82	125	36.85	1357.62	215	49	1.04	7920	1512	1389	132	60	7920
	1 cell(9, 1)	895871	0	0	None	116	113.12	116	23.59	556.46	242	52	0.87	7920	1644	1389	132	60	7920
	1 cell(10, 1)	862175	0	0	None	111	108.86	114	19.28	371.55	160	49	0.84	7920	1776	1389	132	60	7920
	2 cell(1, 1)	2736581	0	0	None	283	331.59	254	184.26	33953	815	59	2.67	8253	590	1449	131	63	8253
	2 cell(2, 1)	2182235	0	0	None	225	262.41	85	139.59	19485.9	613	62	2.13	8316	722	1449	132	63	8316
	2 cell(3, 1)	1928257	0	0	None	208	233.64	179	110.01	12101.1	528	57	1.88	8253	853	1449	131	63	8253
	2 cell(4, 1)	1718484	0	0	None	188	206.65	87	93.99	8833.79	444	57	1.68	8316	985	1449	132	63	8316
	2 cell(5, 1)	1450761	0	0	None	163	175.79	153	68.12	4640.11	354	47	1.42	8253	1116	1449	131	63	8253
	2 cell(6, 1)	1253333	0	0	None	145	151.86	146	52.17	2721.28	292	56	1.22	8253	1247	1449	131	63	8253
	2 cell(7, 1)	1300599	0	0	None	148	156.4	79	58.14	3379.86	300	56	1.27	8316	1379	1449	132	63	8316
	2 cell(8, 1)	1029391	0	0	None	124	124.73	116	32.86	1079.69	218	50	1	8253	1510	1449	131	63	8253
	2 cell(9, 1)	889978	0	0	None	109	107.02	109	20.82	433.49	163	48	0.87	8316	1642	1449	132	63	8316
	2 cell(10, 1)	864269	0	0	None	107	104.72	108	18.09	327.13	161	47	0.84	8253	1773	1449	131	63	8253
	3 cell(1, 1)	1911818	0	0	None	206	229.9	141	111.88	12516.5	788	51	1.87	8316	582	1515	132	63	8316
	3 cell(2, 1)	1685398	0	0	None	175	201.15	140	91.08	8296.13	445	66	1.64	8379	714	1516	133	64	8379
	3 cell(3, 1)	1536960	0	0	None	166	184.82	128	75.43	5689.43	403	60	1.5	8316	847	1516	132	63	8316
	3 cell(4, 1)	1404248	0	0	None	155	168.86	122	66.03	4360.24	349	62	1.37	8316	979	1516	132	63	8316
	3 cell(5, 1)	1234054	0	0	None	138	147.28	128	49.78	2477.6	282	59	1.2	8379	1111	1517	133	64	8379
	3 cell(6, 1)	1102999	0	0	None	128	132.64	128	40.82	1666.48	251	58	1.08	8316	1244	1517	132	63	8316
	3 cell(7, 1)	1124398	0	0	None	129	135.21	123	44.11	1945.89	263	49	1.1	8316	1376	1517	132	63	8316
	3 cell(8, 1)	959306	0	0	None	112	115.36	112	29.52	871.22	241	39	0.94	8316	1508	1517	132	63	8316
	3 cell(9, 1)	864146	0	0	None	104	103.13	108	19.27	371.26	163	51	0.84	8379	1640	1518	133	64	8379
	3 cell(10, 1)	849278	0	0	None	103	102.13	104	17.83	317.79	199	46	0.83	8316	1773	1518	132	63	8316
	4 cell(1, 1)	3465620	0	0	None	149	252.01	104	228.78	52340.6	1162	61	3.38	13752	594	1599	133	105	13752
	4 cell(2, 1)	3164245	0	0	None	141	230.09	97	194.14	37689.4	890	65	3.09	13752	724	1599	133	105	13752
	4 cell(3, 1)	2989532	0	0	None	140	215.74	96	166.5	27722.3	766	57	2.92	13857	855	1599	134	105	13857
	4 cell(4, 1)	2742703	0	0	None	138	199.44	95	145.08	21049.2	691	62	2.68	13752	985	1599	133	105	13752
	4 cell(5, 1)	2432584	0	0	None	131	176.89	95	118.33	14000.9	639	56	2.37	13752	1115	1599	133	105	13752
	4 cell(6, 1)	2210103	0	0	None	126	160.71	96	95.9	9196.45	531	57	2.16	13752	1245	1599	133	105	13752
	4 cell(7, 1)	2231423	0	0	None	121	162.26	99	105.12	11050.8	539	50	2.18	13752	1375	1599	133	105	13752
	4 cell(8, 1)	1898419	0	0	None	113	137	88	71.51	5114.22	443	54	1.85	13857	1506	1599	134	105	13857
	4 cell(9, 1)	1570792	0	0	None	106	114.22	111	37.2	1384.02	318	53	1.53	13752	1636	1599	133	105	13752
	4 cell(10, 1)	1529042	0	0	None	103	111.19	99	33.57	1127.11	257	55	1.49	13752	1766	1599	133	105	13752
	5 cell(1, 1)	3658416	0	0	None	126	196.94	98	184.76	34137.6	1124	57	3.57	18576	601	1727	129	144	18576
	5 cell(2, 1)	3598322	0	0	None	130	195.22	90	159.73	25513.9	844	49	3.51	18432	730	1727	128	144	18432
	5 cell(3, 1)	3439247	0	0	None	122	185.14	87	145.88	21282.3	745	51	3.36	18576	858	1727	129	144	18576
	5 cell(4, 1)	3365874	0	0	None	116	181.19	81	147.72	21820.4	746	50	3.28	18576	987	1727	129	144	18576
	5 cell(5, 1)	3301718	0	0	None	114	177.74	82	143.39	20561	721	51	3.22	18576	1116	1727	129	144	18576
	5 cell(6, 1)	3339474	0	0	None	118	181.18	81	151.23	22870.6	777	49	3.26	18432	1245	1727	128	144	18432
	5 cell(7, 1)	3288358	0	0	None	109	177.02	76	154.44	23852.3	751	46	3.21	18576	1373	1727	129	144	18576
	5 cell(8, 1)	3266848	0	0	None	111	175.86	77	150	22498.5	741	48	3.19	18576	1502	1727	129	144	18576
	5 cell(9, 1)	3258346	0	0	None	115	176.78	82	148.95	22185.3	750	40	3.18	18432	1631	1727	128	144	18432
	5 cell(10, 1)	3277321	0	0	None	108	176.43	84	167.31	27993.4	978	46	3.2	18576	1759	1727	129	144	18576
	7	785536	0	0	None	71	71.54	73	12.61	159.11	546	42	0.77	10980	572	1163	122	90	10980

## Sheet: App Fraction  Bound
		Volume	Area		Minus Backg.	Normalization	Bound apparent
50bp	1 cell(1, 1)	3010906	7920		2.44429e+06	1	0
	1 cell(2, 1)	2182570	7920		1.61595e+06	0.661114	0.338886
	1 cell(3, 1)	1894357	7920		1.32774e+06	0.543201	0.456799
	1 cell(4, 1)	1673272	7920		1.10666e+06	0.452751	0.547249
	1 cell(5, 1)	1440486	7920		873870	0.357515	0.642485
	1 cell(6, 1)	1286427	7920		719811	0.294487	0.705513
	1 cell(7, 1)	1324446	7920		757830	0.310041	0.689959
	1 cell(8, 1)	1067751	7920		501135	0.205023	0.794977
	1 cell(9, 1)	895871	7920		329255	0.134704	0.865296
	1 cell(10, 1)	862175	7920		295559	0.120918	0.879082
40bp	2 cell(1, 1)	2736581	8253		2.14614e+06	1	0
	2 cell(2, 1)	2182235	8316		1.58729e+06	0.739601	0.260399
	2 cell(3, 1)	1928257	8253		1.33782e+06	0.623359	0.376641
	2 cell(4, 1)	1718484	8316		1.12354e+06	0.523515	0.476485
	2 cell(5, 1)	1450761	8253		860321	0.400869	0.599131
	2 cell(6, 1)	1253333	8253		662893	0.308877	0.691123
	2 cell(7, 1)	1300599	8316		705652	0.3288	0.6712
	2 cell(8, 1)	1029391	8253		438951	0.20453	0.79547
	2 cell(9, 1)	889978	8316		295031	0.13747	0.86253
	2 cell(10, 1)	864269	8253		273829	0.127591	0.872409
30 bp	3 cell(1, 1)	1911818	8316		1.31687e+06	1	0
	3 cell(2, 1)	1685398	8379		1.08594e+06	0.824639	0.175361
	3 cell(3, 1)	1536960	8316		942013	0.715342	0.284658
	3 cell(4, 1)	1404248	8316		809301	0.614564	0.385436
	3 cell(5, 1)	1234054	8379		634600	0.4819	0.5181
	3 cell(6, 1)	1102999	8316		508052	0.385802	0.614198
	3 cell(7, 1)	1124398	8316		529451	0.402052	0.597948
	3 cell(8, 1)	959306	8316		364359	0.276685	0.723315
	3 cell(9, 1)	864146	8379		264692	0.201001	0.798999
	3 cell(10, 1)	849278	8316		254331	0.193133	0.806867
20 bp	4 cell(1, 1)	3465620	13752		2.48177e+06	1	0
	4 cell(2, 1)	3164245	13752		2.18039e+06	0.878564	0.121436
	4 cell(3, 1)	2989532	13857		1.99817e+06	0.805139	0.194861
	4 cell(4, 1)	2742703	13752		1.75885e+06	0.708709	0.291291
	4 cell(5, 1)	2432584	13752		1.44873e+06	0.58375	0.41625
	4 cell(6, 1)	2210103	13752		1.22625e+06	0.494104	0.505896
	4 cell(7, 1)	2231423	13752		1.24757e+06	0.502695	0.497305
	4 cell(8, 1)	1898419	13857		907055	0.365488	0.634512
	4 cell(9, 1)	1570792	13752		586940	0.236501	0.763499
	4 cell(10, 1)	1529042	13752		545190	0.219678	0.780322
10 bp	5 cell(1, 1)	3658416	18576		2.32944e+06	1	0
	5 cell(2, 1)	3598322	18432		2.27965e+06	0.978625	0.021375
	5 cell(3, 1)	3439247	18576		2.11027e+06	0.905914	0.0940864
	5 cell(4, 1)	3365874	18576		2.0369e+06	0.874416	0.125584
	5 cell(5, 1)	3301718	18576		1.97275e+06	0.846874	0.153126
	5 cell(6, 1)	3339474	18432		2.0208e+06	0.867505	0.132495
	5 cell(7, 1)	3288358	18576		1.95939e+06	0.841139	0.158861
	5 cell(8, 1)	3266848	18576		1.93788e+06	0.831905	0.168095
	5 cell(9, 1)	3258346	18432		1.93968e+06	0.832678	0.167322
	5 cell(10, 1)	3277321	18576		1.94835e+06	0.836401	0.163599
Backg	7	785536	10980		0
