# Supplementary material for: A novel single alpha-helix DNA-binding domain in CAF-1 promotes gene silencing and DNA damage survival through tetrasome-length DNA selectivity and spacer function
Source: eLife journal article supplement (doi:10.7554/elife.83538), 2023-06-14
Supplement: fig4-data1 [file 211222 Cy5 ladder EMSA with yCAF1 deltaWHD_Grids_Table.xlsx]

## Sheet: 211222 Cy5 ladder EMSA with yCA
	Name	Volume	Background	Background Level	Background Type	Median Intensity	Average Intensity	Mode Intensity	Std Dev	Variance	Min Intensity	Max Intensity	Percent	Area > Background	Centre X	Centre Y	Width	Height	Area	Comment
	1 cell(1, 1)	3240414	0	0	None	338	381	86	231.73	53698	1015	56	3.38	8505	406	1472	135	63	8505
	1 cell(2, 1)	1462937	0	0	None	160	173.29	102	65.46	4285.31	358	63	1.53	8442	541	1472	134	63	8442
	1 cell(3, 1)	1368130	0	0	None	135	160.86	113	73.75	5439.01	344	54	1.43	8505	675	1473	135	64	8505
	1 cell(4, 1)	944055	0	0	None	104	111.83	93	29	840.79	215	52	0.99	8442	810	1473	134	63	8442
	1 cell(5, 1)	945796	0	0	None	108	111.2	92	26.28	690.78	200	55	0.99	8505	944	1473	135	63	8505
	1 cell(6, 1)	894524	0	0	None	102	105.96	87	23.18	537.27	193	54	0.93	8442	1079	1473	134	63	8442
	1 cell(7, 1)	885475	0	0	None	98	104.89	83	45.78	2095.88	1188	53	0.92	8442	1213	1473	134	63	8442
	1 cell(8, 1)	838630	0	0	None	92	98.6	82	24.09	580.37	359	44	0.88	8505	1347	1474	135	64	8505
	1 cell(9, 1)	848193	0	0	None	93	99.73	77	25.2	634.99	179	52	0.89	8505	1482	1474	135	63	8505
	1 cell(10, 1)	839040	0	0	None	96	99.39	85	21.31	454.3	162	47	0.88	8442	1617	1474	134	63	8442
	2 cell(1, 1)	2130056	0	0	None	345	381.32	88	207.27	42959.2	934	56	2.22	5586	406	1526	133	42	5586
	2 cell(2, 1)	1434673	0	0	None	244	256.83	181	107.75	11610	548	62	1.5	5586	539	1526	133	42	5586
	2 cell(3, 1)	1464138	0	0	None	229	260.15	191	121.66	14802.2	525	58	1.53	5628	673	1526	134	42	5628
	2 cell(4, 1)	971375	0	0	None	160	173.89	125	64.69	4185.27	345	53	1.01	5586	806	1526	133	42	5586
	2 cell(5, 1)	925411	0	0	None	165	165.67	147	52.36	2741.56	300	63	0.97	5586	939	1526	133	42	5586
	2 cell(6, 1)	862929	0	0	None	154	154.48	166	47.81	2285.34	281	52	0.9	5586	1072	1526	133	42	5586
	2 cell(7, 1)	785819	0	0	None	137	140.68	124	39.74	1579.35	259	50	0.82	5586	1205	1526	133	42	5586
	2 cell(8, 1)	699409	0	0	None	121	124.27	113	29.25	855.36	419	57	0.73	5628	1339	1526	134	42	5628
	2 cell(9, 1)	707114	0	0	None	126	126.59	123	30.09	905.53	214	55	0.74	5586	1472	1526	133	42	5586
	2 cell(10, 1)	686364	0	0	None	123	122.87	117	27.45	753.55	225	50	0.72	5586	1605	1526	133	42	5586
	3 cell(1, 1)	1815012	0	0	None	217	252.72	158	123.59	15274.6	588	62	1.9	7182	410	1578	133	54	7182
	3 cell(2, 1)	1742514	0	0	None	213	242.62	153	108.73	11822.5	541	68	1.82	7182	543	1578	133	54	7182
	3 cell(3, 1)	1718394	0	0	None	199	241.08	152	118.75	14101.8	589	71	1.79	7128	676	1578	132	54	7128
	3 cell(4, 1)	1537885	0	0	None	182.5	214.13	136	98.07	9617.75	485	71	1.61	7182	808	1578	133	54	7182
	3 cell(5, 1)	1546190	0	0	None	198	215.29	139	89.23	7961.65	468	72	1.61	7182	941	1578	133	54	7182
	3 cell(6, 1)	1495628	0	0	None	187	208.25	145	92.47	8550.01	456	59	1.56	7182	1074	1578	133	54	7182
	3 cell(7, 1)	1445004	0	0	None	182	201.2	139	89.12	7942.84	440	63	1.51	7182	1207	1578	133	54	7182
	3 cell(8, 1)	1305408	0	0	None	170	183.14	92	79.04	6246.66	383	61	1.36	7128	1340	1577	132	55	7128
	3 cell(9, 1)	1288957	0	0	None	169	179.47	87	81.12	6579.81	393	61	1.35	7182	1472	1577	133	54	7182
	3 cell(10, 1)	1257573	0	0	None	165	175.1	90	78.38	6142.73	360	62	1.31	7182	1605	1576	133	55	7182
	4 cell(1, 1)	3175923	0	0	None	179	298.55	105	263.52	69444	1227	66	3.32	10638	417	1647	134	80	10638
	4 cell(2, 1)	3139772	0	0	None	192	295.15	113	237.7	56502.9	1048	75	3.28	10638	549	1647	134	80	10638
	4 cell(3, 1)	3109467	0	0	None	189	292.3	104	248.88	61943.7	1176	64	3.25	10638	681	1647	134	80	10638
	4 cell(4, 1)	2860610	0	0	None	182	268.9	109	210.28	44215.9	942	66	2.99	10638	813	1647	134	80	10638
	4 cell(5, 1)	2869243	0	0	None	180	269.72	89	211.81	44863.3	955	69	3	10638	945	1647	134	80	10638
	4 cell(6, 1)	2762042	0	0	None	169	259.64	93	207.62	43107.2	905	63	2.88	10638	1077	1647	134	80	10638
	4 cell(7, 1)	2793482	0	0	None	163	262.59	97	215.99	46650.4	1019	59	2.92	10638	1209	1647	134	80	10638
	4 cell(8, 1)	2681552	0	0	None	150	252.07	90	207.77	43167.8	896	60	2.8	10638	1341	1647	134	80	10638
	4 cell(9, 1)	2746534	0	0	None	138	258.18	97	221.79	49189.5	918	58	2.87	10638	1473	1647	134	80	10638
	4 cell(10, 1)	2738753	0	0	None	124	257.45	96	244.55	59805.1	1087	52	2.86	10638	1605	1647	134	80	10638
	5 cell(1, 1)	3158620	0	0	None	149	239.36	112	206.27	42548.2	1126	58	3.3	13196	423	1743	135	100	13196
	5 cell(2, 1)	3082932	0	0	None	148	233.63	114	180.29	32505.7	841	63	3.22	13196	554	1743	135	100	13196
	5 cell(3, 1)	3015500	0	0	None	138	230.26	112	192.19	36936.3	941	64	3.15	13096	685	1743	134	100	13096
	5 cell(4, 1)	2762059	0	0	None	134	209.31	103	158.65	25169.2	805	54	2.88	13196	815	1743	135	100	13196
	5 cell(5, 1)	2746690	0	0	None	132	208.15	95	162.35	26358.3	782	57	2.87	13196	946	1743	135	100	13196
	5 cell(6, 1)	2658929	0	0	None	128	201.5	93	155.41	24152.5	732	62	2.78	13196	1077	1743	135	100	13196
	5 cell(7, 1)	2684161	0	0	None	129	203.41	97	164.06	26914.5	820	58	2.8	13196	1208	1743	135	100	13196
	5 cell(8, 1)	2544130	0	0	None	123	194.27	87	151.93	23083.2	749	54	2.66	13096	1339	1743	134	100	13096
	5 cell(9, 1)	2688903	0	0	None	124	203.77	87	168.51	28394.7	795	53	2.81	13196	1469	1743	135	100	13196
	5 cell(10, 1)	2661137	0	0	None	118	201.66	90	186.4	34743.3	975	41	2.78	13196	1600	1743	135	100	13196
	6	806486	0	0	None	74	73.91	74	8.35	69.69	102	43	0.84	10912	410	1200	124	88	10912

## Sheet: App Fract Bound
		Volume	Area		Minus Backg.	Normalization	Bound apparent
50bp	1 cell(1, 1)	3240414	8505		2.61182e+06	1	0
	1 cell(2, 1)	1462937	8442		839004	0.321233	0.678767
	1 cell(3, 1)	1368130	8505		739541	0.283151	0.716849
	1 cell(4, 1)	944055	8442		320122	0.122566	0.877434
	1 cell(5, 1)	945796	8505		317207	0.12145	0.87855
	1 cell(6, 1)	894524	8442		270591	0.103602	0.896398
	1 cell(7, 1)	885475	8442		261542	0.100138	0.899862
	1 cell(8, 1)	838630	8505		210041	0.0804192	0.919581
	1 cell(9, 1)	848193	8505		219604	0.0840807	0.915919
	1 cell(10, 1)	839040	8442		215107	0.082359	0.917641
40bp	2 cell(1, 1)	2130056	5586		1.7172e+06	1	0
	2 cell(2, 1)	1434673	5586		1.02182e+06	0.595049	0.404951
	2 cell(3, 1)	1464138	5628		1.04818e+06	0.610401	0.389599
	2 cell(4, 1)	971375	5586		558524	0.325252	0.674748
	2 cell(5, 1)	925411	5586		512560	0.298485	0.701515
	2 cell(6, 1)	862929	5586		450078	0.262099	0.737901
	2 cell(7, 1)	785819	5586		372968	0.217195	0.782805
	2 cell(8, 1)	699409	5628		283454	0.165067	0.834933
	2 cell(9, 1)	707114	5586		294263	0.171362	0.828638
	2 cell(10, 1)	686364	5586		273513	0.159278	0.840722
30 bp	3 cell(1, 1)	1815012	7182		1.2842e+06	1	0
	3 cell(2, 1)	1742514	7182		1.21171e+06	0.943546	0.0564537
	3 cell(3, 1)	1718394	7128		1.19158e+06	0.927872	0.0721279
	3 cell(4, 1)	1537885	7182		1.00708e+06	0.784203	0.215797
	3 cell(5, 1)	1546190	7182		1.01538e+06	0.79067	0.20933
	3 cell(6, 1)	1495628	7182		964819	0.751298	0.248702
	3 cell(7, 1)	1445004	7182		914195	0.711877	0.288123
	3 cell(8, 1)	1305408	7128		778591	0.606283	0.393717
	3 cell(9, 1)	1288957	7182		758148	0.590365	0.409635
	3 cell(10, 1)	1257573	7182		726764	0.565926	0.434074
20 bp	4 cell(1, 1)	3175923	10638		2.38969e+06	1	0
	4 cell(2, 1)	3139772	10638		2.35354e+06	0.984872	0.0151279
	4 cell(3, 1)	3109467	10638		2.32323e+06	0.972191	0.0278095
	4 cell(4, 1)	2860610	10638		2.07437e+06	0.868053	0.131947
	4 cell(5, 1)	2869243	10638		2.08301e+06	0.871665	0.128335
	4 cell(6, 1)	2762042	10638		1.97581e+06	0.826805	0.173195
	4 cell(7, 1)	2793482	10638		2.00725e+06	0.839962	0.160038
	4 cell(8, 1)	2681552	10638		1.89532e+06	0.793123	0.206877
	4 cell(9, 1)	2746534	10638		1.9603e+06	0.820316	0.179684
	4 cell(10, 1)	2738753	10638		1.95252e+06	0.81706	0.18294
10 bp	5 cell(1, 1)	3158620	13196		2.18333e+06	1	0
	5 cell(2, 1)	3082932	13196		2.10764e+06	0.965334	0.0346663
	5 cell(3, 1)	3015500	13096		2.0476e+06	0.937834	0.0621662
	5 cell(4, 1)	2762059	13196		1.78677e+06	0.818369	0.181631
	5 cell(5, 1)	2746690	13196		1.7714e+06	0.811329	0.188671
	5 cell(6, 1)	2658929	13196		1.68364e+06	0.771133	0.228867
	5 cell(7, 1)	2684161	13196		1.70887e+06	0.78269	0.21731
	5 cell(8, 1)	2544130	13096		1.57623e+06	0.721939	0.278061
	5 cell(9, 1)	2688903	13196		1.71361e+06	0.784862	0.215138
	5 cell(10, 1)	2661137	13196		1.68584e+06	0.772145	0.227855
Backg	6	806486	10912		0
