# Supplementary material for: A novel single alpha-helix DNA-binding domain in CAF-1 promotes gene silencing and DNA damage survival through tetrasome-length DNA selectivity and spacer function
Source: eLife journal article supplement (doi:10.7554/elife.83538), 2023-06-14
Supplement: fig4-data1 [file 220111 Cy5 ladder EMSA with yCAF1 WT_Table.xlsx]

## Sheet: 220111 Cy5 ladder EMSA with yCA
	Name	Volume	Background	Background Level	Background Type	Median Intensity	Average Intensity	Mode Intensity	Std Dev	Variance	Min Intensity	Max Intensity	Percent	Area > Background	Centre X	Centre Y	Width	Height	Area	Comment
	1 cell(1, 1)	3110004	0	0	None	259	333.91	90	249.13	62063.9	1082	61	3.68	9314	398	1452	133	75	9314
	1 cell(2, 1)	2410156	0	0	None	207	260.73	102	169.42	28703.2	781	47	2.85	9244	531	1457	132	75	9244
	1 cell(3, 1)	1587984	0	0	None	136	170.51	105	90.19	8133.57	436	51	1.88	9313	663	1462	133	74	9313
	1 cell(4, 1)	1102861	0	0	None	107	119.31	91	37.16	1381.2	233	52	1.3	9244	796	1466	132	75	9244
	1 cell(5, 1)	1020805	0	0	None	104	109.6	86	27.11	734.95	204	48	1.21	9314	928	1471	133	75	9314
	1 cell(6, 1)	994340	0	0	None	102	106.76	90	22.45	503.92	184	56	1.18	9314	1061	1476	133	75	9314
	1 cell(7, 1)	965022	0	0	None	101	104.39	90	21.57	465.35	168	48	1.14	9244	1194	1481	132	75	9244
	1 cell(8, 1)	966722	0	0	None	101	103.8	98	18.64	347.57	165	55	1.14	9313	1326	1486	133	74	9313
	1 cell(9, 1)	930353	0	0	None	99	100.64	100	16.94	286.85	157	52	1.1	9244	1459	1490	132	75	9244
	1 cell(10, 1)	923434	0	0	None	100	99.14	103	15.84	250.87	146	53	1.09	9314	1591	1495	133	75	9314
	2 cell(1, 1)	2195156	0	0	None	388	414.73	89	220.13	48455.6	916	56	2.6	5293	395	1509	135	44	5293
	2 cell(2, 1)	1997450	0	0	None	361	377.16	93	177.63	31551.2	819	59	2.36	5296	528	1513	135	45	5296
	2 cell(3, 1)	1550956	0	0	None	273	290.88	216	134.34	18048.3	582	62	1.83	5332	662	1518	136	44	5332
	2 cell(4, 1)	1041768	0	0	None	193	196.71	142	73.07	5339.6	361	58	1.23	5296	795	1522	135	45	5296
	2 cell(5, 1)	868552	0	0	None	162	164.09	143	49.88	2487.96	286	63	1.03	5293	928	1527	135	44	5293
	2 cell(6, 1)	655613	0	0	None	125	123.86	133	24.44	597.1	190	58	0.78	5293	1061	1531	135	44	5293
	2 cell(7, 1)	659531	0	0	None	125	124.53	116	24.27	589.02	192	54	0.78	5296	1194	1535	135	45	5296
	2 cell(8, 1)	588886	0	0	None	108	110.44	111	21.91	480.15	306	51	0.7	5332	1328	1540	136	44	5332
	2 cell(9, 1)	556903	0	0	None	106	105.16	119	18.29	334.64	165	49	0.66	5296	1461	1544	135	45	5296
	2 cell(10, 1)	535033	0	0	None	102	101.08	103	16.22	263.24	145	53	0.63	5293	1594	1549	135	44	5293
	3 cell(1, 1)	1651083	0	0	None	193	219.97	147	102.07	10418.4	514	47	1.95	7506	389	1565	134	60	7506
	3 cell(2, 1)	1682861	0	0	None	201	222.51	149	94.54	8937.88	490	61	1.99	7563	523	1569	135	60	7563
	3 cell(3, 1)	1596209	0	0	None	195	212.66	146	88.91	7905.16	449	57	1.89	7506	658	1572	134	59	7506
	3 cell(4, 1)	1445274	0	0	None	176	191.1	140	75.93	5765.25	385	62	1.71	7563	792	1576	135	60	7563
	3 cell(5, 1)	1355448	0	0	None	166	180.58	143	67.5	4556.74	373	64	1.6	7506	927	1580	134	60	7506
	3 cell(6, 1)	1138847	0	0	None	144	151.72	121	46.66	2177.19	273	65	1.35	7506	1061	1584	134	60	7506
	3 cell(7, 1)	1150810	0	0	None	143	152.16	126	50.84	2584.39	288	60	1.36	7563	1195	1588	135	60	7563
	3 cell(8, 1)	964053	0	0	None	125	128.44	110	33.41	1116.48	215	53	1.14	7506	1330	1591	134	59	7506
	3 cell(9, 1)	861221	0	0	None	113	113.87	114	24.6	605.31	187	53	1.02	7563	1464	1595	135	60	7563
	3 cell(10, 1)	780869	0	0	None	105	104.03	107	16.79	281.85	156	55	0.92	7506	1599	1599	134	60	7506
	4 cell(1, 1)	2514092	0	0	None	181	280.09	97	227.08	51563.4	1062	57	2.97	8976	396	1652	132	71	8976
	4 cell(2, 1)	2473424	0	0	None	196.5	275.56	100	195.68	38289.9	840	61	2.93	8976	528	1655	132	70	8976
	4 cell(3, 1)	2437188	0	0	None	200	273.53	106	190.54	36304.9	827	63	2.88	8910	659	1657	131	71	8910
	4 cell(4, 1)	2336457	0	0	None	194	260.3	99	178.98	32032.9	752	59	2.76	8976	791	1660	132	70	8976
	4 cell(5, 1)	2337200	0	0	None	190	260.38	113	205.97	42424.4	3431	69	2.76	8976	923	1662	132	71	8976
	4 cell(6, 1)	2019477	0	0	None	171	224.99	97	139.73	19523.3	615	64	2.39	8976	1055	1665	132	71	8976
	4 cell(7, 1)	2048812	0	0	None	166	228.25	108	152.59	23283	666	56	2.42	8976	1187	1668	132	70	8976
	4 cell(8, 1)	1726176	0	0	None	142	193.73	117	116.04	13465.6	516	65	2.04	8910	1318	1670	131	71	8910
	4 cell(9, 1)	1449341	0	0	None	124	161.47	99	86.91	7552.59	426	60	1.71	8976	1450	1673	132	70	8976
	4 cell(10, 1)	2334529	0	0	None	116	260.09	98	1692.87	2.86581e+06	38960	59	2.76	8976	1582	1675	132	71	8976
	5 cell(1, 1)	2546891	0	0	None	127	192.07	89	148.47	22043.6	774	49	3.01	13260	405	1770	130	103	13260
	5 cell(2, 1)	2506373	0	0	None	134	189.02	88	129.79	16846.7	648	50	2.96	13260	535	1772	130	104	13260
	5 cell(3, 1)	2500730	0	0	None	128	188.59	86	135.53	18368.7	646	49	2.96	13260	665	1773	130	103	13260
	5 cell(4, 1)	2427881	0	0	None	124	183.1	81	131.98	17419.2	623	42	2.87	13260	795	1775	130	104	13260
	5 cell(5, 1)	2440988	0	0	None	126	184.09	86	130.6	17056.5	589	51	2.89	13260	925	1776	130	103	13260
	5 cell(6, 1)	2360008	0	0	None	125	177.98	84	120.74	14578.7	564	54	2.79	13260	1055	1777	130	103	13260
	5 cell(7, 1)	2425087	0	0	None	125	182.89	96	129.03	16648.3	588	55	2.87	13260	1185	1779	130	104	13260
	5 cell(8, 1)	2485600	0	0	None	124	187.45	91	133.76	17890.8	600	46	2.94	13260	1315	1780	130	103	13260
	5 cell(9, 1)	2469805	0	0	None	126	186.26	94	129.8	16848.8	614	49	2.92	13260	1445	1782	130	104	13260
	5 cell(10, 1)	2585816	0	0	None	122	195.01	94	156.83	24594.2	801	56	3.06	13260	1575	1783	130	103	13260
	6	837018	0	0	None	72	72.06	71	8.65	74.8	106	41	0.99	11616	392	1173	132	88	11616

## Sheet: App Fraction Bound
		Volume	Area		Minus Backg.	Normalization	Bound apparent
50bp	1 cell(1, 1)	3110004	9314		2.43886e+06	1	0
	1 cell(2, 1)	2410156	9244		1.74406e+06	0.715111	0.284889
	1 cell(3, 1)	1587984	9313		916914	0.37596	0.62404
	1 cell(4, 1)	1102861	9244		436763	0.179085	0.820915
	1 cell(5, 1)	1020805	9314		349663	0.143371	0.856629
	1 cell(6, 1)	994340	9314		323198	0.13252	0.86748
	1 cell(7, 1)	965022	9244		298924	0.122567	0.877433
	1 cell(8, 1)	966722	9313		295652	0.121225	0.878775
	1 cell(9, 1)	930353	9244		264255	0.108352	0.891648
	1 cell(10, 1)	923434	9314		252292	0.103447	0.896553
40bp	2 cell(1, 1)	2195156	5293		1.81376e+06	1	0
	2 cell(2, 1)	1997450	5296		1.61583e+06	0.890877	0.109123
	2 cell(3, 1)	1550956	5332		1.16675e+06	0.643276	0.356724
	2 cell(4, 1)	1041768	5296		660152	0.36397	0.63603
	2 cell(5, 1)	868552	5293		487153	0.268588	0.731412
	2 cell(6, 1)	655613	5293		274214	0.151185	0.848815
	2 cell(7, 1)	659531	5296		277915	0.153226	0.846774
	2 cell(8, 1)	588886	5332		204676	0.112847	0.887153
	2 cell(9, 1)	556903	5296		175287	0.0966433	0.903357
	2 cell(10, 1)	535033	5293		153634	0.0847046	0.915295
30 bp	3 cell(1, 1)	1651083	7506		1.11022e+06	0.975682	0.0243176
	3 cell(2, 1)	1682861	7563		1.13789e+06	1	0
	3 cell(3, 1)	1596209	7506		1.05535e+06	0.927458	0.0725418
	3 cell(4, 1)	1445274	7563		900304	0.791204	0.208796
	3 cell(5, 1)	1355448	7506		814586	0.715873	0.284127
	3 cell(6, 1)	1138847	7506		597985	0.52552	0.47448
	3 cell(7, 1)	1150810	7563		605840	0.532424	0.467576
	3 cell(8, 1)	964053	7506		423191	0.371908	0.628092
	3 cell(9, 1)	861221	7563		316251	0.277928	0.722072
	3 cell(10, 1)	780869	7506		240007	0.210922	0.789078
20 bp	4 cell(1, 1)	2514092	8976		1.86731e+06	1	0
	4 cell(2, 1)	2473424	8976		1.82664e+06	0.978221	0.021779
	4 cell(3, 1)	2437188	8910		1.79516e+06	0.961362	0.0386376
	4 cell(4, 1)	2336457	8976		1.68967e+06	0.904871	0.0951291
	4 cell(5, 1)	2337200	8976		1.69041e+06	0.905269	0.0947312
	4 cell(6, 1)	2019477	8976		1.37269e+06	0.735118	0.264882
	4 cell(7, 1)	2048812	8976		1.40203e+06	0.750828	0.249172
	4 cell(8, 1)	1726176	8910		1.08415e+06	0.580593	0.419407
	4 cell(9, 1)	1449341	8976		802554	0.429793	0.570207
	4 cell(10, 1)	2334529	8976		1.68774e+06	0.903838	0.0961616
10 bp	5 cell(1, 1)	2546891	13260		1.59141e+06	0.976125	0.0238755
	5 cell(2, 1)	2506373	13260		1.55089e+06	0.951272	0.048728
	5 cell(3, 1)	2500730	13260		1.54525e+06	0.947811	0.0521893
	5 cell(4, 1)	2427881	13260		1.4724e+06	0.903127	0.0968727
	5 cell(5, 1)	2440988	13260		1.48551e+06	0.911167	0.0888332
	5 cell(6, 1)	2360008	13260		1.40453e+06	0.861496	0.138504
	5 cell(7, 1)	2425087	13260		1.46961e+06	0.901414	0.0985864
	5 cell(8, 1)	2485600	13260		1.53012e+06	0.93853	0.0614695
	5 cell(9, 1)	2469805	13260		1.51432e+06	0.928842	0.0711577
	5 cell(10, 1)	2585816	13260		1.63034e+06	1	0
Background	6	837018	11616		0
