# Supplementary material for: A novel single alpha-helix DNA-binding domain in CAF-1 promotes gene silencing and DNA damage survival through tetrasome-length DNA selectivity and spacer function
Source: eLife journal article supplement (doi:10.7554/elife.83538), 2023-06-14
Supplement: fig4-data1 [file 220119 Cy5 ladder EMSA with yCAF1 WT_n1_Table.xlsx]

## Sheet: 220119 Cy5 ladder EMSA with yCA
	Name	Volume	Background	Background Level	Background Type	Median Intensity	Average Intensity	Mode Intensity	Std Dev	Variance	Min Intensity	Max Intensity	Percent	Area > Background	Centre X	Centre Y	Width	Height	Area	Comment
	1 cell(1, 1)	3173589	0	0	None	294	331.41	87	215.22	46319.2	996	53	3.35	9576	516	1361	133	72	9576
	1 cell(2, 1)	2135679	0	0	None	203	223.02	113	109.47	11984.8	578	65	2.25	9576	649	1361	133	72	9576
	1 cell(3, 1)	1526750	0	0	None	137	158.25	111	67.11	4503.53	354	56	1.61	9648	783	1361	134	72	9648
	1 cell(4, 1)	1419585	0	0	None	134	148.24	96	57.69	3328.19	318	56	1.5	9576	916	1361	133	72	9576
	1 cell(5, 1)	1074997	0	0	None	109	112.26	95	26.27	690.23	190	43	1.13	9576	1049	1361	133	72	9576
	1 cell(6, 1)	959834	0	0	None	97	100.23	91	16.53	273.12	155	58	1.01	9576	1182	1361	133	72	9576
	1 cell(7, 1)	987140	0	0	None	100	103.08	93	19.64	385.61	163	56	1.04	9576	1315	1361	133	72	9576
	1 cell(8, 1)	975725	0	0	None	98	101.13	92	19.43	377.36	165	46	1.03	9648	1449	1361	134	72	9648
	1 cell(9, 1)	999973	0	0	None	103	104.42	102	20.73	429.92	166	51	1.06	9576	1582	1361	133	72	9576
	1 cell(10, 1)	977132	0	0	None	103	102.04	104	18.11	328.07	155	46	1.03	9576	1715	1361	133	72	9576
	2 cell(1, 1)	2236162	0	0	None	358	397.54	96	240.07	57634.9	1027	66	2.36	5625	518	1417	136	42	5625
	2 cell(2, 1)	1869444	0	0	None	306	333.53	254	151.32	22897.2	680	72	1.97	5605	650	1417	135	42	5605
	2 cell(3, 1)	1460815	0	0	None	239	258.64	167	122.79	15076.5	530	70	1.54	5648	783	1417	135	42	5648
	2 cell(4, 1)	1334794	0	0	None	220	238.95	192	106.74	11392.5	470	59	1.41	5586	916	1417	133	42	5586
	2 cell(5, 1)	845228	0	0	None	151	151.31	152	41.27	1702.84	261	60	0.89	5586	1049	1417	133	42	5586
	2 cell(6, 1)	656668	0	0	None	120	117.56	133	17.82	317.56	166	63	0.69	5586	1182	1417	133	42	5586
	2 cell(7, 1)	617186	0	0	None	113	111.3	118	20.18	407.19	171	53	0.65	5545	1315	1417	133	42	5545
	2 cell(8, 1)	554406	0	0	None	99	99.59	98	14.57	212.39	147	61	0.58	5567	1448	1417	135	42	5567
	2 cell(9, 1)	560171	0	0	None	103	101.37	103	18.22	331.85	190	51	0.59	5526	1581	1417	135	42	5526
	2 cell(10, 1)	537568	0	0	None	98	96.91	100	14.23	202.45	136	48	0.57	5547	1714	1417	136	42	5547
	3 cell(1, 1)	2112171	0	0	None	207	238.83	86	127.72	16312.4	630	51	2.23	8844	508	1465	134	66	8844
	3 cell(2, 1)	1970850	0	0	None	201	222.85	170	88.89	7901.29	464	66	2.08	8844	642	1465	134	67	8844
	3 cell(3, 1)	2004716	0	0	None	209	228.38	163	98.26	9655.15	487	70	2.12	8778	775	1466	133	66	8778
	3 cell(4, 1)	1846246	0	0	None	189	208.76	155	86.84	7540.73	462	62	1.95	8844	909	1466	134	66	8844
	3 cell(5, 1)	1590143	0	0	None	160	179.8	134	72.69	5283.23	384	62	1.68	8844	1043	1466	134	67	8844
	3 cell(6, 1)	1418274	0	0	None	142	160.37	115	58.69	3444.37	323	66	1.5	8844	1177	1467	134	66	8844
	3 cell(7, 1)	1281990	0	0	None	132	144.96	122	51.13	2614.45	304	51	1.35	8844	1311	1467	134	66	8844
	3 cell(8, 1)	1054312	0	0	None	113	120.11	105	30.47	928.49	218	58	1.11	8778	1444	1467	133	66	8778
	3 cell(9, 1)	1073953	0	0	None	116	121.43	120	37.63	1416.11	253	51	1.13	8844	1578	1467	134	67	8844
	3 cell(10, 1)	911244	0	0	None	104	103.04	101	19.89	395.43	163	41	0.96	8844	1712	1468	134	66	8844
	4 cell(1, 1)	3047304	0	0	None	168	267.38	110	247.11	61061.2	1232	71	3.21	11397	533	1550	131	87	11397
	4 cell(2, 1)	2734283	0	0	None	153	239.91	105	187.87	35296.6	810	70	2.88	11397	664	1550	131	87	11397
	4 cell(3, 1)	2934888	0	0	None	170	257.51	103	205.27	42134.9	904	63	3.1	11397	795	1550	131	87	11397
	4 cell(4, 1)	2737415	0	0	None	161	240.19	106	178.59	31893.2	818	67	2.89	11397	926	1550	131	87	11397
	4 cell(5, 1)	2625476	0	0	None	152	228.62	101	174.82	30562.4	798	66	2.77	11484	1058	1550	132	87	11484
	4 cell(6, 1)	2428635	0	0	None	148	213.09	100	151.04	22811.9	738	67	2.56	11397	1189	1550	131	87	11397
	4 cell(7, 1)	2205649	0	0	None	127	193.53	94	148.97	22191.1	702	59	2.33	11397	1320	1550	131	87	11397
	4 cell(8, 1)	1938373	0	0	None	120	170.08	104	115.11	13251.4	559	61	2.05	11397	1451	1550	131	87	11397
	4 cell(9, 1)	1929004	0	0	None	115	169.26	94	128.85	16601.6	670	57	2.04	11397	1582	1550	131	87	11397
	4 cell(10, 1)	1450800	0	0	None	104	127.3	100	66.44	4414.04	391	47	1.53	11397	1713	1550	131	87	11397
	5 cell(1, 1)	3272680	0	0	None	114	175.84	92	154.51	23872.8	889	53	3.45	18612	516	1670	132	141	18612
	5 cell(2, 1)	3126770	0	0	None	118	166.73	95	112.18	12584.3	583	55	3.3	18753	648	1670	133	141	18753
	5 cell(3, 1)	3103857	0	0	None	112	166.77	93	127.11	16155.8	682	52	3.27	18612	781	1670	132	142	18612
	5 cell(4, 1)	3001020	0	0	None	110	161.24	86	118.18	13966.1	619	50	3.17	18612	913	1669	132	141	18612
	5 cell(5, 1)	3007947	0	0	None	107	160.4	90	122.18	14928.9	640	53	3.17	18753	1045	1669	133	142	18753
	5 cell(6, 1)	2785362	0	0	None	104	149.65	83	100.64	10128.5	512	52	2.94	18612	1178	1668	132	142	18612
	5 cell(7, 1)	2783507	0	0	None	102	149.55	82	114.66	13147.6	633	47	2.94	18612	1310	1667	132	141	18612
	5 cell(8, 1)	2803337	0	0	None	98	150.62	80	116.82	13645.9	590	46	2.96	18612	1442	1667	132	142	18612
	5 cell(9, 1)	2966081	0	0	None	101	158.17	83	140.33	19693	774	48	3.13	18753	1574	1666	133	141	18753
	5 cell(10, 1)	2836035	0	0	None	95	152.38	81	138.26	19114.5	798	39	2.99	18612	1707	1665	132	143	18612
	6	898896	0	0	None	72	71.59	74	8.16	66.55	103	40	0.95	12556	493	1058	146	86	12556

## Sheet: App Fract Bound
		Volume	Area		Minus Backg.	Normalization	Bound apparent
50bp	1 cell(1, 1)	3173589	9576		2.48803e+06	1	0
	1 cell(2, 1)	2135679	9576		1.45012e+06	0.582839	0.417161
	1 cell(3, 1)	1526750	9648		836040	0.336025	0.663975
	1 cell(4, 1)	1419585	9576		734030	0.295024	0.704976
	1 cell(5, 1)	1074997	9576		389442	0.156526	0.843474
	1 cell(6, 1)	959834	9576		274279	0.110239	0.889761
	1 cell(7, 1)	987140	9576		301585	0.121214	0.878786
	1 cell(8, 1)	975725	9648		285015	0.114554	0.885446
	1 cell(9, 1)	999973	9576		314418	0.126372	0.873628
	1 cell(10, 1)	977132	9576		291577	0.117192	0.882808
40bp	2 cell(1, 1)	2236162	5625		1.83346e+06	1	0
	2 cell(2, 1)	1869444	5605		1.46818e+06	0.800767	0.199233
	2 cell(3, 1)	1460815	5648		1.05647e+06	0.576215	0.423785
	2 cell(4, 1)	1334794	5586		934887	0.509902	0.490098
	2 cell(5, 1)	845228	5586		445321	0.242885	0.757115
	2 cell(6, 1)	656668	5586		256761	0.140042	0.859958
	2 cell(7, 1)	617186	5545		220214	0.120108	0.879892
	2 cell(8, 1)	554406	5567		155859	0.0850081	0.914992
	2 cell(9, 1)	560171	5526		164559	0.0897533	0.910247
	2 cell(10, 1)	537568	5547		140453	0.0766053	0.923395
30 bp	3 cell(1, 1)	2112171	8844		1.47902e+06	1	0
	3 cell(2, 1)	1970850	8844		1.3377e+06	0.90445	0.0955504
	3 cell(3, 1)	2004716	8778		1.37629e+06	0.930542	0.0694581
	3 cell(4, 1)	1846246	8844		1.2131e+06	0.820202	0.179798
	3 cell(5, 1)	1590143	8844		956993	0.647045	0.352955
	3 cell(6, 1)	1418274	8844		785124	0.53084	0.46916
	3 cell(7, 1)	1281990	8844		648840	0.438695	0.561305
	3 cell(8, 1)	1054312	8778		425887	0.287952	0.712048
	3 cell(9, 1)	1073953	8844		440803	0.298037	0.701963
	3 cell(10, 1)	911244	8844		278094	0.188026	0.811974
20 bp	4 cell(1, 1)	3047304	11397		2.23138e+06	1	0
	4 cell(2, 1)	2734283	11397		1.91836e+06	0.859719	0.140281
	4 cell(3, 1)	2934888	11397		2.11897e+06	0.94962	0.0503795
	4 cell(4, 1)	2737415	11397		1.92149e+06	0.861122	0.138878
	4 cell(5, 1)	2625476	11484		1.80333e+06	0.808165	0.191835
	4 cell(6, 1)	2428635	11397		1.61271e+06	0.722742	0.277258
	4 cell(7, 1)	2205649	11397		1.38973e+06	0.62281	0.37719
	4 cell(8, 1)	1938373	11397		1.12245e+06	0.503029	0.496971
	4 cell(9, 1)	1929004	11397		1.11308e+06	0.498831	0.501169
	4 cell(10, 1)	1450800	11397		634878	0.284522	0.715478
10 bp	5 cell(1, 1)	3272680	18612		1.94023e+06	1	0
	5 cell(2, 1)	3126770	18753		1.78422e+06	0.919595	0.0804051
	5 cell(3, 1)	3103857	18612		1.77141e+06	0.912988	0.0870119
	5 cell(4, 1)	3001020	18612		1.66857e+06	0.859986	0.140014
	5 cell(5, 1)	3007947	18753		1.6654e+06	0.858353	0.141647
	5 cell(6, 1)	2785362	18612		1.45291e+06	0.748835	0.251165
	5 cell(7, 1)	2783507	18612		1.45106e+06	0.747879	0.252121
	5 cell(8, 1)	2803337	18612		1.47089e+06	0.758099	0.241901
	5 cell(9, 1)	2966081	18753		1.62354e+06	0.836775	0.163225
	5 cell(10, 1)	2836035	18612		1.50358e+06	0.774952	0.225048
Background	6	898896	12556		0
