# Supplementary material for: A novel single alpha-helix DNA-binding domain in CAF-1 promotes gene silencing and DNA damage survival through tetrasome-length DNA selectivity and spacer function
Source: eLife journal article supplement (doi:10.7554/elife.83538), 2023-06-14
Supplement: fig4-data1 [file 220119 Cy5 ladder EMSA with yCAF1 WT_n2_Table.xlsx]

## Sheet: 220119 Cy5 ladder EMSA with yCA
	Name	Volume	Background	Background Level	Background Type	Median Intensity	Average Intensity	Mode Intensity	Std Dev	Variance	Min Intensity	Max Intensity	Percent	Area > Background	Centre X	Centre Y	Width	Height	Area	Comment
	1 cell(1, 1)	2250125	0	0	None	343.5	352.46	123	183.99	33851.1	818	71	2.49	6384	525	1343	133	48	6384
	1 cell(2, 1)	1815019	0	0	None	270	284.31	104	138.62	19215.2	603	66	2.01	6384	658	1343	133	48	6384
	1 cell(3, 1)	1247395	0	0	None	172	195.39	121	80.35	6455.38	397	71	1.38	6384	791	1343	133	48	6384
	1 cell(4, 1)	989998	0	0	None	142	155.07	123	54.99	3023.36	314	59	1.1	6384	924	1343	133	48	6384
	1 cell(5, 1)	726763	0	0	None	111	113.84	99	22.8	519.66	184	62	0.8	6384	1057	1343	133	48	6384
	1 cell(6, 1)	722405	0	0	None	112	114.02	114	24.28	589.54	180	56	0.8	6336	1190	1343	132	48	6336
	1 cell(7, 1)	679962	0	0	None	103	106.51	98	20.15	405.95	181	59	0.75	6384	1322	1343	133	48	6384
	1 cell(8, 1)	622888	0	0	None	97	97.57	94	15.63	244.17	150	50	0.69	6384	1455	1343	133	48	6384
	1 cell(9, 1)	619338	0	0	None	97	97.01	100	15.16	229.91	144	53	0.69	6384	1588	1343	133	48	6384
	1 cell(10, 1)	594809	0	0	None	93	93.17	92	12.11	146.71	134	51	0.66	6384	1721	1343	133	48	6384
	2 cell(1, 1)	2247803	0	0	None	376	396.44	93	200.37	40146.3	826	64	2.49	5670	517	1396	135	42	5670
	2 cell(2, 1)	2039443	0	0	None	338	353.95	110	160.85	25871.5	692	83	2.26	5762	652	1396	134	43	5762
	2 cell(3, 1)	1553135	0	0	None	254	267.55	224	109.63	12018.2	503	86	1.72	5805	786	1396	135	43	5805
	2 cell(4, 1)	1339252	0	0	None	214	230.71	165	101.41	10283.7	503	74	1.48	5805	921	1396	135	43	5805
	2 cell(5, 1)	883478	0	0	None	147	148.73	146	36.93	1363.83	244	71	0.98	5940	1056	1397	135	44	5940
	2 cell(6, 1)	777670	0	0	None	134	131.9	126	26.31	692.44	208	64	0.86	5896	1191	1397	134	44	5896
	2 cell(7, 1)	691651	0	0	None	119	116.44	124	20.85	434.79	171	55	0.77	5940	1325	1397	135	44	5940
	2 cell(8, 1)	608935	0	0	None	104	102.51	107	16.37	267.83	147	54	0.67	5940	1460	1397	135	44	5940
	2 cell(9, 1)	621257	0	0	None	104	103.03	107	17.84	318.36	189	45	0.69	6030	1595	1397	134	45	6030
	2 cell(10, 1)	585610	0	0	None	98	96.4	100	14.73	216.85	209	46	0.65	6075	1729	1397	135	45	6075
	3 cell(1, 1)	1800459	0	0	None	208	235.72	177	103.44	10699.2	509	55	1.99	7638	520	1445	134	57	7638
	3 cell(2, 1)	1803347	0	0	None	215	236.1	176	90.68	8222	461	84	2	7638	654	1445	134	57	7638
	3 cell(3, 1)	1747786	0	0	None	207	228.83	159	90.76	8236.79	463	80	1.93	7638	788	1445	134	57	7638
	3 cell(4, 1)	1611072	0	0	None	190	210.93	109	87.26	7614.89	429	68	1.78	7638	922	1445	134	57	7638
	3 cell(5, 1)	1307461	0	0	None	156	169.91	156	63.26	4002.11	334	67	1.45	7695	1056	1445	135	57	7695
	3 cell(6, 1)	1239070	0	0	None	151	162.22	147	55.14	3040.1	303	68	1.37	7638	1191	1445	134	57	7638
	3 cell(7, 1)	1093808	0	0	None	136	143.21	132	44.58	1987.24	268	59	1.21	7638	1325	1445	134	57	7638
	3 cell(8, 1)	981536	0	0	None	123	128.51	111	36.17	1308.42	228	54	1.09	7638	1459	1445	134	57	7638
	3 cell(9, 1)	945068	0	0	None	121	123.73	122	33.3	1108.69	224	45	1.05	7638	1593	1445	134	57	7638
	3 cell(10, 1)	844871	0	0	None	109	110.61	114	57.84	3345.82	1542	49	0.93	7638	1727	1445	134	57	7638
	4 cell(1, 1)	3219661	0	0	None	160	235.56	114	190.69	36360.9	920	52	3.56	13668	520	1525	134	102	13668
	4 cell(2, 1)	3182360	0	0	None	165	234.58	114	169.71	28800.2	823	67	3.52	13566	653	1525	133	102	13566
	4 cell(3, 1)	3124184	0	0	None	152	228.58	110	171.86	29534.4	798	66	3.46	13668	787	1525	134	102	13668
	4 cell(4, 1)	3063775	0	0	None	142	225.84	105	179.54	32234.1	842	70	3.39	13566	920	1525	133	102	13566
	4 cell(5, 1)	2714504	0	0	None	130	198.6	101	144.73	20948.1	685	67	3	13668	1054	1525	134	102	13668
	4 cell(6, 1)	2728162	0	0	None	132	201.1	102	150.23	22569.1	682	52	3.02	13566	1187	1525	133	102	13566
	4 cell(7, 1)	2450368	0	0	None	125	180.61	102	123.84	15336.5	598	59	2.71	13567	1321	1525	134	102	13567
	4 cell(8, 1)	2218389	0	0	None	115	163.53	105	111.83	12507	570	53	2.46	13566	1454	1525	134	102	13566
	4 cell(9, 1)	2117495	0	0	None	113	154.92	92	100.42	10083.8	542	55	2.34	13668	1588	1525	134	102	13668
	4 cell(10, 1)	1743786	0	0	None	102	128.54	91	80.75	6520.48	1875	51	1.93	13566	1721	1525	133	102	13566
	5 cell(1, 1)	3021978	0	0	None	118	170.85	102	124.39	15472.6	693	56	3.34	17688	529	1652	135	135	17688
	5 cell(2, 1)	2974031	0	0	None	121	169.43	93	109.77	12049.2	548	55	3.29	17553	661	1652	134	135	17553
	5 cell(3, 1)	2993120	0	0	None	120	169.22	87	115.82	13414.8	578	57	3.31	17688	792	1652	135	135	17688
	5 cell(4, 1)	2920714	0	0	None	115	165.12	86	116.83	13648.5	574	47	3.23	17688	924	1652	135	135	17688
	5 cell(5, 1)	2677227	0	0	None	108	151.36	90	95.42	9105.9	464	54	2.96	17688	1056	1652	135	135	17688
	5 cell(6, 1)	2741309	0	0	None	107	156.17	85	109.71	12035.9	527	51	3.03	17553	1188	1652	134	135	17553
	5 cell(7, 1)	2592249	0	0	None	103	146.55	83	96.7	9350.55	488	40	2.87	17688	1319	1652	135	135	17688
	5 cell(8, 1)	2658916	0	0	None	103	150.32	79	105.18	11061.9	510	51	2.94	17688	1451	1652	135	135	17688
	5 cell(9, 1)	2655608	0	0	None	102	151.29	83	104.98	11020.1	526	47	2.94	17553	1583	1652	134	135	17553
	5 cell(10, 1)	2711719	0	0	None	97	153.31	79	129.24	16704	728	46	3	17688	1714	1652	135	135	17688
	6	860993	0	0	None	71	71.18	70	8.23	67.66	109	33	0.95	12096	525	1078	126	96	12096

## Sheet: App Fract Bound
		Volume	Area		Minus Backg.	Normalization	Bound apparent
50bp	1 cell(1, 1)	2250125	6384		1.79571e+06	1	0
	1 cell(2, 1)	1815019	6384		1.36061e+06	0.757697	0.242303
	1 cell(3, 1)	1247395	6384		792982	0.441598	0.558402
	1 cell(4, 1)	989998	6384		535585	0.298258	0.701742
	1 cell(5, 1)	726763	6384		272350	0.151667	0.848333
	1 cell(6, 1)	722405	6336		271409	0.151143	0.848857
	1 cell(7, 1)	679962	6384		225549	0.125604	0.874396
	1 cell(8, 1)	622888	6384		168475	0.0938207	0.906179
	1 cell(9, 1)	619338	6384		164925	0.0918438	0.908156
	1 cell(10, 1)	594809	6384		140396	0.078184	0.921816
40bp	2 cell(1, 1)	2247803	5670		1.84421e+06	1	0
	2 cell(2, 1)	2039443	5762		1.6293e+06	0.883469	0.116531
	2 cell(3, 1)	1553135	5805		1.13994e+06	0.618115	0.381885
	2 cell(4, 1)	1339252	5805		926052	0.50214	0.49786
	2 cell(5, 1)	883478	5940		460669	0.249792	0.750208
	2 cell(6, 1)	777670	5896		357993	0.194117	0.805883
	2 cell(7, 1)	691651	5940		268842	0.145776	0.854224
	2 cell(8, 1)	608935	5940		186126	0.100924	0.899076
	2 cell(9, 1)	621257	6030		192042	0.104132	0.895868
	2 cell(10, 1)	585610	6075		153192	0.0830662	0.916934
30 bp	3 cell(1, 1)	1800459	7638		1.25679e+06	0.997707	0.00229266
	3 cell(2, 1)	1803347	7638		1.25967e+06	1	0
	3 cell(3, 1)	1747786	7638		1.20411e+06	0.955893	0.0441074
	3 cell(4, 1)	1611072	7638		1.0674e+06	0.847361	0.152639
	3 cell(5, 1)	1307461	7695		759731	0.603117	0.396883
	3 cell(6, 1)	1239070	7638		695397	0.552045	0.447955
	3 cell(7, 1)	1093808	7638		550135	0.436728	0.563272
	3 cell(8, 1)	981536	7638		437863	0.3476	0.6524
	3 cell(9, 1)	945068	7638		401395	0.31865	0.68135
	3 cell(10, 1)	844871	7638		301198	0.239108	0.760892
20 bp	4 cell(1, 1)	3219661	13668		2.24677e+06	1	0
	4 cell(2, 1)	3182360	13566		2.21673e+06	0.986629	0.0133706
	4 cell(3, 1)	3124184	13668		2.1513e+06	0.957505	0.0424952
	4 cell(4, 1)	3063775	13566		2.09815e+06	0.933849	0.0661507
	4 cell(5, 1)	2714504	13668		1.74162e+06	0.775163	0.224837
	4 cell(6, 1)	2728162	13566		1.76253e+06	0.784474	0.215526
	4 cell(7, 1)	2450368	13567		1.48467e+06	0.660801	0.339199
	4 cell(8, 1)	2218389	13566		1.25276e+06	0.557583	0.442417
	4 cell(9, 1)	2117495	13668		1.14461e+06	0.509445	0.490555
	4 cell(10, 1)	1743786	13566		778158	0.346345	0.653655
10 bp	5 cell(1, 1)	3021978	17688		1.76295e+06	1	0
	5 cell(2, 1)	2974031	17553		1.72461e+06	0.978254	0.0217464
	5 cell(3, 1)	2993120	17688		1.73409e+06	0.983631	0.0163692
	5 cell(4, 1)	2920714	17688		1.66168e+06	0.94256	0.0574402
	5 cell(5, 1)	2677227	17688		1.4182e+06	0.804446	0.195554
	5 cell(6, 1)	2741309	17553		1.49189e+06	0.846246	0.153754
	5 cell(7, 1)	2592249	17688		1.33322e+06	0.756244	0.243756
	5 cell(8, 1)	2658916	17688		1.39988e+06	0.79406	0.20594
	5 cell(9, 1)	2655608	17553		1.40619e+06	0.797634	0.202366
	5 cell(10, 1)	2711719	17688		1.45269e+06	0.824011	0.175989
Background	6	860993	12096		0
