# Supplementary material for: A novel single alpha-helix DNA-binding domain in CAF-1 promotes gene silencing and DNA damage survival through tetrasome-length DNA selectivity and spacer function
Source: eLife journal article supplement (doi:10.7554/elife.83538), 2023-06-14
Supplement: fig4-data1 [file 220120 Cy5 ladder EMSA with yKER_n1_Table.xlsx]

## Sheet: 220120 Cy5 ladder EMSA with yKE
	Name	Volume	Background	Background Level	Background Type	Median Intensity	Average Intensity	Mode Intensity	Std Dev	Variance	Min Intensity	Max Intensity	Percent	Area > Background	Centre X	Centre Y	Width	Height	Area	Comment
	1 cell(1, 1)	1832593	0	0	None	525	569.84	84	362.02	131058	1439	69	2.86	3216	693	1349	134	24	3216
	1 cell(2, 1)	1271219	0	0	None	393	395.28	88	230.92	53325.4	955	66	1.99	3216	827	1349	134	24	3216
	1 cell(3, 1)	403866	0	0	None	125	124.65	126	29.1	847.04	210	61	0.63	3240	961	1349	135	24	3240
	1 cell(4, 1)	343586	0	0	None	108	106.84	109	19.19	368.19	162	59	0.54	3216	1096	1349	134	24	3216
	1 cell(5, 1)	313100	0	0	None	96	97.36	85	15.2	230.91	151	54	0.49	3216	1230	1349	134	24	3216
	1 cell(6, 1)	318361	0	0	None	99	98.99	103	17.44	304.08	147	51	0.5	3216	1364	1349	134	24	3216
	1 cell(7, 1)	310745	0	0	None	97	96.62	106	14.76	217.77	139	56	0.49	3216	1498	1349	134	24	3216
	1 cell(8, 1)	304671	0	0	None	94	94.03	91	15.31	234.41	154	48	0.48	3240	1632	1349	135	24	3240
	1 cell(9, 1)	315425	0	0	None	98	98.08	97	14.17	200.7	139	54	0.49	3216	1767	1349	134	24	3216
	1 cell(10, 1)	309832	0	0	None	97	96.34	96	16.49	271.87	151	49	0.48	3216	1901	1349	134	24	3216
	2 cell(1, 1)	2608497	0	0	None	605.5	617.25	104	307.35	94465.2	1282	66	4.08	4226	696	1380	135	32	4226
	2 cell(2, 1)	1880510	0	0	None	429	444.99	95	224.75	50514.3	1046	70	2.94	4226	829	1380	135	32	4226
	2 cell(3, 1)	623337	0	0	None	144	147.5	164	44.62	1990.58	299	59	0.97	4226	962	1380	135	32	4226
	2 cell(4, 1)	506629	0	0	None	121	119.88	130	23.96	574.05	186	57	0.79	4226	1095	1380	135	32	4226
	2 cell(5, 1)	456710	0	0	None	108	108.07	101	18.88	356.6	168	60	0.71	4226	1228	1380	135	32	4226
	2 cell(6, 1)	477874	0	0	None	115	113.08	120	21.12	445.95	170	51	0.75	4226	1361	1380	135	32	4226
	2 cell(7, 1)	439656	0	0	None	105	104.04	104	17.46	304.94	189	55	0.69	4226	1494	1380	135	32	4226
	2 cell(8, 1)	438933	0	0	None	104	103.86	113	18.55	344.16	165	46	0.69	4226	1627	1380	135	32	4226
	2 cell(9, 1)	430812	0	0	None	102	101.94	101	16.48	271.56	152	51	0.67	4226	1760	1380	135	32	4226
	2 cell(10, 1)	426472	0	0	None	102	100.92	103	16.44	270.21	150	46	0.67	4226	1893	1380	135	32	4226
	3 cell(1, 1)	1855622	0	0	None	318	351.44	273	171.13	29284.6	841	72	2.9	5280	699	1420	132	40	5280
	3 cell(2, 1)	1701552	0	0	None	291	322.26	98	166	27557.2	811	71	2.66	5280	831	1420	132	40	5280
	3 cell(3, 1)	1124064	0	0	None	198	214.52	150	94.33	8898.09	541	62	1.76	5240	962	1420	131	40	5240
	3 cell(4, 1)	750367	0	0	None	140	142.11	130	36.64	1342.13	231	52	1.17	5280	1094	1420	132	40	5280
	3 cell(5, 1)	657891	0	0	None	124	124.6	125	27.39	750.14	204	59	1.03	5280	1226	1420	132	40	5280
	3 cell(6, 1)	667275	0	0	None	126	126.38	112	28.4	806.54	206	55	1.04	5280	1358	1420	132	40	5280
	3 cell(7, 1)	576401	0	0	None	110	109.17	117	19.84	393.67	167	51	0.9	5280	1490	1420	132	40	5280
	3 cell(8, 1)	583442	0	0	None	111	111.34	118	21.11	445.61	179	62	0.91	5240	1621	1419	131	41	5240
	3 cell(9, 1)	554890	0	0	None	104	105.09	100	18.71	349.98	157	56	0.87	5280	1753	1419	132	40	5280
	3 cell(10, 1)	537868	0	0	None	103	101.87	101	16.33	266.6	151	51	0.84	5280	1885	1418	132	41	5280
	4 cell(1, 1)	2415427	0	0	None	321.5	422.13	86	303.7	92234.2	1248	60	3.77	5722	693	1464	133	44	5722
	4 cell(2, 1)	2304496	0	0	None	305	402.74	115	286.54	82104.3	1226	76	3.6	5722	824	1464	133	44	5722
	4 cell(3, 1)	2224231	0	0	None	282	388.72	121	296.27	87775.3	1281	73	3.48	5722	955	1464	133	44	5722
	4 cell(4, 1)	1579440	0	0	None	200	276.03	91	189.76	36007.4	817	74	2.47	5722	1086	1464	133	44	5722
	4 cell(5, 1)	1269661	0	0	None	161	221.89	119	139.97	19591.5	643	71	1.98	5722	1217	1464	133	44	5722
	4 cell(6, 1)	1193615	0	0	None	163.5	208.6	126	113.37	12851.9	501	63	1.87	5722	1348	1464	133	44	5722
	4 cell(7, 1)	914908	0	0	None	130	159.89	107	80.3	6447.9	430	63	1.43	5722	1479	1464	133	44	5722
	4 cell(8, 1)	908166	0	0	None	132	158.71	100	76.37	5832.83	426	53	1.42	5722	1610	1464	133	44	5722
	4 cell(9, 1)	801730	0	0	None	124.5	140.11	103	52.89	2797.29	308	54	1.25	5722	1741	1464	133	44	5722
	4 cell(10, 1)	692832	0	0	None	115	121.08	102	37.5	1406.14	794	53	1.08	5722	1872	1464	133	44	5722
	5 cell(1, 1)	2803633	0	0	None	150	229.43	103	184.6	34078.6	910	57	4.38	12220	704	1535	130	94	12220
	5 cell(2, 1)	2637663	0	0	None	145	217.52	89	169.53	28738.8	848	50	4.12	12126	833	1535	129	94	12126
	5 cell(3, 1)	2714869	0	0	None	140	222.17	83	185.27	34325	887	50	4.24	12220	963	1535	130	94	12220
	5 cell(4, 1)	2738468	0	0	None	142	225.83	107	188.1	35380.9	850	54	4.28	12126	1092	1535	129	94	12126
	5 cell(5, 1)	2725340	0	0	None	138	223.02	98	190.22	36182.2	863	47	4.26	12220	1222	1535	130	94	12220
	5 cell(6, 1)	2668248	0	0	None	137	218.35	85	184	33857.8	880	55	4.17	12220	1352	1535	130	94	12220
	5 cell(7, 1)	2467914	0	0	None	121	203.52	85	177.56	31528.2	819	47	3.86	12126	1481	1535	129	94	12126
	5 cell(8, 1)	2478620	0	0	None	121	202.83	76	172.08	29610.4	798	50	3.87	12220	1611	1534	130	95	12220
	5 cell(9, 1)	2499845	0	0	None	119	206.16	78	183.11	33529.4	834	47	3.91	12126	1740	1534	129	94	12126
	5 cell(10, 1)	2250661	0	0	None	109	184.18	77	171.84	29528.5	914	52	3.52	12220	1870	1533	130	95	12220
	6	678764	0	0	None	70	70.35	68	8.19	67.06	192	41	1.06	9648	680	1084	134	72	9648

## Sheet: App Fract Bound
		Volume	Area		Minus Backg.	Normalization	Bound apparent
50bp	1 cell(1, 1)	1832593	3216		1.60634e+06	1	0
	1 cell(2, 1)	1271219	3216		1.04496e+06	0.650526	0.349474
	1 cell(3, 1)	403866	3240		175923	0.109518	0.890482
	1 cell(4, 1)	343586	3216		117331	0.0730427	0.926957
	1 cell(5, 1)	313100	3216		86845.3	0.0540642	0.945936
	1 cell(6, 1)	318361	3216		92106.3	0.0573393	0.942661
	1 cell(7, 1)	310745	3216		84490.3	0.0525981	0.947402
	1 cell(8, 1)	304671	3240		76727.9	0.0477657	0.952234
	1 cell(9, 1)	315425	3216		89170.3	0.0555116	0.944488
	1 cell(10, 1)	309832	3216		83577.3	0.0520297	0.94797
40bp	2 cell(1, 1)	2608497	4226		2.31119e+06	1	0
	2 cell(2, 1)	1880510	4226		1.5832e+06	0.685016	0.314984
	2 cell(3, 1)	623337	4226		326026	0.141064	0.858936
	2 cell(4, 1)	506629	4226		209318	0.0905673	0.909433
	2 cell(5, 1)	456710	4226		159399	0.0689685	0.931032
	2 cell(6, 1)	477874	4226		180563	0.0781257	0.921874
	2 cell(7, 1)	439656	4226		142345	0.0615896	0.93841
	2 cell(8, 1)	438933	4226		141622	0.0612768	0.938723
	2 cell(9, 1)	430812	4226		133501	0.057763	0.942237
	2 cell(10, 1)	426472	4226		129161	0.0558852	0.944115
30 bp	3 cell(1, 1)	1855622	5280		1.48416e+06	1	0
	3 cell(2, 1)	1701552	5280		1.33009e+06	0.89619	0.10381
	3 cell(3, 1)	1124064	5240		755415	0.508985	0.491015
	3 cell(4, 1)	750367	5280		378904	0.255299	0.744701
	3 cell(5, 1)	657891	5280		286428	0.19299	0.80701
	3 cell(6, 1)	667275	5280		295812	0.199313	0.800687
	3 cell(7, 1)	576401	5280		204938	0.138084	0.861916
	3 cell(8, 1)	583442	5240		214793	0.144724	0.855276
	3 cell(9, 1)	554890	5280		183427	0.12359	0.87641
	3 cell(10, 1)	537868	5280		166405	0.112121	0.887879
20 bp	4 cell(1, 1)	2415427	5722		2.01287e+06	1	0
	4 cell(2, 1)	2304496	5722		1.90194e+06	0.944889	0.0551109
	4 cell(3, 1)	2224231	5722		1.82167e+06	0.905013	0.0949868
	4 cell(4, 1)	1579440	5722		1.17688e+06	0.584679	0.415321
	4 cell(5, 1)	1269661	5722		867102	0.430779	0.569221
	4 cell(6, 1)	1193615	5722		791056	0.392999	0.607001
	4 cell(7, 1)	914908	5722		512349	0.254537	0.745463
	4 cell(8, 1)	908166	5722		505607	0.251187	0.748813
	4 cell(9, 1)	801730	5722		399171	0.19831	0.80169
	4 cell(10, 1)	692832	5722		290273	0.144209	0.855791
10 bp	5 cell(1, 1)	2803633	12220		1.94392e+06	1	0
	5 cell(2, 1)	2637663	12126		1.78456e+06	0.918023	0.081977
	5 cell(3, 1)	2714869	12220		1.85516e+06	0.954338	0.0456623
	5 cell(4, 1)	2738468	12126		1.88537e+06	0.96988	0.0301205
	5 cell(5, 1)	2725340	12220		1.86563e+06	0.959724	0.0402758
	5 cell(6, 1)	2668248	12220		1.80854e+06	0.930355	0.0696453
	5 cell(7, 1)	2467914	12126		1.61482e+06	0.8307	0.1693
	5 cell(8, 1)	2478620	12220		1.61891e+06	0.832805	0.167195
	5 cell(9, 1)	2499845	12126		1.64675e+06	0.847126	0.152874
	5 cell(10, 1)	2250661	12220		1.39095e+06	0.715538	0.284462
Background	6	678764	9648		0
