# Supplementary material for: A novel single alpha-helix DNA-binding domain in CAF-1 promotes gene silencing and DNA damage survival through tetrasome-length DNA selectivity and spacer function
Source: eLife journal article supplement (doi:10.7554/elife.83538), 2023-06-14
Supplement: fig4-data1 [file 220120 Cy5 ladder EMSA with yKER_n2_Table.xlsx]

## Sheet: 220120 Cy5 ladder EMSA with yKE
	Name	Volume	Background	Background Level	Background Type	Median Intensity	Average Intensity	Mode Intensity	Std Dev	Variance	Min Intensity	Max Intensity	Percent	Area > Background	Centre X	Centre Y	Width	Height	Area	Comment
	1 cell(1, 1)	2129739	0	0	None	585	580.63	100	345.26	119206	1433	67	3.44	3668	578	1382	131	28	3668
	1 cell(2, 1)	1587698	0	0	None	440	429.57	86	234.09	54796.5	1015	71	2.57	3696	710	1382	132	28	3696
	1 cell(3, 1)	511232	0	0	None	128	139.38	125	84.15	7080.96	1163	69	0.83	3668	841	1382	131	28	3668
	1 cell(4, 1)	422860	0	0	None	115	114.41	117	21.13	446.47	264	61	0.68	3696	973	1382	132	28	3696
	1 cell(5, 1)	381834	0	0	None	105	104.1	101	13.62	185.42	140	55	0.62	3668	1104	1382	131	28	3668
	1 cell(6, 1)	381170	0	0	None	105	103.92	105	14.73	217.01	162	61	0.62	3668	1235	1382	131	28	3668
	1 cell(7, 1)	357899	0	0	None	97	96.83	103	13.31	177.12	139	56	0.58	3696	1367	1382	132	28	3696
	1 cell(8, 1)	365889	0	0	None	100	99.75	98	16.1	259.09	145	52	0.59	3668	1498	1382	131	28	3668
	1 cell(9, 1)	359285	0	0	None	97	97.21	104	15.07	227.11	145	55	0.58	3696	1630	1382	132	28	3696
	1 cell(10, 1)	336009	0	0	None	92	91.61	91	13.17	173.49	135	52	0.54	3668	1761	1382	131	28	3668
	2 cell(1, 1)	2088201	0	0	None	615.5	613.09	111	322.09	103744	1304	72	3.38	3406	579	1411	131	26	3406
	2 cell(2, 1)	1746989	0	0	None	522.5	509.03	98	259.44	67306.6	1073	76	2.83	3432	711	1411	132	27	3432
	2 cell(3, 1)	527895	0	0	None	152	154.99	156	44.95	2020.12	282	59	0.85	3406	842	1412	131	26	3406
	2 cell(4, 1)	440647	0	0	None	129	128.39	129	26.33	693.26	203	67	0.71	3432	974	1412	132	27	3432
	2 cell(5, 1)	400279	0	0	None	119	117.52	116	17.66	312.01	168	66	0.65	3406	1105	1413	131	26	3406
	2 cell(6, 1)	396915	0	0	None	119	116.53	127	18.18	330.62	163	64	0.64	3406	1236	1413	131	26	3406
	2 cell(7, 1)	359638	0	0	None	106	104.79	103	15.39	236.79	144	57	0.58	3432	1368	1413	132	27	3432
	2 cell(8, 1)	357902	0	0	None	106	105.08	108	16.29	265.23	149	57	0.58	3406	1499	1414	131	26	3406
	2 cell(9, 1)	359196	0	0	None	107	104.66	107	18.02	324.73	154	52	0.58	3432	1631	1414	132	27	3432
	2 cell(10, 1)	335504	0	0	None	99	98.5	96	15.42	237.74	148	50	0.54	3406	1762	1415	131	26	3406
	3 cell(1, 1)	1778073	0	0	None	310.5	341.81	109	167.66	28110.6	777	93	2.88	5202	585	1452	133	40	5202
	3 cell(2, 1)	1792640	0	0	None	310	344.61	212	173.28	30027.2	848	88	2.9	5202	716	1452	133	40	5202
	3 cell(3, 1)	1209745	0	0	None	220	234.36	158	97.32	9470.76	477	61	1.96	5162	847	1452	132	40	5162
	3 cell(4, 1)	781381	0	0	None	149	150.21	131	38.56	1486.83	250	63	1.26	5202	977	1452	133	40	5202
	3 cell(5, 1)	688868	0	0	None	134	132.42	144	24.25	587.92	187	66	1.11	5202	1108	1452	133	40	5202
	3 cell(6, 1)	677733	0	0	None	130	130.28	122	23.26	540.96	199	72	1.1	5202	1239	1452	133	40	5202
	3 cell(7, 1)	582138	0	0	None	112	111.91	121	17.84	318.14	164	58	0.94	5202	1370	1452	133	40	5202
	3 cell(8, 1)	571566	0	0	None	111	110.73	124	19.22	369.39	161	55	0.92	5162	1501	1452	132	40	5162
	3 cell(9, 1)	568949	0	0	None	109	109.37	108	20.16	406.35	176	58	0.92	5202	1631	1452	133	40	5202
	3 cell(10, 1)	535535	0	0	None	102	102.95	102	16.33	266.66	157	54	0.87	5202	1762	1452	133	40	5202
	4 cell(1, 1)	2597263	0	0	None	228	399.46	162	339.04	114946	1506	72	4.2	6502	583	1497	133	50	6502
	4 cell(2, 1)	2654740	0	0	None	241	408.3	146	343.79	118191	1580	88	4.29	6502	714	1497	133	50	6502
	4 cell(3, 1)	2480377	0	0	None	231	378.57	143	305.74	93476.9	1346	75	4.01	6552	846	1497	134	50	6552
	4 cell(4, 1)	1705279	0	0	None	188	262.27	130	177.65	31560	760	74	2.76	6502	977	1497	133	50	6502
	4 cell(5, 1)	1288429	0	0	None	158	198.16	139	105.56	11143	509	71	2.08	6502	1108	1497	133	50	6502
	4 cell(6, 1)	1363643	0	0	None	160	209.73	117	116.05	13467.7	521	63	2.21	6502	1239	1497	133	50	6502
	4 cell(7, 1)	967154	0	0	None	126	148.75	101	63.17	3989.83	356	68	1.56	6502	1370	1497	133	50	6502
	4 cell(8, 1)	945233	0	0	None	125	144.27	105	58.47	3418.16	339	62	1.53	6552	1502	1497	134	50	6552
	4 cell(9, 1)	908000	0	0	None	124	139.65	129	54.89	3012.48	330	56	1.47	6502	1633	1497	133	50	6502
	4 cell(10, 1)	778092	0	0	None	112	119.67	95	32.78	1074.52	230	55	1.26	6502	1764	1497	133	50	6502
	5 cell(1, 1)	2407629	0	0	None	162	284.99	95	273.64	74877.7	1325	60	3.89	8448	579	1552	132	64	8448
	5 cell(2, 1)	2464075	0	0	None	163	291.68	94	275.08	75671.1	1287	56	3.98	8448	711	1552	132	64	8448
	5 cell(3, 1)	2331744	0	0	None	159	278.12	82	251.17	63086.4	1115	57	3.77	8384	842	1552	131	65	8384
	5 cell(4, 1)	2259113	0	0	None	182	267.41	88	198.75	39500.7	856	58	3.65	8448	974	1553	132	64	8448
	5 cell(5, 1)	2194861	0	0	None	181	259.81	125	179.79	32325.8	768	64	3.55	8448	1106	1553	132	64	8448
	5 cell(6, 1)	2289204	0	0	None	181	270.98	115	194.14	37688.7	825	62	3.7	8448	1238	1553	132	64	8448
	5 cell(7, 1)	2199136	0	0	None	165	260.31	99	199.03	39614.3	842	48	3.56	8448	1370	1553	132	64	8448
	5 cell(8, 1)	2166381	0	0	None	165	258.39	90	197.96	39187.9	825	55	3.5	8384	1501	1553	131	65	8384
	5 cell(9, 1)	2211366	0	0	None	144	261.76	90	246.25	60638.2	1133	58	3.58	8448	1633	1554	132	64	8448
	5 cell(10, 1)	2095435	0	0	None	130	248.04	77	256.83	65959.2	1235	51	3.39	8448	1765	1554	132	64	8448
	6	496074	0	0	None	71	71.44	71	8.21	67.46	113	34	0.8	6944	575	1150	124	56	6944

## Sheet: Sheet1
		Volume	Area		Minus Backg.	Normalization	Bound apparent
50bp	1 cell(1, 1)	2129739	3668		1.8677e+06	1	0
	1 cell(2, 1)	1587698	3696		1.32366e+06	0.708711	0.291289
	1 cell(3, 1)	511232	3668		249193	0.133422	0.866578
	1 cell(4, 1)	422860	3696		158821	0.0850354	0.914965
	1 cell(5, 1)	381834	3668		119795	0.0641403	0.93586
	1 cell(6, 1)	381170	3668		119131	0.0637848	0.936215
	1 cell(7, 1)	357899	3696		93859.6	0.0502541	0.949746
	1 cell(8, 1)	365889	3668		103850	0.0556031	0.944397
	1 cell(9, 1)	359285	3696		95245.6	0.0509962	0.949004
	1 cell(10, 1)	336009	3668		73969.9	0.0396048	0.960395
40bp	2 cell(1, 1)	2088201	3406		1.84488e+06	1	0
	2 cell(2, 1)	1746989	3432		1.50181e+06	0.814042	0.185958
	2 cell(3, 1)	527895	3406		284573	0.15425	0.84575
	2 cell(4, 1)	440647	3432		195468	0.105951	0.894049
	2 cell(5, 1)	400279	3406		156957	0.0850771	0.914923
	2 cell(6, 1)	396915	3406		153593	0.0832537	0.916746
	2 cell(7, 1)	359638	3432		114459	0.0620412	0.937959
	2 cell(8, 1)	357902	3406		114580	0.062107	0.937893
	2 cell(9, 1)	359196	3432		114017	0.0618017	0.938198
	2 cell(10, 1)	335504	3406		92182	0.0499664	0.950034
30 bp	3 cell(1, 1)	1778073	5202		1.40645e+06	0.989749	0.0102511
	3 cell(2, 1)	1792640	5202		1.42101e+06	1	0
	3 cell(3, 1)	1209745	5162		840976	0.591814	0.408186
	3 cell(4, 1)	781381	5202		409754	0.288354	0.711646
	3 cell(5, 1)	688868	5202		317241	0.22325	0.77675
	3 cell(6, 1)	677733	5202		306106	0.215414	0.784586
	3 cell(7, 1)	582138	5202		210511	0.148142	0.851858
	3 cell(8, 1)	571566	5162		202797	0.142713	0.857287
	3 cell(9, 1)	568949	5202		197322	0.13886	0.86114
	3 cell(10, 1)	535535	5202		163908	0.115346	0.884654
20 bp	4 cell(1, 1)	2597263	6502		2.13277e+06	0.973758	0.0262423
	4 cell(2, 1)	2654740	6502		2.19024e+06	1	0
	4 cell(3, 1)	2480377	6552		2.01231e+06	0.91876	0.0812399
	4 cell(4, 1)	1705279	6502		1.24078e+06	0.566504	0.433496
	4 cell(5, 1)	1288429	6502		823931	0.376183	0.623817
	4 cell(6, 1)	1363643	6502		899145	0.410523	0.589477
	4 cell(7, 1)	967154	6502		502656	0.229498	0.770502
	4 cell(8, 1)	945233	6552		477163	0.217859	0.782141
	4 cell(9, 1)	908000	6502		443502	0.20249	0.79751
	4 cell(10, 1)	778092	6502		313594	0.143178	0.856822
10 bp	5 cell(1, 1)	2407629	8448		1.80411e+06	0.969662	0.0303382
	5 cell(2, 1)	2464075	8448		1.86056e+06	1	0
	5 cell(3, 1)	2331744	8384		1.7328e+06	0.931333	0.068667
	5 cell(4, 1)	2259113	8448		1.65559e+06	0.889838	0.110162
	5 cell(5, 1)	2194861	8448		1.59134e+06	0.855305	0.144695
	5 cell(6, 1)	2289204	8448		1.68569e+06	0.906011	0.0939886
	5 cell(7, 1)	2199136	8448		1.59562e+06	0.857602	0.142398
	5 cell(8, 1)	2166381	8384		1.56743e+06	0.842455	0.157545
	5 cell(9, 1)	2211366	8448		1.60785e+06	0.864176	0.135824
	5 cell(10, 1)	2095435	8448		1.49192e+06	0.801866	0.198134
Background	6	496074	6944		0
