# Supplementary material for: A novel single alpha-helix DNA-binding domain in CAF-1 promotes gene silencing and DNA damage survival through tetrasome-length DNA selectivity and spacer function
Source: eLife journal article supplement (doi:10.7554/elife.83538), 2023-06-14
Supplement: fig4-data1 [file 220124 Cy5 Ladder EMSA with yCAF1 delta WHD_n1_Table.xlsx]

## Sheet: 220124 Cy5 Ladder EMSA with yCA
	Name	Volume	Background	Background Level	Background Type	Median Intensity	Average Intensity	Mode Intensity	Std Dev	Variance	Min Intensity	Max Intensity	Percent	Area > Background	Centre X	Centre Y	Width	Height	Area	Comment
	1 cell(1, 1)	3312809	0	0	None	296	337.18	91	217.16	47157	980	51	3.07	9825	617	1523	131	76	9825
	1 cell(2, 1)	2894521	0	0	None	258	294.61	98	181.98	33116.7	867	62	2.68	9825	748	1524	131	76	9825
	1 cell(3, 1)	1825201	0	0	None	153	185.75	104	94.69	8965.66	480	60	1.69	9826	879	1525	131	77	9826
	1 cell(4, 1)	1604854	0	0	None	138	163.34	112	71.12	5057.48	353	57	1.49	9825	1010	1527	131	76	9825
	1 cell(5, 1)	1237960	0	0	None	115	125.05	92	37.11	1377.4	239	53	1.15	9900	1142	1528	132	76	9900
	1 cell(6, 1)	1075840	0	0	None	106	109.5	91	26.47	700.64	220	56	1	9825	1273	1529	131	76	9825
	1 cell(7, 1)	1063817	0	0	None	105	108.28	92	27.51	756.92	231	49	0.99	9825	1404	1530	131	76	9825
	1 cell(8, 1)	944625	0	0	None	91	96.14	85	22.38	501.04	323	49	0.88	9826	1535	1531	131	77	9826
	1 cell(9, 1)	947651	0	0	None	90	96.45	80	23.05	531.21	192	49	0.88	9825	1666	1533	131	76	9825
	1 cell(10, 1)	928863	0	0	None	90	94.54	85	20.26	410.63	166	45	0.86	9825	1797	1534	131	76	9825
	2 cell(1, 1)	2673284	0	0	None	362	397.1	100	212.93	45337.1	943	63	2.48	6732	609	1586	132	53	6732
	2 cell(2, 1)	2469977	0	0	None	336.5	366.9	198	195.25	38121.3	862	59	2.29	6732	741	1588	132	53	6732
	2 cell(3, 1)	1985223	0	0	None	263.5	294.89	87	150.92	22777.7	665	65	1.84	6732	873	1590	132	52	6732
	2 cell(4, 1)	1795681	0	0	None	236	266.74	90	131.17	17205.6	572	64	1.67	6732	1005	1591	132	53	6732
	2 cell(5, 1)	1413186	0	0	None	194	209.92	141	88.46	7825.22	426	55	1.31	6732	1137	1593	132	53	6732
	2 cell(6, 1)	1179298	0	0	None	168	175.18	115	63.36	4015.08	337	62	1.09	6732	1269	1595	132	53	6732
	2 cell(7, 1)	1186580	0	0	None	168	176.26	129	67.1	4502.7	343	56	1.1	6732	1401	1597	132	53	6732
	2 cell(8, 1)	933213	0	0	None	130	138.62	112	52.29	2733.91	449	56	0.87	6732	1533	1599	132	52	6732
	2 cell(9, 1)	875161	0	0	None	125	130	126	36.09	1302.26	251	52	0.81	6732	1665	1600	132	53	6732
	2 cell(10, 1)	833513	0	0	None	125	123.81	127	27.45	753.59	210	54	0.77	6732	1797	1602	132	53	6732
	3 cell(1, 1)	2152658	0	0	None	206	245.21	160	130.94	17144.8	985	58	2	8779	603	1648	133	68	8779
	3 cell(2, 1)	2076254	0	0	None	203	238.32	142	116.58	13590.6	590	66	1.93	8712	736	1650	132	68	8712
	3 cell(3, 1)	2029963	0	0	None	193	231.26	150	112.3	12611.7	560	69	1.88	8778	868	1651	133	67	8778
	3 cell(4, 1)	1996677	0	0	None	191	229.19	148	112.2	12589.5	546	62	1.85	8712	1001	1653	132	68	8712
	3 cell(5, 1)	1927135	0	0	None	182	219.52	130	110.96	12311.7	522	65	1.79	8779	1133	1655	133	68	8779
	3 cell(6, 1)	1845882	0	0	None	179	210.26	128	102.62	10530.3	502	65	1.71	8779	1266	1657	133	68	8779
	3 cell(7, 1)	1845926	0	0	None	178	211.88	128	109.16	11915.9	513	58	1.71	8712	1399	1659	132	68	8712
	3 cell(8, 1)	1692379	0	0	None	168	192.8	92	95.95	9206.38	458	60	1.57	8778	1531	1660	133	67	8778
	3 cell(9, 1)	1679879	0	0	None	170	192.82	96	94.29	8890.79	454	49	1.56	8712	1664	1662	132	68	8712
	3 cell(10, 1)	1570243	0	0	None	169	178.86	85	87.12	7590.67	418	51	1.46	8779	1796	1664	133	68	8779
	4 cell(1, 1)	3206552	0	0	None	161	283.51	116	258.44	66791.1	1283	63	2.97	11310	617	1741	130	87	11310
	4 cell(2, 1)	3099910	0	0	None	172	274.09	98	224.85	50558.1	1027	68	2.88	11310	747	1742	130	88	11310
	4 cell(3, 1)	3006933	0	0	None	173	263.84	99	212.89	45323.5	954	60	2.79	11397	877	1742	131	87	11397
	4 cell(4, 1)	2996133	0	0	None	171	264.91	105	214.38	45956.7	929	66	2.78	11310	1008	1742	130	87	11310
	4 cell(5, 1)	2925166	0	0	None	162	258.64	99	210.28	44219.4	929	56	2.71	11310	1138	1743	130	88	11310
	4 cell(6, 1)	2866448	0	0	None	163	253.44	112	201.22	40488.8	876	56	2.66	11310	1268	1743	130	87	11310
	4 cell(7, 1)	2935259	0	0	None	161	259.53	91	213.4	45538.6	899	58	2.72	11310	1398	1743	130	87	11310
	4 cell(8, 1)	2855326	0	0	None	154	250.53	95	206.69	42719.7	892	58	2.65	11397	1528	1743	131	87	11397
	4 cell(9, 1)	2930864	0	0	None	150	259.14	103	221.69	49144.3	971	56	2.72	11310	1659	1744	130	88	11310
	4 cell(10, 1)	2966355	0	0	None	143	262.28	96	239.68	57448.5	1056	56	2.75	11310	1789	1744	130	87	11310
	5 cell(1, 1)	2910480	0	0	None	151	233.21	89	197.55	39024.2	1062	48	2.7	12480	608	1878	130	96	12480
	5 cell(2, 1)	2875493	0	0	None	158	232.19	91	175.37	30755.6	828	50	2.67	12384	737	1878	129	96	12384
	5 cell(3, 1)	2720775	0	0	None	151	218.01	88	159.64	25483.9	734	52	2.52	12480	867	1878	130	96	12480
	5 cell(4, 1)	2729700	0	0	None	147	220.42	87	170.15	28951.1	769	53	2.53	12384	996	1878	129	96	12384
	5 cell(5, 1)	2675632	0	0	None	142	214.39	89	161.92	26216.8	716	51	2.48	12480	1126	1878	130	96	12480
	5 cell(6, 1)	2571172	0	0	None	141	206.02	85	151.71	23017.3	698	55	2.38	12480	1256	1878	130	96	12480
	5 cell(7, 1)	2665662	0	0	None	141	215.25	83	165.9	27521.6	766	50	2.47	12384	1385	1878	129	96	12384
	5 cell(8, 1)	2566518	0	0	None	136	205.65	83	155.3	24119	701	49	2.38	12480	1515	1878	130	96	12480
	5 cell(9, 1)	2681059	0	0	None	146	216.49	88	165.87	27512.7	778	48	2.49	12384	1644	1878	129	96	12384
	5 cell(10, 1)	2702692	0	0	None	133	216.56	85	185.85	34541	936	54	2.51	12480	1774	1878	130	96	12480
	6	930095	0	0	None	71	70.59	70	8.59	73.74	171	38	0.86	13176	586	1200	122	108	13176

## Sheet: App Fract bound
		Volume	Area		Minus Backg.	Normalization	Bound apparent
50bp	1 cell(1, 1)	3312809	9825		2.61926e+06	1	0
	1 cell(2, 1)	2894521	9825		2.20097e+06	0.840303	0.159697
	1 cell(3, 1)	1825201	9826		1.13158e+06	0.432024	0.567976
	1 cell(4, 1)	1604854	9825		911306	0.347925	0.652075
	1 cell(5, 1)	1237960	9900		539118	0.205828	0.794172
	1 cell(6, 1)	1075840	9825		382292	0.145954	0.854046
	1 cell(7, 1)	1063817	9825		370269	0.141364	0.858636
	1 cell(8, 1)	944625	9826		251007	0.0958311	0.904169
	1 cell(9, 1)	947651	9825		254103	0.0970134	0.902987
	1 cell(10, 1)	928863	9825		235315	0.0898404	0.91016
40bp	2 cell(1, 1)	2673284	6732		2.19807e+06	1	0
	2 cell(2, 1)	2469977	6732		1.99476e+06	0.907507	0.0924934
	2 cell(3, 1)	1985223	6732		1.51001e+06	0.686971	0.313029
	2 cell(4, 1)	1795681	6732		1.32047e+06	0.60074	0.39926
	2 cell(5, 1)	1413186	6732		937974	0.426726	0.573274
	2 cell(6, 1)	1179298	6732		704086	0.32032	0.67968
	2 cell(7, 1)	1186580	6732		711368	0.323633	0.676367
	2 cell(8, 1)	933213	6732		458001	0.208365	0.791635
	2 cell(9, 1)	875161	6732		399949	0.181954	0.818046
	2 cell(10, 1)	833513	6732		358301	0.163007	0.836993
30 bp	3 cell(1, 1)	2152658	8779		1.53295e+06	1	0
	3 cell(2, 1)	2076254	8712		1.46127e+06	0.953244	0.046756
	3 cell(3, 1)	2029963	8778		1.41032e+06	0.920007	0.0799926
	3 cell(4, 1)	1996677	8712		1.3817e+06	0.901333	0.0986671
	3 cell(5, 1)	1927135	8779		1.30742e+06	0.852883	0.147117
	3 cell(6, 1)	1845882	8779		1.22617e+06	0.799878	0.200122
	3 cell(7, 1)	1845926	8712		1.23095e+06	0.802992	0.197008
	3 cell(8, 1)	1692379	8778		1.07274e+06	0.699789	0.300211
	3 cell(9, 1)	1679879	8712		1.0649e+06	0.694674	0.305326
	3 cell(10, 1)	1570243	8779		950533	0.620069	0.379931
20 bp	4 cell(1, 1)	3206552	11310		2.40818e+06	1	0
	4 cell(2, 1)	3099910	11310		2.30154e+06	0.955717	0.0442833
	4 cell(3, 1)	3006933	11397		2.20242e+06	0.914558	0.0854423
	4 cell(4, 1)	2996133	11310		2.19776e+06	0.912623	0.0873768
	4 cell(5, 1)	2925166	11310		2.12679e+06	0.883154	0.116846
	4 cell(6, 1)	2866448	11310		2.06807e+06	0.858771	0.141229
	4 cell(7, 1)	2935259	11310		2.13689e+06	0.887345	0.112655
	4 cell(8, 1)	2855326	11397		2.05081e+06	0.851603	0.148397
	4 cell(9, 1)	2930864	11310		2.13249e+06	0.88552	0.11448
	4 cell(10, 1)	2966355	11310		2.16798e+06	0.900258	0.0997422
10 bp	5 cell(1, 1)	2910480	12480		2.02952e+06	1	0
	5 cell(2, 1)	2875493	12384		2.00131e+06	0.9861	0.0139
	5 cell(3, 1)	2720775	12480		1.83981e+06	0.906527	0.093473
	5 cell(4, 1)	2729700	12384		1.85551e+06	0.914264	0.0857364
	5 cell(5, 1)	2675632	12480		1.79467e+06	0.884284	0.115716
	5 cell(6, 1)	2571172	12480		1.69021e+06	0.832813	0.167187
	5 cell(7, 1)	2665662	12384		1.79147e+06	0.88271	0.11729
	5 cell(8, 1)	2566518	12480		1.68555e+06	0.83052	0.16948
	5 cell(9, 1)	2681059	12384		1.80687e+06	0.890297	0.109703
	5 cell(10, 1)	2702692	12480		1.82173e+06	0.897617	0.102383
Background	6	930095	13176		0
