# Supplementary material for: A novel single alpha-helix DNA-binding domain in CAF-1 promotes gene silencing and DNA damage survival through tetrasome-length DNA selectivity and spacer function
Source: eLife journal article supplement (doi:10.7554/elife.83538), 2023-06-14
Supplement: fig4-data1 [file 220124 Cy5 Ladder EMSA with yCAF1 delta WHD_n2_Table.xlsx]

## Sheet: 220124 Cy5 Ladder EMSA with yCA
	Name	Volume	Background	Background Level	Background Type	Median Intensity	Average Intensity	Mode Intensity	Std Dev	Variance	Min Intensity	Max Intensity	Percent	Area > Background	Centre X	Centre Y	Width	Height	Area	Comment
	1 cell(1, 1)	1962155	0	0	None	359	348.64	93	173.66	30158.7	734	65	2.15	5628	352	1474	134	42	5628
	1 cell(2, 1)	1740486	0	0	None	307	309.25	82	150.69	22708.8	685	63	1.9	5628	486	1474	134	42	5628
	1 cell(3, 1)	1335605	0	0	None	244	239.1	82	101.71	10345.5	497	57	1.46	5586	619	1474	133	42	5586
	1 cell(4, 1)	975073	0	0	None	179	173.25	166	55.53	3083.79	293	52	1.07	5628	753	1474	134	42	5628
	1 cell(5, 1)	706130	0	0	None	128	125.47	128	28.4	806.55	263	57	0.77	5628	887	1474	134	42	5628
	1 cell(6, 1)	666015	0	0	None	118	118.34	110	24.18	584.52	229	58	0.73	5628	1021	1474	134	42	5628
	1 cell(7, 1)	584853	0	0	None	102	103.92	101	20.16	406.52	170	51	0.64	5628	1155	1474	134	42	5628
	1 cell(8, 1)	541608	0	0	None	94	96.96	88	17.78	316.06	156	53	0.59	5586	1288	1474	133	42	5586
	1 cell(9, 1)	541059	0	0	None	92	96.14	88	19.2	368.46	164	51	0.59	5628	1422	1474	134	42	5628
	1 cell(10, 1)	509764	0	0	None	87	90.58	77	18.09	327.2	286	46	0.56	5628	1556	1474	134	42	5628
	2 cell(1, 1)	2691980	0	0	None	291	318.88	103	162.32	26346.9	714	62	2.94	8442	346	1525	134	63	8442
	2 cell(2, 1)	2486938	0	0	None	247	292.41	89	158.08	24988.8	703	64	2.72	8505	480	1525	135	63	8505
	2 cell(3, 1)	2222290	0	0	None	231	263.24	197	131.32	17244.2	590	62	2.43	8442	615	1525	134	63	8442
	2 cell(4, 1)	1792110	0	0	None	190	210.71	156	96.26	9266.51	450	59	1.96	8505	749	1525	135	63	8505
	2 cell(5, 1)	1441475	0	0	None	160	170.75	129	60.77	3693.53	340	59	1.58	8442	884	1525	134	63	8442
	2 cell(6, 1)	1358325	0	0	None	152	160.9	121	52.68	2775.43	300	69	1.49	8442	1018	1525	134	63	8442
	2 cell(7, 1)	1175721	0	0	None	134	138.24	116	37.91	1436.86	236	62	1.29	8505	1152	1525	135	63	8505
	2 cell(8, 1)	1069953	0	0	None	125	126.74	120	29.85	891.23	221	53	1.17	8442	1287	1525	134	63	8442
	2 cell(9, 1)	1041400	0	0	None	120	122.45	116	30.02	901.26	360	58	1.14	8505	1421	1525	135	63	8505
	2 cell(10, 1)	940271	0	0	None	112	111.38	111	24.89	619.57	402	51	1.03	8442	1556	1525	134	63	8442
	3 cell(1, 1)	2035465	0	0	None	178	202.53	152	89.55	8019.5	459	61	2.23	10050	349	1594	134	75	10050
	3 cell(2, 1)	1939510	0	0	None	169	195.61	131	90.81	8246.35	761	60	2.12	9915	483	1594	134	74	9915
	3 cell(3, 1)	1854340	0	0	None	166	190.87	133	84.84	7198.34	429	64	2.03	9715	616	1593	134	73	9715
	3 cell(4, 1)	1776200	0	0	None	164	186.71	140	80.03	6404.43	422	59	1.94	9513	750	1592	134	71	9513
	3 cell(5, 1)	1754095	0	0	None	168	186.96	128	79.96	6393.92	443	68	1.92	9382	883	1592	135	70	9382
	3 cell(6, 1)	1670569	0	0	None	163	182.68	127	76.79	5897.25	399	60	1.83	9145	1017	1591	135	68	9145
	3 cell(7, 1)	1578830	0	0	None	159	176.5	115	74.35	5527.56	387	59	1.73	8945	1151	1590	136	67	8945
	3 cell(8, 1)	1536126	0	0	None	157	175.72	92	75.63	5720.18	384	57	1.68	8742	1284	1589	136	65	8742
	3 cell(9, 1)	1556032	0	0	None	165	181.52	97	78.83	6214.84	383	58	1.7	8572	1418	1589	136	64	8572
	3 cell(10, 1)	1382828	0	0	None	158	167.19	141	64.18	4119.33	370	54	1.51	8271	1552	1588	136	62	8271
	4 cell(1, 1)	2778114	0	0	None	161	228.03	110	161.85	26196.5	755	67	3.04	12183	362	1684	131	93	12183
	4 cell(2, 1)	2717693	0	0	None	159	221.38	100	150.35	22604.8	700	63	2.97	12276	494	1684	132	93	12276
	4 cell(3, 1)	2672073	0	0	None	156	219.33	94	152.17	23155.5	797	58	2.92	12183	625	1684	131	93	12183
	4 cell(4, 1)	2656337	0	0	None	153	216.38	98	147.16	21655.4	666	60	2.91	12276	757	1684	132	93	12276
	4 cell(5, 1)	2599755	0	0	None	151	213.39	98	141.04	19892.4	634	64	2.84	12183	888	1684	131	93	12183
	4 cell(6, 1)	2536543	0	0	None	148	208.2	102	135.78	18434.9	595	65	2.77	12183	1019	1684	131	93	12183
	4 cell(7, 1)	2546385	0	0	None	144	207.43	101	140.29	19682	635	62	2.79	12276	1151	1684	132	93	12276
	4 cell(8, 1)	2588186	0	0	None	141	212.44	96	150.5	22649.1	638	62	2.83	12183	1282	1684	131	93	12183
	4 cell(9, 1)	2672578	0	0	None	140	217.71	93	159.88	25562.9	681	60	2.92	12276	1414	1684	132	93	12276
	4 cell(10, 1)	2685499	0	0	None	144	220.43	96	164.13	26940	710	50	2.94	12183	1545	1684	131	93	12183
	5 cell(1, 1)	2163609	0	0	None	167	223.63	131	130.07	16919.5	632	61	2.37	9675	379	1819	129	75	9675
	5 cell(2, 1)	2233797	0	0	None	190	229.11	127	113.68	12923.8	558	77	2.44	9750	509	1819	130	76	9750
	5 cell(3, 1)	2194313	0	0	None	179	226.8	134	125.27	15691.8	2167	57	2.4	9675	638	1818	129	76	9675
	5 cell(4, 1)	2098170	0	0	None	175	216.87	117	115.09	13246.8	521	64	2.29	9675	767	1817	129	76	9675
	5 cell(5, 1)	2069618	0	0	None	170	212.27	117	112.81	12725.1	518	68	2.26	9750	897	1816	130	76	9750
	5 cell(6, 1)	1965938	0	0	None	168	203.2	118	101.95	10394.5	486	58	2.15	9675	1026	1815	129	75	9675
	5 cell(7, 1)	1986821	0	0	None	170	205.36	112	105.73	11178.4	489	63	2.17	9675	1155	1815	129	76	9675
	5 cell(8, 1)	1996241	0	0	None	166	206.33	119	109.62	12017.4	487	60	2.18	9675	1284	1814	129	76	9675
	5 cell(9, 1)	2082279	0	0	None	164	213.57	115	121.7	14811.6	544	66	2.28	9750	1414	1813	130	76	9750
	5 cell(10, 1)	2095022	0	0	None	161	216.56	90	141.06	19897.8	684	58	2.29	9674	1543	1811	129	77	9674
	6	1225164	0	0	None	73	72.77	72	9.62	92.47	234	42	1.34	16836	333	1153	138	122	16836

## Sheet: App Fract Bound
		Volume	Area		Minus Backg.	Normalization	Bound apparent
50bp	1 cell(1, 1)	1962155	5628		1.5526e+06	1	0
	1 cell(2, 1)	1740486	5628		1.33093e+06	0.857227	0.142773
	1 cell(3, 1)	1335605	5586		929109	0.59842	0.40158
	1 cell(4, 1)	975073	5628		565521	0.36424	0.63576
	1 cell(5, 1)	706130	5628		296578	0.19102	0.80898
	1 cell(6, 1)	666015	5628		256463	0.165182	0.834818
	1 cell(7, 1)	584853	5628		175301	0.112908	0.887092
	1 cell(8, 1)	541608	5586		135112	0.0870229	0.912977
	1 cell(9, 1)	541059	5628		131507	0.0847008	0.915299
	1 cell(10, 1)	509764	5628		100212	0.0645443	0.935456
40bp	2 cell(1, 1)	2691980	8442		2.07765e+06	1	0
	2 cell(2, 1)	2486938	8505		1.86802e+06	0.899104	0.100896
	2 cell(3, 1)	2222290	8442		1.60796e+06	0.773932	0.226068
	2 cell(4, 1)	1792110	8505		1.1732e+06	0.564675	0.435325
	2 cell(5, 1)	1441475	8442		827147	0.398116	0.601884
	2 cell(6, 1)	1358325	8442		743997	0.358095	0.641905
	2 cell(7, 1)	1175721	8505		556808	0.267999	0.732001
	2 cell(8, 1)	1069953	8442		455625	0.219298	0.780702
	2 cell(9, 1)	1041400	8505		422487	0.203348	0.796652
	2 cell(10, 1)	940271	8442		325943	0.15688	0.84312
30 bp	3 cell(1, 1)	2035465	10050		1.30412e+06	1	0
	3 cell(2, 1)	1939510	9915		1.21799e+06	0.933955	0.0660452
	3 cell(3, 1)	1854340	9715		1.14737e+06	0.879807	0.120193
	3 cell(4, 1)	1776200	9513		1.08393e+06	0.83116	0.16884
	3 cell(5, 1)	1754095	9382		1.07136e+06	0.82152	0.17848
	3 cell(6, 1)	1670569	9145		1.00508e+06	0.770697	0.229303
	3 cell(7, 1)	1578830	8945		927898	0.711512	0.288488
	3 cell(8, 1)	1536126	8742		899966	0.690094	0.309906
	3 cell(9, 1)	1556032	8572		932243	0.714844	0.285156
	3 cell(10, 1)	1382828	8271		780943	0.598827	0.401173
20 bp	4 cell(1, 1)	2778114	12183		1.89155e+06	1	0
	4 cell(2, 1)	2717693	12276		1.82436e+06	0.96448	0.0355204
	4 cell(3, 1)	2672073	12183		1.78551e+06	0.94394	0.0560603
	4 cell(4, 1)	2656337	12276		1.76301e+06	0.932043	0.0679573
	4 cell(5, 1)	2599755	12183		1.71319e+06	0.905708	0.0942925
	4 cell(6, 1)	2536543	12183		1.64998e+06	0.872289	0.127711
	4 cell(7, 1)	2546385	12276		1.65305e+06	0.873915	0.126085
	4 cell(8, 1)	2588186	12183		1.70162e+06	0.899591	0.100409
	4 cell(9, 1)	2672578	12276		1.77925e+06	0.940629	0.0593712
	4 cell(10, 1)	2685499	12183		1.79894e+06	0.951038	0.0489625
10 bp	5 cell(1, 1)	2163609	9675		1.45955e+06	0.957534	0.042466
	5 cell(2, 1)	2233797	9750		1.52428e+06	1	0
	5 cell(3, 1)	2194313	9675		1.49026e+06	0.977677	0.0223227
	5 cell(4, 1)	2098170	9675		1.39412e+06	0.914603	0.0853969
	5 cell(5, 1)	2069618	9750		1.36011e+06	0.892291	0.107709
	5 cell(6, 1)	1965938	9675		1.26188e+06	0.827853	0.172147
	5 cell(7, 1)	1986821	9675		1.28277e+06	0.841553	0.158447
	5 cell(8, 1)	1996241	9675		1.29219e+06	0.847733	0.152267
	5 cell(9, 1)	2082279	9750		1.37277e+06	0.900597	0.0994027
	5 cell(10, 1)	2095022	9674		1.39104e+06	0.912586	0.0874144
Background	6	1225164	16836		0
