# Supplementary material for: A novel single alpha-helix DNA-binding domain in CAF-1 promotes gene silencing and DNA damage survival through tetrasome-length DNA selectivity and spacer function
Source: eLife journal article supplement (doi:10.7554/elife.83538), 2023-06-14
Supplement: fig4-data1 [file 220124 Cy5 ladder EMSA with yWHD_n1_Table.xlsx]

## Sheet: 220124 Cy5 ladder EMSA with yWH
	Name	Volume	Background	Background Level	Background Type	Median Intensity	Average Intensity	Mode Intensity	Std Dev	Variance	Min Intensity	Max Intensity	Percent	Area > Background	Centre X	Centre Y	Width	Height	Area	Comment
	1 cell(1, 1)	2708291	0	0	None	412	430.71	96	242.49	58799.9	1047	60	2.92	6288	518	1408	131	48	6288
	1 cell(2, 1)	2558096	0	0	None	402	409.95	94	210.09	44136.4	981	66	2.75	6240	649	1408	130	48	6240
	1 cell(3, 1)	2505045	0	0	None	352	398.39	91	242.71	58908.4	1096	58	2.7	6288	779	1407	131	49	6288
	1 cell(4, 1)	2640692	0	0	None	375	423.19	92	257.83	66476.7	1116	64	2.84	6240	910	1407	130	48	6240
	1 cell(5, 1)	1577912	0	0	None	255	250.94	87	104.36	10891.9	503	60	1.7	6288	1040	1406	131	49	6288
	1 cell(6, 1)	1558356	0	0	None	241	249.74	88	124.1	15399.8	593	59	1.68	6240	1171	1405	130	49	6240
	1 cell(7, 1)	1287151	0	0	None	196	206.27	84	98.35	9673.51	472	57	1.39	6240	1301	1405	130	48	6240
	1 cell(8, 1)	771893	0	0	None	125	122.76	139	33.6	1128.65	199	52	0.83	6288	1431	1404	131	49	6288
	1 cell(9, 1)	665785	0	0	None	110	105.88	110	19.96	398.44	151	47	0.72	6288	1562	1404	131	48	6288
	1 cell(10, 1)	559840	0	0	None	89	89.72	86	13.96	194.76	132	50	0.6	6240	1693	1403	130	50	6240
	2 cell(1, 1)	2357298	0	0	None	441	461.4	287	232.87	54229.1	1000	64	2.54	5109	518	1453	131	39	5109
	2 cell(2, 1)	2083123	0	0	None	411	407.74	87	196.88	38763.4	798	58	2.24	5109	649	1453	131	39	5109
	2 cell(3, 1)	1975449	0	0	None	371	389.63	88	202.57	41033.1	829	62	2.13	5070	780	1453	130	40	5070
	2 cell(4, 1)	2005115	0	0	None	357	382.66	87	215.17	46296.4	845	60	2.16	5240	910	1453	131	40	5240
	2 cell(5, 1)	1274058	0	0	None	241	243.14	356	100.13	10025.4	451	61	1.37	5240	1041	1452	131	41	5240
	2 cell(6, 1)	1458503	0	0	None	240	271.55	94	143.96	20725.1	639	68	1.57	5371	1172	1452	131	42	5371
	2 cell(7, 1)	1272725	0	0	None	212	231.32	89	117.73	13860	516	56	1.37	5502	1303	1452	131	42	5502
	2 cell(8, 1)	710677	0	0	None	129	130.16	123	39.52	1561.72	229	49	0.77	5460	1434	1451	130	43	5460
	2 cell(9, 1)	572555	0	0	None	102	101.64	104	19.6	384.27	249	51	0.62	5633	1564	1451	131	43	5633
	2 cell(10, 1)	480975	0	0	None	84	84.41	81	11.77	138.65	130	46	0.52	5698	1695	1450	131	45	5698
	3 cell(1, 1)	2211917	0	0	None	235	264.08	174	125.91	15854.3	630	62	2.38	8376	514	1501	135	63	8376
	3 cell(2, 1)	2014458	0	0	None	211	240.5	160	113.77	12943.9	524	62	2.17	8376	646	1501	135	63	8376
	3 cell(3, 1)	1934872	0	0	None	198	231	159	110.4	12189	537	68	2.08	8376	778	1501	135	63	8376
	3 cell(4, 1)	1958349	0	0	None	202	233.8	170	115.74	13395.3	540	66	2.11	8376	910	1501	135	63	8376
	3 cell(5, 1)	1474169	0	0	None	170	175.94	101	62.01	3844.64	333	66	1.59	8379	1042	1501	135	64	8379
	3 cell(6, 1)	1515077	0	0	None	169	180.88	100	74.47	5545.65	405	65	1.63	8376	1174	1500	135	63	8376
	3 cell(7, 1)	1337790	0	0	None	148	159.72	88	67.2	4516.17	328	56	1.44	8376	1306	1500	135	63	8376
	3 cell(8, 1)	914968	0	0	None	105	109.24	107	26.74	714.88	186	47	0.99	8376	1438	1500	135	63	8376
	3 cell(9, 1)	798652	0	0	None	96	95.32	103	15.52	241.02	148	46	0.86	8379	1570	1500	135	64	8379
	3 cell(10, 1)	703029	0	0	None	84	83.9	83	12.2	148.86	130	43	0.76	8379	1702	1499	135	64	8379
	4 cell(1, 1)	3005092	0	0	None	197	313.03	107	272.03	74002.4	1253	70	3.24	9600	535	1573	128	75	9600
	4 cell(2, 1)	2673191	0	0	None	174	278.46	99	226.94	51501.8	942	69	2.88	9600	663	1573	128	75	9600
	4 cell(3, 1)	2660202	0	0	None	175	277.1	94	221.05	48864.8	892	65	2.86	9600	791	1573	128	76	9600
	4 cell(4, 1)	2714142	0	0	None	176.5	282.72	95	233.74	54632.1	937	67	2.92	9600	919	1572	128	75	9600
	4 cell(5, 1)	2259706	0	0	None	165	233.56	105	167.62	28094.8	2101	62	2.43	9675	1047	1572	129	76	9675
	4 cell(6, 1)	2286686	0	0	None	155	238.2	107	175.35	30747.6	760	72	2.46	9600	1176	1571	128	76	9600
	4 cell(7, 1)	1989473	0	0	None	140	207.24	88	144.72	20944.7	642	60	2.14	9600	1304	1570	128	75	9600
	4 cell(8, 1)	1291876	0	0	None	116	134.57	85	60.56	3667.97	367	53	1.39	9600	1432	1570	128	76	9600
	4 cell(9, 1)	1045802	0	0	None	103	108.94	98	29.7	882.16	219	51	1.13	9600	1560	1569	128	75	9600
	4 cell(10, 1)	914171	0	0	None	95	95.23	95	16.04	257.33	559	47	0.98	9600	1688	1568	128	77	9600
	5 cell(1, 1)	2899303	0	0	None	153	243.62	100	205.68	42304.6	1066	56	3.12	11901	533	1678	130	93	11901
	5 cell(2, 1)	2634194	0	0	None	146	221.34	89	167.46	28041.7	742	54	2.84	11901	660	1678	130	93	11901
	5 cell(3, 1)	2590840	0	0	None	146	216.01	85	165.32	27330.9	741	52	2.79	11994	787	1678	131	93	11994
	5 cell(4, 1)	2646579	0	0	None	138	222.38	87	185.87	34548.6	827	50	2.85	11901	915	1678	130	93	11901
	5 cell(5, 1)	2398844	0	0	None	138	201.57	83	148.86	22160.7	656	54	2.58	11901	1042	1678	130	93	11901
	5 cell(6, 1)	2513133	0	0	None	109	211.17	79	187.7	35232.2	822	52	2.71	11901	1169	1678	130	93	11901
	5 cell(7, 1)	2307953	0	0	None	96	193.93	72	175.72	30877.7	788	39	2.48	11901	1296	1678	130	93	11901
	5 cell(8, 1)	2267769	0	0	None	96	189.08	75	168	28225.3	738	44	2.44	11994	1423	1678	131	93	11994
	5 cell(9, 1)	2387770	0	0	None	105	200.64	77	181.64	32994.9	799	44	2.57	11901	1551	1678	130	93	11901
	5 cell(10, 1)	2069608	0	0	None	102	173.9	73	149.06	22217.9	746	41	2.23	11901	1678	1678	130	93	11901
	6	1440823	0	0	None	71	70.74	72	8.37	70.05	129	39	1.55	20368	493	1117	152	134	20368

## Sheet: App Fract Bound
		Volume	Area		Minus Backg.	Normalization	Bound apparent
50bp	1 cell(1, 1)	2708291	6288		2.26348e+06	1	0
	1 cell(2, 1)	2558096	6240		2.11668e+06	0.935144	0.0648556
	1 cell(3, 1)	2505045	6288		2.06023e+06	0.910206	0.0897936
	1 cell(4, 1)	2640692	6240		2.19928e+06	0.971635	0.0283649
	1 cell(5, 1)	1577912	6288		1.1331e+06	0.500601	0.499399
	1 cell(6, 1)	1558356	6240		1.11694e+06	0.493462	0.506538
	1 cell(7, 1)	1287151	6240		845736	0.373644	0.626356
	1 cell(8, 1)	771893	6288		327083	0.144504	0.855496
	1 cell(9, 1)	665785	6288		220975	0.0976261	0.902374
	1 cell(10, 1)	559840	6240		118425	0.05232	0.94768
40bp	2 cell(1, 1)	2357298	5109		1.99589e+06	1	0
	2 cell(2, 1)	2083123	5109		1.72171e+06	0.86263	0.13737
	2 cell(3, 1)	1975449	5070		1.6168e+06	0.810065	0.189935
	2 cell(4, 1)	2005115	5240		1.63444e+06	0.818903	0.181097
	2 cell(5, 1)	1274058	5240		903383	0.452622	0.547378
	2 cell(6, 1)	1458503	5371		1.07856e+06	0.540391	0.459609
	2 cell(7, 1)	1272725	5502		883516	0.442668	0.557332
	2 cell(8, 1)	710677	5460		324439	0.162554	0.837446
	2 cell(9, 1)	572555	5633		174079	0.0872188	0.912781
	2 cell(10, 1)	480975	5698		77901.1	0.0390308	0.960969
30 bp	3 cell(1, 1)	2211917	8376		1.6194e+06	1	0
	3 cell(2, 1)	2014458	8376		1.42194e+06	0.878067	0.121933
	3 cell(3, 1)	1934872	8376		1.34236e+06	0.828921	0.171079
	3 cell(4, 1)	1958349	8376		1.36583e+06	0.843419	0.156581
	3 cell(5, 1)	1474169	8379		881442	0.544301	0.455699
	3 cell(6, 1)	1515077	8376		922563	0.569693	0.430307
	3 cell(7, 1)	1337790	8376		745276	0.460216	0.539784
	3 cell(8, 1)	914968	8376		322454	0.199119	0.800881
	3 cell(9, 1)	798652	8379		205925	0.127161	0.872839
	3 cell(10, 1)	703029	8379		110302	0.068113	0.931887
20 bp	4 cell(1, 1)	3005092	9600		2.32599e+06	1	0
	4 cell(2, 1)	2673191	9600		1.99409e+06	0.857308	0.142692
	4 cell(3, 1)	2660202	9600		1.9811e+06	0.851724	0.148276
	4 cell(4, 1)	2714142	9600		2.03504e+06	0.874914	0.125086
	4 cell(5, 1)	2259706	9675		1.5753e+06	0.67726	0.32274
	4 cell(6, 1)	2286686	9600		1.60759e+06	0.69114	0.30886
	4 cell(7, 1)	1989473	9600		1.31037e+06	0.563361	0.436639
	4 cell(8, 1)	1291876	9600		612776	0.263447	0.736553
	4 cell(9, 1)	1045802	9600		366702	0.157654	0.842346
	4 cell(10, 1)	914171	9600		235071	0.101063	0.898937
10 bp	5 cell(1, 1)	2899303	11901		2.05743e+06	1	0
	5 cell(2, 1)	2634194	11901		1.79232e+06	0.871146	0.128854
	5 cell(3, 1)	2590840	11994		1.74239e+06	0.846876	0.153124
	5 cell(4, 1)	2646579	11901		1.80471e+06	0.877165	0.122835
	5 cell(5, 1)	2398844	11901		1.55697e+06	0.756755	0.243245
	5 cell(6, 1)	2513133	11901		1.67126e+06	0.812305	0.187695
	5 cell(7, 1)	2307953	11901		1.46608e+06	0.712579	0.287421
	5 cell(8, 1)	2267769	11994		1.41932e+06	0.68985	0.31015
	5 cell(9, 1)	2387770	11901		1.5459e+06	0.751373	0.248627
	5 cell(10, 1)	2069608	11901		1.22774e+06	0.596733	0.403267
Background	6	1440823	20368		0
