# Supplementary material for: A novel single alpha-helix DNA-binding domain in CAF-1 promotes gene silencing and DNA damage survival through tetrasome-length DNA selectivity and spacer function
Source: eLife journal article supplement (doi:10.7554/elife.83538), 2023-06-14
Supplement: fig4-data1 [file 220124 Cy5 ladder EMSA with yWHD_n2_Table.xlsx]

## Sheet: 220124 Cy5 ladder EMSA with yWH
	Name	Volume	Background	Background Level	Background Type	Median Intensity	Average Intensity	Mode Intensity	Std Dev	Variance	Min Intensity	Max Intensity	Percent	Area > Background	Centre X	Centre Y	Width	Height	Area	Comment
	1 cell(1, 1)	2931507	0	0	None	328	370.14	87	247.63	61322.9	1104	61	2.89	7920	627	1307	132	60	7920
	1 cell(2, 1)	2873194	0	0	None	316	360.05	90	234.47	54977.4	1001	58	2.84	7980	759	1307	133	61	7980
	1 cell(3, 1)	2688516	0	0	None	306	339.46	89	216.71	46963.9	925	53	2.65	7920	892	1308	132	60	7920
	1 cell(4, 1)	2609827	0	0	None	298	329.52	98	215	46223.9	923	61	2.58	7920	1024	1308	132	60	7920
	1 cell(5, 1)	2274448	0	0	None	256	285.02	89	169.05	28577.5	776	63	2.25	7980	1156	1308	133	61	7980
	1 cell(6, 1)	1902475	0	0	None	208	240.21	126	126.46	15991.8	585	53	1.88	7920	1289	1309	132	60	7920
	1 cell(7, 1)	1562631	0	0	None	180.5	197.3	133	85.29	7275	401	51	1.54	7920	1421	1309	132	60	7920
	1 cell(8, 1)	1140802	0	0	None	144	144.04	131	42.93	1842.84	275	52	1.13	7920	1553	1309	132	60	7920
	1 cell(9, 1)	1097796	0	0	None	144	137.57	151	38.76	1502.23	236	48	1.08	7980	1685	1309	133	61	7980
	1 cell(10, 1)	824224	0	0	None	106	104.07	110	20.36	414.49	161	41	0.81	7920	1818	1310	132	60	7920
	2 cell(1, 1)	2873881	0	0	None	294	360.14	155	224.52	50408.9	1012	71	2.84	7980	627	1369	133	60	7980
	2 cell(2, 1)	2779149	0	0	None	293	350.9	89	215.8	46571.1	899	57	2.74	7920	760	1369	132	60	7920
	2 cell(3, 1)	2688562	0	0	None	291	336.91	92	194.13	37685	850	69	2.65	7980	892	1369	133	60	7980
	2 cell(4, 1)	2699486	0	0	None	291	340.84	93	191.75	36769.3	791	57	2.66	7920	1025	1369	132	60	7920
	2 cell(5, 1)	2443677	0	0	None	273	306.23	87	159.28	25370.9	706	53	2.41	7980	1157	1369	133	60	7980
	2 cell(6, 1)	2104014	0	0	None	248	263.66	86	121.87	14851.5	558	54	2.08	7980	1290	1369	133	60	7980
	2 cell(7, 1)	1663288	0	0	None	201	210.01	185	84.59	7155.38	402	48	1.64	7920	1423	1369	132	60	7920
	2 cell(8, 1)	1042034	0	0	None	134	130.58	130	33.9	1149.21	221	42	1.03	7980	1555	1369	133	60	7980
	2 cell(9, 1)	908478	0	0	None	118	114.71	124	25.41	645.75	186	47	0.9	7920	1688	1369	132	60	7920
	2 cell(10, 1)	780673	0	0	None	99	97.83	101	18.51	342.66	207	44	0.77	7980	1820	1369	133	60	7980
	3 cell(1, 1)	1752967	0	0	None	213	245.93	94	128.22	16440.7	597	52	1.73	7128	621	1429	132	54	7128
	3 cell(2, 1)	1737503	0	0	None	210	241.92	97	126.26	15940.9	554	61	1.72	7182	753	1429	133	55	7182
	3 cell(3, 1)	1699486	0	0	None	212	238.42	90	115.8	13408.9	535	57	1.68	7128	886	1430	132	54	7128
	3 cell(4, 1)	1701718	0	0	None	211	238.74	160	113.3	12835.9	522	58	1.68	7128	1018	1430	132	54	7128
	3 cell(5, 1)	1627288	0	0	None	205	226.58	156	102.06	10416	489	64	1.61	7182	1150	1430	133	55	7182
	3 cell(6, 1)	1472979	0	0	None	189	206.65	160	84.19	7088.15	453	57	1.45	7128	1283	1431	132	54	7128
	3 cell(7, 1)	1234777	0	0	None	163	173.23	138	61.01	3721.84	318	52	1.22	7128	1415	1431	132	54	7128
	3 cell(8, 1)	846611	0	0	None	120	118.77	124	28.53	814.16	206	51	0.84	7128	1547	1431	132	54	7128
	3 cell(9, 1)	755038	0	0	None	107.5	105.13	114	20.23	409.07	159	50	0.75	7182	1679	1431	133	55	7182
	3 cell(10, 1)	654995	0	0	None	93	91.89	97	13.92	193.85	137	46	0.65	7128	1812	1432	132	54	7128
	4 cell(1, 1)	2840036	0	0	None	173	275.84	109	224.07	50205.2	993	57	2.8	10296	618	1498	132	78	10296
	4 cell(2, 1)	2875881	0	0	None	177	279.32	105	223.59	49990.6	953	72	2.84	10296	750	1498	132	79	10296
	4 cell(3, 1)	2803432	0	0	None	183	272.28	97	207.36	42998.9	881	68	2.77	10296	882	1499	132	78	10296
	4 cell(4, 1)	2819085	0	0	None	184	273.8	96	211	44519.2	885	63	2.78	10296	1014	1499	132	78	10296
	4 cell(5, 1)	2752891	0	0	None	182	267.37	94	201.07	40428.3	852	63	2.72	10296	1146	1499	132	79	10296
	4 cell(6, 1)	2566651	0	0	None	181	249.29	96	171.34	29357.9	766	67	2.53	10296	1278	1500	132	78	10296
	4 cell(7, 1)	2240151	0	0	None	163	217.57	97	139.72	19520.8	625	63	2.21	10296	1410	1500	132	78	10296
	4 cell(8, 1)	1429316	0	0	None	121	138.82	105	56.62	3206.13	330	57	1.41	10296	1542	1500	132	78	10296
	4 cell(9, 1)	1202033	0	0	None	111	116.75	110	33.37	1113.43	240	45	1.19	10296	1674	1500	132	79	10296
	4 cell(10, 1)	993429	0	0	None	97	96.49	96	17.78	315.98	157	46	0.98	10296	1806	1501	132	78	10296
	5 cell(1, 1)	2426151	0	0	None	146	225.65	82	176.83	31269.8	798	53	2.39	10752	637	1624	128	84	10752
	5 cell(2, 1)	2497833	0	0	None	155	232.31	84	178.49	31858.4	796	52	2.47	10752	765	1624	128	84	10752
	5 cell(3, 1)	2453815	0	0	None	158	228.22	83	166.67	27777.3	721	58	2.42	10752	893	1624	128	84	10752
	5 cell(4, 1)	2461522	0	0	None	159	228.94	86	169.52	28738.2	715	57	2.43	10752	1021	1624	128	84	10752
	5 cell(5, 1)	2509663	0	0	None	160	231.6	85	171.89	29545.3	730	55	2.48	10836	1149	1624	129	84	10836
	5 cell(6, 1)	2467554	0	0	None	161	229.5	85	167.21	27958.5	761	47	2.44	10752	1278	1624	128	84	10752
	5 cell(7, 1)	2406261	0	0	None	160	223.8	83	159.01	25284.6	729	55	2.38	10752	1406	1624	128	84	10752
	5 cell(8, 1)	2455344	0	0	None	153	228.36	80	172.68	29820.1	766	51	2.42	10752	1534	1624	128	84	10752
	5 cell(9, 1)	2465462	0	0	None	155	229.3	83	175.4	30765.9	778	49	2.43	10752	1662	1624	128	84	10752
	5 cell(10, 1)	2148167	0	0	None	126	199.79	85	165.97	27544.7	806	44	2.12	10752	1790	1624	128	84	10752
	6	1119615	0	0	None	68	68.2	69	8.12	65.97	100	33	1.11	16416	609	1033	144	114	16416

## Sheet: App Fract Bound
		Volume	Area		Minus Backg.	Normalization	Bound apparent
50bp	1 cell(1, 1)	2931507	7920		2.39134e+06	1	0
	1 cell(2, 1)	2873194	7980		2.32894e+06	0.973904	0.0260963
	1 cell(3, 1)	2688516	7920		2.14835e+06	0.898387	0.101613
	1 cell(4, 1)	2609827	7920		2.06966e+06	0.865481	0.134519
	1 cell(5, 1)	2274448	7980		1.73019e+06	0.723523	0.276477
	1 cell(6, 1)	1902475	7920		1.36231e+06	0.569684	0.430316
	1 cell(7, 1)	1562631	7920		1.02247e+06	0.42757	0.57243
	1 cell(8, 1)	1140802	7920		600637	0.251171	0.748829
	1 cell(9, 1)	1097796	7980		553539	0.231476	0.768524
	1 cell(10, 1)	824224	7920		284059	0.118786	0.881214
40bp	2 cell(1, 1)	2873881	7980		2.32962e+06	1	0
	2 cell(2, 1)	2779149	7920		2.23898e+06	0.961092	0.0389075
	2 cell(3, 1)	2688562	7980		2.1443e+06	0.920451	0.0795489
	2 cell(4, 1)	2699486	7920		2.15932e+06	0.926897	0.0731032
	2 cell(5, 1)	2443677	7980		1.89942e+06	0.815333	0.184667
	2 cell(6, 1)	2104014	7980		1.55976e+06	0.669532	0.330468
	2 cell(7, 1)	1663288	7920		1.12312e+06	0.482105	0.517895
	2 cell(8, 1)	1042034	7980		497777	0.213673	0.786327
	2 cell(9, 1)	908478	7920		368313	0.1581	0.8419
	2 cell(10, 1)	780673	7980		236416	0.101482	0.898518
30 bp	3 cell(1, 1)	1752967	7128		1.26682e+06	1	0
	3 cell(2, 1)	1737503	7182		1.24767e+06	0.984886	0.0151142
	3 cell(3, 1)	1699486	7128		1.21334e+06	0.957783	0.0422168
	3 cell(4, 1)	1701718	7128		1.21557e+06	0.959545	0.0404549
	3 cell(5, 1)	1627288	7182		1.13746e+06	0.897884	0.102116
	3 cell(6, 1)	1472979	7128		986830	0.778983	0.221017
	3 cell(7, 1)	1234777	7128		748628	0.590952	0.409048
	3 cell(8, 1)	846611	7128		360462	0.284541	0.715459
	3 cell(9, 1)	755038	7182		265206	0.209348	0.790652
	3 cell(10, 1)	654995	7128		168846	0.133284	0.866716
20 bp	4 cell(1, 1)	2840036	10296		2.13782e+06	0.983509	0.0164906
	4 cell(2, 1)	2875881	10296		2.17367e+06	1	0
	4 cell(3, 1)	2803432	10296		2.10122e+06	0.96667	0.0333303
	4 cell(4, 1)	2819085	10296		2.11687e+06	0.973871	0.0261291
	4 cell(5, 1)	2752891	10296		2.05068e+06	0.943418	0.0565818
	4 cell(6, 1)	2566651	10296		1.86444e+06	0.857738	0.142262
	4 cell(7, 1)	2240151	10296		1.53794e+06	0.707531	0.292469
	4 cell(8, 1)	1429316	10296		727101	0.334505	0.665495
	4 cell(9, 1)	1202033	10296		499818	0.229943	0.770057
	4 cell(10, 1)	993429	10296		291214	0.133974	0.866026
10 bp	5 cell(1, 1)	2426151	10752		1.69284e+06	0.95607	0.0439298
	5 cell(2, 1)	2497833	10752		1.76452e+06	0.996554	0.00344567
	5 cell(3, 1)	2453815	10752		1.7205e+06	0.971694	0.0283059
	5 cell(4, 1)	2461522	10752		1.72821e+06	0.976047	0.0239532
	5 cell(5, 1)	2509663	10836		1.77062e+06	1	0
	5 cell(6, 1)	2467554	10752		1.73424e+06	0.979454	0.0205465
	5 cell(7, 1)	2406261	10752		1.67295e+06	0.944837	0.0551632
	5 cell(8, 1)	2455344	10752		1.72203e+06	0.972558	0.0274424
	5 cell(9, 1)	2465462	10752		1.73215e+06	0.978272	0.021728
	5 cell(10, 1)	2148167	10752		1.41485e+06	0.799072	0.200928
Background	6	1119615	16416		0
