# Supplementary material for: A novel single alpha-helix DNA-binding domain in CAF-1 promotes gene silencing and DNA damage survival through tetrasome-length DNA selectivity and spacer function
Source: eLife journal article supplement (doi:10.7554/elife.83538), 2023-06-14
Supplement: fig4-data1 [file 220127 Cy5 ladder EMSA with yCAF1 EDtoGSL_n1_Table.xlsx]

## Sheet: 220127 Cy5 ladder EMSA with yCA
	Name	Volume	Background	Background Level	Background Type	Median Intensity	Average Intensity	Mode Intensity	Std Dev	Variance	Min Intensity	Max Intensity	Percent	Area > Background	Centre X	Centre Y	Width	Height	Area	Comment
	1 cell(1, 1)	3133931	0	0	None	328	362.47	89	246.73	60874.2	1182	56	3.33	8646	486	1280	131	67	8646
	1 cell(2, 1)	2852993	0	0	None	246	329.98	93	240.93	58045.8	1073	63	3.04	8646	617	1281	131	67	8646
	1 cell(3, 1)	2160072	0	0	None	154	249.83	88	201.42	40568.2	889	61	2.3	8646	748	1282	131	67	8646
	1 cell(4, 1)	1536500	0	0	None	127	177.71	94	116.52	13578	592	55	1.63	8646	879	1283	131	67	8646
	1 cell(5, 1)	1205766	0	0	None	113	139.46	104	61.17	3742.14	332	57	1.28	8646	1010	1284	131	67	8646
	1 cell(6, 1)	960299	0	0	None	107	111.07	88	25.06	628.05	192	56	1.02	8646	1141	1285	131	67	8646
	1 cell(7, 1)	1006220	0	0	None	112	116.38	86	33.61	1129.81	265	51	1.07	8646	1272	1286	131	67	8646
	1 cell(8, 1)	934599	0	0	None	101	108.1	93	27.16	737.72	203	51	0.99	8646	1403	1287	131	67	8646
	1 cell(9, 1)	868191	0	0	None	94	100.42	87	24.16	583.68	325	51	0.92	8646	1534	1288	131	67	8646
	1 cell(10, 1)	830457	0	0	None	95	96.05	95	21.74	472.46	429	55	0.88	8646	1665	1289	131	67	8646
	2 cell(1, 1)	2213221	0	0	None	405	425.62	312	212.93	45340.3	913	63	2.35	5200	495	1338	130	41	5200
	2 cell(2, 1)	2137035	0	0	None	369.5	410.97	92	247.03	61025.2	1062	67	2.27	5200	625	1339	130	41	5200
	2 cell(3, 1)	2215363	0	0	None	367	429.33	92	266.93	71253.4	1096	58	2.36	5160	754	1340	129	41	5160
	2 cell(4, 1)	1825532	0	0	None	303	351.06	91	206.09	42474.3	916	63	1.94	5200	884	1341	130	41	5200
	2 cell(5, 1)	1400004	0	0	None	245	269.23	185	133.82	17908	586	56	1.49	5200	1014	1342	130	41	5200
	2 cell(6, 1)	811703	0	0	None	153	156.1	134	42.73	1826.01	345	63	0.86	5200	1144	1343	130	41	5200
	2 cell(7, 1)	914112	0	0	None	173	175.79	134	59.72	3566.47	330	59	0.97	5200	1274	1344	130	41	5200
	2 cell(8, 1)	608904	0	0	None	116	118	103	25.66	658.5	199	52	0.65	5160	1403	1345	129	41	5160
	2 cell(9, 1)	532968	0	0	None	102	102.49	97	17.34	300.76	159	48	0.57	5200	1533	1346	130	41	5200
	2 cell(10, 1)	460139	0	0	None	89	88.49	90	11.24	126.39	127	51	0.49	5200	1663	1347	130	41	5200
	3 cell(1, 1)	1625722	0	0	None	219	262.51	189	125.86	15840.3	577	65	1.73	6193	500	1383	129	50	6193
	3 cell(2, 1)	1642233	0	0	None	247	265.22	169	115.55	13352.8	543	65	1.75	6192	629	1384	129	49	6192
	3 cell(3, 1)	1683307	0	0	None	248	269.76	93	130.96	17151.1	585	64	1.79	6240	759	1386	130	50	6240
	3 cell(4, 1)	1656047	0	0	None	243	267.45	95	131.51	17294.8	627	71	1.76	6192	888	1387	129	49	6192
	3 cell(5, 1)	1546813	0	0	None	225	249.77	98	122.91	15106.2	705	68	1.65	6193	1017	1389	129	50	6193
	3 cell(6, 1)	1226837	0	0	None	180	198.1	97	88.24	7786.29	410	67	1.31	6193	1146	1391	129	50	6193
	3 cell(7, 1)	1373569	0	0	None	198	221.83	89	106.97	11442	468	63	1.46	6192	1275	1392	129	49	6192
	3 cell(8, 1)	1011749	0	0	None	151	162.14	125	65.72	4318.95	406	52	1.08	6240	1405	1394	130	50	6240
	3 cell(9, 1)	798374	0	0	None	121	128.94	115	40.44	1635.45	238	56	0.85	6192	1534	1395	129	49	6192
	3 cell(10, 1)	568348	0	0	None	90	91.77	91	17.93	321.65	167	47	0.6	6193	1663	1397	129	50	6193
	4 cell(1, 1)	2793731	0	0	None	184	298.48	104	267.53	71574.8	2737	55	2.97	9360	493	1464	130	72	9360
	4 cell(2, 1)	2596313	0	0	None	182	277.38	97	213.07	45398.8	880	70	2.76	9360	623	1464	130	72	9360
	4 cell(3, 1)	2639910	0	0	None	178	284.23	103	229.23	52545	970	62	2.81	9288	752	1464	129	72	9288
	4 cell(4, 1)	2545909	0	0	None	169	272	94	206.73	42735.5	868	67	2.71	9360	882	1464	130	72	9360
	4 cell(5, 1)	2554389	0	0	None	167	272.9	103	214.89	46177.3	948	61	2.72	9360	1012	1464	130	72	9360
	4 cell(6, 1)	2434369	0	0	None	162	260.08	100	206	42435.5	859	67	2.59	9360	1142	1464	130	72	9360
	4 cell(7, 1)	2550247	0	0	None	169	272.46	95	217.02	47098.6	978	61	2.71	9360	1272	1464	130	72	9360
	4 cell(8, 1)	2213129	0	0	None	151	238.28	99	184.27	33954.8	789	57	2.35	9288	1401	1464	129	72	9288
	4 cell(9, 1)	1883366	0	0	None	132	201.21	103	144.35	20836.6	625	51	2	9360	1531	1464	130	72	9360
	4 cell(10, 1)	1403929	0	0	None	107	149.99	92	98.14	9632.28	934	52	1.49	9360	1661	1464	130	72	9360
	5 cell(1, 1)	3073559	0	0	None	126	205.1	90	185.2	34298	1578	55	3.27	14986	511	1575	127	118	14986
	5 cell(2, 1)	2871743	0	0	None	126	191.63	85	150.84	22752.2	695	53	3.06	14986	638	1575	127	118	14986
	5 cell(3, 1)	2891317	0	0	None	118	192.93	80	162.93	26544.6	782	50	3.08	14986	765	1575	127	118	14986
	5 cell(4, 1)	2734634	0	0	None	116	182.48	81	147.5	21756.7	720	46	2.91	14986	892	1575	127	118	14986
	5 cell(5, 1)	2733150	0	0	None	109	182.38	81	152.53	23264.6	728	51	2.91	14986	1019	1575	127	118	14986
	5 cell(6, 1)	2755252	0	0	None	111	183.86	78	155.08	24049.2	720	46	2.93	14986	1146	1575	127	118	14986
	5 cell(7, 1)	2674629	0	0	None	104	178.48	76	156.22	24404.2	727	51	2.85	14986	1273	1575	127	118	14986
	5 cell(8, 1)	2607977	0	0	None	105	174.03	79	149.14	22241.9	701	45	2.77	14986	1400	1575	127	118	14986
	5 cell(9, 1)	2547194	0	0	None	106	169.97	81	138.62	19214.7	688	44	2.71	14986	1527	1575	127	118	14986
	5 cell(10, 1)	2688706	0	0	None	101	179.41	78	179.19	32108	967	41	2.86	14986	1654	1575	127	118	14986
	6	1054207	0	0	None	71	71.38	72	11.29	127.5	453	39	1.12	14768	485	1016	142	104	14768

## Sheet: APP Fract Bound
		Volume	Area		Minus Backg.	Normalization	Bound apparent
50bp	1 cell(1, 1)	3133931	8646		2.51674e+06	1	0
	1 cell(2, 1)	2852993	8646		2.2358e+06	0.888372	0.111628
	1 cell(3, 1)	2160072	8646		1.54288e+06	0.613047	0.386953
	1 cell(4, 1)	1536500	8646		919309	0.365278	0.634722
	1 cell(5, 1)	1205766	8646		588575	0.233864	0.766136
	1 cell(6, 1)	960299	8646		343108	0.13633	0.86367
	1 cell(7, 1)	1006220	8646		389029	0.154577	0.845423
	1 cell(8, 1)	934599	8646		317408	0.126119	0.873881
	1 cell(9, 1)	868191	8646		251000	0.0997323	0.900268
	1 cell(10, 1)	830457	8646		213266	0.0847391	0.915261
40bp	2 cell(1, 1)	2213221	5200		1.84202e+06	0.997294	0.00270565
	2 cell(2, 1)	2137035	5200		1.76584e+06	0.956046	0.0439537
	2 cell(3, 1)	2215363	5160		1.84702e+06	1	0
	2 cell(4, 1)	1825532	5200		1.45433e+06	0.787394	0.212606
	2 cell(5, 1)	1400004	5200		1.0288e+06	0.557008	0.442992
	2 cell(6, 1)	811703	5200		440503	0.238494	0.761506
	2 cell(7, 1)	914112	5200		542912	0.29394	0.70606
	2 cell(8, 1)	608904	5160		240560	0.130242	0.869758
	2 cell(9, 1)	532968	5200		161768	0.0875835	0.912417
	2 cell(10, 1)	460139	5200		88939.4	0.0481529	0.951847
30 bp	3 cell(1, 1)	1625722	6193		1.18364e+06	0.956191	0.0438092
	3 cell(2, 1)	1642233	6192		1.20022e+06	0.969587	0.0304132
	3 cell(3, 1)	1683307	6240		1.23787e+06	1	0
	3 cell(4, 1)	1656047	6192		1.21403e+06	0.980746	0.0192537
	3 cell(5, 1)	1546813	6193		1.10473e+06	0.892445	0.107555
	3 cell(6, 1)	1226837	6193		784752	0.633955	0.366045
	3 cell(7, 1)	1373569	6192		931556	0.752549	0.247451
	3 cell(8, 1)	1011749	6240		566309	0.457488	0.542512
	3 cell(9, 1)	798374	6192		356361	0.287883	0.712117
	3 cell(10, 1)	568348	6193		126263	0.102001	0.897999
20 bp	4 cell(1, 1)	2793731	9360		2.12557e+06	1	0
	4 cell(2, 1)	2596313	9360		1.92815e+06	0.907122	0.0928776
	4 cell(3, 1)	2639910	9288		1.97689e+06	0.930051	0.0699489
	4 cell(4, 1)	2545909	9360		1.87775e+06	0.883409	0.116591
	4 cell(5, 1)	2554389	9360		1.88623e+06	0.887399	0.112601
	4 cell(6, 1)	2434369	9360		1.76621e+06	0.830934	0.169066
	4 cell(7, 1)	2550247	9360		1.88209e+06	0.88545	0.11455
	4 cell(8, 1)	2213129	9288		1.55011e+06	0.729267	0.270733
	4 cell(9, 1)	1883366	9360		1.21521e+06	0.571708	0.428292
	4 cell(10, 1)	1403929	9360		735770	0.346151	0.653849
10 bp	5 cell(1, 1)	3073559	14986		2.00379e+06	1	0
	5 cell(2, 1)	2871743	14986		1.80197e+06	0.899283	0.100717
	5 cell(3, 1)	2891317	14986		1.82155e+06	0.909051	0.0909486
	5 cell(4, 1)	2734634	14986		1.66487e+06	0.830858	0.169142
	5 cell(5, 1)	2733150	14986		1.66338e+06	0.830117	0.169883
	5 cell(6, 1)	2755252	14986		1.68548e+06	0.841148	0.158852
	5 cell(7, 1)	2674629	14986		1.60486e+06	0.800912	0.199088
	5 cell(8, 1)	2607977	14986		1.53821e+06	0.767649	0.232351
	5 cell(9, 1)	2547194	14986		1.47743e+06	0.737315	0.262685
	5 cell(10, 1)	2688706	14986		1.61894e+06	0.807937	0.192063
Background	6	1054207	14768		0
