# Supplementary material for: A novel single alpha-helix DNA-binding domain in CAF-1 promotes gene silencing and DNA damage survival through tetrasome-length DNA selectivity and spacer function
Source: eLife journal article supplement (doi:10.7554/elife.83538), 2023-06-14
Supplement: fig4-data1 [file 220128 Cy5 ladder EMSA with yCAF1 EDtoGSL_n1_Table.xlsx]

## Sheet: 220128 Cy5 ladder EMSA with yCA
	Name	Volume	Background	Background Level	Background Type	Median Intensity	Average Intensity	Mode Intensity	Std Dev	Variance	Min Intensity	Max Intensity	Percent	Area > Background	Centre X	Centre Y	Width	Height	Area	Comment
	1 cell(1, 1)	2950549	0	0	None	399	441.63	89	278.57	77603.8	1194	53	3.08	6681	608	1462	131	52	6681
	1 cell(2, 1)	2599701	0	0	None	339	389.12	93	261.96	68624.7	1207	61	2.72	6681	739	1463	131	52	6681
	1 cell(3, 1)	1671080	0	0	None	197	252.05	115	157.12	24685.4	759	62	1.75	6630	870	1464	130	52	6630
	1 cell(4, 1)	1362026	0	0	None	158	203.87	95	120.98	14637.2	527	57	1.42	6681	1000	1465	131	52	6681
	1 cell(5, 1)	1074340	0	0	None	144	160.81	113	64.97	4221	345	62	1.12	6681	1131	1466	131	52	6681
	1 cell(6, 1)	861917	0	0	None	125	129.01	97	37.38	1397.4	239	52	0.9	6681	1262	1466	131	51	6681
	1 cell(7, 1)	764940	0	0	None	111	114.49	115	27.93	779.87	195	56	0.8	6681	1393	1467	131	52	6681
	1 cell(8, 1)	689675	0	0	None	95	104.02	84	27.45	753.35	186	47	0.72	6630	1524	1468	130	52	6630
	1 cell(9, 1)	644562	0	0	None	94	96.48	91	19.78	391.09	163	44	0.67	6681	1654	1469	131	52	6681
	1 cell(10, 1)	566409	0	0	None	85	84.78	84	10.1	101.99	127	46	0.59	6681	1785	1470	131	52	6681
	2 cell(1, 1)	1962156	0	0	None	501	490.66	414	236.6	55980.5	992	50	2.05	3999	613	1506	129	33	3999
	2 cell(2, 1)	1997593	0	0	None	428	472.8	90	278.31	77455	1135	65	2.09	4225	743	1508	130	34	4225
	2 cell(3, 1)	1810013	0	0	None	391	418.79	90	228.65	52282.6	977	64	1.89	4322	872	1510	129	36	4322
	2 cell(4, 1)	1685258	0	0	None	335	373.26	103	206.19	42514.6	849	70	1.76	4515	1001	1512	129	37	4515
	2 cell(5, 1)	1324228	0	0	None	253	275.25	90	132.03	17431	596	62	1.38	4811	1131	1514	130	39	4811
	2 cell(6, 1)	994763	0	0	None	197	200.27	146	74.14	5497.08	368	55	1.04	4967	1260	1516	129	40	4967
	2 cell(7, 1)	748042	0	0	None	146	144.97	174	38.16	1456.33	235	62	0.78	5160	1389	1518	129	42	5160
	2 cell(8, 1)	596944	0	0	None	108	111.49	101	24.16	583.65	175	52	0.62	5354	1518	1520	129	44	5354
	2 cell(9, 1)	584238	0	0	None	105	105.74	100	19.67	386.74	166	50	0.61	5525	1648	1522	130	44	5525
	2 cell(10, 1)	495208	0	0	None	88	87.25	90	10.79	116.32	117	52	0.52	5676	1777	1524	129	46	5676
	3 cell(1, 1)	1998327	0	0	None	227	258.05	186	120.86	14607.5	599	60	2.09	7744	608	1556	131	62	7744
	3 cell(2, 1)	1873415	0	0	None	218	252.52	163	120.61	14547.4	563	67	1.96	7419	738	1557	131	59	7419
	3 cell(3, 1)	1820718	0	0	None	223	252	168	117.25	13747.9	562	67	1.9	7225	868	1559	130	58	7225
	3 cell(4, 1)	1756103	0	0	None	226	252.5	98	118.37	14012	520	73	1.83	6955	998	1560	130	55	6955
	3 cell(5, 1)	1695261	0	0	None	230	250.74	173	111.97	12537	531	69	1.77	6761	1128	1562	130	54	6761
	3 cell(6, 1)	1505449	0	0	None	211	231.04	158	100.54	10107.5	479	69	1.57	6516	1258	1564	130	52	6516
	3 cell(7, 1)	1244172	0	0	None	188	200.83	142	82.97	6884.08	393	60	1.3	6195	1387	1565	131	50	6195
	3 cell(8, 1)	938995	0	0	None	147	156.5	110	55.33	3061.03	293	48	0.98	6000	1517	1567	130	48	6000
	3 cell(9, 1)	834244	0	0	None	136	145.82	106	48.46	2348.32	271	53	0.87	5721	1647	1568	130	46	5721
	3 cell(10, 1)	530318	0	0	None	95	95.99	93	15.15	229.46	149	52	0.55	5525	1777	1570	130	44	5525
	4 cell(1, 1)	2878300	0	0	None	188	291.33	100	246.15	60591.5	1085	57	3.01	9880	610	1633	130	76	9880
	4 cell(2, 1)	2835741	0	0	None	196	287.02	102	220.45	48600.1	954	67	2.96	9880	740	1633	130	76	9880
	4 cell(3, 1)	2824850	0	0	None	201	288.13	111	217.99	47519.2	935	61	2.95	9804	869	1633	129	76	9804
	4 cell(4, 1)	2812656	0	0	None	191	284.68	101	220.88	48789.3	920	70	2.94	9880	999	1633	130	76	9880
	4 cell(5, 1)	2806508	0	0	None	193	284.06	100	216.48	46863.3	890	68	2.93	9880	1129	1633	130	76	9880
	4 cell(6, 1)	2660462	0	0	None	188	269.28	104	199.61	39845.8	825	61	2.78	9880	1259	1633	130	76	9880
	4 cell(7, 1)	2479227	0	0	None	172	250.93	100	186.75	34877	774	53	2.59	9880	1389	1633	130	76	9880
	4 cell(8, 1)	2207431	0	0	None	149	225.16	102	167.17	27945.6	731	57	2.31	9804	1518	1633	129	76	9804
	4 cell(9, 1)	2082352	0	0	None	136	210.76	104	157.81	24905.3	718	56	2.18	9880	1648	1633	130	76	9880
	4 cell(10, 1)	1436340	0	0	None	108	145.38	90	85.01	7225.86	440	52	1.5	9880	1778	1633	130	76	9880
	5 cell(1, 1)	3226028	0	0	None	127	195.37	105	166.38	27682.9	907	52	3.37	16512	615	1745	129	128	16512
	5 cell(2, 1)	3114641	0	0	None	125	190.1	95	143.45	20578.5	756	57	3.25	16384	744	1745	128	128	16384
	5 cell(3, 1)	3083596	0	0	None	123	186.75	93	143.45	20577.4	723	51	3.22	16512	872	1745	129	128	16512
	5 cell(4, 1)	3031321	0	0	None	122	185.02	87	146.25	21390.2	728	55	3.17	16384	1001	1745	128	128	16384
	5 cell(5, 1)	3074226	0	0	None	118	186.18	84	152.21	23167.2	715	51	3.21	16512	1129	1745	129	128	16512
	5 cell(6, 1)	2934807	0	0	None	114	177.74	87	141.92	20141.7	678	50	3.07	16512	1258	1745	129	128	16512
	5 cell(7, 1)	2829368	0	0	None	111.5	172.69	84	136.8	18713.2	647	50	2.96	16384	1387	1745	128	128	16384
	5 cell(8, 1)	2920983	0	0	None	114	176.9	84	144.86	20984.2	694	48	3.05	16512	1515	1745	129	128	16512
	5 cell(9, 1)	2929226	0	0	None	113	178.79	86	148.78	22135.5	724	48	3.06	16384	1644	1745	128	128	16384
	5 cell(10, 1)	3010457	0	0	None	111	182.32	89	169.14	28607.6	932	47	3.15	16512	1772	1745	129	128	16512
	6	950642	0	0	None	71	70.67	70	7.86	61.79	106	37	0.99	13452	596	1193	114	118	13452

## Sheet: App Fract Bound
		Volume	Area		Minus Backg.	Normalization	Bound apparent
50bp	1 cell(1, 1)	2950549	6681		2.47841e+06	1	0
	1 cell(2, 1)	2599701	6681		2.12756e+06	0.858438	0.141562
	1 cell(3, 1)	1671080	6630		1.20254e+06	0.485208	0.514792
	1 cell(4, 1)	1362026	6681		889885	0.359055	0.640945
	1 cell(5, 1)	1074340	6681		602199	0.242978	0.757022
	1 cell(6, 1)	861917	6681		389776	0.157269	0.842731
	1 cell(7, 1)	764940	6681		292799	0.11814	0.88186
	1 cell(8, 1)	689675	6630		221138	0.0892259	0.910774
	1 cell(9, 1)	644562	6681		172421	0.0695693	0.930431
	1 cell(10, 1)	566409	6681		94268.1	0.0380358	0.961964
40bp	2 cell(1, 1)	1962156	3999		1.67955e+06	0.988543	0.0114571
	2 cell(2, 1)	1997593	4225		1.69902e+06	1	0
	2 cell(3, 1)	1810013	4322		1.50458e+06	0.88556	0.11444
	2 cell(4, 1)	1685258	4515		1.36619e+06	0.804105	0.195895
	2 cell(5, 1)	1324228	4811		984239	0.579299	0.420701
	2 cell(6, 1)	994763	4967		643749	0.378895	0.621105
	2 cell(7, 1)	748042	5160		383389	0.225654	0.774346
	2 cell(8, 1)	596944	5354		218581	0.128652	0.871348
	2 cell(9, 1)	584238	5525		193791	0.114061	0.885939
	2 cell(10, 1)	495208	5676		94089.7	0.0553789	0.944621
30 bp	3 cell(1, 1)	1998327	7744		1.45106e+06	1	0
	3 cell(2, 1)	1873415	7419		1.34912e+06	0.929745	0.070255
	3 cell(3, 1)	1820718	7225		1.31013e+06	0.902877	0.0971229
	3 cell(4, 1)	1756103	6955		1.2646e+06	0.871497	0.128503
	3 cell(5, 1)	1695261	6761		1.21747e+06	0.839016	0.160984
	3 cell(6, 1)	1505449	6516		1.04497e+06	0.720139	0.279861
	3 cell(7, 1)	1244172	6195		806376	0.555714	0.444286
	3 cell(8, 1)	938995	6000		514980	0.354898	0.645102
	3 cell(9, 1)	834244	5721		429946	0.296297	0.703703
	3 cell(10, 1)	530318	5525		139871	0.0963918	0.903608
20 bp	4 cell(1, 1)	2878300	9880		2.18009e+06	1	0
	4 cell(2, 1)	2835741	9880		2.13753e+06	0.980478	0.0195217
	4 cell(3, 1)	2824850	9804		2.13201e+06	0.977946	0.0220538
	4 cell(4, 1)	2812656	9880		2.11444e+06	0.969889	0.0301107
	4 cell(5, 1)	2806508	9880		2.1083e+06	0.967069	0.0329308
	4 cell(6, 1)	2660462	9880		1.96225e+06	0.900078	0.0999216
	4 cell(7, 1)	2479227	9880		1.78102e+06	0.816946	0.183054
	4 cell(8, 1)	2207431	9804		1.51459e+06	0.694738	0.305262
	4 cell(9, 1)	2082352	9880		1.38414e+06	0.634901	0.365099
	4 cell(10, 1)	1436340	9880		738128	0.338577	0.661423
10 bp	5 cell(1, 1)	3226028	16512		2.05914e+06	1	0
	5 cell(2, 1)	3114641	16384		1.9568e+06	0.950299	0.0497011
	5 cell(3, 1)	3083596	16512		1.91671e+06	0.930829	0.0691707
	5 cell(4, 1)	3031321	16384		1.87348e+06	0.909835	0.0901646
	5 cell(5, 1)	3074226	16512		1.90734e+06	0.926279	0.0737211
	5 cell(6, 1)	2934807	16512		1.76792e+06	0.858571	0.141429
	5 cell(7, 1)	2829368	16384		1.67152e+06	0.811759	0.188241
	5 cell(8, 1)	2920983	16512		1.75409e+06	0.851858	0.148142
	5 cell(9, 1)	2929226	16384		1.77138e+06	0.860254	0.139746
	5 cell(10, 1)	3010457	16512		1.84357e+06	0.89531	0.10469
Background	6	950642	13452		0
