# Supplementary material for: A novel single alpha-helix DNA-binding domain in CAF-1 promotes gene silencing and DNA damage survival through tetrasome-length DNA selectivity and spacer function
Source: eLife journal article supplement (doi:10.7554/elife.83538), 2023-06-14
Supplement: fig4-data1 [file 220128 Cy5 ladder EMSA with yCAF1 EDtoGSL_n2_Table.xlsx]

## Sheet: 220128 Cy5 ladder EMSA with yCA
	Name	Volume	Background	Background Level	Background Type	Median Intensity	Average Intensity	Mode Intensity	Std Dev	Variance	Min Intensity	Max Intensity	Percent	Area > Background	Centre X	Centre Y	Width	Height	Area	Comment
	1 cell(1, 1)	2530380	0	0	None	387.5	405.51	102	254.83	64938.9	1121	73	2.45	6240	596	1758	130	48	6240
	1 cell(2, 1)	2386312	0	0	None	339.5	382.42	116	251.66	63335.2	1070	67	2.31	6240	726	1758	130	48	6240
	1 cell(3, 1)	1778158	0	0	None	256	282.79	126	163.12	26606.9	704	68	1.72	6288	856	1758	131	48	6288
	1 cell(4, 1)	1441605	0	0	None	207	231.03	118	121.45	14749.7	564	60	1.4	6240	987	1758	130	48	6240
	1 cell(5, 1)	954619	0	0	None	137	152.98	105	60.11	3612.71	312	43	0.92	6240	1117	1758	130	48	6240
	1 cell(6, 1)	754949	0	0	None	118	120.99	100	28.44	809.09	192	58	0.73	6240	1247	1758	130	48	6240
	1 cell(7, 1)	659663	0	0	None	104	105.72	111	21.99	483.78	179	58	0.64	6240	1377	1758	130	48	6240
	1 cell(8, 1)	636380	0	0	None	98	101.21	91	19.55	382.17	215	56	0.62	6288	1507	1758	131	48	6288
	1 cell(9, 1)	631973	0	0	None	96	101.28	87	21.97	482.87	168	48	0.61	6240	1638	1758	130	48	6240
	1 cell(10, 1)	581435	0	0	None	93	93.18	97	12.57	158.09	133	55	0.56	6240	1768	1758	130	48	6240
	2 cell(1, 1)	2728467	0	0	None	356	400.54	107	215.59	46479.7	961	65	2.64	6812	596	1811	131	52	6812
	2 cell(2, 1)	2561897	0	0	None	335	378.98	103	205.51	42236.1	912	72	2.48	6760	727	1811	130	52	6760
	2 cell(3, 1)	2256008	0	0	None	295	331.18	207	171.19	29306.8	759	73	2.19	6812	857	1811	131	52	6812
	2 cell(4, 1)	2113263	0	0	None	282	312.61	93	161.68	26140.1	725	66	2.05	6760	988	1811	130	52	6760
	2 cell(5, 1)	1658435	0	0	None	212	243.46	172	117.03	13694.9	529	60	1.61	6812	1118	1811	131	52	6812
	2 cell(6, 1)	1215394	0	0	None	165	178.42	123	67.23	4519.93	359	59	1.18	6812	1249	1811	131	52	6812
	2 cell(7, 1)	943364	0	0	None	135	139.55	114	40.04	1603	240	56	0.91	6760	1380	1811	130	52	6760
	2 cell(8, 1)	819159	0	0	None	119	120.25	109	26.03	677.66	207	54	0.79	6812	1510	1811	131	52	6812
	2 cell(9, 1)	738217	0	0	None	106	109.2	101	21.41	458.53	175	57	0.72	6760	1641	1811	130	52	6760
	2 cell(10, 1)	638909	0	0	None	95	93.79	95	12.53	156.92	133	43	0.62	6812	1771	1811	131	52	6812
	3 cell(1, 1)	2097056	0	0	None	218	254	176	115.55	13351.2	581	78	2.03	8256	601	1871	129	64	8256
	3 cell(2, 1)	2079203	0	0	None	214.5	249.9	168	111.45	12421.9	586	72	2.01	8320	731	1871	130	64	8320
	3 cell(3, 1)	1961594	0	0	None	208	237.6	154	108.87	11853.8	543	69	1.9	8256	860	1871	129	64	8256
	3 cell(4, 1)	1987202	0	0	None	212	238.85	158	108.74	11825.4	539	65	1.92	8320	990	1871	130	64	8320
	3 cell(5, 1)	1885480	0	0	None	205	228.38	157	102.74	10554.8	523	67	1.83	8256	1119	1871	129	64	8256
	3 cell(6, 1)	1734336	0	0	None	183	210.07	141	90.36	8165.21	455	59	1.68	8256	1248	1871	129	64	8256
	3 cell(7, 1)	1599628	0	0	None	165	192.26	137	83.09	6904.09	419	63	1.55	8320	1378	1871	130	64	8320
	3 cell(8, 1)	1384101	0	0	None	151	167.65	118	64.04	4100.76	354	61	1.34	8256	1507	1871	129	64	8256
	3 cell(9, 1)	1166748	0	0	None	128	140.23	113	46.02	2118.14	281	59	1.13	8320	1637	1871	130	64	8320
	3 cell(10, 1)	821762	0	0	None	99	99.54	101	16.1	259.24	154	50	0.8	8256	1766	1871	129	64	8256
	4 cell(1, 1)	3120117	0	0	None	187	285.73	121	229.22	52540.6	1094	72	3.02	10920	592	1953	130	84	10920
	4 cell(2, 1)	3084577	0	0	None	186	282.47	114	216.63	46929.3	1026	76	2.99	10920	722	1953	130	84	10920
	4 cell(3, 1)	2997977	0	0	None	179	272.44	110	208.54	43490.4	983	73	2.9	11004	852	1953	131	85	11004
	4 cell(4, 1)	3042988	0	0	None	187	278.66	113	210.8	44436.9	950	67	2.95	10920	983	1954	130	84	10920
	4 cell(5, 1)	2972260	0	0	None	183	272.18	104	209.06	43707.8	926	62	2.88	10920	1113	1954	130	84	10920
	4 cell(6, 1)	2844380	0	0	None	179	260.47	108	194.44	37807.2	817	64	2.76	10920	1243	1954	130	84	10920
	4 cell(7, 1)	2778040	0	0	None	171	254.4	110	193.14	37303.1	831	66	2.69	10920	1373	1954	130	84	10920
	4 cell(8, 1)	2544132	0	0	None	151	231.2	111	174.92	30595.6	785	57	2.46	11004	1503	1954	131	85	11004
	4 cell(9, 1)	2223193	0	0	None	133	203.59	110	151.98	23097.7	699	68	2.15	10920	1634	1955	130	84	10920
	4 cell(10, 1)	1563261	0	0	None	113	143.16	98	76.52	5855.96	439	60	1.51	10920	1764	1955	130	84	10920
	5 cell(1, 1)	3288505	0	0	None	152	223.62	119	169.26	28647.4	922	53	3.19	14706	595	2072	129	114	14706
	5 cell(2, 1)	3264749	0	0	None	154	222	102	156.65	24539.4	781	56	3.16	14706	724	2072	129	114	14706
	5 cell(3, 1)	3173564	0	0	None	145	214.14	107	152.52	23263.2	761	63	3.07	14820	854	2072	130	114	14820
	5 cell(4, 1)	3132104	0	0	None	145	212.98	102	153.99	23714.3	758	63	3.03	14706	983	2072	129	114	14706
	5 cell(5, 1)	3016812	0	0	None	138	205.14	97	150.8	22741.9	719	54	2.92	14706	1112	2072	129	114	14706
	5 cell(6, 1)	2987146	0	0	None	139	203.12	104	147.29	21694.8	686	55	2.89	14706	1241	2072	129	114	14706
	5 cell(7, 1)	2945305	0	0	None	129	200.28	95	153.66	23610.8	718	59	2.85	14706	1370	2072	129	114	14706
	5 cell(8, 1)	2921812	0	0	None	125	197.15	97	155.9	24303.3	738	55	2.83	14820	1500	2072	130	114	14820
	5 cell(9, 1)	2872674	0	0	None	126	195.34	92	153.59	23588.8	742	46	2.78	14706	1629	2072	129	114	14706
	5 cell(10, 1)	2968737	0	0	None	125	201.87	100	178.66	31919.2	981	54	2.88	14706	1758	2072	129	114	14706
	6	752824	0	0	None	74	73.98	71	8.52	72.57	102	38	0.73	10176	592	1479	106	96	10176

## Sheet: Sheet1
		Volume	Area		Minus Backg.	Normalization	Bound apparent
50bp	1 cell(1, 1)	2530380	6240		2.06874e+06	1	0
	1 cell(2, 1)	2386312	6240		1.92467e+06	0.93036	0.0696404
	1 cell(3, 1)	1778158	6288		1.31297e+06	0.63467	0.36533
	1 cell(4, 1)	1441605	6240		979968	0.473702	0.526298
	1 cell(5, 1)	954619	6240		492982	0.2383	0.7617
	1 cell(6, 1)	754949	6240		293312	0.141783	0.858217
	1 cell(7, 1)	659663	6240		198026	0.0957227	0.904277
	1 cell(8, 1)	636380	6288		171192	0.0827515	0.917248
	1 cell(9, 1)	631973	6240		170336	0.0823378	0.917662
	1 cell(10, 1)	581435	6240		119798	0.0579084	0.942092
40bp	2 cell(1, 1)	2728467	6812		2.22451e+06	1	0
	2 cell(2, 1)	2561897	6760		2.06179e+06	0.92685	0.07315
	2 cell(3, 1)	2256008	6812		1.75205e+06	0.787612	0.212388
	2 cell(4, 1)	2113263	6760		1.61316e+06	0.725173	0.274827
	2 cell(5, 1)	1658435	6812		1.15448e+06	0.518981	0.481019
	2 cell(6, 1)	1215394	6812		711440	0.319818	0.680182
	2 cell(7, 1)	943364	6760		443257	0.19926	0.80074
	2 cell(8, 1)	819159	6812		315205	0.141696	0.858304
	2 cell(9, 1)	738217	6760		238110	0.107039	0.892961
	2 cell(10, 1)	638909	6812		134955	0.0606672	0.939333
30 bp	3 cell(1, 1)	2097056	8256		1.48627e+06	1	0
	3 cell(2, 1)	2079203	8320		1.46369e+06	0.984802	0.0151976
	3 cell(3, 1)	1961594	8256		1.35081e+06	0.908858	0.091142
	3 cell(4, 1)	1987202	8320		1.37169e+06	0.922902	0.077098
	3 cell(5, 1)	1885480	8256		1.2747e+06	0.857647	0.142353
	3 cell(6, 1)	1734336	8256		1.12355e+06	0.755954	0.244046
	3 cell(7, 1)	1599628	8320		984112	0.662133	0.337867
	3 cell(8, 1)	1384101	8256		773319	0.520307	0.479693
	3 cell(9, 1)	1166748	8320		551232	0.370881	0.629119
	3 cell(10, 1)	821762	8256		210980	0.141952	0.858048
20 bp	4 cell(1, 1)	3120117	10920		2.31225e+06	1	0
	4 cell(2, 1)	3084577	10920		2.27671e+06	0.98463	0.0153703
	4 cell(3, 1)	2997977	11004		2.1839e+06	0.944489	0.0555105
	4 cell(4, 1)	3042988	10920		2.23512e+06	0.966643	0.0333567
	4 cell(5, 1)	2972260	10920		2.16439e+06	0.936055	0.063945
	4 cell(6, 1)	2844380	10920		2.03651e+06	0.88075	0.11925
	4 cell(7, 1)	2778040	10920		1.97017e+06	0.852059	0.147941
	4 cell(8, 1)	2544132	11004		1.73005e+06	0.748211	0.251789
	4 cell(9, 1)	2223193	10920		1.41533e+06	0.612099	0.387901
	4 cell(10, 1)	1563261	10920		755396	0.326693	0.673307
10 bp	5 cell(1, 1)	3288505	14706		2.20055e+06	1	0
	5 cell(2, 1)	3264749	14706		2.17679e+06	0.989205	0.0107955
	5 cell(3, 1)	3173564	14820		2.07718e+06	0.943935	0.0560654
	5 cell(4, 1)	3132104	14706		2.04415e+06	0.928926	0.0710736
	5 cell(5, 1)	3016812	14706		1.92886e+06	0.876534	0.123466
	5 cell(6, 1)	2987146	14706		1.89919e+06	0.863053	0.136947
	5 cell(7, 1)	2945305	14706		1.85735e+06	0.844039	0.155961
	5 cell(8, 1)	2921812	14820		1.82542e+06	0.82953	0.17047
	5 cell(9, 1)	2872674	14706		1.78472e+06	0.811033	0.188967
	5 cell(10, 1)	2968737	14706		1.88078e+06	0.854687	0.145313
Background	6	752824	10176		0
