# Supplementary material for: A novel single alpha-helix DNA-binding domain in CAF-1 promotes gene silencing and DNA damage survival through tetrasome-length DNA selectivity and spacer function
Source: eLife journal article supplement (doi:10.7554/elife.83538), 2023-06-14
Supplement: fig5-data1 [file 220324 Cy5 ladder EMSA with yCAF1 2xKER_n1_Table.xlsx]

## Sheet: 220324 Cy5 ladder EMSA with yCA
	Name	Volume	Background	Background Level	Background Type	Median Intensity	Average Intensity	Mode Intensity	Std Dev	Variance	Min Intensity	Max Intensity	Percent	Area > Background	Centre X	Centre Y	Width	Height	Area	Comment
	1 cell(1, 1)	2365315	0	0	None	484	523.07	86	365.83	133832	1422	53	3.24	4522	458	1330	133	34	4522
	1 cell(2, 1)	1654012	0	0	None	348	365.77	85	227.8	51892.8	977	57	2.27	4522	591	1330	133	34	4522
	1 cell(3, 1)	705255	0	0	None	156	155.96	163	49.37	2437.24	311	50	0.97	4522	724	1330	133	35	4522
	1 cell(4, 1)	513784	0	0	None	110	113.62	109	22.07	486.92	209	55	0.7	4522	857	1331	133	34	4522
	1 cell(5, 1)	498392	0	0	None	106	110.21	102	23.37	546.29	188	60	0.68	4522	990	1331	133	34	4522
	1 cell(6, 1)	441940	0	0	None	94	97.73	91	17.91	320.87	159	57	0.61	4522	1123	1331	133	34	4522
	1 cell(7, 1)	423583	0	0	None	93	93.67	96	14.65	214.61	228	50	0.58	4522	1256	1331	133	34	4522
	1 cell(8, 1)	357255	0	0	None	79	79	81	8.87	78.69	107	49	0.49	4522	1389	1331	133	35	4522
	1 cell(9, 1)	355256	0	0	None	78	78.56	77	13.26	175.85	399	53	0.49	4522	1522	1332	133	34	4522
	1 cell(10, 1)	333715	0	0	None	74	73.8	75	8.63	74.53	99	40	0.46	4522	1655	1332	133	34	4522
	2 cell(1, 1)	2579303	0	0	None	505	538.48	84	338.6	114651	1354	55	3.54	4790	452	1363	136	36	4790
	2 cell(2, 1)	2193312	0	0	None	408	457.7	112	261.85	68565.3	1140	70	3.01	4792	586	1363	136	37	4792
	2 cell(3, 1)	1056604	0	0	None	209	218.94	93	89.89	8079.52	471	69	1.45	4826	720	1364	137	36	4826
	2 cell(4, 1)	652185	0	0	None	127	136.1	119	35.13	1234.32	250	64	0.89	4792	855	1364	136	37	4792
	2 cell(5, 1)	561344	0	0	None	112	117.19	111	26.94	726.02	223	58	0.77	4790	989	1365	136	36	4790
	2 cell(6, 1)	495616	0	0	None	102	103.47	101	20.16	406.41	190	58	0.68	4790	1123	1365	136	36	4790
	2 cell(7, 1)	458621	0	0	None	96	95.71	98	14.47	209.52	178	53	0.63	4792	1257	1365	136	37	4792
	2 cell(8, 1)	384996	0	0	None	80	79.78	79	9.69	93.94	115	49	0.53	4826	1391	1366	137	36	4826
	2 cell(9, 1)	375640	0	0	None	78.5	78.39	80	8.77	76.97	110	38	0.51	4792	1526	1366	136	37	4792
	2 cell(10, 1)	357687	0	0	None	75	74.67	74	8.99	80.83	109	42	0.49	4790	1660	1367	136	36	4790
	3 cell(1, 1)	1827124	0	0	None	325	343.44	88	193.36	37386.7	823	58	2.5	5320	452	1399	133	41	5320
	3 cell(2, 1)	1777705	0	0	None	292	334.16	203	177.44	31485	872	84	2.44	5320	585	1400	133	41	5320
	3 cell(3, 1)	1558975	0	0	None	264	298.31	100	158.96	25269.3	800	71	2.14	5226	719	1401	134	40	5226
	3 cell(4, 1)	1054799	0	0	None	188	203.35	135	79.71	6353.74	428	68	1.45	5187	852	1402	133	40	5187
	3 cell(5, 1)	728603	0	0	None	135	140.47	125	38.42	1476.2	292	64	1	5187	985	1403	133	40	5187
	3 cell(6, 1)	598352	0	0	None	113	115.36	114	23.77	564.82	194	61	0.82	5187	1118	1404	133	40	5187
	3 cell(7, 1)	528073	0	0	None	102	101.81	103	14.68	215.48	184	53	0.72	5187	1251	1405	133	40	5187
	3 cell(8, 1)	434014	0	0	None	85	85.23	84	9.69	93.82	119	51	0.59	5092	1385	1405	134	39	5092
	3 cell(9, 1)	410344	0	0	None	81	81.19	82	10	99.99	182	51	0.56	5054	1518	1406	133	39	5054
	3 cell(10, 1)	390535	0	0	None	77	77.27	77	9.27	85.98	111	44	0.54	5054	1651	1407	133	39	5054
	4 cell(1, 1)	2707517	0	0	None	239	391.49	83	364.84	133110	1638	56	3.71	6916	452	1447	133	52	6916
	4 cell(2, 1)	2723920	0	0	None	255	396.84	126	334.26	111733	1538	83	3.73	6864	585	1447	132	52	6864
	4 cell(3, 1)	2664254	0	0	None	240	385.23	119	322.66	104111	1512	80	3.65	6916	717	1447	133	53	6916
	4 cell(4, 1)	2478947	0	0	None	213	361.15	125	310.61	96479.1	1352	67	3.4	6864	850	1448	132	52	6864
	4 cell(5, 1)	1878933	0	0	None	181	271.68	95	201.21	40487.5	943	70	2.58	6916	982	1448	133	52	6916
	4 cell(6, 1)	1800021	0	0	None	183	260.27	135	173.68	30165.2	703	64	2.47	6916	1115	1448	133	52	6916
	4 cell(7, 1)	1587178	0	0	None	161	231.23	116	152.67	23307	669	62	2.18	6864	1248	1448	132	52	6864
	4 cell(8, 1)	994838	0	0	None	120	143.85	95	64.45	4153.59	351	57	1.36	6916	1380	1448	133	53	6916
	4 cell(9, 1)	825007	0	0	None	108	120.19	89	41.21	1698.22	257	53	1.13	6864	1513	1449	132	52	6864
	4 cell(10, 1)	707985	0	0	None	97	102.37	79	25.74	662.74	279	52	0.97	6916	1645	1449	133	52	6916
	5 cell(1, 1)	2950945	0	0	None	100	229.86	84	283.23	80217.5	1652	55	4.05	12838	455	1524	131	98	12838
	5 cell(2, 1)	2974338	0	0	None	124	229.93	84	254.91	64978	1378	54	4.08	12936	587	1524	132	98	12936
	5 cell(3, 1)	2870778	0	0	None	110	223.62	82	248.35	61680	1351	54	3.94	12838	718	1524	131	98	12838
	5 cell(4, 1)	2730398	0	0	None	113	211.07	80	202.02	40812.4	1119	50	3.74	12936	850	1524	132	98	12936
	5 cell(5, 1)	2690337	0	0	None	122	209.56	81	184.27	33957.2	898	50	3.69	12838	981	1524	131	98	12838
	5 cell(6, 1)	2726576	0	0	None	127	212.38	86	188.83	35656.2	903	56	3.74	12838	1112	1524	131	98	12838
	5 cell(7, 1)	2638587	0	0	None	121	203.97	86	181.6	32979.7	845	49	3.62	12936	1244	1524	132	98	12936
	5 cell(8, 1)	2567836	0	0	None	114	200.02	83	184.94	34204.6	901	51	3.52	12838	1375	1523	131	99	12838
	5 cell(9, 1)	2615796	0	0	None	113	202.21	82	203.97	41604.3	2847	36	3.59	12936	1507	1523	132	98	12936
	5 cell(10, 1)	2473062	0	0	None	110	192.64	87	189.72	35992.7	1077	44	3.39	12838	1638	1522	131	99	12838
	6	1267416	0	0	None	85	85.34	87	10.19	103.87	142	46	1.74	14852	553	1676	158	94	14852

## Sheet: Sheet1
		Volume	Area		Minus Backg.	Normalization	Bound apparent
50bp	1 cell(1, 1)	2365315	4522		2031600	1	0
	1 cell(2, 1)	1654012	4522		1320297	0.64988	0.35012
	1 cell(3, 1)	705255	4522		371540	0.18288	0.81712
	1 cell(4, 1)	513784	4522		180069	0.0886341	0.911366
	1 cell(5, 1)	498392	4522		164677	0.0810578	0.918942
	1 cell(6, 1)	441940	4522		108225	0.0532708	0.946729
	1 cell(7, 1)	423583	4522		89868	0.0442351	0.955765
	1 cell(8, 1)	357255	4522		23540	0.0115869	0.988413
	1 cell(9, 1)	355256	4522		21541	0.010603	0.989397
	1 cell(10, 1)	333715	4522		0	0	1
40bp	2 cell(1, 1)	2579303	4790		2221616	1	0
	2 cell(2, 1)	2193312	4792		1835625	0.826257	0.173743
	2 cell(3, 1)	1056604	4826		698917	0.314598	0.685402
	2 cell(4, 1)	652185	4792		294498	0.13256	0.86744
	2 cell(5, 1)	561344	4790		203657	0.0916707	0.908329
	2 cell(6, 1)	495616	4790		137929	0.062085	0.937915
	2 cell(7, 1)	458621	4792		100934	0.0454327	0.954567
	2 cell(8, 1)	384996	4826		27309	0.0122924	0.987708
	2 cell(9, 1)	375640	4792		17953	0.00808105	0.991919
	2 cell(10, 1)	357687	4790		0	0	1
30 bp	3 cell(1, 1)	1827124	5320		1436589	1	0
	3 cell(2, 1)	1777705	5320		1387170	0.9656	0.0344002
	3 cell(3, 1)	1558975	5226		1168440	0.813343	0.186657
	3 cell(4, 1)	1054799	5187		664264	0.46239	0.53761
	3 cell(5, 1)	728603	5187		338068	0.235327	0.764673
	3 cell(6, 1)	598352	5187		207817	0.14466	0.85534
	3 cell(7, 1)	528073	5187		137538	0.0957393	0.904261
	3 cell(8, 1)	434014	5092		43479	0.0302654	0.969735
	3 cell(9, 1)	410344	5054		19809	0.0137889	0.986211
	3 cell(10, 1)	390535	5054		0	0	1
20 bp	4 cell(1, 1)	2707517	6916		2.11733e+06	0.990253	0.00974688
	4 cell(2, 1)	2723920	6864		2.13817e+06	1	0
	4 cell(3, 1)	2664254	6916		2.07407e+06	0.970019	0.0299805
	4 cell(4, 1)	2478947	6864		1.8932e+06	0.885429	0.114571
	4 cell(5, 1)	1878933	6916		1.28875e+06	0.602733	0.397267
	4 cell(6, 1)	1800021	6916		1.20983e+06	0.565827	0.434173
	4 cell(7, 1)	1587178	6864		1.00143e+06	0.468358	0.531642
	4 cell(8, 1)	994838	6916		404652	0.189251	0.810749
	4 cell(9, 1)	825007	6864		239258	0.111898	0.888102
	4 cell(10, 1)	707985	6916		117799	0.0550931	0.944907
10 bp	5 cell(1, 1)	2950945	12838		1.8554e+06	0.991964	0.00803562
	5 cell(2, 1)	2974338	12936		1.87043e+06	1	0
	5 cell(3, 1)	2870778	12838		1.77523e+06	0.949104	0.0508959
	5 cell(4, 1)	2730398	12936		1.62649e+06	0.869581	0.130419
	5 cell(5, 1)	2690337	12838		1.59479e+06	0.852634	0.147366
	5 cell(6, 1)	2726576	12838		1.63103e+06	0.872008	0.127992
	5 cell(7, 1)	2638587	12936		1.53468e+06	0.820495	0.179505
	5 cell(8, 1)	2567836	12838		1.47229e+06	0.78714	0.21286
	5 cell(9, 1)	2615796	12936		1.51188e+06	0.80831	0.19169
	5 cell(10, 1)	2473062	12838		1.37751e+06	0.73647	0.26353
Background	6	1267416	14852		0
