# Supplementary material for: A novel single alpha-helix DNA-binding domain in CAF-1 promotes gene silencing and DNA damage survival through tetrasome-length DNA selectivity and spacer function
Source: eLife journal article supplement (doi:10.7554/elife.83538), 2023-06-14
Supplement: fig5-data1 [file 220324 Cy5 ladder EMSA with yCAF1 2xKER_n2_Table_2.xlsx]

## Sheet: 220324 Cy5 ladder EMSA with yCA
	Name	Volume	Background	Background Level	Background Type	Median Intensity	Average Intensity	Mode Intensity	Std Dev	Variance	Min Intensity	Max Intensity	Percent	Area > Background	Centre X	Centre Y	Width	Height	Area	Comment
	1 cell(1, 1)	2277605	0	0	None	419.5	479.29	141	318.81	101639	1280	61	2.92	4752	459	1397	132	36	4752
	1 cell(2, 1)	1957181	0	0	None	359	411.86	128	267.69	71658.7	1161	75	2.51	4752	591	1397	132	36	4752
	1 cell(3, 1)	714742	0	0	None	132	149.28	106	57.16	3267.01	349	65	0.92	4788	723	1397	133	36	4788
	1 cell(4, 1)	519170	0	0	None	106	109.25	93	21.68	470.13	208	65	0.67	4752	856	1397	132	36	4752
	1 cell(5, 1)	477318	0	0	None	97.5	100.45	86	16.64	277	161	62	0.61	4752	988	1397	132	36	4752
	1 cell(6, 1)	478517	0	0	None	95	100.7	90	19.14	366.27	167	59	0.61	4752	1120	1397	132	36	4752
	1 cell(7, 1)	475247	0	0	None	99	100.01	90	14.55	211.63	145	61	0.61	4752	1252	1397	132	36	4752
	1 cell(8, 1)	400119	0	0	None	84	83.57	85	9.83	96.55	192	50	0.51	4788	1384	1397	133	36	4788
	1 cell(9, 1)	370492	0	0	None	78	77.97	79	8.89	79.07	122	45	0.48	4752	1517	1397	132	36	4752
	1 cell(10, 1)	343942	0	0	None	72	72.38	74	8.39	70.47	106	47	0.44	4752	1649	1397	132	36	4752
	2 cell(1, 1)	2262125	0	0	None	501	535.54	84	288.2	83060.6	1237	55	2.9	4224	460	1434	132	32	4224
	2 cell(2, 1)	2043735	0	0	None	457	483.84	106	262.08	68683.8	1135	71	2.62	4224	592	1434	132	32	4224
	2 cell(3, 1)	1144767	0	0	None	230	271.01	174	134.83	18178.4	660	70	1.47	4224	724	1434	132	32	4224
	2 cell(4, 1)	592899	0	0	None	132	140.36	117	42.78	1830.05	294	55	0.76	4224	856	1434	132	32	4224
	2 cell(5, 1)	461678	0	0	None	104	109.3	99	22.6	510.93	180	58	0.59	4224	988	1434	132	32	4224
	2 cell(6, 1)	455678	0	0	None	104	107.88	97	19.68	387.47	169	57	0.58	4224	1120	1434	132	32	4224
	2 cell(7, 1)	425536	0	0	None	100	100.74	101	13.15	172.93	141	64	0.55	4224	1252	1434	132	32	4224
	2 cell(8, 1)	356589	0	0	None	84.5	84.42	87	8.84	78.19	110	56	0.46	4224	1384	1434	132	32	4224
	2 cell(9, 1)	325708	0	0	None	77	77.11	77	8.28	68.54	104	49	0.42	4224	1516	1434	132	32	4224
	2 cell(10, 1)	316925	0	0	None	75	75.03	76	8.7	75.69	129	46	0.41	4224	1648	1434	132	32	4224
	3 cell(1, 1)	2138987	0	0	None	287	326.56	215	164.75	27141.4	832	57	2.74	6550	463	1475	131	50	6550
	3 cell(2, 1)	2009750	0	0	None	265	306.83	197	157.49	24802.8	787	74	2.58	6550	594	1475	131	50	6550
	3 cell(3, 1)	1986636	0	0	None	265	301.01	105	159.81	25539.3	784	72	2.55	6600	726	1475	132	50	6600
	3 cell(4, 1)	1537277	0	0	None	194.5	234.7	141	119.54	14290.8	593	66	1.97	6550	857	1475	131	50	6550
	3 cell(5, 1)	865692	0	0	None	124	132.17	108	34.77	1209	276	66	1.11	6550	988	1475	131	50	6550
	3 cell(6, 1)	743058	0	0	None	112	113.44	108	19.69	387.64	169	62	0.95	6550	1119	1475	131	50	6550
	3 cell(7, 1)	650389	0	0	None	99	99.3	102	12.92	166.82	140	59	0.83	6550	1250	1475	131	50	6550
	3 cell(8, 1)	561497	0	0	None	85	85.08	86	9.3	86.52	127	44	0.72	6600	1382	1475	132	50	6600
	3 cell(9, 1)	525131	0	0	None	80	80.17	85	9.23	85.17	118	46	0.67	6550	1513	1475	131	50	6550
	3 cell(10, 1)	500322	0	0	None	76	76.39	73	9.12	83.13	145	43	0.64	6550	1644	1475	131	50	6550
	4 cell(1, 1)	2938917	0	0	None	187	313.99	109	278.86	77760.6	1455	73	3.77	9360	473	1536	130	72	9360
	4 cell(2, 1)	2812376	0	0	None	195	302.8	121	238.12	56702.6	1061	72	3.61	9288	602	1536	129	72	9288
	4 cell(3, 1)	2914379	0	0	None	200	311.37	107	248.43	61716.9	1136	75	3.74	9360	732	1536	130	72	9360
	4 cell(4, 1)	2722298	0	0	None	188	293.1	106	230.36	53064.5	1073	62	3.49	9288	861	1536	129	72	9288
	4 cell(5, 1)	2344313	0	0	None	167	250.46	94	193.16	37309.1	834	65	3.01	9360	991	1536	130	72	9360
	4 cell(6, 1)	2143546	0	0	None	146	229.01	109	174.58	30477.7	777	70	2.75	9360	1121	1536	130	72	9360
	4 cell(7, 1)	1766396	0	0	None	125	190.18	103	134.03	17963.3	641	63	2.27	9288	1250	1536	129	72	9288
	4 cell(8, 1)	1142881	0	0	None	101	122.1	88	52.43	2748.79	323	56	1.47	9360	1380	1536	130	72	9360
	4 cell(9, 1)	1005824	0	0	None	96	108.29	85	35.69	1273.79	252	55	1.29	9288	1509	1536	129	72	9288
	4 cell(10, 1)	868351	0	0	None	90	92.77	87	17.41	303.07	249	50	1.11	9360	1639	1536	130	72	9360
	5 cell(1, 1)	3165664	0	0	None	133	227.98	87	216.94	47063.9	1194	56	4.06	13886	461	1627	131	106	13886
	5 cell(2, 1)	3041962	0	0	None	140	219.07	87	182.58	33334.1	894	57	3.9	13886	592	1627	131	106	13886
	5 cell(3, 1)	3004529	0	0	None	130	216.37	84	191.07	36507.4	919	54	3.85	13886	723	1627	131	106	13886
	5 cell(4, 1)	2861485	0	0	None	125	206.07	83	177.84	31628.4	843	50	3.67	13886	854	1627	131	106	13886
	5 cell(5, 1)	2719695	0	0	None	119	195.86	77	165.37	27346.8	792	53	3.49	13886	985	1627	131	106	13886
	5 cell(6, 1)	2753308	0	0	None	116	198.28	82	174.93	30599.7	808	52	3.53	13886	1116	1627	131	106	13886
	5 cell(7, 1)	2701804	0	0	None	110	194.57	84	178.58	31890.9	877	49	3.47	13886	1247	1627	131	106	13886
	5 cell(8, 1)	2562274	0	0	None	99	184.52	76	175.35	30747.9	831	50	3.29	13886	1378	1627	131	106	13886
	5 cell(9, 1)	2657523	0	0	None	96	191.38	73	194.78	37938	1014	45	3.41	13886	1509	1627	131	106	13886
	5 cell(10, 1)	2635519	0	0	None	92	189.8	79	211.93	44912.4	1207	45	3.38	13886	1640	1627	131	106	13886
	6	1260263	0	0	None	85	85.62	83	10.54	111.11	185	44	1.62	14720	582	1752	184	80	14720

## Sheet: App Fract Bound Free
		Volume	Area		Minus Backg.	Normalization	Bound apparent
50bp	1 cell(1, 1)	2277605	4752		1933663	1	0
	1 cell(2, 1)	1957181	4752		1613239	0.834292	0.165708
	1 cell(3, 1)	714742	4788		370800	0.19176	0.80824
	1 cell(4, 1)	519170	4752		175228	0.0906197	0.90938
	1 cell(5, 1)	477318	4752		133376	0.0689758	0.931024
	1 cell(6, 1)	478517	4752		134575	0.0695959	0.930404
	1 cell(7, 1)	475247	4752		131305	0.0679048	0.932095
	1 cell(8, 1)	400119	4788		56177	0.0290521	0.970948
	1 cell(9, 1)	370492	4752		26550	0.0137304	0.98627
	1 cell(10, 1)	343942	4752		0	0	1
40bp	2 cell(1, 1)	2262125	4224		1945200	1	0
	2 cell(2, 1)	2043735	4224		1726810	0.887729	0.112271
	2 cell(3, 1)	1144767	4224		827842	0.425582	0.574418
	2 cell(4, 1)	592899	4224		275974	0.141874	0.858126
	2 cell(5, 1)	461678	4224		144753	0.0744155	0.925585
	2 cell(6, 1)	455678	4224		138753	0.071331	0.928669
	2 cell(7, 1)	425536	4224		108611	0.0558354	0.944165
	2 cell(8, 1)	356589	4224		39664	0.0203907	0.979609
	2 cell(9, 1)	325708	4224		8783	0.00451522	0.995485
	2 cell(10, 1)	316925	4224		0	0	1
30 bp	3 cell(1, 1)	2138987	6550		1638665	1	0
	3 cell(2, 1)	2009750	6550		1509428	0.921133	0.0788672
	3 cell(3, 1)	1986636	6600		1486314	0.907027	0.0929726
	3 cell(4, 1)	1537277	6550		1036955	0.632805	0.367195
	3 cell(5, 1)	865692	6550		365370	0.222968	0.777032
	3 cell(6, 1)	743058	6550		242736	0.14813	0.85187
	3 cell(7, 1)	650389	6550		150067	0.0915788	0.908421
	3 cell(8, 1)	561497	6600		61175	0.0373322	0.962668
	3 cell(9, 1)	525131	6550		24809	0.0151398	0.98486
	3 cell(10, 1)	500322	6550		0	0	1
20 bp	4 cell(1, 1)	2938917	9360		2.13755e+06	1	0
	4 cell(2, 1)	2812376	9288		2.01718e+06	0.943685	0.0563151
	4 cell(3, 1)	2914379	9360		2.11302e+06	0.988521	0.0114795
	4 cell(4, 1)	2722298	9288		1.9271e+06	0.901544	0.0984558
	4 cell(5, 1)	2344313	9360		1.54295e+06	0.72183	0.27817
	4 cell(6, 1)	2143546	9360		1.34218e+06	0.627906	0.372094
	4 cell(7, 1)	1766396	9288		971197	0.45435	0.54565
	4 cell(8, 1)	1142881	9360		341518	0.159771	0.840229
	4 cell(9, 1)	1005824	9288		210625	0.0985357	0.901464
	4 cell(10, 1)	868351	9360		66988.1	0.0313387	0.968661
10 bp	5 cell(1, 1)	3165664	13886		1.9768e+06	1	0
	5 cell(2, 1)	3041962	13886		1.8531e+06	0.937423	0.0625767
	5 cell(3, 1)	3004529	13886		1.81567e+06	0.918487	0.0815129
	5 cell(4, 1)	2861485	13886		1.67263e+06	0.846126	0.153874
	5 cell(5, 1)	2719695	13886		1.53084e+06	0.774399	0.225601
	5 cell(6, 1)	2753308	13886		1.56445e+06	0.791403	0.208597
	5 cell(7, 1)	2701804	13886		1.51294e+06	0.765349	0.234651
	5 cell(8, 1)	2562274	13886		1.37341e+06	0.694765	0.305235
	5 cell(9, 1)	2657523	13886		1.46866e+06	0.742948	0.257052
	5 cell(10, 1)	2635519	13886		1.44666e+06	0.731817	0.268183
Background	6	1260263	14720		0
