# Supplementary material for: A novel single alpha-helix DNA-binding domain in CAF-1 promotes gene silencing and DNA damage survival through tetrasome-length DNA selectivity and spacer function
Source: eLife journal article supplement (doi:10.7554/elife.83538), 2023-06-14
Supplement: fig5-data1 [file 220324 Cy5 ladder EMSA with yCAF1 2xKER_n3_Table.xlsx]

## Sheet: 220324 Cy5 ladder EMSA with yCA
	Name	Volume	Background	Background Level	Background Type	Median Intensity	Average Intensity	Mode Intensity	Std Dev	Variance	Min Intensity	Max Intensity	Percent	Area > Background	Centre X	Centre Y	Width	Height	Area	Comment
	1 cell(1, 1)	2531505	0	0	None	409.5	453.19	79	310.96	96699	1242	53	3.26	5586	440	1452	133	42	5586
	1 cell(2, 1)	2222113	0	0	None	359	394.83	93	256.9	65998.9	1094	65	2.86	5628	574	1451	134	43	5628
	1 cell(3, 1)	1053736	0	0	None	182	188.64	109	73.88	5457.7	393	58	1.36	5586	707	1451	133	42	5586
	1 cell(4, 1)	712597	0	0	None	134	126.62	143	33.52	1123.5	208	52	0.92	5628	841	1450	134	43	5628
	1 cell(5, 1)	619944	0	0	None	113	110.98	112	18.74	351.13	183	60	0.8	5586	974	1449	133	43	5586
	1 cell(6, 1)	570027	0	0	None	101	102.05	106	17.06	291.04	164	57	0.73	5586	1107	1448	133	43	5586
	1 cell(7, 1)	545380	0	0	None	96	96.9	92	15.42	237.64	252	51	0.7	5628	1241	1447	134	43	5628
	1 cell(8, 1)	475926	0	0	None	85	85.2	86	10.31	106.38	172	52	0.61	5586	1374	1447	133	42	5586
	1 cell(9, 1)	460188	0	0	None	82	81.77	81	9.74	94.94	116	51	0.59	5628	1508	1446	134	43	5628
	1 cell(10, 1)	426409	0	0	None	76	76.35	77	9.11	82.99	157	43	0.55	5585	1641	1445	133	44	5585
	2 cell(1, 1)	2062722	0	0	None	455.5	488.1	85	303.31	91997.7	1167	47	2.66	4226	438	1489	135	32	4226
	2 cell(2, 1)	1944278	0	0	None	439	460.08	99	254.22	64627.5	1055	78	2.51	4226	571	1489	135	32	4226
	2 cell(3, 1)	1324807	0	0	None	309	311.13	207	127.87	16351.5	604	75	1.71	4258	705	1489	136	32	4258
	2 cell(4, 1)	695991	0	0	None	172	164.77	85	53.9	2905.65	306	61	0.9	4224	838	1488	135	33	4224
	2 cell(5, 1)	551352	0	0	None	131	130.47	129	24.69	609.67	204	63	0.71	4226	971	1488	135	32	4226
	2 cell(6, 1)	481514	0	0	None	111	113.94	105	19.22	369.42	182	62	0.62	4226	1104	1488	135	32	4226
	2 cell(7, 1)	415339	0	0	None	97	98.33	95	13.59	184.6	139	60	0.54	4224	1237	1487	135	33	4224
	2 cell(8, 1)	360973	0	0	None	84	84.78	83	9.1	82.84	115	52	0.47	4258	1371	1487	136	32	4258
	2 cell(9, 1)	348403	0	0	None	83	82.48	86	9.85	97.07	160	50	0.45	4224	1504	1486	135	33	4224
	2 cell(10, 1)	329673	0	0	None	78	78.05	81	9.18	84.23	109	44	0.42	4224	1637	1485	135	33	4224
	3 cell(1, 1)	1630985	0	0	None	268	291.98	79	162.14	26290.9	698	54	2.1	5586	437	1528	133	42	5586
	3 cell(2, 1)	1626539	0	0	None	263	291.18	201	141.51	20025.8	685	75	2.1	5586	570	1528	133	42	5586
	3 cell(3, 1)	1479634	0	0	None	245	262.91	161	112.52	12660	561	62	1.91	5628	704	1528	134	42	5628
	3 cell(4, 1)	1301460	0	0	None	216	232.99	92	114.73	13163.7	538	65	1.68	5586	837	1527	133	43	5586
	3 cell(5, 1)	890666	0	0	None	159	159.45	98	52.71	2777.94	324	64	1.15	5586	970	1527	133	42	5586
	3 cell(6, 1)	688171	0	0	None	124	123.2	133	23.03	530.41	191	66	0.89	5586	1103	1527	133	42	5586
	3 cell(7, 1)	591024	0	0	None	107	105.8	116	15.81	249.98	159	60	0.76	5586	1236	1526	133	43	5586
	3 cell(8, 1)	506033	0	0	None	90	89.91	90	10.17	103.46	148	50	0.65	5628	1370	1526	134	42	5628
	3 cell(9, 1)	482733	0	0	None	86	86.42	86	14.44	208.42	438	51	0.62	5586	1503	1525	133	43	5586
	3 cell(10, 1)	449235	0	0	None	81	80.42	84	8.68	75.29	130	47	0.58	5586	1636	1524	133	43	5586
	4 cell(1, 1)	2736300	0	0	None	178	296.14	85	269.15	72444	1276	52	3.53	9240	443	1584	132	70	9240
	4 cell(2, 1)	2698132	0	0	None	181	289.81	123	234.09	54797.7	1115	74	3.48	9310	575	1584	133	70	9310
	4 cell(3, 1)	2474475	0	0	None	172	267.8	99	202.09	40840.9	872	67	3.19	9240	708	1584	132	70	9240
	4 cell(4, 1)	2471754	0	0	None	169	265.49	101	199.39	39756.4	1037	64	3.19	9310	840	1584	133	70	9310
	4 cell(5, 1)	2324558	0	0	None	183	251.58	95	169.72	28803.9	687	69	3	9240	973	1584	132	70	9240
	4 cell(6, 1)	2092108	0	0	None	165	226.42	109	141.74	20091.3	604	59	2.7	9240	1105	1584	132	70	9240
	4 cell(7, 1)	1902955	0	0	None	148	204.4	108	124.63	15533.3	528	55	2.45	9310	1237	1584	133	70	9310
	4 cell(8, 1)	1381422	0	0	None	117	149.5	98	72.37	5238.09	363	61	1.78	9240	1370	1583	132	71	9240
	4 cell(9, 1)	1183073	0	0	None	103	127.08	88	54.64	2985.52	310	52	1.52	9310	1502	1583	133	70	9310
	4 cell(10, 1)	946300	0	0	None	96	102.41	88	23.85	568.82	187	57	1.22	9240	1635	1582	132	71	9240
	5 cell(1, 1)	2929877	0	0	None	88	166.89	79	177.02	31335.8	1060	45	3.78	17556	445	1685	133	132	17556
	5 cell(2, 1)	2915997	0	0	None	100	167.36	79	142.04	20176	759	50	3.76	17424	578	1685	132	132	17424
	5 cell(3, 1)	2808589	0	0	None	107	159.98	79	111.78	12495.6	688	46	3.62	17556	710	1685	133	132	17556
	5 cell(4, 1)	2832257	0	0	None	108	162.55	81	126.74	16062.9	715	50	3.65	17424	843	1685	132	132	17424
	5 cell(5, 1)	2831906	0	0	None	109	161.31	86	118.85	14125.1	585	52	3.65	17556	975	1685	133	132	17556
	5 cell(6, 1)	2761466	0	0	None	111	157.29	87	106.24	11287.1	532	47	3.56	17556	1108	1685	133	132	17556
	5 cell(7, 1)	2681540	0	0	None	112	153.9	91	97.67	9539.34	490	60	3.46	17424	1241	1685	132	132	17424
	5 cell(8, 1)	2858850	0	0	None	112	162.84	90	117.98	13919.3	597	58	3.68	17556	1373	1684	133	133	17556
	5 cell(9, 1)	2939675	0	0	None	114	168.71	97	127.6	16281.8	660	56	3.79	17424	1506	1684	132	132	17424
	5 cell(10, 1)	3001949	0	0	None	111	170.99	94	148.82	22147.3	855	54	3.87	17556	1638	1683	133	133	17556
	6	1031351	0	0	None	77	76.58	77	8.65	74.77	119	42	1.33	13468	856	1834	182	74	13468

## Sheet: Sheet1
		Volume	Area		Minus Backg.	Normalization	Bound apparent
50bp	1 cell(1, 1)	2531505	5586		2105096	1	0
	1 cell(2, 1)	2222113	5628		1795704	0.853027	0.146973
	1 cell(3, 1)	1053736	5586		627327	0.298004	0.701996
	1 cell(4, 1)	712597	5628		286188	0.13595	0.86405
	1 cell(5, 1)	619944	5586		193535	0.0919364	0.908064
	1 cell(6, 1)	570027	5586		143618	0.068224	0.931776
	1 cell(7, 1)	545380	5628		118971	0.0565157	0.943484
	1 cell(8, 1)	475926	5586		49517	0.0235224	0.976478
	1 cell(9, 1)	460188	5628		33779	0.0160463	0.983954
	1 cell(10, 1)	426409	5585		0	0	1
40bp	2 cell(1, 1)	2062722	4226		1.7391e+06	1	0
	2 cell(2, 1)	1944278	4226		1.62066e+06	0.931894	0.0681063
	2 cell(3, 1)	1324807	4258		998738	0.574283	0.425717
	2 cell(4, 1)	695991	4224		372526	0.214206	0.785794
	2 cell(5, 1)	551352	4226		227734	0.130949	0.869051
	2 cell(6, 1)	481514	4226		157896	0.0907915	0.909209
	2 cell(7, 1)	415339	4224		91874	0.0528284	0.947172
	2 cell(8, 1)	360973	4258		34904.4	0.0200703	0.97993
	2 cell(9, 1)	348403	4224		24938	0.0143396	0.98566
	2 cell(10, 1)	329673	4224		6208	0.00356965	0.99643
30 bp	3 cell(1, 1)	1630985	5586		1.20322e+06	1	0
	3 cell(2, 1)	1626539	5586		1.19877e+06	0.996305	0.00369508
	3 cell(3, 1)	1479634	5628		1.04865e+06	0.871539	0.128461
	3 cell(4, 1)	1301460	5586		873696	0.726131	0.273869
	3 cell(5, 1)	890666	5586		462902	0.384719	0.615281
	3 cell(6, 1)	688171	5586		260407	0.216425	0.783575
	3 cell(7, 1)	591024	5586		163260	0.135686	0.864314
	3 cell(8, 1)	506033	5628		75052.6	0.0623764	0.937624
	3 cell(9, 1)	482733	5586		54968.9	0.0456848	0.954315
	3 cell(10, 1)	449235	5586		21470.9	0.0178445	0.982155
20 bp	4 cell(1, 1)	2736300	9240		2.02872e+06	1	0
	4 cell(2, 1)	2698132	9310		1.98519e+06	0.978544	0.0214561
	4 cell(3, 1)	2474475	9240		1.7669e+06	0.870941	0.129059
	4 cell(4, 1)	2471754	9310		1.75881e+06	0.866957	0.133043
	4 cell(5, 1)	2324558	9240		1.61698e+06	0.797043	0.202957
	4 cell(6, 1)	2092108	9240		1.38453e+06	0.682464	0.317536
	4 cell(7, 1)	1902955	9310		1.19001e+06	0.586584	0.413416
	4 cell(8, 1)	1381422	9240		673842	0.332151	0.667849
	4 cell(9, 1)	1183073	9310		470133	0.231739	0.768261
	4 cell(10, 1)	946300	9240		238720	0.11767	0.88233
10 bp	5 cell(1, 1)	2929877	17556		1.58548e+06	0.956519	0.0434811
	5 cell(2, 1)	2915997	17424		1.5817e+06	0.954243	0.0457566
	5 cell(3, 1)	2808589	17556		1.46419e+06	0.883346	0.116654
	5 cell(4, 1)	2832257	17424		1.49796e+06	0.903723	0.096277
	5 cell(5, 1)	2831906	17556		1.4875e+06	0.897413	0.102587
	5 cell(6, 1)	2761466	17556		1.41706e+06	0.854916	0.145084
	5 cell(7, 1)	2681540	17424		1.34725e+06	0.812795	0.187205
	5 cell(8, 1)	2858850	17556		1.51445e+06	0.913668	0.0863318
	5 cell(9, 1)	2939675	17424		1.60538e+06	0.968528	0.0314716
	5 cell(10, 1)	3001949	17556		1.65755e+06	1	0
Background	6	1031351	13468		0
