# Supplementary material for: A novel single alpha-helix DNA-binding domain in CAF-1 promotes gene silencing and DNA damage survival through tetrasome-length DNA selectivity and spacer function
Source: eLife journal article supplement (doi:10.7554/elife.83538), 2023-06-14
Supplement: fig5-figsupp1-data1 [file 211222 Cy5 ladder EMSA with yCAF1 plusNHalf_Table.xlsx]

## Sheet: 211222 Cy5 ladder EMSA with yCA
	Name	Volume	Background	Background Level	Background Type	Median Intensity	Average Intensity	Mode Intensity	Std Dev	Variance	Min Intensity	Max Intensity	Percent	Area > Background	Centre X	Centre Y	Width	Height	Area	Comment
	1 cell(1, 1)	3718737	0	0	None	286	328.34	99	212.31	45073.6	985	65	4.7	11326	514	1279	134	89	11326
	1 cell(2, 1)	1409102	0	0	None	108	122.96	88	40.37	1629.53	253	58	1.78	11460	648	1283	135	89	11460
	1 cell(3, 1)	1141788	0	0	None	95	99.17	87	20.75	430.68	171	52	1.44	11513	782	1287	135	91	11513
	1 cell(4, 1)	1048854	0	0	None	89	89.73	89	12.1	146.42	144	50	1.32	11689	917	1291	136	91	11689
	1 cell(5, 1)	1048154	0	0	None	87	88.65	86	13.31	177.11	141	49	1.32	11824	1051	1295	136	93	11824
	1 cell(6, 1)	1051258	0	0	None	87	88.76	78	14.06	197.76	148	51	1.33	11844	1185	1299	135	93	11844
	1 cell(7, 1)	1102027	0	0	None	89	92.17	82	17.45	304.42	143	51	1.39	11956	1320	1303	136	93	11956
	1 cell(8, 1)	1096071	0	0	None	89	90.96	84	14.46	209.14	149	48	1.38	12050	1454	1307	136	95	12050
	1 cell(9, 1)	1052392	0	0	None	85	85.59	84	12.01	144.33	135	45	1.33	12296	1588	1312	137	96	12296
	1 cell(10, 1)	1041704	0	0	None	84	84.1	85	10.54	110.99	121	46	1.32	12386	1722	1315	137	97	12386
	2 cell(1, 1)	2139831	0	0	None	321	354.63	175	175.67	30860.8	792	67	2.7	6034	514	1346	134	50	6034
	2 cell(2, 1)	1143689	0	0	None	181	189.6	146	65.61	4304.94	351	69	1.44	6032	648	1350	134	49	6032
	2 cell(3, 1)	878229	0	0	None	137	146.64	121	44.33	1965.22	266	68	1.11	5989	781	1355	133	50	5989
	2 cell(4, 1)	654512	0	0	None	109	108.51	106	17.36	301.5	163	60	0.83	6032	915	1359	134	49	6032
	2 cell(5, 1)	611735	0	0	None	98	101.38	95	17.65	311.61	165	57	0.77	6034	1049	1364	134	50	6034
	2 cell(6, 1)	600986	0	0	None	96	99.63	87	17.73	314.51	157	65	0.76	6032	1183	1368	134	49	6032
	2 cell(7, 1)	590769	0	0	None	96	97.94	91	18.01	324.47	155	53	0.75	6032	1317	1372	134	49	6032
	2 cell(8, 1)	530506	0	0	None	88	88.58	89	10.76	115.78	127	55	0.67	5989	1450	1377	133	50	5989
	2 cell(9, 1)	480137	0	0	None	80	79.57	77	9.04	81.7	110	49	0.61	6034	1584	1382	134	50	6034
	2 cell(10, 1)	479212	0	0	None	79	79.44	80	9.28	86.17	114	47	0.61	6032	1718	1386	134	49	6032
	3 cell(1, 1)	1644510	0	0	None	224	251.65	183	108.74	11825.1	551	71	2.08	6535	515	1398	137	53	6535
	3 cell(2, 1)	1309437	0	0	None	181	193.53	141	74.23	5510.27	400	66	1.65	6766	649	1403	137	54	6766
	3 cell(3, 1)	1243871	0	0	None	163	181.45	134	71.69	5139.48	377	65	1.57	6855	783	1406	135	55	6855
	3 cell(4, 1)	1054236	0	0	None	139	150.2	117	47.17	2224.82	284	65	1.33	7019	917	1411	135	56	7019
	3 cell(5, 1)	967551	0	0	None	130	134.91	100	36.67	1345.02	244	66	1.22	7172	1052	1415	134	58	7172
	3 cell(6, 1)	885134	0	0	None	119	121.15	94	28.43	808.36	203	57	1.12	7306	1186	1419	134	59	7306
	3 cell(7, 1)	810584	0	0	None	108	107.96	112	21.77	473.74	172	54	1.02	7508	1320	1424	135	60	7508
	3 cell(8, 1)	706413	0	0	None	94	93.42	93	12.19	148.57	149	56	0.89	7562	1454	1427	135	61	7562
	3 cell(9, 1)	639925	0	0	None	83	82.51	85	9.78	95.61	117	48	0.81	7756	1588	1432	137	62	7756
	3 cell(10, 1)	639264	0	0	None	81	80.59	83	9.25	85.56	115	40	0.81	7932	1722	1436	137	64	7932
	4 cell(1, 1)	2776058	0	0	None	209	316.14	122	247.05	61031.8	1159	55	3.51	8781	522	1464	133	70	8781
	4 cell(2, 1)	2368996	0	0	None	205	269.79	110	178.04	31699.4	784	69	2.99	8781	655	1468	133	70	8781
	4 cell(3, 1)	2615227	0	0	None	206	297.83	98	222.84	49658.2	965	77	3.3	8781	788	1472	133	70	8781
	4 cell(4, 1)	2318673	0	0	None	192	264.06	101	182.49	33303.7	749	67	2.93	8781	921	1476	133	70	8781
	4 cell(5, 1)	2221282	0	0	None	187	252.96	102	166.04	27568.8	724	74	2.8	8781	1054	1480	133	70	8781
	4 cell(6, 1)	2188533	0	0	None	165	251.21	99	182.22	33204.9	745	73	2.76	8712	1187	1483	132	69	8712
	4 cell(7, 1)	1762937	0	0	None	136	200.77	104	142.34	20261.6	660	58	2.23	8781	1319	1487	133	70	8781
	4 cell(8, 1)	1511464	0	0	None	127	172.13	90	98.11	9626.46	443	59	1.91	8781	1452	1491	133	70	8781
	4 cell(9, 1)	1237393	0	0	None	110	140.92	99	71.4	5098.39	372	54	1.56	8781	1585	1495	133	70	8781
	4 cell(10, 1)	1071144	0	0	None	102	121.98	86	52.52	2758.32	315	52	1.35	8781	1718	1499	133	70	8781
	5 cell(1, 1)	2950948	0	0	None	135	219.17	91	192.76	37156.4	1007	51	3.73	13464	525	1565	132	104	13464
	5 cell(2, 1)	2573850	0	0	None	132	191.17	84	135.86	18457.5	633	56	3.25	13464	657	1567	132	105	13464
	5 cell(3, 1)	2896628	0	0	None	132	215.14	87	179.56	32242.5	818	53	3.66	13464	789	1570	132	104	13464
	5 cell(4, 1)	2600960	0	0	None	126	193.18	86	144.88	20989.5	672	44	3.28	13464	921	1572	132	105	13464
	5 cell(5, 1)	2602614	0	0	None	128	193.3	83	147.14	21650.5	680	55	3.29	13464	1053	1575	132	104	13464
	5 cell(6, 1)	2807557	0	0	None	129	208.52	81	172.92	29901.6	782	53	3.55	13464	1185	1577	132	104	13464
	5 cell(7, 1)	2407601	0	0	None	115	178.82	83	144.37	20841.3	747	50	3.04	13464	1317	1579	132	105	13464
	5 cell(8, 1)	2451047	0	0	None	119	182.04	79	132.46	17546.7	621	44	3.1	13464	1449	1582	132	104	13464
	5 cell(9, 1)	2777729	0	0	None	126	206.31	80	180.35	32525.7	854	45	3.51	13464	1581	1584	132	105	13464
	5 cell(10, 1)	2474516	0	0	None	107	183.79	77	161.75	26164.6	824	43	3.12	13464	1713	1587	132	104	13464
	6	855976	0	0	None	72	72.12	70	8.52	72.51	108	42	1.08	11868	513	1052	138	86	11868

## Sheet: App Fraction Bound
		Volume	Area		Minus Backg.	Normalization	Bound apparent
50bp	1 cell(1, 1)	3718737	11326		2.90185e+06	1	0
	1 cell(2, 1)	1409102	11460		582553	0.200752	0.799248
	1 cell(3, 1)	1141788	11513		311416	0.107316	0.892684
	1 cell(4, 1)	1048854	11689		205788	0.0709162	0.929084
	1 cell(5, 1)	1048154	11824		195351	0.0673196	0.93268
	1 cell(6, 1)	1051258	11844		197013	0.0678921	0.932108
	1 cell(7, 1)	1102027	11956		239704	0.0826038	0.917396
	1 cell(8, 1)	1096071	12050		226968	0.078215	0.921785
	1 cell(9, 1)	1052392	12296		165547	0.0570486	0.942951
	1 cell(10, 1)	1041704	12386		148367	0.0511285	0.948871
40bp	2 cell(1, 1)	2139831	6034		1.70463e+06	1	0
	2 cell(2, 1)	1143689	6032		708633	0.41571	0.58429
	2 cell(3, 1)	878229	5989		446274	0.261801	0.738199
	2 cell(4, 1)	654512	6032		219456	0.128741	0.871259
	2 cell(5, 1)	611735	6034		176535	0.103562	0.896438
	2 cell(6, 1)	600986	6032		165930	0.0973406	0.902659
	2 cell(7, 1)	590769	6032		155713	0.0913469	0.908653
	2 cell(8, 1)	530506	5989		98551.1	0.0578138	0.942186
	2 cell(9, 1)	480137	6034		44936.5	0.0263614	0.973639
	2 cell(10, 1)	479212	6032		44155.8	0.0259034	0.974097
30 bp	3 cell(1, 1)	1644510	6535		1.17318e+06	1	0
	3 cell(2, 1)	1309437	6766		821441	0.700186	0.299814
	3 cell(3, 1)	1243871	6855		749456	0.638827	0.361173
	3 cell(4, 1)	1054236	7019		547993	0.467102	0.532898
	3 cell(5, 1)	967551	7172		450273	0.383807	0.616193
	3 cell(6, 1)	885134	7306		358191	0.305318	0.694682
	3 cell(7, 1)	810584	7508		269072	0.229353	0.770647
	3 cell(8, 1)	706413	7562		161006	0.13724	0.86276
	3 cell(9, 1)	639925	7756		80525.8	0.0686392	0.931361
	3 cell(10, 1)	639264	7932		67170.8	0.0572556	0.942744
20 bp	4 cell(1, 1)	2776058	8781		2.14273e+06	1	0
	4 cell(2, 1)	2368996	8781		1.73567e+06	0.810027	0.189973
	4 cell(3, 1)	2615227	8781		1.9819e+06	0.924941	0.0750589
	4 cell(4, 1)	2318673	8781		1.68535e+06	0.786541	0.213459
	4 cell(5, 1)	2221282	8781		1.58795e+06	0.741089	0.258911
	4 cell(6, 1)	2188533	8712		1.56018e+06	0.728128	0.271872
	4 cell(7, 1)	1762937	8781		1.12961e+06	0.527182	0.472818
	4 cell(8, 1)	1511464	8781		878137	0.409821	0.590179
	4 cell(9, 1)	1237393	8781		604066	0.281914	0.718086
	4 cell(10, 1)	1071144	8781		437817	0.204327	0.795673
10 bp	5 cell(1, 1)	2950948	13464		1.97986e+06	1	0
	5 cell(2, 1)	2573850	13464		1.60276e+06	0.809533	0.190467
	5 cell(3, 1)	2896628	13464		1.92554e+06	0.972564	0.0274363
	5 cell(4, 1)	2600960	13464		1.62987e+06	0.823226	0.176774
	5 cell(5, 1)	2602614	13464		1.63153e+06	0.824061	0.175939
	5 cell(6, 1)	2807557	13464		1.83647e+06	0.927575	0.0724248
	5 cell(7, 1)	2407601	13464		1.43651e+06	0.725563	0.274437
	5 cell(8, 1)	2451047	13464		1.47996e+06	0.747507	0.252493
	5 cell(9, 1)	2777729	13464		1.80664e+06	0.91251	0.0874905
	5 cell(10, 1)	2474516	13464		1.50343e+06	0.759361	0.240639
Backg	6	855976	11868		0
