# Supplementary material for: A novel single alpha-helix DNA-binding domain in CAF-1 promotes gene silencing and DNA damage survival through tetrasome-length DNA selectivity and spacer function
Source: eLife journal article supplement (doi:10.7554/elife.83538), 2023-06-14
Supplement: fig5-figsupp1-data1 [file 220121 Cy5 ladder EMSA with yCAF1 plusNHalf_n1_Table.xlsx]

## Sheet: 220121 Cy5 ladder EMSA with yCA
	Name	Volume	Background	Background Level	Background Type	Median Intensity	Average Intensity	Mode Intensity	Std Dev	Variance	Min Intensity	Max Intensity	Percent	Area > Background	Centre X	Centre Y	Width	Height	Area	Comment
	1 cell(1, 1)	2595984	0	0	None	366	390.37	80	240.01	57603.3	1024	58	2.73	6650	503	1424	133	50	6650
	1 cell(2, 1)	2363758	0	0	None	336.5	358.15	86	213.3	45496.5	908	62	2.49	6600	636	1424	132	50	6600
	1 cell(3, 1)	1443432	0	0	None	181	217.06	89	114.82	13183.6	534	54	1.52	6650	768	1424	133	50	6650
	1 cell(4, 1)	854290	0	0	None	123	129.44	105	37.58	1412.27	240	49	0.9	6600	901	1424	132	50	6600
	1 cell(5, 1)	641943	0	0	None	97	96.53	98	15.06	226.79	144	53	0.68	6650	1033	1424	133	50	6650
	1 cell(6, 1)	594320	0	0	None	88	89.37	84	14.17	200.84	139	49	0.63	6650	1166	1424	133	50	6650
	1 cell(7, 1)	581038	0	0	None	87.5	88.04	84	13.07	170.94	140	51	0.61	6600	1299	1424	132	50	6600
	1 cell(8, 1)	561933	0	0	None	82	84.5	83	14.61	213.33	141	44	0.59	6650	1431	1424	133	50	6650
	1 cell(9, 1)	563022	0	0	None	83	85.31	75	15.41	237.54	136	41	0.59	6600	1564	1424	132	50	6600
	1 cell(10, 1)	496177	0	0	None	75	74.61	74	9.02	81.29	106	40	0.52	6650	1696	1424	133	50	6650
	2 cell(1, 1)	2792555	0	0	None	297	359.31	77	232.97	54273.3	1002	53	2.94	7772	490	1478	134	58	7772
	2 cell(2, 1)	2743595	0	0	None	307	355.66	90	197.11	38853.2	874	68	2.89	7714	623	1478	133	58	7714
	2 cell(3, 1)	2248987	0	0	None	252	289.37	90	169.91	28870.5	746	58	2.37	7772	757	1478	134	58	7772
	2 cell(4, 1)	1520048	0	0	None	176	197.05	157	82.32	6776.16	420	55	1.6	7714	890	1478	133	58	7714
	2 cell(5, 1)	860433	0	0	None	110	110.71	110	21.6	466.74	179	55	0.91	7772	1024	1478	134	58	7772
	2 cell(6, 1)	761927	0	0	None	96	98.03	94	17.25	297.65	157	50	0.8	7772	1158	1478	134	58	7772
	2 cell(7, 1)	747685	0	0	None	96	96.93	91	16.49	271.96	159	48	0.79	7714	1291	1478	133	58	7714
	2 cell(8, 1)	686598	0	0	None	86	88.34	82	13.79	190.21	141	45	0.72	7772	1425	1478	134	58	7772
	2 cell(9, 1)	669128	0	0	None	86	86.74	83	14.76	217.72	132	44	0.7	7714	1558	1478	133	58	7714
	2 cell(10, 1)	576005	0	0	None	74	74.11	74	8.74	76.41	103	36	0.61	7772	1692	1478	134	58	7772
	3 cell(1, 1)	2068901	0	0	None	202	235.69	153	123.6	15276.3	611	59	2.18	8778	501	1540	133	66	8778
	3 cell(2, 1)	2040533	0	0	None	201	234.22	162	116.29	13523.5	566	69	2.15	8712	634	1540	132	66	8712
	3 cell(3, 1)	2070064	0	0	None	201	235.82	158	118.09	13946	563	63	2.18	8778	766	1540	133	66	8778
	3 cell(4, 1)	1788657	0	0	None	176	205.31	149	93.5	8743.14	459	64	1.88	8712	899	1540	132	66	8712
	3 cell(5, 1)	1329601	0	0	None	135	151.47	109	55.48	3078.52	314	58	1.4	8778	1031	1540	133	66	8778
	3 cell(6, 1)	1058900	0	0	None	114	120.63	92	33.43	1117.67	228	55	1.11	8778	1164	1540	133	66	8778
	3 cell(7, 1)	1033913	0	0	None	112	118.68	96	34.13	1165.06	221	47	1.09	8712	1297	1540	132	66	8712
	3 cell(8, 1)	821473	0	0	None	94	93.58	98	11.62	134.98	134	59	0.86	8778	1429	1540	133	66	8778
	3 cell(9, 1)	806469	0	0	None	94	92.57	99	16.44	270.37	142	49	0.85	8712	1562	1540	132	66	8712
	3 cell(10, 1)	672228	0	0	None	77	76.58	79	9.44	89.15	111	39	0.71	8778	1694	1540	133	66	8778
	4 cell(1, 1)	3121956	0	0	None	141	246.37	94	225.6	50896.7	1125	53	3.28	12672	493	1621	132	96	12672
	4 cell(2, 1)	3248493	0	0	None	167	256.35	103	203.47	41401.6	996	61	3.42	12672	625	1621	132	96	12672
	4 cell(3, 1)	3186322	0	0	None	154	251.45	98	212.4	45114.4	976	65	3.35	12672	757	1621	132	96	12672
	4 cell(4, 1)	3144859	0	0	None	173	248.17	95	184.57	34065.6	800	64	3.31	12672	889	1621	132	96	12672
	4 cell(5, 1)	3024060	0	0	None	160	238.64	100	182.96	33475	836	63	3.18	12672	1021	1621	132	96	12672
	4 cell(6, 1)	2779882	0	0	None	144	219.37	97	176.34	31094.7	795	61	2.92	12672	1153	1621	132	96	12672
	4 cell(7, 1)	2626366	0	0	None	136	207.26	94	162.96	26554.9	734	57	2.76	12672	1285	1621	132	96	12672
	4 cell(8, 1)	1904847	0	0	None	106	150.32	93	96.53	9317.8	523	53	2	12672	1417	1621	132	96	12672
	4 cell(9, 1)	1886530	0	0	None	112	148.87	108	100.07	10014.6	535	55	1.98	12672	1549	1621	132	96	12672
	4 cell(10, 1)	1300689	0	0	None	90	102.64	86	37.46	1403.16	267	49	1.37	12672	1681	1621	132	96	12672
	5 cell(1, 1)	3236265	0	0	None	139.5	202.32	117	148.12	21940.1	811	59	3.4	15996	521	1735	129	124	15996
	5 cell(2, 1)	3313697	0	0	None	143	207.16	110	147.15	21653.4	774	60	3.49	15996	650	1735	129	124	15996
	5 cell(3, 1)	3213454	0	0	None	135	200.89	98	150.41	22622	755	49	3.38	15996	779	1735	129	124	15996
	5 cell(4, 1)	2878854	0	0	None	123	179.97	91	129.11	16669.8	621	52	3.03	15996	908	1735	129	124	15996
	5 cell(5, 1)	2955473	0	0	None	124	184.76	91	136.33	18585.9	663	53	3.11	15996	1037	1735	129	124	15996
	5 cell(6, 1)	2879596	0	0	None	117	180.02	87	139.19	19373.2	697	53	3.03	15996	1166	1735	129	124	15996
	5 cell(7, 1)	2740520	0	0	None	113	171.33	90	127.54	16266.8	652	50	2.88	15996	1295	1735	129	124	15996
	5 cell(8, 1)	2673588	0	0	None	112	167.14	82	116.12	13483.8	555	53	2.81	15996	1424	1735	129	124	15996
	5 cell(9, 1)	2920364	0	0	None	122	182.57	89	154.82	23968.8	825	49	3.07	15996	1553	1735	129	124	15996
	5 cell(10, 1)	2889683	0	0	None	110	180.65	81	166.64	27767.5	907	38	3.04	15996	1682	1735	129	124	15996
	6	1154159	0	0	None	69	69.34	70	8.43	71.01	99	38	1.21	16644	490	1104	146	114	16644

## Sheet: App Fract Bound
		Volume	Area		Minus Backg.	Normalization	Bound apparent
50bp	1 cell(1, 1)	2595984	6650		2.13485e+06	1	0
	1 cell(2, 1)	2363758	6600		1.90609e+06	0.892845	0.107155
	1 cell(3, 1)	1443432	6650		982295	0.460124	0.539876
	1 cell(4, 1)	854290	6600		396621	0.185784	0.814216
	1 cell(5, 1)	641943	6650		180806	0.0846929	0.915307
	1 cell(6, 1)	594320	6650		133183	0.0623854	0.937615
	1 cell(7, 1)	581038	6600		123369	0.057788	0.942212
	1 cell(8, 1)	561933	6650		100796	0.0472148	0.952785
	1 cell(9, 1)	563022	6600		105353	0.049349	0.950651
	1 cell(10, 1)	496177	6650		35040.4	0.0164135	0.983586
40bp	2 cell(1, 1)	2792555	7772		2.25361e+06	1	0
	2 cell(2, 1)	2743595	7714		2.20868e+06	0.98006	0.0199404
	2 cell(3, 1)	2248987	7772		1.71005e+06	0.758802	0.241198
	2 cell(4, 1)	1520048	7714		985130	0.437133	0.562867
	2 cell(5, 1)	860433	7772		321493	0.142656	0.857344
	2 cell(6, 1)	761927	7772		222987	0.0989462	0.901054
	2 cell(7, 1)	747685	7714		212767	0.0944112	0.905589
	2 cell(8, 1)	686598	7772		147658	0.0655203	0.93448
	2 cell(9, 1)	669128	7714		134210	0.059553	0.940447
	2 cell(10, 1)	576005	7772		37064.6	0.0164467	0.983553
30 bp	3 cell(1, 1)	2068901	8778		1.4602e+06	0.999204	0.000795832
	3 cell(2, 1)	2040533	8712		1.43641e+06	0.982924	0.017076
	3 cell(3, 1)	2070064	8778		1.46136e+06	1	0
	3 cell(4, 1)	1788657	8712		1.18453e+06	0.810567	0.189433
	3 cell(5, 1)	1329601	8778		720901	0.493307	0.506693
	3 cell(6, 1)	1058900	8778		450200	0.308068	0.691932
	3 cell(7, 1)	1033913	8712		429789	0.294102	0.705898
	3 cell(8, 1)	821473	8778		212773	0.145599	0.854401
	3 cell(9, 1)	806469	8712		202345	0.138463	0.861537
	3 cell(10, 1)	672228	8778		63527.7	0.0434715	0.956528
20 bp	4 cell(1, 1)	3121956	12672		2.24323e+06	0.946604	0.0533964
	4 cell(2, 1)	3248493	12672		2.36977e+06	1	0
	4 cell(3, 1)	3186322	12672		2.3076e+06	0.973765	0.0262351
	4 cell(4, 1)	3144859	12672		2.26613e+06	0.956268	0.0437317
	4 cell(5, 1)	3024060	12672		2.14533e+06	0.905293	0.0947067
	4 cell(6, 1)	2779882	12672		1.90116e+06	0.802254	0.197746
	4 cell(7, 1)	2626366	12672		1.74764e+06	0.737473	0.262527
	4 cell(8, 1)	1904847	12672		1.02612e+06	0.433005	0.566995
	4 cell(9, 1)	1886530	12672		1.0078e+06	0.425276	0.574724
	4 cell(10, 1)	1300689	12672		421964	0.178061	0.821939
10 bp	5 cell(1, 1)	3236265	15996		2.12704e+06	0.964875	0.035125
	5 cell(2, 1)	3313697	15996		2.20447e+06	1	0
	5 cell(3, 1)	3213454	15996		2.10423e+06	0.954527	0.0454725
	5 cell(4, 1)	2878854	15996		1.76963e+06	0.802745	0.197255
	5 cell(5, 1)	2955473	15996		1.84625e+06	0.837501	0.162499
	5 cell(6, 1)	2879596	15996		1.77037e+06	0.803082	0.196918
	5 cell(7, 1)	2740520	15996		1.6313e+06	0.739994	0.260006
	5 cell(8, 1)	2673588	15996		1.56436e+06	0.709632	0.290368
	5 cell(9, 1)	2920364	15996		1.81114e+06	0.821575	0.178425
	5 cell(10, 1)	2889683	15996		1.78046e+06	0.807657	0.192343
Background	6	1154159	16644		0
