# Supplementary material for: A novel single alpha-helix DNA-binding domain in CAF-1 promotes gene silencing and DNA damage survival through tetrasome-length DNA selectivity and spacer function
Source: eLife journal article supplement (doi:10.7554/elife.83538), 2023-06-14
Supplement: fig5-figsupp1-data1 [file 220121 Cy5 ladder EMSA with yCAF1 plusNHalf_n2_Table.xlsx]

## Sheet: 220121 Cy5 ladder EMSA with yCA
	Name	Volume	Background	Background Level	Background Type	Median Intensity	Average Intensity	Mode Intensity	Std Dev	Variance	Min Intensity	Max Intensity	Percent	Area > Background	Centre X	Centre Y	Width	Height	Area	Comment
	1 cell(1, 1)	2459879	0	0	None	350	361.11	105	204.1	41656.8	888	64	2.61	6812	562	1461	131	52	6812
	1 cell(2, 1)	2285196	0	0	None	316	335.47	101	194.54	37845.6	862	64	2.43	6812	693	1461	131	52	6812
	1 cell(3, 1)	1627007	0	0	None	225	237.03	105	109.59	12009.4	505	63	1.73	6864	825	1461	132	52	6864
	1 cell(4, 1)	846648	0	0	None	127	124.29	137	27.02	729.82	211	47	0.9	6812	956	1461	131	52	6812
	1 cell(5, 1)	651005	0	0	None	96	95.57	99	12.98	168.48	147	49	0.69	6812	1087	1461	131	52	6812
	1 cell(6, 1)	593847	0	0	None	87	87.18	89	10.22	104.52	127	56	0.63	6812	1218	1461	131	52	6812
	1 cell(7, 1)	580361	0	0	None	84	85.2	78	11.43	130.7	132	40	0.62	6812	1349	1461	131	52	6812
	1 cell(8, 1)	583102	0	0	None	82	84.95	80	15.28	233.47	137	45	0.62	6864	1481	1461	132	52	6864
	1 cell(9, 1)	593409	0	0	None	86	87.11	81	14	196.12	127	46	0.63	6812	1612	1461	131	52	6812
	1 cell(10, 1)	539068	0	0	None	79	79.14	79	9.62	92.6	110	37	0.57	6812	1743	1461	131	52	6812
	2 cell(1, 1)	2887462	0	0	None	271	339.22	245	199.99	39996.6	901	60	3.07	8512	562	1520	133	64	8512
	2 cell(2, 1)	2708426	0	0	None	257	320.6	99	192.86	37195	861	67	2.88	8448	695	1520	132	64	8448
	2 cell(3, 1)	2346885	0	0	None	230	275.71	139	154.99	24023.3	660	63	2.49	8512	827	1520	133	64	8512
	2 cell(4, 1)	1494988	0	0	None	161	176.96	129	69.93	4889.89	348	60	1.59	8448	960	1520	132	64	8448
	2 cell(5, 1)	947967	0	0	None	110	111.37	99	20.96	439.3	174	61	1.01	8512	1092	1520	133	64	8512
	2 cell(6, 1)	811633	0	0	None	94	95.35	88	15.03	225.86	157	53	0.86	8512	1225	1520	133	64	8512
	2 cell(7, 1)	766530	0	0	None	89	90.74	84	16	255.91	153	46	0.81	8448	1358	1520	132	64	8448
	2 cell(8, 1)	770045	0	0	None	87	90.47	83	17.17	294.71	143	48	0.82	8512	1490	1520	133	64	8512
	2 cell(9, 1)	732959	0	0	None	86	86.76	84	12.77	163.14	130	48	0.78	8448	1623	1520	132	64	8448
	2 cell(10, 1)	663011	0	0	None	78	77.89	78	9.17	84.07	113	48	0.7	8512	1755	1520	133	64	8512
	3 cell(1, 1)	2066874	0	0	None	186	223.69	163	117.03	13695.7	575	57	2.2	9240	556	1587	132	70	9240
	3 cell(2, 1)	2007494	0	0	None	176	215.63	140	107.18	11488.1	555	69	2.13	9310	688	1587	133	70	9310
	3 cell(3, 1)	1968416	0	0	None	178	213.03	151	102.88	10584.1	507	64	2.09	9240	821	1587	132	70	9240
	3 cell(4, 1)	1766100	0	0	None	164	189.7	95	87.63	7678.68	463	69	1.88	9310	953	1587	133	70	9310
	3 cell(5, 1)	1419046	0	0	None	136	153.58	120	59.36	3523.15	323	59	1.51	9240	1086	1587	132	70	9240
	3 cell(6, 1)	1157234	0	0	None	118	125.24	91	35.82	1283.15	231	54	1.23	9240	1218	1587	132	70	9240
	3 cell(7, 1)	997271	0	0	None	103	107.12	86	24.8	615.16	181	56	1.06	9310	1350	1587	133	70	9310
	3 cell(8, 1)	904015	0	0	None	96	97.84	90	18	323.83	152	51	0.96	9240	1483	1587	132	70	9240
	3 cell(9, 1)	818218	0	0	None	88	87.89	92	11.96	143.13	170	51	0.87	9310	1615	1587	133	70	9310
	3 cell(10, 1)	721127	0	0	None	78	78.04	81	8.99	80.8	112	50	0.77	9240	1748	1587	132	70	9240
	4 cell(1, 1)	3116076	0	0	None	157	253.05	98	212.57	45184	1003	61	3.31	12314	563	1673	131	94	12314
	4 cell(2, 1)	3085792	0	0	None	156	248.69	107	202.3	40925.2	998	64	3.28	12408	695	1673	132	94	12408
	4 cell(3, 1)	3099522	0	0	None	157	251.71	104	201.69	40677.4	915	67	3.29	12314	826	1673	131	94	12314
	4 cell(4, 1)	2954413	0	0	None	150	238.11	106	185.37	34362.5	807	59	3.14	12408	958	1673	132	94	12408
	4 cell(5, 1)	2828362	0	0	None	145	229.69	100	180.41	32549.6	782	62	3	12314	1089	1673	131	94	12314
	4 cell(6, 1)	2710391	0	0	None	135	220.11	91	178.8	31970.7	806	54	2.88	12314	1220	1673	131	94	12314
	4 cell(7, 1)	2413272	0	0	None	125	194.49	88	150.07	22521.8	665	58	2.56	12408	1352	1673	132	94	12408
	4 cell(8, 1)	2133427	0	0	None	115	173.25	91	127.97	16377	590	52	2.27	12314	1483	1673	131	94	12314
	4 cell(9, 1)	1732562	0	0	None	100	139.63	90	90	8100.43	455	49	1.84	12408	1615	1673	132	94	12408
	4 cell(10, 1)	1271010	0	0	None	90	103.22	84	39.12	1530.62	261	50	1.35	12314	1746	1673	131	94	12314
	5 cell(1, 1)	3101463	0	0	None	137	198.81	95	154	23717	797	54	3.29	15600	567	1794	130	120	15600
	5 cell(2, 1)	3097307	0	0	None	137	200.08	96	148.94	22182.3	784	58	3.29	15480	696	1794	129	120	15480
	5 cell(3, 1)	3084582	0	0	None	131	197.73	90	155.76	24261.3	807	47	3.28	15600	826	1794	130	120	15600
	5 cell(4, 1)	2937032	0	0	None	126	189.73	85	144.05	20749.1	685	49	3.12	15480	955	1794	129	120	15480
	5 cell(5, 1)	2876714	0	0	None	121	184.4	90	141.6	20050.1	680	52	3.06	15600	1085	1794	130	120	15600
	5 cell(6, 1)	2849854	0	0	None	118	182.68	84	147.07	21630	708	48	3.03	15600	1215	1794	130	120	15600
	5 cell(7, 1)	2735894	0	0	None	115	176.74	81	135.72	18421.2	654	50	2.91	15480	1344	1794	129	120	15480
	5 cell(8, 1)	2795692	0	0	None	114	179.21	81	143.87	20697.4	686	43	2.97	15600	1474	1794	130	120	15600
	5 cell(9, 1)	2866205	0	0	None	117	185.16	87	155.46	24167.5	797	51	3.04	15480	1603	1794	129	120	15480
	5 cell(10, 1)	2875065	0	0	None	115	184.3	87	160.13	25641.3	888	46	3.05	15600	1733	1794	130	120	15600
	7	878299	0	0	None	69	69.44	70	8.32	69.21	184	39	0.93	12648	560	1107	124	102	12648

## Sheet: App Fract bound
		Volume	Area		Minus Backg.	Normalization	Bound apparent
50bp	1 cell(1, 1)	2459879	6812		1.98684e+06	1	0
	1 cell(2, 1)	2285196	6812		1.81216e+06	0.91208	0.0879199
	1 cell(3, 1)	1627007	6864		1.15036e+06	0.578989	0.421011
	1 cell(4, 1)	846648	6812		373611	0.188043	0.811957
	1 cell(5, 1)	651005	6812		177968	0.0895733	0.910427
	1 cell(6, 1)	593847	6812		120810	0.060805	0.939195
	1 cell(7, 1)	580361	6812		107324	0.0540173	0.945983
	1 cell(8, 1)	583102	6864		106454	0.0535795	0.946421
	1 cell(9, 1)	593409	6812		120372	0.0605846	0.939415
	1 cell(10, 1)	539068	6812		66030.9	0.0332341	0.966766
40bp	2 cell(1, 1)	2887462	8512		2.29637e+06	1	0
	2 cell(2, 1)	2708426	8448		2.12178e+06	0.923971	0.0760293
	2 cell(3, 1)	2346885	8512		1.7558e+06	0.764595	0.235405
	2 cell(4, 1)	1494988	8448		908344	0.395556	0.604444
	2 cell(5, 1)	947967	8512		356879	0.15541	0.84459
	2 cell(6, 1)	811633	8512		220545	0.0960405	0.903959
	2 cell(7, 1)	766530	8448		179886	0.0783349	0.921665
	2 cell(8, 1)	770045	8512		178957	0.0779302	0.92207
	2 cell(9, 1)	732959	8448		146315	0.0637158	0.936284
	2 cell(10, 1)	663011	8512		71923	0.0313202	0.96868
30 bp	3 cell(1, 1)	2066874	9240		1.42523e+06	1	0
	3 cell(2, 1)	2007494	9310		1.36099e+06	0.954926	0.045074
	3 cell(3, 1)	1968416	9240		1.32677e+06	0.930918	0.0690821
	3 cell(4, 1)	1766100	9310		1.1196e+06	0.785554	0.214446
	3 cell(5, 1)	1419046	9240		777404	0.545458	0.454542
	3 cell(6, 1)	1157234	9240		515592	0.36176	0.63824
	3 cell(7, 1)	997271	9310		350768	0.246113	0.753887
	3 cell(8, 1)	904015	9240		262373	0.184092	0.815908
	3 cell(9, 1)	818218	9310		171715	0.120482	0.879518
	3 cell(10, 1)	721127	9240		79485.4	0.0557701	0.94423
20 bp	4 cell(1, 1)	3116076	12314		2.26097e+06	1	0
	4 cell(2, 1)	3085792	12408		2.22416e+06	0.983719	0.0162813
	4 cell(3, 1)	3099522	12314		2.24442e+06	0.992678	0.00732163
	4 cell(4, 1)	2954413	12408		2.09278e+06	0.925611	0.0743886
	4 cell(5, 1)	2828362	12314		1.97326e+06	0.872748	0.127252
	4 cell(6, 1)	2710391	12314		1.85529e+06	0.82057	0.17943
	4 cell(7, 1)	2413272	12408		1.55164e+06	0.686271	0.313729
	4 cell(8, 1)	2133427	12314		1.27832e+06	0.565386	0.434614
	4 cell(9, 1)	1732562	12408		870929	0.385201	0.614799
	4 cell(10, 1)	1271010	12314		415905	0.18395	0.81605
10 bp	5 cell(1, 1)	3101463	15600		2.01817e+06	0.997935	0.00206542
	5 cell(2, 1)	3097307	15480		2.02235e+06	1	0
	5 cell(3, 1)	3084582	15600		2.00129e+06	0.989587	0.0104126
	5 cell(4, 1)	2937032	15480		1.86207e+06	0.920748	0.0792519
	5 cell(5, 1)	2876714	15600		1.79342e+06	0.886802	0.113198
	5 cell(6, 1)	2849854	15600		1.76656e+06	0.87352	0.12648
	5 cell(7, 1)	2735894	15480		1.66094e+06	0.82129	0.17871
	5 cell(8, 1)	2795692	15600		1.7124e+06	0.846739	0.153261
	5 cell(9, 1)	2866205	15480		1.79125e+06	0.885726	0.114274
	5 cell(10, 1)	2875065	15600		1.79177e+06	0.885987	0.114013
Background	7	878299	12648		0
