# Supplementary material for: A novel single alpha-helix DNA-binding domain in CAF-1 promotes gene silencing and DNA damage survival through tetrasome-length DNA selectivity and spacer function
Source: eLife journal article supplement (doi:10.7554/elife.83538), 2023-06-14
Supplement: fig6-data1 [file 211227 Cy5 Ladder EMSA with yCAF1 yKER to hKER__Table.xlsx]

## Sheet: 211227 Cy5 Ladder EMSA with yCA
	Name	Volume	Background	Background Level	Background Type	Median Intensity	Average Intensity	Mode Intensity	Std Dev	Variance	Min Intensity	Max Intensity	Percent	Area > Background	Centre X	Centre Y	Width	Height	Area	Comment
	1 cell(1, 1)	2175871	0	0	None	402	416.35	98	253.46	64241.8	1025	65	2.56	5226	523	1414	134	39	5226
	1 cell(2, 1)	952691	0	0	None	173	182.3	123	72.82	5303.36	383	64	1.12	5226	657	1414	134	39	5226
	1 cell(3, 1)	775609	0	0	None	142	149.53	119	48.66	2368.21	290	60	0.91	5187	790	1414	133	39	5187
	1 cell(4, 1)	687519	0	0	None	129	131.56	114	31.88	1016.22	228	52	0.81	5226	924	1414	134	39	5226
	1 cell(5, 1)	574271	0	0	None	106	109.89	102	33.06	1093.26	940	57	0.67	5226	1058	1414	134	39	5226
	1 cell(6, 1)	594728	0	0	None	112	113.8	100	21.52	463.17	180	62	0.7	5226	1192	1414	134	39	5226
	1 cell(7, 1)	517122	0	0	None	98	98.95	97	15.43	238.04	149	57	0.61	5226	1326	1414	134	39	5226
	1 cell(8, 1)	483840	0	0	None	90	93.28	88	15.58	242.73	157	51	0.57	5187	1459	1414	133	39	5187
	1 cell(9, 1)	478753	0	0	None	91	91.61	92	12.84	164.99	140	58	0.56	5226	1593	1414	134	39	5226
	1 cell(10, 1)	481089	0	0	None	91	92.06	89	13.49	182.02	145	50	0.57	5226	1727	1414	134	39	5226
	2 cell(1, 1)	2311563	0	0	None	365	398	92	202.95	41187.6	889	68	2.72	5808	532	1459	132	44	5808
	2 cell(2, 1)	1661113	0	0	None	251.5	283.85	199	143.87	20699	664	69	1.95	5852	664	1459	133	44	5852
	2 cell(3, 1)	1444740	0	0	None	224	248.75	177	113.85	12961.7	531	63	1.7	5808	797	1459	132	44	5808
	2 cell(4, 1)	1117453	0	0	None	185	190.95	91	71.48	5108.88	353	62	1.31	5852	929	1459	133	44	5852
	2 cell(5, 1)	797785	0	0	None	139	137.36	150	34.15	1166.41	233	64	0.94	5808	1062	1459	132	44	5808
	2 cell(6, 1)	852728	0	0	None	146	146.82	136	38.36	1471.86	230	63	1	5808	1194	1459	132	44	5808
	2 cell(7, 1)	639110	0	0	None	109	109.21	108	18.35	336.71	161	54	0.75	5852	1326	1459	133	44	5852
	2 cell(8, 1)	561778	0	0	None	94	96.72	87	15.74	247.67	150	53	0.66	5808	1459	1459	132	44	5808
	2 cell(9, 1)	544253	0	0	None	93	93	96	12.48	155.71	141	52	0.64	5852	1591	1459	133	44	5852
	2 cell(10, 1)	542084	0	0	None	93	93.33	94	12.61	158.98	130	54	0.64	5808	1724	1459	132	44	5808
	3 cell(1, 1)	1906601	0	0	None	192	218.85	157	94.63	8954.43	484	56	2.24	8712	526	1514	132	66	8712
	3 cell(2, 1)	1787122	0	0	None	180	205.13	143	89.52	8013.6	464	51	2.1	8712	658	1514	132	66	8712
	3 cell(3, 1)	1752473	0	0	None	177	199.64	139	83.54	6978.75	473	64	2.06	8778	790	1514	133	66	8778
	3 cell(4, 1)	1687115	0	0	None	171	193.65	142	78.3	6130.8	408	68	1.98	8712	923	1514	132	66	8712
	3 cell(5, 1)	1458499	0	0	None	150.5	167.41	124	58.85	3463.11	344	66	1.71	8712	1055	1514	132	66	8712
	3 cell(6, 1)	1514017	0	0	None	155	173.79	128	66.64	4441.51	351	60	1.78	8712	1187	1514	132	66	8712
	3 cell(7, 1)	1224879	0	0	None	129.5	140.6	111	44.85	2011.21	274	54	1.44	8712	1319	1514	132	66	8712
	3 cell(8, 1)	1009909	0	0	None	111	115.05	95	26.49	701.67	192	53	1.19	8778	1451	1514	133	66	8778
	3 cell(9, 1)	884735	0	0	None	100	101.55	102	18.24	332.81	165	46	1.04	8712	1584	1514	132	66	8712
	3 cell(10, 1)	875401	0	0	None	100	100.48	94	16.58	274.98	160	55	1.03	8712	1716	1514	132	66	8712
	4 cell(1, 1)	2953149	0	0	None	149	236.25	100	197.22	38895.6	992	62	3.47	12500	529	1598	134	94	12500
	4 cell(2, 1)	2837045	0	0	None	147	226.96	103	175.8	30904.5	871	68	3.33	12500	661	1598	134	94	12500
	4 cell(3, 1)	2835505	0	0	None	152	228.56	104	171.25	29325.6	807	64	3.33	12406	792	1598	133	94	12406
	4 cell(4, 1)	2830112	0	0	None	150	226.41	102	171.64	29460	817	70	3.32	12500	924	1598	134	94	12500
	4 cell(5, 1)	2668083	0	0	None	145	213.45	95	153.04	23422.7	708	62	3.13	12500	1056	1598	134	94	12500
	4 cell(6, 1)	2742850	0	0	None	145	219.43	102	165.06	27245.3	758	63	3.22	12500	1188	1598	134	94	12500
	4 cell(7, 1)	2369359	0	0	None	128	189.55	90	137.05	18783.2	622	62	2.78	12500	1320	1598	134	94	12500
	4 cell(8, 1)	1972129	0	0	None	113	158.97	90	103.54	10721.5	516	59	2.32	12406	1451	1598	133	94	12406
	4 cell(9, 1)	1694322	0	0	None	103	135.55	97	77.61	6023.37	430	52	1.99	12500	1583	1598	134	94	12500
	4 cell(10, 1)	1672867	0	0	None	104	133.83	91	71.85	5162.41	396	47	1.97	12500	1715	1598	134	94	12500
	5 cell(1, 1)	2969859	0	0	None	124	178.56	96	130.6	17056	739	46	3.49	16632	530	1710	132	126	16632
	5 cell(2, 1)	2894084	0	0	None	124	174.01	102	111.64	12463.7	612	57	3.4	16632	662	1710	132	126	16632
	5 cell(3, 1)	2798824	0	0	None	120	169.56	94	108.7	11815.5	564	57	3.29	16506	793	1710	131	126	16506
	5 cell(4, 1)	2820762	0	0	None	119	169.6	92	117.22	13740	594	54	3.31	16632	925	1710	132	126	16632
	5 cell(5, 1)	2688376	0	0	None	116	161.64	99	103.05	10619.5	540	46	3.16	16632	1057	1710	132	126	16632
	5 cell(6, 1)	2730594	0	0	None	113	164.18	89	114.85	13189.5	580	53	3.21	16632	1189	1710	132	126	16632
	5 cell(7, 1)	2568087	0	0	None	108	154.41	92	103.86	10787.1	516	46	3.02	16632	1321	1710	132	126	16632
	5 cell(8, 1)	2570604	0	0	None	106	155.74	82	107.43	11541.2	531	53	3.02	16506	1452	1710	131	126	16506
	5 cell(9, 1)	2759044	0	0	None	110	165.89	95	122.69	15052.9	607	49	3.24	16632	1584	1710	132	126	16632
	5 cell(10, 1)	2650874	0	0	None	107	159.38	85	116.16	13493.5	633	51	3.11	16632	1716	1710	132	126	16632
	6	806431	0	0	None	78	78.02	79	8.61	74.1	111	48	0.95	10336	514	1207	136	76	10336

## Sheet: App Fraction Bound
		Volume	Area		Minus Backg.	Normalization	Bound apparent
50bp	1 cell(1, 1)	2175871	5226		1.76813e+06	1	0
	1 cell(2, 1)	952691	5226		544950	0.308207	0.691793
	1 cell(3, 1)	775609	5187		370911	0.209776	0.790224
	1 cell(4, 1)	687519	5226		279778	0.158234	0.841766
	1 cell(5, 1)	574271	5226		166530	0.0941844	0.905816
	1 cell(6, 1)	594728	5226		186987	0.105754	0.894246
	1 cell(7, 1)	517122	5226		109381	0.0618627	0.938137
	1 cell(8, 1)	483840	5187		79142.1	0.0447603	0.95524
	1 cell(9, 1)	478753	5226		71012.2	0.0401623	0.959838
	1 cell(10, 1)	481089	5226		73348.2	0.0414835	0.958516
40bp	2 cell(1, 1)	2311563	5808		1.85841e+06	1	0
	2 cell(2, 1)	1661113	5852		1.20453e+06	0.64815	0.35185
	2 cell(3, 1)	1444740	5808		991591	0.533568	0.466432
	2 cell(4, 1)	1117453	5852		660871	0.35561	0.64439
	2 cell(5, 1)	797785	5808		344636	0.185446	0.814554
	2 cell(6, 1)	852728	5808		399579	0.215011	0.784989
	2 cell(7, 1)	639110	5852		182528	0.098217	0.901783
	2 cell(8, 1)	561778	5808		108629	0.0584524	0.941548
	2 cell(9, 1)	544253	5852		87670.7	0.047175	0.952825
	2 cell(10, 1)	542084	5808		88934.7	0.0478552	0.952145
30 bp	3 cell(1, 1)	1906601	8712		1.22688e+06	1	0
	3 cell(2, 1)	1787122	8712		1.1074e+06	0.902615	0.0973847
	3 cell(3, 1)	1752473	8778		1.0676e+06	0.870177	0.129823
	3 cell(4, 1)	1687115	8712		1.00739e+06	0.821102	0.178898
	3 cell(5, 1)	1458499	8712		778775	0.634762	0.365238
	3 cell(6, 1)	1514017	8712		834293	0.680014	0.319986
	3 cell(7, 1)	1224879	8712		545155	0.444344	0.555656
	3 cell(8, 1)	1009909	8778		325036	0.264929	0.735071
	3 cell(9, 1)	884735	8712		205011	0.1671	0.8329
	3 cell(10, 1)	875401	8712		195677	0.159492	0.840508
20 bp	4 cell(1, 1)	2953149	12500		1.97788e+06	1	0
	4 cell(2, 1)	2837045	12500		1.86178e+06	0.941299	0.0587013
	4 cell(3, 1)	2835505	12406		1.86757e+06	0.944228	0.0557718
	4 cell(4, 1)	2830112	12500		1.85484e+06	0.937793	0.0622065
	4 cell(5, 1)	2668083	12500		1.69281e+06	0.855873	0.144127
	4 cell(6, 1)	2742850	12500		1.76758e+06	0.893675	0.106325
	4 cell(7, 1)	2369359	12500		1.39409e+06	0.70484	0.29516
	4 cell(8, 1)	1972129	12406		1.00419e+06	0.507712	0.492288
	4 cell(9, 1)	1694322	12500		719052	0.363547	0.636453
	4 cell(10, 1)	1672867	12500		697597	0.3527	0.6473
10 bp	5 cell(1, 1)	2969859	16632		1.6722e+06	1	0
	5 cell(2, 1)	2894084	16632		1.59643e+06	0.954686	0.0453144
	5 cell(3, 1)	2798824	16506		1.511e+06	0.903598	0.0964023
	5 cell(4, 1)	2820762	16632		1.52311e+06	0.910838	0.089162
	5 cell(5, 1)	2688376	16632		1.39072e+06	0.831669	0.168331
	5 cell(6, 1)	2730594	16632		1.43294e+06	0.856916	0.143084
	5 cell(7, 1)	2568087	16632		1.27043e+06	0.759735	0.240265
	5 cell(8, 1)	2570604	16506		1.28278e+06	0.767119	0.232881
	5 cell(9, 1)	2759044	16632		1.46139e+06	0.87393	0.12607
	5 cell(10, 1)	2650874	16632		1.35322e+06	0.809243	0.190757
Backg	6	806431	10336		0
