# Supplementary material for: A novel single alpha-helix DNA-binding domain in CAF-1 promotes gene silencing and DNA damage survival through tetrasome-length DNA selectivity and spacer function
Source: eLife journal article supplement (doi:10.7554/elife.83538), 2023-06-14
Supplement: fig6-data1 [file 220103 Cy5 ladder EMSA wiyh hKER_Table.xlsx]

## Sheet: 220103 Cy5 ladder EMSA wiyh hKE
	Name	Volume	Background	Background Level	Background Type	Median Intensity	Average Intensity	Mode Intensity	Std Dev	Variance	Min Intensity	Max Intensity	Percent	Area > Background	Centre X	Centre Y	Width	Height	Area	Comment
	1 cell(1, 1)	3081925	0	0	None	484	515.37	96	315.01	99229.5	1451	55	4.29	5980	473	1250	130	46	5980
	1 cell(2, 1)	1121407	0	0	None	185	186.09	241	67.1	4503	359	60	1.56	6026	603	1250	131	46	6026
	1 cell(3, 1)	701240	0	0	None	117	117.26	118	24.18	584.46	181	54	0.98	5980	734	1250	130	46	5980
	1 cell(4, 1)	625848	0	0	None	103	103.86	97	18.35	336.66	166	53	0.87	6026	864	1250	131	46	6026
	1 cell(5, 1)	600718	0	0	None	101	100.45	98	15.44	238.29	152	50	0.84	5980	995	1250	130	46	5980
	1 cell(6, 1)	595100	0	0	None	98	99.52	90	16.16	261.2	145	47	0.83	5980	1125	1250	130	46	5980
	1 cell(7, 1)	569884	0	0	None	93	94.57	89	14.55	211.67	139	58	0.79	6026	1255	1250	131	46	6026
	1 cell(8, 1)	560034	0	0	None	92	93.65	92	15.24	232.18	144	48	0.78	5980	1386	1249	130	47	5980
	1 cell(9, 1)	535247	0	0	None	88	88.82	88	12.97	168.24	132	53	0.75	6026	1516	1249	131	46	6026
	1 cell(10, 1)	522554	0	0	None	86	87.38	86	13.88	192.59	134	49	0.73	5980	1647	1248	130	47	5980
	2 cell(1, 1)	2127987	0	0	None	485	477.77	83	234.77	55119	1065	56	2.97	4454	472	1290	131	34	4454
	2 cell(2, 1)	1300280	0	0	None	307	291.94	348	112.59	12676.1	561	58	1.81	4454	603	1290	131	34	4454
	2 cell(3, 1)	582310	0	0	None	132	130.74	131	29.41	864.78	205	49	0.81	4454	734	1290	131	35	4454
	2 cell(4, 1)	488790	0	0	None	110	109.74	116	20.03	401.12	170	47	0.68	4454	865	1291	131	34	4454
	2 cell(5, 1)	460165	0	0	None	103	103.31	103	16.29	265.52	155	52	0.64	4454	996	1291	131	34	4454
	2 cell(6, 1)	445873	0	0	None	98	100.11	96	16.6	275.66	151	58	0.62	4454	1127	1291	131	34	4454
	2 cell(7, 1)	423825	0	0	None	93	95.16	90	14.58	212.58	143	58	0.59	4454	1258	1291	131	34	4454
	2 cell(8, 1)	415744	0	0	None	92	93.34	91	14.94	223.32	148	46	0.58	4454	1389	1291	131	35	4454
	2 cell(9, 1)	397992	0	0	None	88	89.36	87	13.69	187.53	138	55	0.55	4454	1520	1292	131	34	4454
	2 cell(10, 1)	386588	0	0	None	86	86.8	79	13.75	189.04	137	49	0.54	4454	1651	1292	131	34	4454
	3 cell(1, 1)	1750839	0	0	None	264.5	274.25	204	116.75	13631.6	596	69	2.44	6384	473	1333	133	48	6384
	3 cell(2, 1)	1541647	0	0	None	231	241.49	193	98.15	9632.82	510	63	2.15	6384	606	1333	133	48	6384
	3 cell(3, 1)	931679	0	0	None	143	144.85	130	39.17	1534.64	266	58	1.3	6432	740	1333	134	48	6432
	3 cell(4, 1)	769390	0	0	None	121	120.52	117	25.43	646.57	196	61	1.07	6384	873	1333	133	48	6384
	3 cell(5, 1)	703346	0	0	None	110	110.17	106	19.05	362.94	165	58	0.98	6384	1006	1333	133	48	6384
	3 cell(6, 1)	683317	0	0	None	104.5	107.04	96	19.42	377.3	177	61	0.95	6384	1139	1333	133	48	6384
	3 cell(7, 1)	633914	0	0	None	97	99.3	93	16.29	265.53	153	56	0.88	6384	1272	1333	133	48	6384
	3 cell(8, 1)	621659	0	0	None	94	96.65	92	16.83	283.23	150	55	0.87	6432	1406	1333	134	48	6432
	3 cell(9, 1)	597892	0	0	None	92	93.65	89	14.31	204.86	145	55	0.83	6384	1539	1333	133	48	6384
	3 cell(10, 1)	557561	0	0	None	86	87.34	81	15.13	228.92	141	48	0.78	6384	1672	1333	133	48	6384
	4 cell(1, 1)	3250988	0	0	None	211	319.23	132	256.2	65638.9	1165	62	4.53	10184	472	1393	134	76	10184
	4 cell(2, 1)	3166063	0	0	None	214	313.22	143	235.78	55590.4	1027	70	4.41	10108	605	1393	133	76	10108
	4 cell(3, 1)	2636349	0	0	None	184	258.87	131	183.8	33783.1	820	61	3.67	10184	739	1393	134	76	10184
	4 cell(4, 1)	2027905	0	0	None	149	200.62	120	125.11	15653.3	589	61	2.83	10108	872	1393	133	76	10108
	4 cell(5, 1)	1660288	0	0	None	134	163.03	119	79.87	6378.49	415	57	2.31	10184	1006	1393	134	76	10184
	4 cell(6, 1)	1495953	0	0	None	127	146.89	107	62.14	3860.96	366	60	2.08	10184	1140	1393	134	76	10184
	4 cell(7, 1)	1229663	0	0	None	114	121.65	95	34.38	1181.88	228	55	1.71	10108	1273	1393	133	76	10108
	4 cell(8, 1)	1116056	0	0	None	108	109.59	110	24.38	594.38	191	50	1.56	10184	1407	1393	134	76	10184
	4 cell(9, 1)	1072940	0	0	None	104	106.15	100	21.73	472.08	174	50	1.5	10108	1540	1393	133	76	10108
	4 cell(10, 1)	922254	0	0	None	90	90.56	85	16.62	276.32	160	43	1.29	10184	1674	1393	134	76	10184
	5 cell(1, 1)	3133719	0	0	None	138	251.1	87	258.38	66760.2	1309	52	4.37	12480	476	1483	130	96	12480
	5 cell(2, 1)	3061741	0	0	None	140	247.23	85	235.69	55548.5	1092	49	4.27	12384	605	1483	129	96	12384
	5 cell(3, 1)	2972380	0	0	None	138	238.17	92	221.66	49133.8	1019	55	4.14	12480	735	1483	130	96	12480
	5 cell(4, 1)	2825295	0	0	None	136	228.14	96	203.29	41327.8	899	50	3.94	12384	864	1483	129	96	12384
	5 cell(5, 1)	2810549	0	0	None	125	225.2	83	215.09	46263.8	936	49	3.92	12480	994	1483	130	96	12480
	5 cell(6, 1)	2769191	0	0	None	121	221.89	89	213.55	45601.6	947	53	3.86	12480	1124	1483	130	96	12480
	5 cell(7, 1)	2616320	0	0	None	114	211.27	82	203.78	41525.7	918	50	3.65	12384	1253	1483	129	96	12384
	5 cell(8, 1)	2640969	0	0	None	112	211.62	76	210.17	44171.1	1216	45	3.68	12480	1383	1483	130	96	12480
	5 cell(9, 1)	2637285	0	0	None	110	212.96	87	223.9	50130.8	1056	44	3.68	12384	1512	1483	129	96	12384
	5 cell(10, 1)	2411665	0	0	None	111	193.24	86	184.06	33877.9	886	42	3.36	12480	1642	1483	130	96	12480
	6	563977	0	0	None	73	72.57	75	8.59	73.77	105	41	0.79	7772	462	1006	134	58	7772

## Sheet: Apparent Fraction Bound
		Volume	Area		Minus Backg.	Normalization	Bound apparent
50bp	1 cell(1, 1)	3081925	5980		2.64798e+06	1	0
	1 cell(2, 1)	1121407	6026		684129	0.258358	0.741642
	1 cell(3, 1)	701240	5980		267300	0.100945	0.899055
	1 cell(4, 1)	625848	6026		188570	0.0712126	0.928787
	1 cell(5, 1)	600718	5980		166778	0.0629829	0.937017
	1 cell(6, 1)	595100	5980		161160	0.0608613	0.939139
	1 cell(7, 1)	569884	6026		132606	0.050078	0.949922
	1 cell(8, 1)	560034	5980		126094	0.0476188	0.952381
	1 cell(9, 1)	535247	6026		97968.9	0.0369975	0.963002
	1 cell(10, 1)	522554	5980		88613.9	0.0334647	0.966535
40bp	2 cell(1, 1)	2127987	4454		1.80478e+06	1	0
	2 cell(2, 1)	1300280	4454		977074	0.541381	0.458619
	2 cell(3, 1)	582310	4454		259104	0.143566	0.856434
	2 cell(4, 1)	488790	4454		165584	0.0917476	0.908252
	2 cell(5, 1)	460165	4454		136959	0.075887	0.924113
	2 cell(6, 1)	445873	4454		122667	0.067968	0.932032
	2 cell(7, 1)	423825	4454		100619	0.0557516	0.944248
	2 cell(8, 1)	415744	4454		92538.4	0.051274	0.948726
	2 cell(9, 1)	397992	4454		74786.4	0.041438	0.958562
	2 cell(10, 1)	386588	4454		63382.4	0.0351192	0.964881
30 bp	3 cell(1, 1)	1750839	6384		1.28758e+06	1	0
	3 cell(2, 1)	1541647	6384		1.07839e+06	0.837531	0.162469
	3 cell(3, 1)	931679	6432		464939	0.361095	0.638905
	3 cell(4, 1)	769390	6384		306134	0.237758	0.762242
	3 cell(5, 1)	703346	6384		240090	0.186465	0.813535
	3 cell(6, 1)	683317	6384		220061	0.17091	0.82909
	3 cell(7, 1)	633914	6384		170658	0.132541	0.867459
	3 cell(8, 1)	621659	6432		154919	0.120318	0.879682
	3 cell(9, 1)	597892	6384		134636	0.104565	0.895435
	3 cell(10, 1)	557561	6384		94304.5	0.0732416	0.926758
20 bp	4 cell(1, 1)	3250988	10184		2.51198e+06	1	0
	4 cell(2, 1)	3166063	10108		2.43257e+06	0.968388	0.0316125
	4 cell(3, 1)	2636349	10184		1.89734e+06	0.755317	0.244683
	4 cell(4, 1)	2027905	10108		1.29442e+06	0.515296	0.484704
	4 cell(5, 1)	1660288	10184		921284	0.366755	0.633245
	4 cell(6, 1)	1495953	10184		756949	0.301335	0.698665
	4 cell(7, 1)	1229663	10108		496174	0.197523	0.802477
	4 cell(8, 1)	1116056	10184		377052	0.150101	0.849899
	4 cell(9, 1)	1072940	10108		339451	0.135132	0.864868
	4 cell(10, 1)	922254	10184		183250	0.0729502	0.92705
10 bp	5 cell(1, 1)	3133719	12480		2.2281e+06	1	0
	5 cell(2, 1)	3061741	12384		2.16309e+06	0.970822	0.029178
	5 cell(3, 1)	2972380	12480		2.06677e+06	0.927589	0.0724109
	5 cell(4, 1)	2825295	12384		1.92665e+06	0.864702	0.135298
	5 cell(5, 1)	2810549	12480		1.90493e+06	0.854957	0.145043
	5 cell(6, 1)	2769191	12480		1.86358e+06	0.836395	0.163605
	5 cell(7, 1)	2616320	12384		1.71767e+06	0.770912	0.229088
	5 cell(8, 1)	2640969	12480		1.73535e+06	0.778848	0.221152
	5 cell(9, 1)	2637285	12384		1.73864e+06	0.780321	0.219679
	5 cell(10, 1)	2411665	12480		1.50605e+06	0.675934	0.324066
Backg	6	563977	7772		0
