# Supplementary material for: A novel single alpha-helix DNA-binding domain in CAF-1 promotes gene silencing and DNA damage survival through tetrasome-length DNA selectivity and spacer function
Source: eLife journal article supplement (doi:10.7554/elife.83538), 2023-06-14
Supplement: fig6-data1 [file 220120 Cy5 ladder EMSA with hKER_n1_Table.xlsx]

## Sheet: 220120 Cy5 ladder EMSA with hKE
	Name	Volume	Background	Background Level	Background Type	Median Intensity	Average Intensity	Mode Intensity	Std Dev	Variance	Min Intensity	Max Intensity	Percent	Area > Background	Centre X	Centre Y	Width	Height	Area	Comment
	1 cell(1, 1)	2223665	0	0	None	559	570.17	96	312.16	97446.8	1385	74	3.11	3900	593	1332	130	30	3900
	1 cell(2, 1)	1444722	0	0	None	368	367.61	85	190.36	36238.2	928	64	2.02	3930	723	1332	131	30	3930
	1 cell(3, 1)	528822	0	0	None	133	135.6	110	35.1	1232.19	239	62	0.74	3900	854	1332	130	30	3900
	1 cell(4, 1)	497782	0	0	None	125	126.66	124	30.51	931.07	207	59	0.7	3930	984	1332	131	30	3930
	1 cell(5, 1)	440019	0	0	None	114	112.83	116	19.68	387.39	171	59	0.61	3900	1115	1332	130	30	3900
	1 cell(6, 1)	402810	0	0	None	105	103.28	102	16.87	284.58	158	56	0.56	3900	1245	1332	130	30	3900
	1 cell(7, 1)	399844	0	0	None	103	101.74	102	15.58	242.88	143	51	0.56	3930	1375	1332	131	30	3930
	1 cell(8, 1)	372396	0	0	None	95	95.49	93	12.86	165.34	148	52	0.52	3900	1506	1332	130	30	3900
	1 cell(9, 1)	382985	0	0	None	97	97.45	87	15.95	254.27	146	50	0.53	3930	1636	1332	131	30	3930
	1 cell(10, 1)	366884	0	0	None	93	94.07	91	13.23	174.99	141	54	0.51	3900	1767	1332	130	30	3900
	2 cell(1, 1)	2373406	0	0	None	483.5	532.87	91	287.09	82422.7	1260	73	3.31	4454	592	1364	131	34	4454
	2 cell(2, 1)	1996173	0	0	None	427	448.18	87	243.6	59340.1	1025	69	2.79	4454	723	1364	131	34	4454
	2 cell(3, 1)	784753	0	0	None	175	177.55	143	56.84	3231.01	338	67	1.1	4420	854	1364	130	34	4420
	2 cell(4, 1)	633122	0	0	None	143	142.15	157	36.71	1347.95	235	62	0.88	4454	984	1364	131	34	4454
	2 cell(5, 1)	513192	0	0	None	117	115.22	114	20.81	432.87	163	58	0.72	4454	1115	1364	131	34	4454
	2 cell(6, 1)	465410	0	0	None	106	104.49	111	17.29	299.03	148	58	0.65	4454	1246	1364	131	34	4454
	2 cell(7, 1)	456382	0	0	None	104	102.47	105	15.57	242.51	145	52	0.64	4454	1377	1364	131	34	4454
	2 cell(8, 1)	427204	0	0	None	97	96.65	97	12.93	167.23	133	56	0.6	4420	1508	1364	130	34	4420
	2 cell(9, 1)	448447	0	0	None	101	100.68	97	16.77	281.12	147	46	0.63	4454	1638	1364	131	34	4454
	2 cell(10, 1)	420742	0	0	None	94	94.46	89	12.73	161.96	137	48	0.59	4454	1769	1364	131	34	4454
	3 cell(1, 1)	1648637	0	0	None	293	299.64	216	124.67	15541.8	618	57	2.3	5502	588	1402	131	42	5502
	3 cell(2, 1)	1630524	0	0	None	284	294.11	210	129.2	16693.4	627	74	2.28	5544	720	1402	132	42	5544
	3 cell(3, 1)	1289212	0	0	None	216	234.32	158	99.34	9867.54	517	67	1.8	5502	851	1402	131	42	5502
	3 cell(4, 1)	957909	0	0	None	164	172.78	146	59.22	3507.6	335	69	1.34	5544	983	1402	132	42	5544
	3 cell(5, 1)	705374	0	0	None	129	128.2	133	26.35	694.38	196	64	0.98	5502	1114	1402	131	42	5502
	3 cell(6, 1)	620922	0	0	None	114	112.85	115	19.47	379.06	166	62	0.87	5502	1245	1402	131	42	5502
	3 cell(7, 1)	604340	0	0	None	111	109.01	117	18.33	336.08	155	55	0.84	5544	1377	1402	132	42	5544
	3 cell(8, 1)	566970	0	0	None	103	103.05	106	14.95	223.59	149	49	0.79	5502	1508	1402	131	42	5502
	3 cell(9, 1)	578524	0	0	None	104	104.35	105	17.48	305.47	156	49	0.81	5544	1640	1402	132	42	5544
	3 cell(10, 1)	519145	0	0	None	95	94.36	92	12.3	151.41	140	49	0.72	5502	1771	1402	131	42	5502
	4 cell(1, 1)	2725560	0	0	None	208	293.45	102	219.74	48285.5	952	70	3.81	9288	601	1459	129	72	9288
	4 cell(2, 1)	2739374	0	0	None	212.5	292.67	102	212.79	45279	895	68	3.83	9360	731	1459	130	72	9360
	4 cell(3, 1)	2663888	0	0	None	214	286.81	104	199.99	39994.7	860	71	3.72	9288	860	1459	129	72	9288
	4 cell(4, 1)	2366681	0	0	None	190	252.85	90	163.67	26786.6	729	58	3.3	9360	990	1459	130	72	9360
	4 cell(5, 1)	1682585	0	0	None	143	181.16	123	97.32	9470.82	489	66	2.35	9288	1119	1459	129	72	9288
	4 cell(6, 1)	1338006	0	0	None	123	144.06	95	62.6	3918.76	345	63	1.87	9288	1248	1459	129	72	9288
	4 cell(7, 1)	1291315	0	0	None	114	137.96	95	66.07	4365.35	391	49	1.8	9360	1378	1459	130	72	9360
	4 cell(8, 1)	1088436	0	0	None	108	117.19	89	36.3	1317.57	264	52	1.52	9288	1507	1459	129	72	9288
	4 cell(9, 1)	1056241	0	0	None	106	112.85	102	31.34	982.24	222	53	1.47	9360	1637	1459	130	72	9360
	4 cell(10, 1)	939247	0	0	None	99	101.12	97	18.53	343.23	175	49	1.31	9288	1766	1459	129	72	9288
	5 cell(1, 1)	3239130	0	0	None	140	205.69	114	157.2	24710.3	827	53	4.52	15748	602	1557	127	124	15748
	5 cell(2, 1)	3054680	0	0	None	132	192.46	98	142.98	20442.1	713	54	4.27	15872	730	1557	128	124	15872
	5 cell(3, 1)	2989127	0	0	None	131	189.81	98	138.6	19209.9	654	54	4.17	15748	857	1557	127	124	15748
	5 cell(4, 1)	2929443	0	0	None	122	184.57	84	143.22	20513.4	690	58	4.09	15872	985	1557	128	124	15872
	5 cell(5, 1)	2883933	0	0	None	119	183.13	79	145.88	21280.9	710	48	4.03	15748	1112	1557	127	124	15748
	5 cell(6, 1)	2752848	0	0	None	109	174.81	82	144.98	21020.6	707	50	3.84	15748	1239	1557	127	124	15748
	5 cell(7, 1)	2711037	0	0	None	104	170.81	73	146.62	21497.5	669	47	3.79	15872	1367	1557	128	124	15872
	5 cell(8, 1)	2527754	0	0	None	99	160.51	76	128.96	16630.2	619	43	3.53	15748	1494	1557	127	124	15748
	5 cell(9, 1)	2704425	0	0	None	101	170.39	76	155.72	24249.1	802	46	3.78	15872	1622	1557	128	124	15872
	5 cell(10, 1)	2556891	0	0	None	99	162.36	83	146.96	21598.4	814	46	3.57	15748	1749	1557	127	124	15748
	6	674669	0	0	None	70	70.45	71	8.3	68.9	103	41	0.94	9576	566	993	126	76	9576

## Sheet: App Fract Bound
		Volume	Area		Minus Backg.	Normalization	Bound apparent
50bp	1 cell(1, 1)	2223665	3900		1.94889e+06	1	0
	1 cell(2, 1)	1444722	3930		1.16784e+06	0.599231	0.400769
	1 cell(3, 1)	528822	3900		254051	0.130356	0.869644
	1 cell(4, 1)	497782	3930		220897	0.113345	0.886655
	1 cell(5, 1)	440019	3900		165248	0.0847906	0.915209
	1 cell(6, 1)	402810	3900		128039	0.0656982	0.934302
	1 cell(7, 1)	399844	3930		122959	0.0630918	0.936908
	1 cell(8, 1)	372396	3900		97624.8	0.0500924	0.949908
	1 cell(9, 1)	382985	3930		106100	0.0544412	0.945559
	1 cell(10, 1)	366884	3900		92112.8	0.0472641	0.952736
40bp	2 cell(1, 1)	2373406	4454		2.0596e+06	1	0
	2 cell(2, 1)	1996173	4454		1.68237e+06	0.816842	0.183158
	2 cell(3, 1)	784753	4420		473346	0.229824	0.770176
	2 cell(4, 1)	633122	4454		319319	0.155039	0.844961
	2 cell(5, 1)	513192	4454		199389	0.0968095	0.90319
	2 cell(6, 1)	465410	4454		151607	0.0736099	0.92639
	2 cell(7, 1)	456382	4454		142579	0.0692265	0.930773
	2 cell(8, 1)	427204	4420		115797	0.0562228	0.943777
	2 cell(9, 1)	448447	4454		134644	0.0653738	0.934626
	2 cell(10, 1)	420742	4454		106939	0.0519222	0.948078
30 bp	3 cell(1, 1)	1648637	5502		1.261e+06	1	0
	3 cell(2, 1)	1630524	5544		1.23993e+06	0.983289	0.0167106
	3 cell(3, 1)	1289212	5502		901573	0.714968	0.285032
	3 cell(4, 1)	957909	5544		567311	0.449891	0.550109
	3 cell(5, 1)	705374	5502		317735	0.251971	0.748029
	3 cell(6, 1)	620922	5502		233283	0.184999	0.815001
	3 cell(7, 1)	604340	5544		213742	0.169502	0.830498
	3 cell(8, 1)	566970	5502		179331	0.142214	0.857786
	3 cell(9, 1)	578524	5544		187926	0.14903	0.85097
	3 cell(10, 1)	519145	5502		131506	0.104287	0.895713
20 bp	4 cell(1, 1)	2725560	9288		2.07118e+06	0.995797	0.0042027
	4 cell(2, 1)	2739374	9360		2.07992e+06	1	0
	4 cell(3, 1)	2663888	9288		2.00951e+06	0.966146	0.0338538
	4 cell(4, 1)	2366681	9360		1.70723e+06	0.820814	0.179186
	4 cell(5, 1)	1682585	9288		1.02821e+06	0.494348	0.505652
	4 cell(6, 1)	1338006	9288		683628	0.328679	0.671321
	4 cell(7, 1)	1291315	9360		631864	0.303792	0.696208
	4 cell(8, 1)	1088436	9288		434058	0.208689	0.791311
	4 cell(9, 1)	1056241	9360		396790	0.190772	0.809228
	4 cell(10, 1)	939247	9288		284869	0.136961	0.863039
10 bp	5 cell(1, 1)	3239130	15748		2.12962e+06	1	0
	5 cell(2, 1)	3054680	15872		1.93643e+06	0.909286	0.0907141
	5 cell(3, 1)	2989127	15748		1.87961e+06	0.882607	0.117393
	5 cell(4, 1)	2929443	15872		1.81119e+06	0.850479	0.149521
	5 cell(5, 1)	2883933	15748		1.77442e+06	0.833211	0.166789
	5 cell(6, 1)	2752848	15748		1.64334e+06	0.771658	0.228342
	5 cell(7, 1)	2711037	15872		1.59279e+06	0.747922	0.252078
	5 cell(8, 1)	2527754	15748		1.41824e+06	0.665961	0.334039
	5 cell(9, 1)	2704425	15872		1.58618e+06	0.744817	0.255183
	5 cell(10, 1)	2556891	15748		1.44738e+06	0.679643	0.320357
Background	6	674669	9576		0
