# Supplementary material for: A novel single alpha-helix DNA-binding domain in CAF-1 promotes gene silencing and DNA damage survival through tetrasome-length DNA selectivity and spacer function
Source: eLife journal article supplement (doi:10.7554/elife.83538), 2023-06-14
Supplement: fig6-data1 [file 220120 Cy5 ladder EMSA with hKER_n2_Table.xlsx]

## Sheet: 220120 Cy5 ladder EMSA with hKE
	Name	Volume	Background	Background Level	Background Type	Median Intensity	Average Intensity	Mode Intensity	Std Dev	Variance	Min Intensity	Max Intensity	Percent	Area > Background	Centre X	Centre Y	Width	Height	Area	Comment
	1 cell(1, 1)	2428562	0	0	None	366.5	383.3	112	217.68	47385.6	957	64	3.23	6336	573	1417	132	48	6336
	1 cell(2, 1)	2308619	0	0	None	310	364.37	101	257.33	66219.9	1206	69	3.07	6336	705	1417	132	48	6336
	1 cell(3, 1)	686690	0	0	None	107	108.38	105	20.59	423.79	183	54	0.91	6336	837	1417	132	48	6336
	1 cell(4, 1)	698446	0	0	None	108	110.23	108	21.3	453.69	179	59	0.93	6336	969	1417	132	48	6336
	1 cell(5, 1)	631175	0	0	None	99	99.62	96	14.28	203.95	146	62	0.84	6336	1101	1417	132	48	6336
	1 cell(6, 1)	589217	0	0	None	94	93	94	11.97	143.27	133	54	0.78	6336	1233	1417	132	48	6336
	1 cell(7, 1)	578080	0	0	None	92	91.24	96	12.32	151.88	132	53	0.77	6336	1365	1417	132	48	6336
	1 cell(8, 1)	542690	0	0	None	85	85.65	85	10.89	118.52	122	48	0.72	6336	1497	1417	132	48	6336
	1 cell(9, 1)	531365	0	0	None	84	83.86	81	10.71	114.78	126	49	0.71	6336	1629	1417	132	48	6336
	1 cell(10, 1)	514537	0	0	None	81	81.21	81	9.52	90.62	116	45	0.68	6336	1761	1417	132	48	6336
	2 cell(1, 1)	2110495	0	0	None	397	409.96	220	203.18	41284.1	922	72	2.81	5148	573	1462	132	39	5148
	2 cell(2, 1)	2174128	0	0	None	392.5	422.32	100	223.44	49923.6	980	72	2.89	5148	705	1462	132	39	5148
	2 cell(3, 1)	693709	0	0	None	136	134.75	147	31.55	995.12	217	62	0.92	5148	837	1462	132	39	5148
	2 cell(4, 1)	683040	0	0	None	133	132.68	122	31.33	981.64	220	65	0.91	5148	969	1462	132	39	5148
	2 cell(5, 1)	549843	0	0	None	107	106.81	109	15.97	254.95	162	59	0.73	5148	1101	1462	132	39	5148
	2 cell(6, 1)	495631	0	0	None	97	96.28	99	12.93	167.07	143	49	0.66	5148	1233	1462	132	39	5148
	2 cell(7, 1)	472106	0	0	None	92	91.71	93	12.3	151.26	139	48	0.63	5148	1365	1462	132	39	5148
	2 cell(8, 1)	433013	0	0	None	84	84.11	82	11.4	130	176	50	0.58	5148	1497	1462	132	39	5148
	2 cell(9, 1)	434735	0	0	None	84	84.45	82	10.36	107.32	132	53	0.58	5148	1629	1462	132	39	5148
	2 cell(10, 1)	422590	0	0	None	82	82.09	84	10.14	102.88	115	50	0.56	5148	1761	1462	132	39	5148
	3 cell(1, 1)	1974758	0	0	None	199	224.97	159	105.35	11099.2	523	48	2.63	8778	564	1515	133	66	8778
	3 cell(2, 1)	2009073	0	0	None	193	228.88	154	105.88	11210.2	566	73	2.67	8778	697	1515	133	66	8778
	3 cell(3, 1)	1387279	0	0	None	147	158.04	145	53	2808.83	311	64	1.85	8778	830	1515	133	66	8778
	3 cell(4, 1)	1235748	0	0	None	135	140.78	129	39.38	1551.1	268	62	1.64	8778	963	1515	133	66	8778
	3 cell(5, 1)	931476	0	0	None	107	106.11	112	15.72	247.16	156	61	1.24	8778	1096	1515	133	66	8778
	3 cell(6, 1)	830432	0	0	None	96	95.32	96	12.96	168.03	134	52	1.1	8712	1229	1515	132	66	8712
	3 cell(7, 1)	804483	0	0	None	92	91.65	89	12.51	156.61	140	45	1.07	8778	1361	1515	133	66	8778
	3 cell(8, 1)	748890	0	0	None	85	85.31	85	10.76	115.7	122	50	1	8778	1494	1515	133	66	8778
	3 cell(9, 1)	756054	0	0	None	86	86.13	82	11.13	123.95	127	46	1.01	8778	1627	1515	133	66	8778
	3 cell(10, 1)	729371	0	0	None	83	83.09	81	10.77	116.01	122	49	0.97	8778	1760	1515	133	66	8778
	4 cell(1, 1)	2735556	0	0	None	166	255.85	113	209.11	43725.4	1024	56	3.64	10692	567	1588	132	81	10692
	4 cell(2, 1)	2815985	0	0	None	176	263.37	116	203.29	41328.8	991	65	3.75	10692	699	1588	132	81	10692
	4 cell(3, 1)	2396183	0	0	None	157	224.11	105	151.45	22938.4	635	65	3.19	10692	831	1588	132	81	10692
	4 cell(4, 1)	2338511	0	0	None	145	218.72	94	158.92	25255.8	720	68	3.11	10692	963	1588	132	81	10692
	4 cell(5, 1)	1572420	0	0	None	115	147.07	100	74.11	5492.25	379	65	2.09	10692	1095	1588	132	81	10692
	4 cell(6, 1)	1383659	0	0	None	106	129.41	98	58.47	3418.98	324	57	1.84	10692	1227	1588	132	81	10692
	4 cell(7, 1)	1212833	0	0	None	100	113.43	89	40.63	1650.85	275	49	1.61	10692	1359	1588	132	81	10692
	4 cell(8, 1)	1022957	0	0	None	92	95.67	88	17.62	310.37	159	47	1.36	10692	1491	1588	132	81	10692
	4 cell(9, 1)	1073817	0	0	None	95	100.43	85	22.81	520.43	187	54	1.43	10692	1623	1588	132	81	10692
	4 cell(10, 1)	989376	0	0	None	91	92.53	86	14.41	207.75	144	51	1.32	10692	1755	1588	132	81	10692
	5 cell(1, 1)	3020017	0	0	None	119	186.01	84	155.02	24032.1	877	54	4.02	16236	567	1693	132	123	16236
	5 cell(2, 1)	2943198	0	0	None	127	179.91	83	134.83	18179.6	1242	52	3.92	16359	699	1693	133	123	16359
	5 cell(3, 1)	2645510	0	0	None	113	162.94	87	110.28	12161.8	528	51	3.52	16236	832	1693	132	123	16236
	5 cell(4, 1)	2897089	0	0	None	114	178.44	82	145.28	21105.5	690	47	3.85	16236	964	1693	132	123	16236
	5 cell(5, 1)	2842740	0	0	None	110	173.77	80	138.3	19127.3	674	51	3.78	16359	1096	1693	133	123	16359
	5 cell(6, 1)	2744221	0	0	None	106	169.02	80	134.68	18139.2	642	40	3.65	16236	1229	1693	132	123	16236
	5 cell(7, 1)	2609091	0	0	None	103	160.7	76	124.92	15606.2	599	48	3.47	16236	1361	1693	132	123	16236
	5 cell(8, 1)	2474481	0	0	None	101	152.41	87	110.1	12121	541	45	3.29	16236	1493	1693	132	123	16236
	5 cell(9, 1)	2622996	0	0	None	101	160.34	83	128.93	16623.6	618	47	3.49	16359	1625	1693	133	123	16359
	5 cell(10, 1)	2555587	0	0	None	98	157.4	86	134.13	17989.8	793	39	3.4	16236	1758	1693	132	123	16236
	6	879305	0	0	None	71	70.66	71	8.28	68.48	103	43	1.17	12444	553	1110	122	102	12444

## Sheet: Sheet1
		Volume	Area		Minus Backg.	Normalization	Bound apparent
50bp	1 cell(1, 1)	2428562	6336		1.98085e+06	1	0
	1 cell(2, 1)	2308619	6336		1.86091e+06	0.939449	0.0605512
	1 cell(3, 1)	686690	6336		238982	0.120646	0.879354
	1 cell(4, 1)	698446	6336		250738	0.126581	0.873419
	1 cell(5, 1)	631175	6336		183467	0.0926202	0.90738
	1 cell(6, 1)	589217	6336		141509	0.0714385	0.928562
	1 cell(7, 1)	578080	6336		130372	0.0658161	0.934184
	1 cell(8, 1)	542690	6336		94982.2	0.0479501	0.95205
	1 cell(9, 1)	531365	6336		83657.2	0.0422329	0.957767
	1 cell(10, 1)	514537	6336		66829.2	0.0337375	0.966262
40bp	2 cell(1, 1)	2110495	5148		1.74673e+06	0.964851	0.0351493
	2 cell(2, 1)	2174128	5148		1.81037e+06	1	0
	2 cell(3, 1)	693709	5148		329946	0.182254	0.817746
	2 cell(4, 1)	683040	5148		319277	0.176361	0.823639
	2 cell(5, 1)	549843	5148		186080	0.102786	0.897214
	2 cell(6, 1)	495631	5148		131868	0.0728408	0.927159
	2 cell(7, 1)	472106	5148		108343	0.0598461	0.940154
	2 cell(8, 1)	433013	5148		69250.4	0.0382522	0.961748
	2 cell(9, 1)	434735	5148		70972.4	0.0392033	0.960797
	2 cell(10, 1)	422590	5148		58827.4	0.0324948	0.967505
30 bp	3 cell(1, 1)	1974758	8778		1.3545e+06	0.975292	0.0247082
	3 cell(2, 1)	2009073	8778		1.38881e+06	1	0
	3 cell(3, 1)	1387279	8778		767017	0.552283	0.447717
	3 cell(4, 1)	1235748	8778		615486	0.443175	0.556825
	3 cell(5, 1)	931476	8778		311214	0.224087	0.775913
	3 cell(6, 1)	830432	8712		214834	0.154689	0.845311
	3 cell(7, 1)	804483	8778		184221	0.132647	0.867353
	3 cell(8, 1)	748890	8778		128628	0.0926174	0.907383
	3 cell(9, 1)	756054	8778		135792	0.0977758	0.902224
	3 cell(10, 1)	729371	8778		109109	0.0785629	0.921437
20 bp	4 cell(1, 1)	2735556	10692		1.98005e+06	0.960966	0.0390341
	4 cell(2, 1)	2815985	10692		2.06048e+06	1	0
	4 cell(3, 1)	2396183	10692		1.64068e+06	0.79626	0.20374
	4 cell(4, 1)	2338511	10692		1.583e+06	0.76827	0.23173
	4 cell(5, 1)	1572420	10692		816913	0.396468	0.603532
	4 cell(6, 1)	1383659	10692		628152	0.304857	0.695143
	4 cell(7, 1)	1212833	10692		457326	0.221951	0.778049
	4 cell(8, 1)	1022957	10692		267450	0.1298	0.8702
	4 cell(9, 1)	1073817	10692		318310	0.154484	0.845516
	4 cell(10, 1)	989376	10692		233869	0.113502	0.886498
10 bp	5 cell(1, 1)	3020017	16236		1.87277e+06	1	0
	5 cell(2, 1)	2943198	16359		1.78726e+06	0.95434	0.0456599
	5 cell(3, 1)	2645510	16236		1.49826e+06	0.800025	0.199975
	5 cell(4, 1)	2897089	16236		1.74984e+06	0.93436	0.0656398
	5 cell(5, 1)	2842740	16359		1.6868e+06	0.900699	0.0993014
	5 cell(6, 1)	2744221	16236		1.59697e+06	0.852733	0.147267
	5 cell(7, 1)	2609091	16236		1.46184e+06	0.780578	0.219422
	5 cell(8, 1)	2474481	16236		1.32723e+06	0.7087	0.2913
	5 cell(9, 1)	2622996	16359		1.46705e+06	0.783362	0.216638
	5 cell(10, 1)	2555587	16236		1.40834e+06	0.752008	0.247992
Background	6	879305	12444		0
