# Supplementary material for: A novel single alpha-helix DNA-binding domain in CAF-1 promotes gene silencing and DNA damage survival through tetrasome-length DNA selectivity and spacer function
Source: eLife journal article supplement (doi:10.7554/elife.83538), 2023-06-14
Supplement: fig6-data1 [file 220121 Cy5 ladder EMSA with yCAF1 yKERtohKER_n1_Table.xlsx]

## Sheet: 220121 Cy5 ladder EMSA with yCA
	Name	Volume	Background	Background Level	Background Type	Median Intensity	Average Intensity	Mode Intensity	Std Dev	Variance	Min Intensity	Max Intensity	Percent	Area > Background	Centre X	Centre Y	Width	Height	Area	Comment
	1 cell(1, 1)	2092405	0	0	None	517	520.5	73	355.1	126096	1377	45	2.36	4020	573	1312	134	32	4020
	1 cell(2, 1)	1980839	0	0	None	488	496.33	92	283.15	80176.4	1279	64	2.24	3991	706	1314	133	32	3991
	1 cell(3, 1)	1173356	0	0	None	289.5	296.75	93	155.87	24295.4	705	58	1.33	3954	840	1316	134	32	3954
	1 cell(4, 1)	1088415	0	0	None	268	282.12	82	147.57	21777.8	675	60	1.23	3858	973	1318	133	31	3858
	1 cell(5, 1)	651519	0	0	None	167.5	167.66	192	58.67	3442.09	342	64	0.74	3886	1107	1320	134	31	3886
	1 cell(6, 1)	620045	0	0	None	156	159.56	167	55.83	3117.02	311	57	0.7	3886	1241	1322	134	31	3886
	1 cell(7, 1)	515472	0	0	None	127	133.61	122	37.05	1372.67	250	59	0.58	3858	1374	1324	133	31	3858
	1 cell(8, 1)	420202	0	0	None	104	110	93	28.9	834.96	188	53	0.47	3820	1508	1326	134	31	3820
	1 cell(9, 1)	346352	0	0	None	93	92.98	96	15.61	243.66	141	46	0.39	3725	1641	1329	133	30	3725
	1 cell(10, 1)	336520	0	0	None	90	89.69	93	12.79	163.65	129	48	0.38	3752	1775	1331	134	30	3752
	2 cell(1, 1)	2289860	0	0	None	513	542.75	87	307.7	94679	1292	45	2.59	4219	587	1346	133	34	4219
	2 cell(2, 1)	2168119	0	0	None	489	509.91	89	288.87	83447.6	1193	60	2.45	4252	719	1347	134	33	4252
	2 cell(3, 1)	1896920	0	0	None	440	449.61	94	239.78	57493.3	1019	66	2.14	4219	850	1349	133	34	4219
	2 cell(4, 1)	1854127	0	0	None	429	436.06	88	229.83	52822.5	985	67	2.1	4252	982	1350	134	33	4252
	2 cell(5, 1)	1241534	0	0	None	287	294.27	94	142.31	20251.6	619	57	1.4	4219	1113	1352	133	34	4219
	2 cell(6, 1)	1151659	0	0	None	265	272.97	204	125.82	15829.7	549	62	1.3	4219	1244	1354	133	34	4219
	2 cell(7, 1)	795835	0	0	None	193	187.17	78	65.07	4234.2	321	51	0.9	4252	1376	1355	134	33	4252
	2 cell(8, 1)	494290	0	0	None	112	117.16	105	27.99	783.36	212	55	0.56	4219	1507	1357	133	34	4219
	2 cell(9, 1)	405056	0	0	None	96	95.26	99	14.68	215.36	144	52	0.46	4252	1639	1358	134	33	4252
	2 cell(10, 1)	384454	0	0	None	93	91.12	95	12.88	165.91	135	49	0.43	4219	1770	1360	133	34	4219
	3 cell(1, 1)	1844070	0	0	None	266.5	306.02	223	166	27556.8	763	61	2.08	6026	590	1386	131	47	6026
	3 cell(2, 1)	1840668	0	0	None	273	305.4	93	163.62	26770.9	737	74	2.08	6027	721	1388	131	48	6027
	3 cell(3, 1)	1832755	0	0	None	274	306.48	186	155.25	24103.2	725	64	2.07	5980	852	1389	130	47	5980
	3 cell(4, 1)	1860997	0	0	None	284	308.78	98	154.49	23868.4	720	69	2.1	6027	982	1391	131	48	6027
	3 cell(5, 1)	1731728	0	0	None	254	287.38	191	143.45	20577	672	64	1.96	6026	1113	1392	131	47	6026
	3 cell(6, 1)	1687235	0	0	None	256	279.99	89	136.11	18525	647	71	1.91	6026	1244	1393	131	47	6026
	3 cell(7, 1)	1371012	0	0	None	219	227.48	154	97.43	9491.65	439	58	1.55	6027	1375	1395	131	48	6027
	3 cell(8, 1)	976108	0	0	None	157	163.23	121	57.41	3295.34	301	56	1.1	5980	1506	1396	130	47	5980
	3 cell(9, 1)	714888	0	0	None	117	118.61	113	29.09	846	200	52	0.81	6027	1636	1398	131	48	6027
	3 cell(10, 1)	657377	0	0	None	107	109.09	115	25.83	667.16	180	48	0.74	6026	1767	1399	131	47	6026
	4 cell(1, 1)	2698091	0	0	None	186	286.06	114	228.22	52084.6	999	58	3.05	9432	596	1445	131	73	9432
	4 cell(2, 1)	2735715	0	0	None	194	290.02	97	220.56	48645.8	944	61	3.09	9433	727	1447	131	74	9433
	4 cell(3, 1)	2671929	0	0	None	199	285.46	117	205.66	42297.5	853	59	3.02	9360	858	1448	130	73	9360
	4 cell(4, 1)	2701409	0	0	None	198	286.38	116	205.35	42168.9	870	68	3.05	9433	988	1450	131	74	9433
	4 cell(5, 1)	2756878	0	0	None	205	292.29	103	213.32	45504.9	1028	71	3.12	9432	1119	1451	131	73	9432
	4 cell(6, 1)	2883746	0	0	None	218	305.74	101	230	52898.8	981	69	3.26	9432	1250	1452	131	73	9432
	4 cell(7, 1)	2516320	0	0	None	173	266.76	93	205.42	42197.8	811	54	2.84	9433	1381	1454	131	74	9433
	4 cell(8, 1)	2220326	0	0	None	169	237.21	104	172.83	29869.4	776	53	2.51	9360	1512	1455	130	73	9360
	4 cell(9, 1)	1617069	0	0	None	124	171.43	112	105.99	11234.7	501	51	1.83	9433	1642	1457	131	74	9433
	4 cell(10, 1)	1460968	0	0	None	116	154.89	100	95.98	9211.88	485	46	1.65	9432	1773	1458	131	73	9432
	5 cell(1, 1)	2782375	0	0	None	130	203.33	83	168.8	28494.5	885	40	3.14	13684	596	1535	134	108	13684
	5 cell(2, 1)	2778358	0	0	None	134	203.1	96	157.59	24834.7	757	50	3.14	13680	726	1536	134	107	13680
	5 cell(3, 1)	2698555	0	0	None	131	197.21	94	150.02	22506.9	692	47	3.05	13684	856	1538	134	108	13684
	5 cell(4, 1)	2724284	0	0	None	131	199.14	95	154.37	23830.9	710	55	3.08	13680	986	1539	134	107	13680
	5 cell(5, 1)	2727159	0	0	None	130	199.3	89	157.41	24776.8	725	55	3.08	13684	1116	1541	134	108	13684
	5 cell(6, 1)	2804592	0	0	None	131	204.95	94	171.73	29490.1	824	49	3.17	13684	1246	1543	134	108	13684
	5 cell(7, 1)	2603548	0	0	None	123	190.32	84	144.63	20916.8	665	57	2.94	13680	1376	1544	134	107	13680
	5 cell(8, 1)	2619289	0	0	None	122	191.41	87	156.16	24386.5	759	39	2.96	13684	1506	1546	134	108	13684
	5 cell(9, 1)	2641229	0	0	None	121	193.07	83	160.65	25807.6	772	52	2.99	13680	1636	1547	134	107	13680
	5 cell(10, 1)	2605677	0	0	None	111	190.42	82	185.24	34314.2	986	47	2.94	13684	1766	1549	134	108	13684
	6	810916	0	0	None	70	69.57	71	7.94	63.04	100	34	0.92	11656	587	1064	124	94	11656

## Sheet: App Fract Bound
		Volume	Area		Minus Backg.	Normalization	Bound apparent
50bp	1 cell(1, 1)	2092405	4020		1.81273e+06	1	0
	1 cell(2, 1)	1980839	3991		1.70318e+06	0.939567	0.0604328
	1 cell(3, 1)	1173356	3954		898273	0.495536	0.504464
	1 cell(4, 1)	1088415	3858		820011	0.452362	0.547638
	1 cell(5, 1)	651519	3886		381167	0.210272	0.789728
	1 cell(6, 1)	620045	3886		349693	0.19291	0.80709
	1 cell(7, 1)	515472	3858		247068	0.136296	0.863704
	1 cell(8, 1)	420202	3820		154442	0.0851985	0.914801
	1 cell(9, 1)	346352	3725		87201.2	0.0481049	0.951895
	1 cell(10, 1)	336520	3752		75490.8	0.0416448	0.958355
40bp	2 cell(1, 1)	2289860	4219		1.99634e+06	1	0
	2 cell(2, 1)	2168119	4252		1.8723e+06	0.937868	0.0621321
	2 cell(3, 1)	1896920	4219		1.6034e+06	0.80317	0.19683
	2 cell(4, 1)	1854127	4252		1.55831e+06	0.780584	0.219416
	2 cell(5, 1)	1241534	4219		948015	0.474876	0.525124
	2 cell(6, 1)	1151659	4219		858140	0.429856	0.570144
	2 cell(7, 1)	795835	4252		500020	0.250468	0.749532
	2 cell(8, 1)	494290	4219		200771	0.10057	0.89943
	2 cell(9, 1)	405056	4252		109241	0.0547208	0.945279
	2 cell(10, 1)	384454	4219		90935.2	0.045551	0.954449
30 bp	3 cell(1, 1)	1844070	6026		1.42484e+06	0.988307	0.0116928
	3 cell(2, 1)	1840668	6027		1.42137e+06	0.985899	0.0141008
	3 cell(3, 1)	1832755	5980		1.41672e+06	0.982679	0.0173214
	3 cell(4, 1)	1860997	6027		1.44169e+06	1	0
	3 cell(5, 1)	1731728	6026		1.3125e+06	0.910384	0.0896164
	3 cell(6, 1)	1687235	6026		1.268e+06	0.879522	0.120478
	3 cell(7, 1)	1371012	6027		951709	0.660133	0.339867
	3 cell(8, 1)	976108	5980		560075	0.388484	0.611516
	3 cell(9, 1)	714888	6027		295585	0.205026	0.794974
	3 cell(10, 1)	657377	6026		238144	0.165183	0.834817
20 bp	4 cell(1, 1)	2698091	9432		2.0419e+06	0.916655	0.0833447
	4 cell(2, 1)	2735715	9433		2.07945e+06	0.933514	0.0664857
	4 cell(3, 1)	2671929	9360		2.02075e+06	0.907159	0.0928408
	4 cell(4, 1)	2701409	9433		2.04515e+06	0.918114	0.0818864
	4 cell(5, 1)	2756878	9432		2.10069e+06	0.943046	0.0569539
	4 cell(6, 1)	2883746	9432		2.22756e+06	1	0
	4 cell(7, 1)	2516320	9433		1.86006e+06	0.835023	0.164977
	4 cell(8, 1)	2220326	9360		1.56914e+06	0.704424	0.295576
	4 cell(9, 1)	1617069	9433		960809	0.431329	0.568671
	4 cell(10, 1)	1460968	9432		804777	0.361283	0.638717
10 bp	5 cell(1, 1)	2782375	13684		1.83037e+06	0.988008	0.0119924
	5 cell(2, 1)	2778358	13680		1.82663e+06	0.985989	0.0140105
	5 cell(3, 1)	2698555	13684		1.74655e+06	0.942763	0.0572373
	5 cell(4, 1)	2724284	13680		1.77256e+06	0.956801	0.0431989
	5 cell(5, 1)	2727159	13684		1.77515e+06	0.958203	0.0417972
	5 cell(6, 1)	2804592	13684		1.85259e+06	1	0
	5 cell(7, 1)	2603548	13680		1.65182e+06	0.89163	0.10837
	5 cell(8, 1)	2619289	13684		1.66728e+06	0.899976	0.100024
	5 cell(9, 1)	2641229	13680		1.6895e+06	0.911969	0.0880308
	5 cell(10, 1)	2605677	13684		1.65367e+06	0.892629	0.107371
Background	6	810916	11656		0
