# Supplementary material for: A novel single alpha-helix DNA-binding domain in CAF-1 promotes gene silencing and DNA damage survival through tetrasome-length DNA selectivity and spacer function
Source: eLife journal article supplement (doi:10.7554/elife.83538), 2023-06-14
Supplement: fig6-data1 [file 220121 Cy5 ladder EMSA with yCAF1 yKERtohKER_n2_Table.xlsx]

## Sheet: 220121 Cy5 ladder EMSA with yCA
	Name	Volume	Background	Background Level	Background Type	Median Intensity	Average Intensity	Mode Intensity	Std Dev	Variance	Min Intensity	Max Intensity	Percent	Area > Background	Centre X	Centre Y	Width	Height	Area	Comment
	1 cell(1, 1)	2090731	0	0	None	427	434.66	101	263.91	69650.6	1078	75	2.26	4810	596	1455	130	39	4810
	1 cell(2, 1)	1928089	0	0	None	395	400.85	92	230.54	53148.6	1005	73	2.08	4810	726	1457	130	39	4810
	1 cell(3, 1)	1166091	0	0	None	227	242.43	81	122.31	14959.2	554	60	1.26	4810	856	1459	130	38	4810
	1 cell(4, 1)	1236996	0	0	None	254.5	257.17	119	127.6	16281.3	607	57	1.34	4810	986	1460	130	39	4810
	1 cell(5, 1)	629332	0	0	None	128	129.81	138	31.23	975.46	221	61	0.68	4848	1116	1462	131	39	4848
	1 cell(6, 1)	549196	0	0	None	109	114.18	105	25.97	674.48	200	63	0.59	4810	1247	1464	130	39	4810
	1 cell(7, 1)	498786	0	0	None	102	103.7	103	20.89	436.36	167	54	0.54	4810	1377	1466	130	39	4810
	1 cell(8, 1)	447742	0	0	None	92	93.09	87	15.52	240.74	154	44	0.48	4810	1507	1468	130	38	4810
	1 cell(9, 1)	436685	0	0	None	88	90.79	84	17.32	300.05	144	47	0.47	4810	1637	1469	130	39	4810
	1 cell(10, 1)	436302	0	0	None	90	90.71	89	13.83	191.4	138	43	0.47	4810	1767	1471	130	39	4810
	2 cell(1, 1)	2643302	0	0	None	344	403.5	236	224.74	50509.7	975	67	2.86	6551	591	1504	131	52	6551
	2 cell(2, 1)	2607057	0	0	None	360	398.02	93	213.38	45532.2	941	60	2.82	6550	722	1505	131	51	6550
	2 cell(3, 1)	1988310	0	0	None	279	305.89	211	154.52	23877.4	742	58	2.15	6500	853	1507	130	52	6500
	2 cell(4, 1)	2326376	0	0	None	322.5	355.17	194	185.8	34520.5	842	69	2.51	6550	983	1508	131	51	6550
	2 cell(5, 1)	1355986	0	0	None	188	206.99	133	89.65	8037.93	434	58	1.46	6551	1114	1510	131	52	6551
	2 cell(6, 1)	1108908	0	0	None	160	169.27	108	63.91	4084.59	331	49	1.2	6551	1245	1512	131	52	6551
	2 cell(7, 1)	913441	0	0	None	135	139.46	113	42.34	1793.09	248	58	0.99	6550	1376	1513	131	51	6550
	2 cell(8, 1)	720908	0	0	None	111	110.91	106	22.28	496.38	179	49	0.78	6500	1507	1515	130	52	6500
	2 cell(9, 1)	617149	0	0	None	92	94.22	88	17.95	322.37	151	50	0.67	6550	1637	1516	131	51	6550
	2 cell(10, 1)	607680	0	0	None	93	92.76	90	14.26	203.26	146	46	0.66	6551	1768	1518	131	52	6551
	3 cell(1, 1)	2043456	0	0	None	208	242.03	163	114.81	13181.8	583	62	2.21	8443	590	1561	133	66	8443
	3 cell(2, 1)	2064309	0	0	None	209	244.5	170	118.38	14013.2	574	71	2.23	8443	721	1563	133	66	8443
	3 cell(3, 1)	1698836	0	0	None	171	201.24	135	89.96	8092.82	495	63	1.84	8442	852	1565	133	67	8442
	3 cell(4, 1)	1983422	0	0	None	200	234.92	142	113.79	12949.1	563	65	2.14	8443	983	1568	133	66	8443
	3 cell(5, 1)	1849522	0	0	None	189	219.06	142	101.66	10334.8	494	66	2	8443	1114	1570	133	66	8443
	3 cell(6, 1)	1699413	0	0	None	176	201.28	142	91.58	8386.98	471	64	1.84	8443	1245	1572	133	66	8443
	3 cell(7, 1)	1560972	0	0	None	161	184.88	137	84.93	7212.64	429	58	1.69	8443	1376	1574	133	66	8443
	3 cell(8, 1)	1332526	0	0	None	141	157.84	112	62.87	3952.04	335	54	1.44	8442	1507	1576	133	67	8442
	3 cell(9, 1)	981365	0	0	None	110	116.23	99	34.8	1210.72	224	48	1.06	8443	1638	1579	133	66	8443
	3 cell(10, 1)	904130	0	0	None	103	107.09	98	26.33	693.45	199	46	0.98	8443	1769	1581	133	66	8443
	4 cell(1, 1)	2796614	0	0	None	192	290.38	100	233.65	54590.3	1024	70	3.02	9631	589	1634	135	76	9631
	4 cell(2, 1)	2832538	0	0	None	193	294.11	104	240.3	57745.1	1095	65	3.06	9631	720	1636	135	76	9631
	4 cell(3, 1)	2392995	0	0	None	179	250.42	98	173.8	30204.9	835	67	2.59	9556	851	1638	134	76	9556
	4 cell(4, 1)	2804013	0	0	None	193	291.14	97	238.37	56820	1093	62	3.03	9631	981	1640	135	76	9631
	4 cell(5, 1)	2761374	0	0	None	192	286.72	104	229.17	52520.5	982	69	2.98	9631	1112	1642	135	76	9631
	4 cell(6, 1)	2690000	0	0	None	188	279.31	99	218.83	47885.4	933	62	2.91	9631	1243	1644	135	76	9631
	4 cell(7, 1)	2620749	0	0	None	177	272.12	93	219.82	48320.3	970	62	2.83	9631	1374	1646	135	76	9631
	4 cell(8, 1)	2389784	0	0	None	165	250.08	92	196.32	38541.5	845	60	2.58	9556	1505	1648	134	76	9556
	4 cell(9, 1)	1719802	0	0	None	123	178.57	97	127.71	16310.1	591	49	1.86	9631	1635	1650	135	76	9631
	4 cell(10, 1)	1565484	0	0	None	114	162.55	104	113.83	12958.2	562	47	1.69	9631	1766	1652	135	76	9631
	5 cell(1, 1)	2833639	0	0	None	151	225.82	104	174.47	30440.5	853	48	3.06	12548	595	1739	131	99	12548
	5 cell(2, 1)	2890228	0	0	None	152	230.28	96	179.79	32325.8	868	58	3.12	12551	724	1741	131	100	12551
	5 cell(3, 1)	2419894	0	0	None	138	192.85	88	125.43	15733.9	626	61	2.61	12548	853	1742	131	99	12548
	5 cell(4, 1)	2748828	0	0	None	139	219.01	87	175.02	30633.2	859	56	2.97	12551	982	1744	131	100	12551
	5 cell(5, 1)	2731868	0	0	None	136	217.71	98	174.19	30341.3	832	53	2.95	12548	1111	1745	131	99	12548
	5 cell(6, 1)	2645921	0	0	None	133	210.86	90	167	27890.5	757	52	2.86	12548	1240	1746	131	99	12548
	5 cell(7, 1)	2586073	0	0	None	128	206.05	85	166.83	27832.8	776	49	2.79	12551	1369	1748	131	100	12551
	5 cell(8, 1)	2584016	0	0	None	129	205.93	84	163.8	26830.6	776	46	2.79	12548	1498	1749	131	99	12548
	5 cell(9, 1)	2556392	0	0	None	126	203.68	85	171.5	29413.5	807	51	2.76	12551	1627	1751	131	100	12551
	5 cell(10, 1)	2687013	0	0	None	121	214.14	83	200.63	40253.4	1053	45	2.9	12548	1756	1752	131	99	12548
	6	875816	0	0	None	68	67.91	70	8.09	65.38	99	35	0.95	12896	586	1112	124	104	12896

## Sheet: App Fract bound
		Volume	Area		Minus Backg.	Normalization	Bound apparent
50bp	1 cell(1, 1)	2090731	4810		1.76407e+06	1	0
	1 cell(2, 1)	1928089	4810		1.60142e+06	0.907803	0.0921972
	1 cell(3, 1)	1166091	4810		839426	0.475847	0.524153
	1 cell(4, 1)	1236996	4810		910331	0.516041	0.483959
	1 cell(5, 1)	629332	4848		300086	0.17011	0.82989
	1 cell(6, 1)	549196	4810		222531	0.126147	0.873853
	1 cell(7, 1)	498786	4810		172121	0.0975705	0.90243
	1 cell(8, 1)	447742	4810		121077	0.0686351	0.931365
	1 cell(9, 1)	436685	4810		110020	0.0623672	0.937633
	1 cell(10, 1)	436302	4810		109637	0.06215	0.93785
40bp	2 cell(1, 1)	2643302	6551		2.1984e+06	1	0
	2 cell(2, 1)	2607057	6550		2.16222e+06	0.983544	0.0164561
	2 cell(3, 1)	1988310	6500		1.54687e+06	0.703635	0.296365
	2 cell(4, 1)	2326376	6550		1.88154e+06	0.855869	0.144131
	2 cell(5, 1)	1355986	6551		911083	0.41443	0.58557
	2 cell(6, 1)	1108908	6551		664005	0.30204	0.69796
	2 cell(7, 1)	913441	6550		468606	0.213158	0.786842
	2 cell(8, 1)	720908	6500		279468	0.127124	0.872876
	2 cell(9, 1)	617149	6550		172314	0.0783815	0.921619
	2 cell(10, 1)	607680	6551		162777	0.0740434	0.925957
30 bp	3 cell(1, 1)	2043456	8443		1.47006e+06	0.986013	0.0139867
	3 cell(2, 1)	2064309	8443		1.49091e+06	1	0
	3 cell(3, 1)	1698836	8442		1.12551e+06	0.754912	0.245088
	3 cell(4, 1)	1983422	8443		1.41003e+06	0.945747	0.0542533
	3 cell(5, 1)	1849522	8443		1.27613e+06	0.855936	0.144064
	3 cell(6, 1)	1699413	8443		1.12602e+06	0.755253	0.244747
	3 cell(7, 1)	1560972	8443		987576	0.662397	0.337603
	3 cell(8, 1)	1332526	8442		759198	0.509217	0.490783
	3 cell(9, 1)	981365	8443		407969	0.273637	0.726363
	3 cell(10, 1)	904130	8443		330734	0.221833	0.778167
20 bp	4 cell(1, 1)	2796614	9631		2.14254e+06	0.983509	0.0164905
	4 cell(2, 1)	2832538	9631		2.17846e+06	1	0
	4 cell(3, 1)	2392995	9556		1.74401e+06	0.80057	0.19943
	4 cell(4, 1)	2804013	9631		2.14994e+06	0.986906	0.0130941
	4 cell(5, 1)	2761374	9631		2.1073e+06	0.967333	0.0326671
	4 cell(6, 1)	2690000	9631		2.03592e+06	0.934569	0.0654306
	4 cell(7, 1)	2620749	9631		1.96667e+06	0.90278	0.0972196
	4 cell(8, 1)	2389784	9556		1.7408e+06	0.799096	0.200904
	4 cell(9, 1)	1719802	9631		1.06572e+06	0.48921	0.51079
	4 cell(10, 1)	1565484	9631		911406	0.418372	0.581628
10 bp	5 cell(1, 1)	2833639	12548		1.98146e+06	0.972331	0.0276691
	5 cell(2, 1)	2890228	12551		2.03784e+06	1	0
	5 cell(3, 1)	2419894	12548		1.56771e+06	0.7693	0.2307
	5 cell(4, 1)	2748828	12551		1.89644e+06	0.930613	0.0693871
	5 cell(5, 1)	2731868	12548		1.87969e+06	0.92239	0.0776097
	5 cell(6, 1)	2645921	12548		1.79374e+06	0.880215	0.119785
	5 cell(7, 1)	2586073	12551		1.73369e+06	0.850747	0.149253
	5 cell(8, 1)	2584016	12548		1.73183e+06	0.849837	0.150163
	5 cell(9, 1)	2556392	12551		1.70401e+06	0.836182	0.163818
	5 cell(10, 1)	2687013	12548		1.83483e+06	0.900379	0.0996207
Background	6	875816	12896		0
