# Supplementary material for: A novel single alpha-helix DNA-binding domain in CAF-1 promotes gene silencing and DNA damage survival through tetrasome-length DNA selectivity and spacer function
Source: eLife journal article supplement (doi:10.7554/elife.83538), 2023-06-14
Supplement: fig6-figsupp1-data1 [file hKER melting_n1.xlsx]

## Sheet: Sheet1
Temperature [C]	CD [mdeg]	HT [V]
4.19	-22.4142	324.355
5.03	-23.1435	324.372
6.04	-21.6434	324.386
7	-22.3464	324.346
8.03	-22.3313	324.337
9.02	-22.0379	324.344
10.01	-21.5386	324.323
11	-21.2738	324.327
12.01	-20.8569	324.319
13.01	-20.4167	324.336
14.01	-20.8339	324.323
15.05	-19.9991	324.368
16.02	-19.474	324.334
17.02	-18.828	324.364
18.02	-18.737	324.336
19	-17.8062	324.354
20	-18.3877	324.363
21	-16.9349	324.328
22.02	-16.9738	324.36
23.05	-16.3811	324.358
24.03	-15.3168	324.337
25.02	-15.6312	324.378
26.01	-15.8903	324.353
27	-14.4167	324.387
28.04	-13.9608	324.403
29.05	-13.7816	324.437
30.06	-13.8469	324.425
31.03	-13.8752	324.442
32.03	-12.7521	324.51
33.04	-12.2215	324.446
34.03	-11.9466	324.408
35.02	-11.7744	324.403
36.02	-10.5718	324.487
37.02	-10.3134	324.534
38.02	-10.2255	324.536
39.02	-9.80311	324.556
40	-10.03	324.564
41.04	-8.4121	324.458
42	-9.42615	324.488
43.03	-9.10705	324.5
44.01	-8.75105	324.575
45.02	-7.7005	324.595
46.04	-7.70117	324.612
47	-6.93609	324.702
48	-6.45592	324.698
49.03	-7.65529	324.746
50.03	-6.71088	324.768
51.05	-5.95684	324.771
52.02	-6.7003	324.746
53.03	-6.17332	324.835
54.02	-5.59392	324.827
55.03	-6.09749	324.901
56.03	-6.13251	324.888
57.03	-5.85094	324.948
58	-5.18787	325.013
59.05	-5.4604	325.018
60	-5.20552	325.016
61.02	-4.47812	325.127
62.02	-4.48373	325.182
63.01	-5.20883	325.152
64.05	-4.96115	325.24
65.02	-3.8708	325.277
66.05	-4.44159	325.309
67.01	-4.6256	325.354
68.02	-4.06008	325.355
69.02	-4.17184	325.474
70.01	-4.75975	325.474
71.02	-3.9864	325.505
72.02	-4.2424	325.573
73.02	-4.23798	325.599
74	-4.40907	325.698
75	-4.62542	325.644
76.04	-3.45678	325.758
77.01	-3.84063	325.807
78.01	-4.09395	325.925
79.02	-3.74895	326.035
80.01	-4.40154	326.049
81.05	-3.19444	326.163
82.02	-3.15858	326.296
83.04	-4.05469	326.404
84.02	-3.38723	326.452
85.03	-3.45096	326.598
86.07	-3.81187	326.662
87.05	-3.22072	326.831
88.04	-3.82187	326.922
89.03	-3.43799	327.037
90.04	-3.21728	327.189
91.04	-3.43898	327.309
92.01	-4.03615	327.508
93.01	-4.2895	327.706
94.02	-3.1561	327.866
95.02	-3.97767	328.083
96.06	-3.6201	328.295
97.03	-3.42009	328.566
98.02	-3.34617	328.746
99.01	-3.09266	329.048
100.03	-3.67157	329.303
