# Supplementary material for: A novel single alpha-helix DNA-binding domain in CAF-1 promotes gene silencing and DNA damage survival through tetrasome-length DNA selectivity and spacer function
Source: eLife journal article supplement (doi:10.7554/elife.83538), 2023-06-14
Supplement: fig6-figsupp1-data1 [file hKER melting_n2.xlsx]

## Sheet: Sheet1
Temperature [C]	CD [mdeg]	HT [V]
4.29	-23.2236	326.983
5.01	-23.8248	326.903
6.01	-23.4766	326.892
7.02	-22.8793	326.877
8.01	-22.2574	326.833
9.03	-22.4872	326.815
10.02	-22.1942	326.763
11.01	-21.076	326.73
12	-21.218	326.712
13.01	-21.0538	326.75
14	-20.4804	326.622
15.01	-20.0848	326.61
16.01	-19.5949	326.584
17.02	-19.8902	326.596
18.03	-19.296	326.637
19.03	-19.379	326.562
20.03	-18.6404	326.592
21.03	-18.4347	326.595
22.03	-17.7244	326.516
23.04	-17.7057	326.509
24.02	-17.6801	326.559
25.02	-17.2305	326.579
26.02	-16.7827	326.458
27.02	-15.9745	326.561
28.04	-15.5408	326.523
29.01	-14.6656	326.437
30.02	-13.8502	326.521
31	-14.1453	326.479
32.03	-13.8775	326.524
33.03	-13.1305	326.525
34.01	-12.1936	326.466
35.02	-12.3926	326.535
36.01	-11.983	326.474
37	-11.144	326.543
38.04	-11.4616	326.546
39.04	-11.2	326.488
40.02	-10.7521	326.584
41.03	-10.0819	326.497
42.04	-9.98411	326.548
43	-9.2101	326.561
44.02	-9.13826	326.55
45.01	-9.04428	326.555
46.04	-8.98879	326.611
47.01	-8.33247	326.607
48.04	-7.31393	326.628
49.03	-7.61773	326.635
50.03	-7.57995	326.638
51	-6.82443	326.677
52.03	-7.22655	326.658
53.02	-7.79727	326.684
54.02	-6.13248	326.737
55.04	-6.53015	326.736
56.03	-6.13648	326.719
57.04	-6.06137	326.803
58.04	-6.2538	326.791
59.06	-5.52439	326.88
60.01	-5.61295	326.801
61.01	-5.43359	326.887
62.04	-5.01998	326.885
63	-5.68059	326.878
64.05	-5.20341	326.967
65.01	-5.14144	326.998
66.01	-4.42233	327.019
67.01	-4.46046	327.076
68.01	-5.41335	327.112
69	-3.76907	327.16
70.03	-4.10723	327.13
71.01	-4.12475	327.156
72	-4.02855	327.19
73.01	-4.94778	327.265
74.04	-3.84264	327.262
75.02	-4.09648	327.353
76.03	-4.06348	327.435
77	-4.98907	327.451
78.02	-4.48777	327.538
79.02	-3.94492	327.618
80.03	-4.6394	327.654
81.04	-4.13487	327.703
82.03	-3.56689	327.829
83.04	-4.43782	327.857
84.04	-2.94477	327.914
85.03	-4.11755	327.979
86.05	-4.19341	328.07
87	-4.00087	328.177
88.06	-3.6045	328.305
89.01	-3.83854	328.293
90.02	-3.43089	328.472
91.03	-3.42932	328.621
92.01	-3.52771	328.794
93.05	-3.45907	328.902
94.04	-3.75312	329.063
95.07	-3.60144	329.257
96.06	-3.82551	329.417
97.02	-3.51855	329.564
98.01	-2.96115	329.745
99.04	-2.83735	329.986
100.02	-3.02079	330.249
