# Supplementary material for: A novel single alpha-helix DNA-binding domain in CAF-1 promotes gene silencing and DNA damage survival through tetrasome-length DNA selectivity and spacer function
Source: eLife journal article supplement (doi:10.7554/elife.83538), 2023-06-14
Supplement: fig6-figsupp1-data1 [file hKER melting_n3.xlsx]

## Sheet: Sheet1
Temperature [C]	CD [mdeg]	HT [V]
4.29	-26.577	328.805
5	-25.5336	328.761
6.03	-26.4818	328.667
7.04	-24.9217	328.684
8.02	-25.266	328.612
9	-25.1381	328.559
10.03	-24.1824	328.539
11.01	-24.3918	328.504
12.01	-23.7471	328.444
13.01	-23.6466	328.449
14.02	-22.6801	328.421
15.02	-22.3157	328.304
16.03	-21.6268	328.41
17.02	-21.5321	328.356
18	-21.0183	328.342
19	-20.7152	328.382
20.03	-20.27	328.344
21.02	-20.1214	328.346
22.01	-20.181	328.269
23.02	-18.7475	328.389
24.02	-18.9626	328.375
25.02	-18.4216	328.367
26.02	-18.6001	328.377
27.04	-17.3843	328.303
28.02	-16.5505	328.296
29.03	-16.2637	328.292
30.03	-15.8405	328.324
31.01	-15.5843	328.269
32.03	-14.2559	328.293
33.02	-14.3827	328.331
34.01	-14.44	328.338
35.02	-13.7064	328.274
36.02	-12.639	328.238
37.02	-13.2339	328.201
38.01	-12.3976	328.271
39.02	-11.0722	328.282
40.01	-11.5384	328.246
41.02	-11.307	328.256
42	-10.7533	328.321
43.03	-10.0868	328.363
44.03	-9.81274	328.362
45.02	-9.12864	328.346
46.03	-8.98394	328.308
47.02	-8.68291	328.331
48.07	-8.72415	328.391
49.02	-8.51955	328.397
50	-8.7501	328.269
51.03	-8.1397	328.281
52.03	-7.66598	328.395
53.04	-6.73687	328.369
54.03	-7.40015	328.432
55.02	-6.38459	328.472
56.05	-6.65392	328.503
57.02	-7.11638	328.521
58	-6.46656	328.54
59.05	-6.56834	328.56
60.04	-6.26877	328.649
61.01	-5.72196	328.615
62.02	-4.87174	328.63
63.02	-5.29116	328.671
64.09	-5.53649	328.666
65.01	-5.47681	328.697
66.05	-4.76375	328.731
67.03	-4.95823	328.752
68	-5.54759	328.8
69.03	-5.67972	328.871
70.02	-4.67194	328.833
71.01	-4.9588	328.906
72.02	-4.53551	328.973
73.02	-4.74793	329.007
74.02	-4.85607	329.026
75.02	-4.52337	329.037
76.02	-4.35795	329.06
77.01	-4.67863	329.191
78.03	-5.39533	329.218
79.03	-4.58742	329.202
80.06	-3.53396	329.286
81.01	-4.54904	329.285
82.03	-4.00258	329.422
83.03	-4.47957	329.508
84.01	-3.88388	329.6
85.03	-4.03062	329.658
86.01	-4.26324	329.647
87.02	-3.764	329.75
88.03	-4.45931	329.874
89.1	-4.66844	329.969
90.01	-4.27093	330.063
91.02	-3.80794	330.305
92.02	-3.53648	330.322
93.05	-3.65594	330.484
94.05	-3.80743	330.614
95.06	-4.2343	330.744
96.03	-4.20327	330.982
97.03	-4.33367	331.071
98.05	-4.01392	331.161
99.02	-3.76095	331.425
100.01	-3.64741	331.629
