# Supplementary figures and images for: A novel single alpha-helix DNA-binding domain in CAF-1 promotes gene silencing and DNA damage survival through tetrasome-length DNA selectivity and spacer function
Source: eLife journal article supplement (doi:10.7554/elife.83538), 2023-06-14

AAAAAAAA

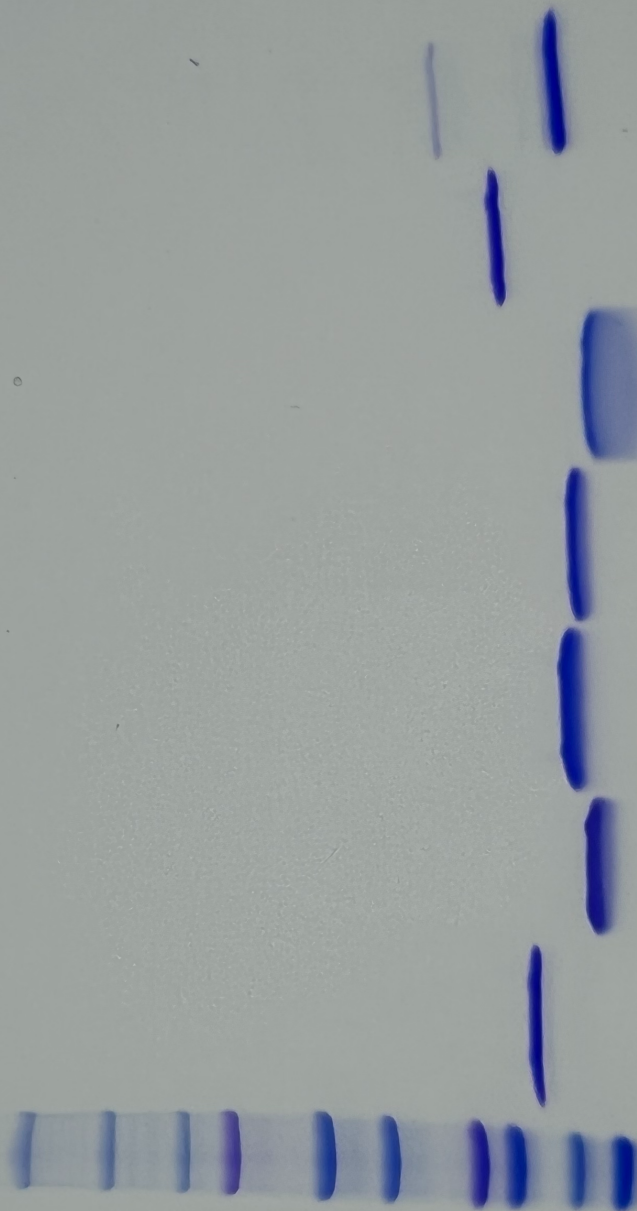

Supplement: fig1-figsupp2-data1 [file elife-83538-fig1-figsupp2-data1-v1.zip]

Other yCAF1 mutatin not used in this study

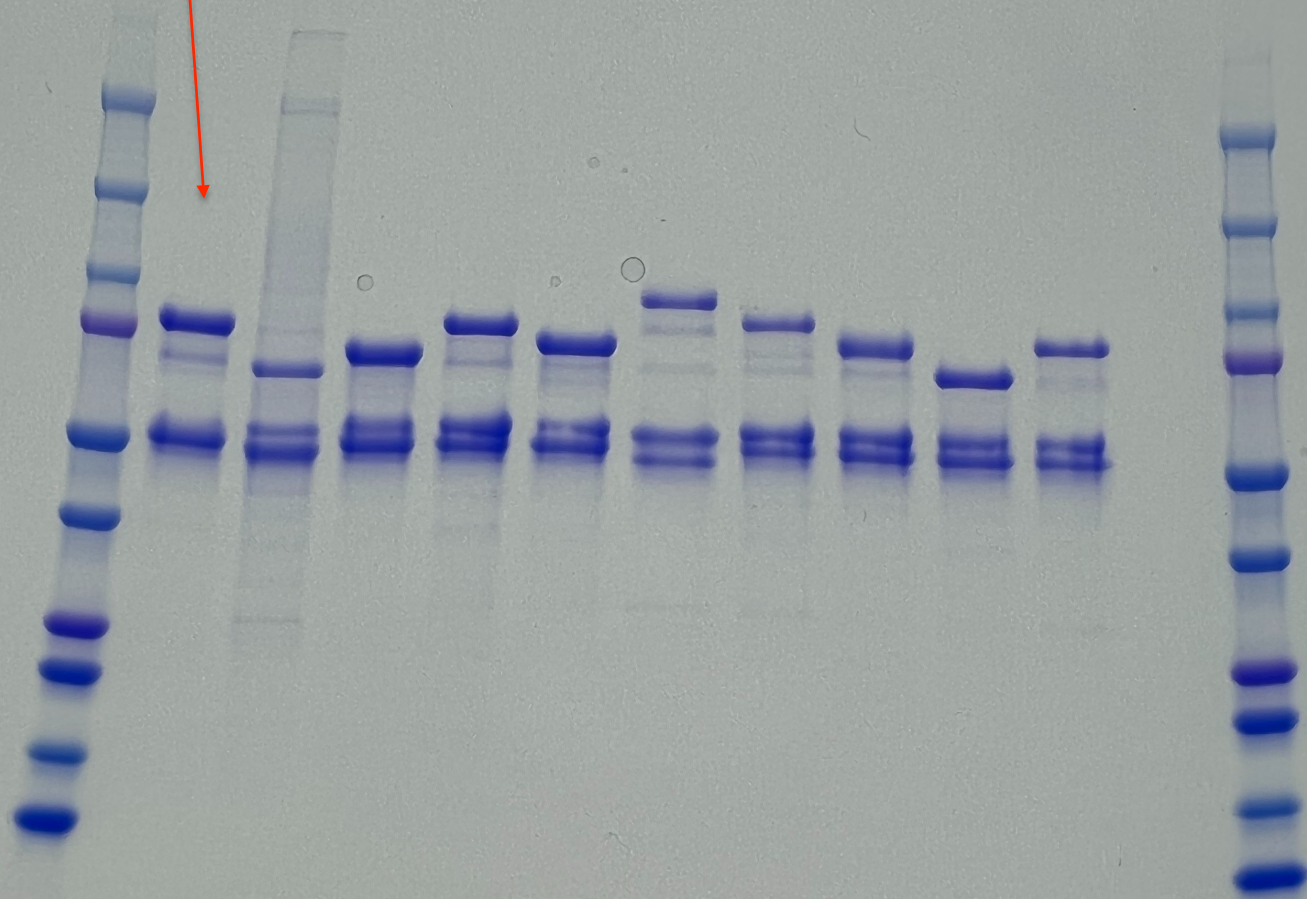

Supplement: fig1-figsupp2-data1 [file elife-83538-fig1-figsupp2-data1-v1.zip]

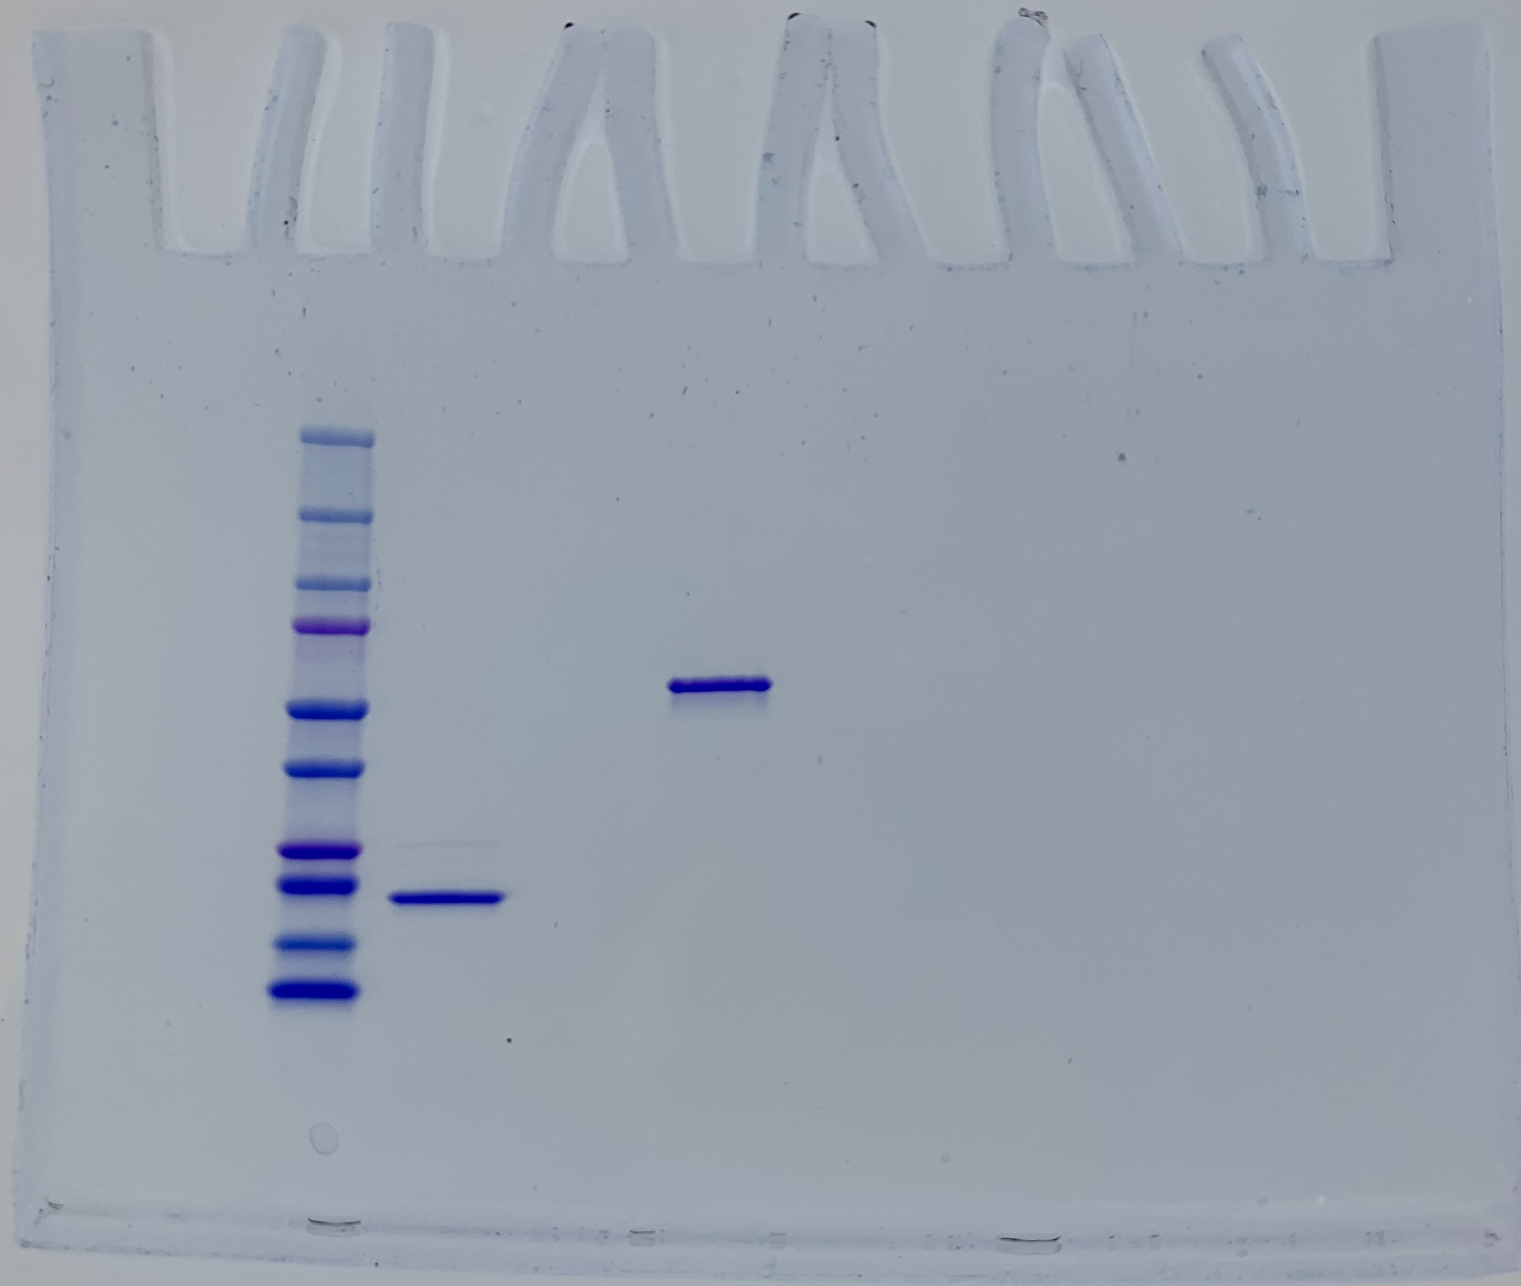

Supplement: fig1-figsupp2-data1 [file elife-83538-fig1-figsupp2-data1-v1.zip]

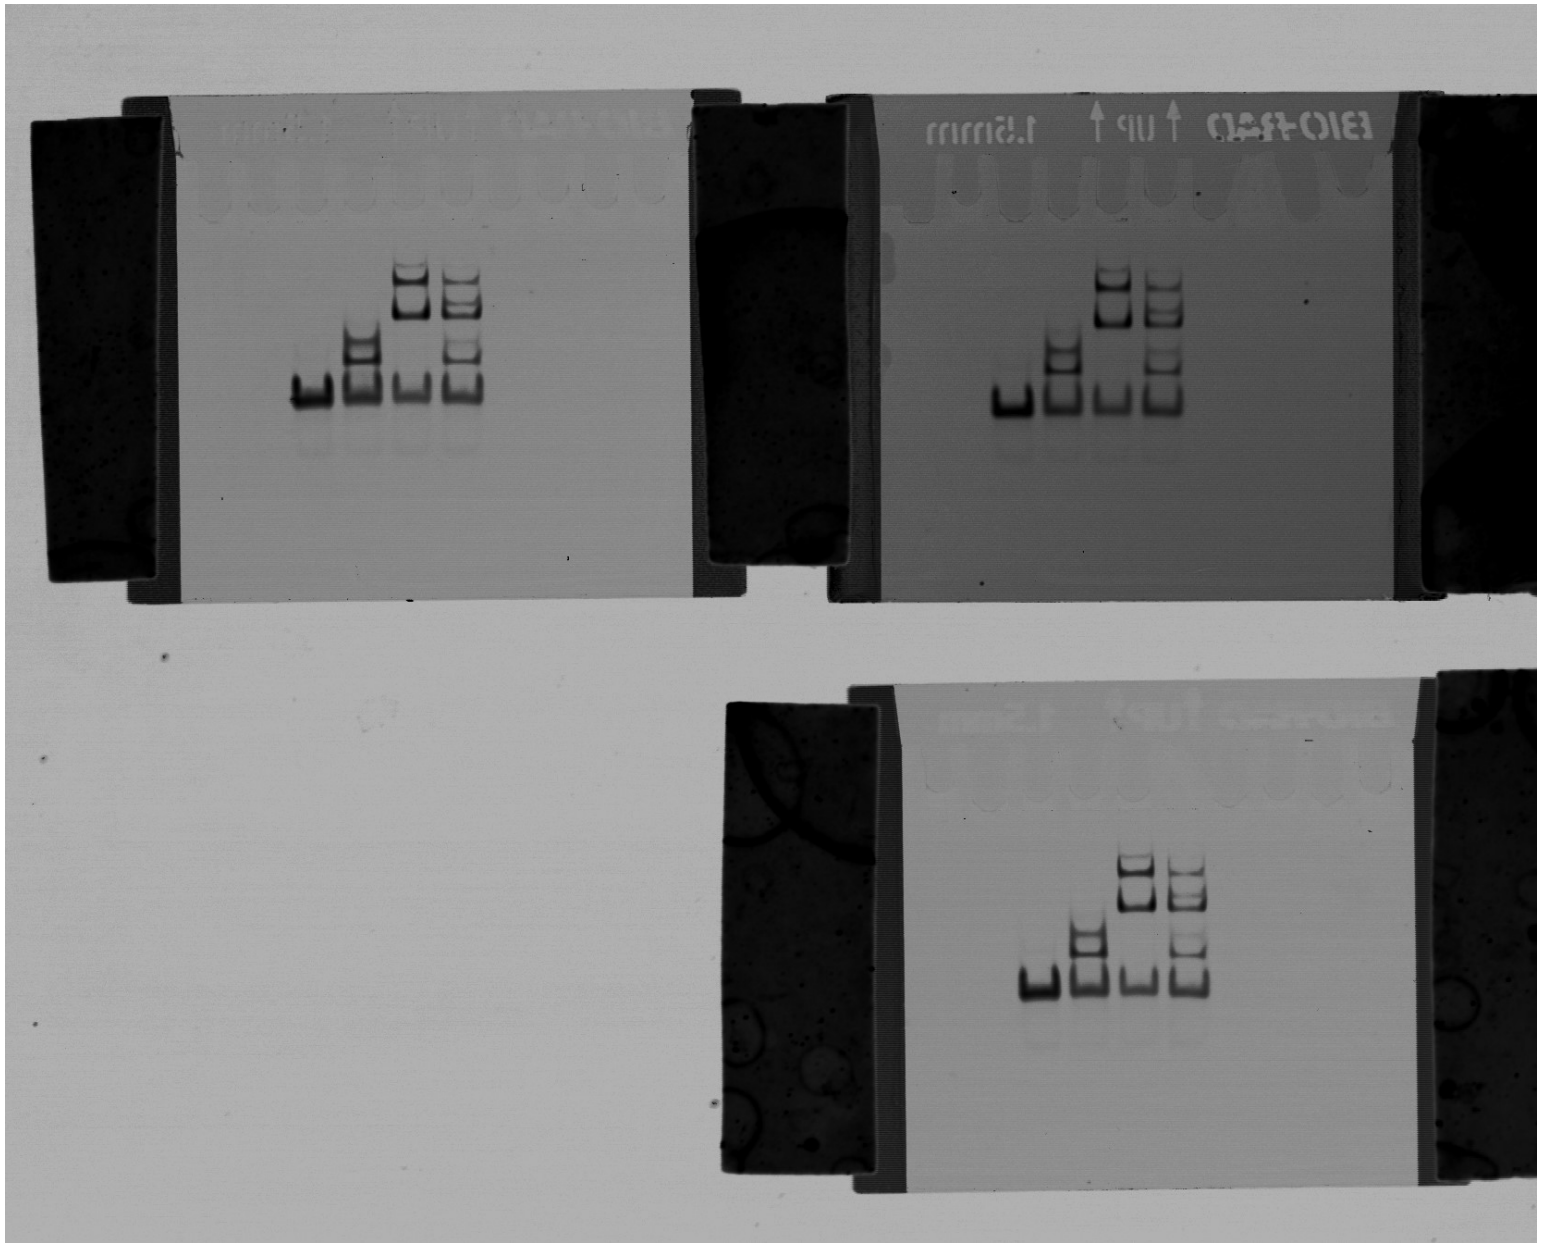

Supplement: fig2-figsupp1-data1 [file elife-83538-fig2-figsupp1-data1-v1.zip]

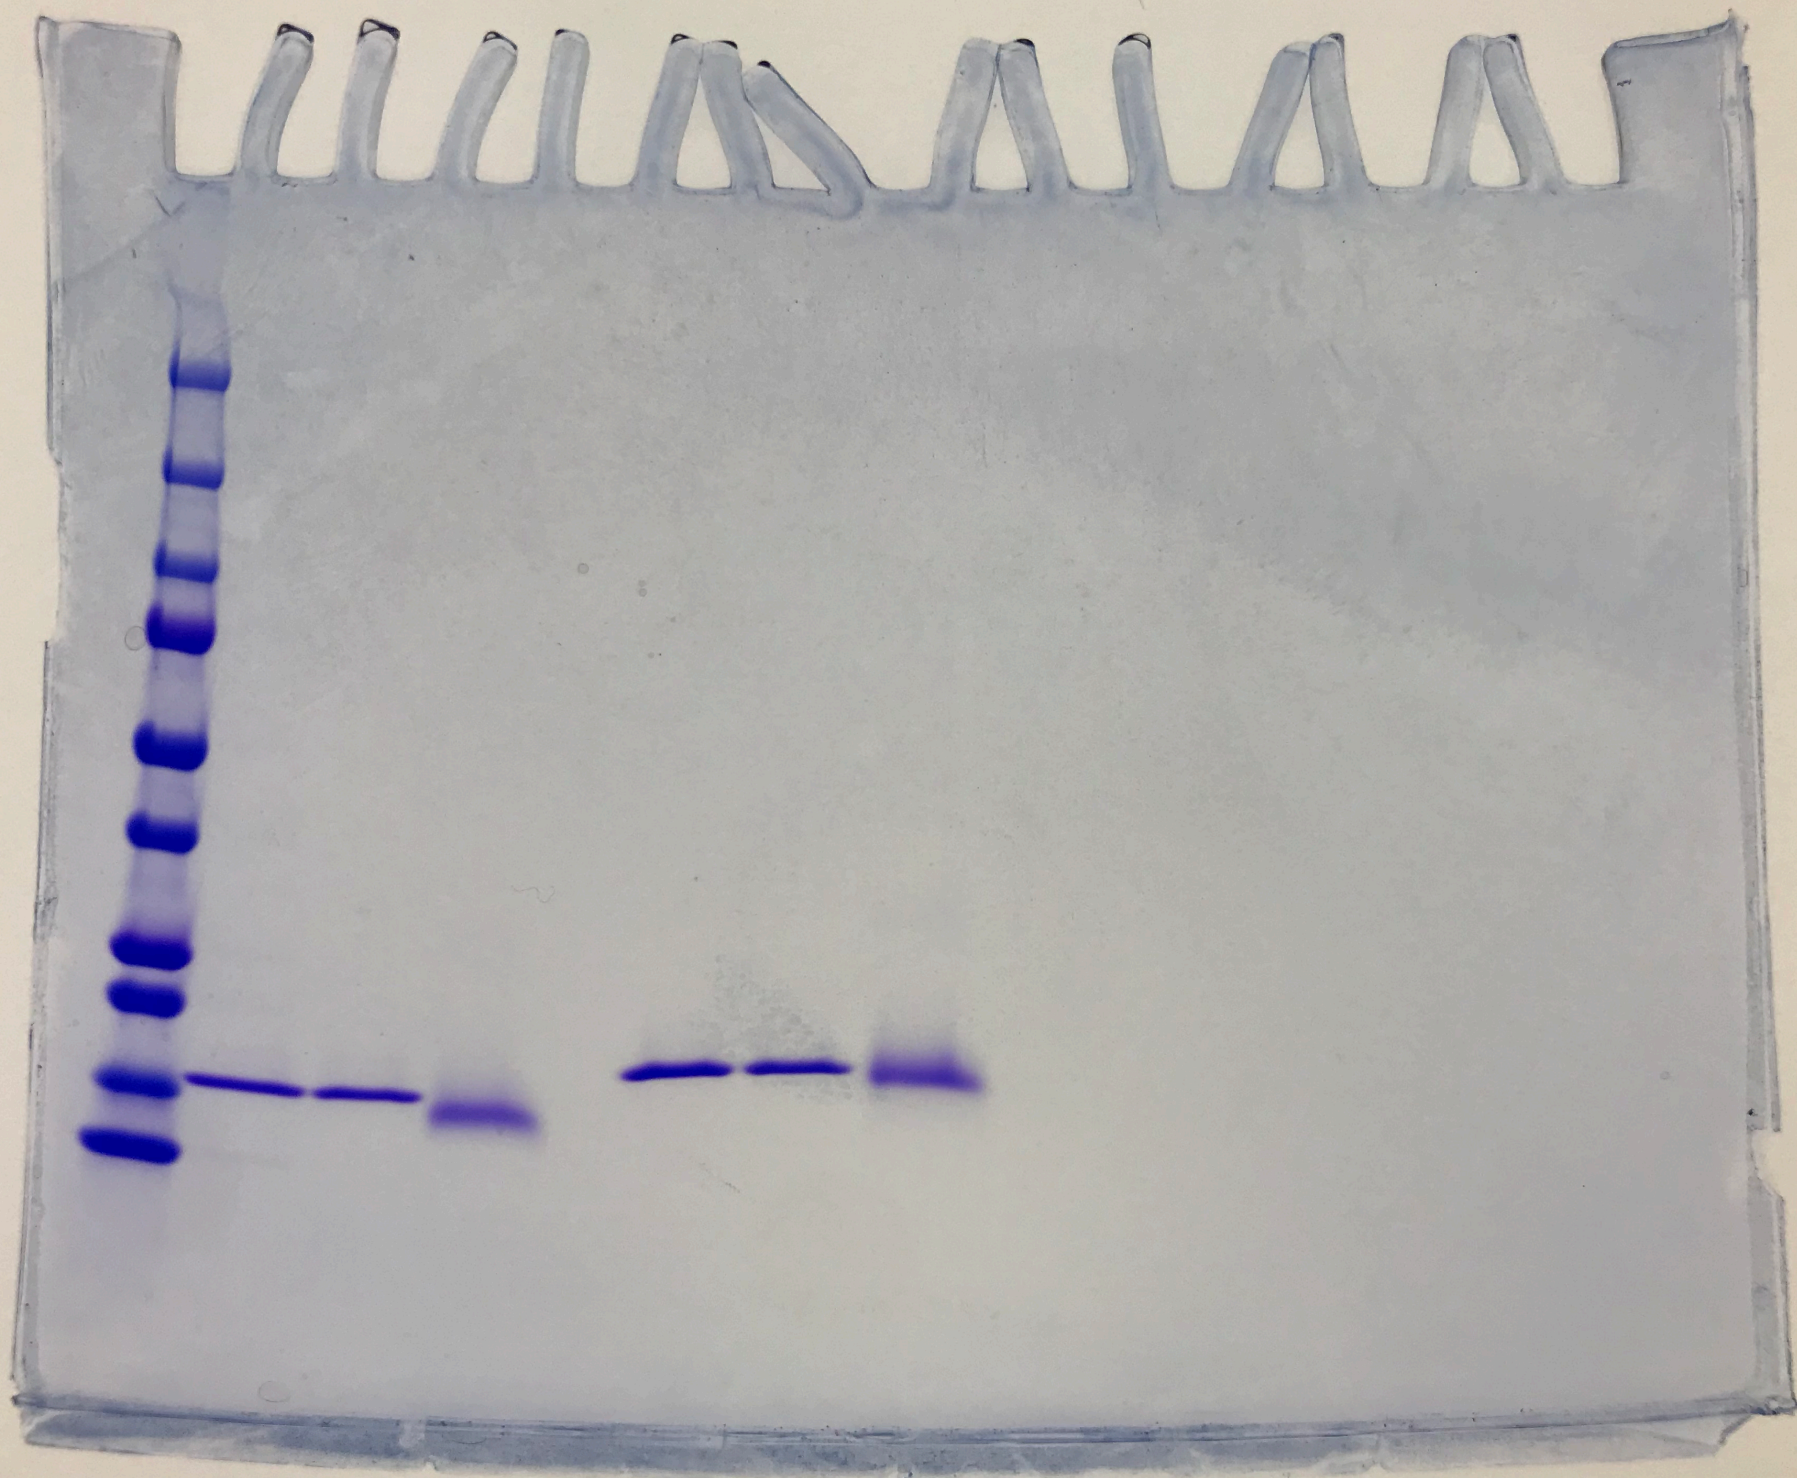

Supplement: fig2-figsupp1-data1 [file elife-83538-fig2-figsupp1-data1-v1.zip]

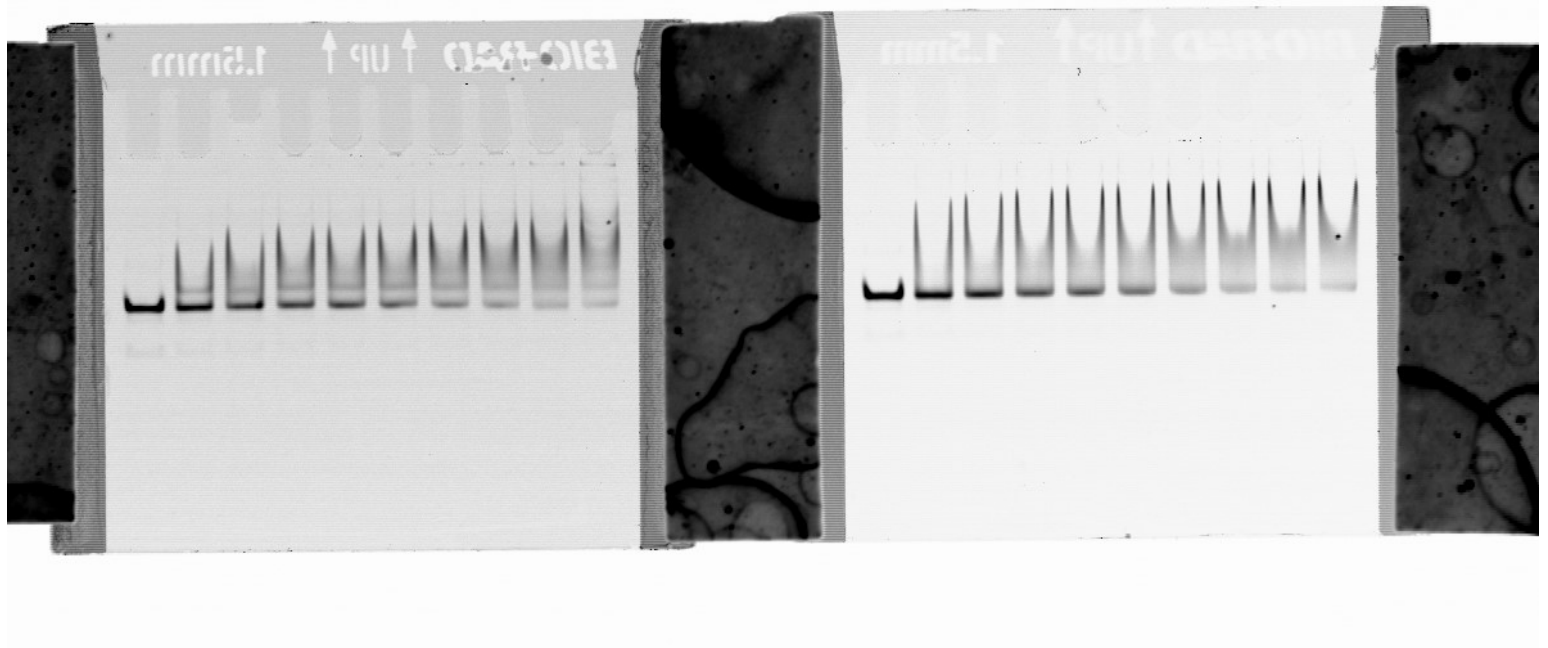

Supplement: fig3-data1 [file elife-83538-fig3-data1-v1.zip]

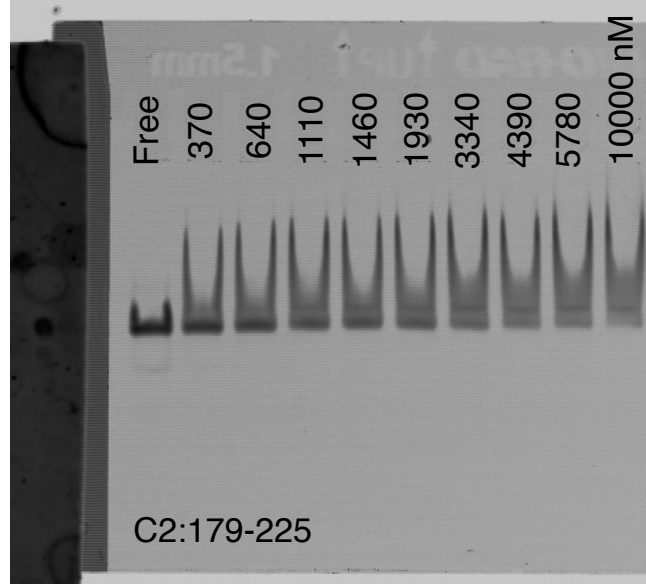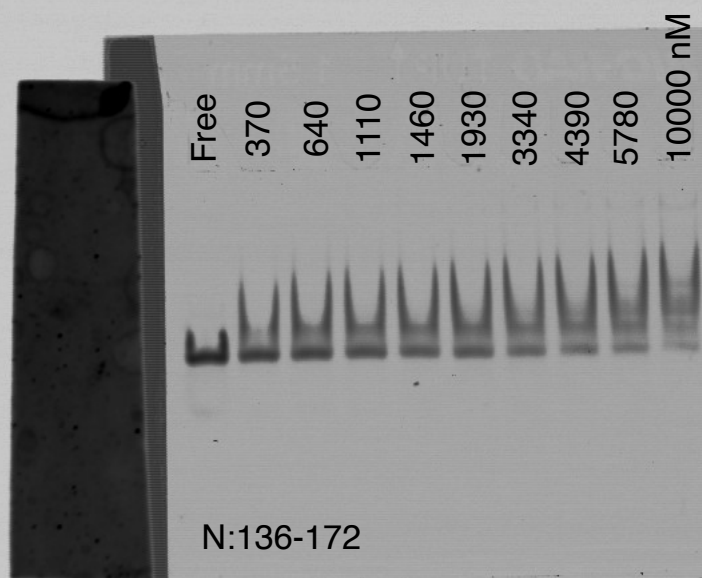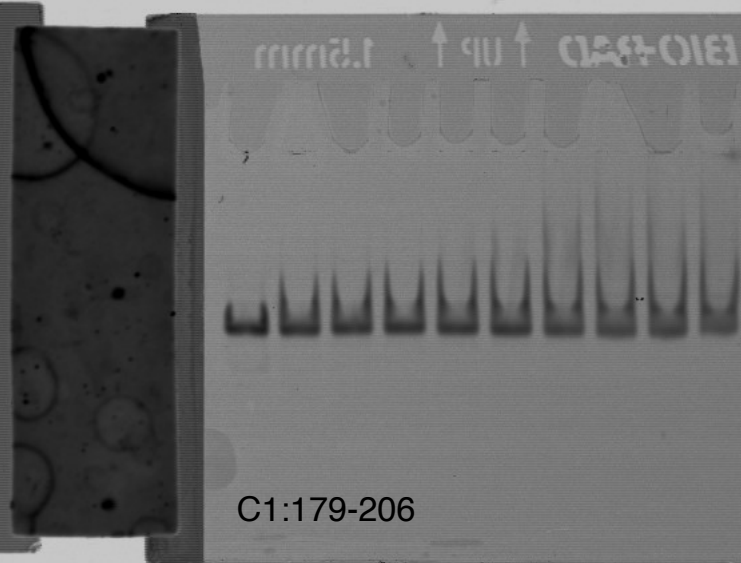

Supplement: fig3-data1 [file elife-83538-fig3-data1-v1.zip]
